# 1           **The regulatory landscapes of human ovarian ageing**

2   Chen Jin<sup>1,9</sup>, Xizhe Wang<sup>1,9</sup>, Adam D. Hudgins<sup>1</sup>, Amir Gamliel<sup>2</sup>, Mingzhuo  
3   Pei<sup>1</sup>, Seungsoo Kim<sup>1</sup>, Daniela Contreras<sup>1</sup>, Jan Hoeijmakers<sup>3,4,5</sup>, Judith  
4   Campisi<sup>6,7</sup>, Rogerio Lobo<sup>1</sup>, Zev Williams<sup>1</sup>, Michael G. Rosenfeld<sup>2</sup> and  
5   Yousin Suh<sup>1,8\*</sup>

6   <sup>1</sup> Department of Obstetrics and Gynecology, Columbia University Medical  
7   Center, New York, NY

8   <sup>2</sup> Howard Hughes Medical Institute, Department and School of Medicine,  
9   University of California, San Diego, La Jolla, CA, USA

10   <sup>3</sup> Department Molecular Genetics, Erasmus University Medical Center  
11   Rotterdam, Rotterdam, The Netherlands

12   <sup>4</sup> Princess Máxima Center for Pediatric Oncology, OncoCode Institute,  
13   Utrecht, The Netherlands

14   <sup>5</sup> Institute for Genome Stability in Ageing and Disease, Cologne  
15   Excellence Cluster for Cellular Stress Responses in Aging-Associated  
16   Diseases (CECAD), University Hospital of Cologne, Cologne, Germany

17   <sup>6</sup> Buck Institute for Research on Aging, Novato, CA, USA

18   <sup>7</sup> Lawrence Berkeley National Laboratory, Berkeley, CA, USA

19   <sup>8</sup> Department of Genetics and Development, Columbia University Medical  
20   Center, New York, NY

21   <sup>9</sup> These authors contributed equally: Chen Jin, Xizhe Wang

22

23   \*Correspondence: [ys3214@cumc.columbia.edu](mailto:ys3214@cumc.columbia.edu) (Y.S.)

24

## 25 **Summary paragraph**

26 The ovary is the first organ to age in the human body, affecting both  
27 fertility and overall health in women<sup>1-8</sup>. However, the biological  
28 mechanisms underlying human ovarian ageing remain poorly understood.  
29 Here we performed single-nuclei multi-omics analysis of young and  
30 reproductively aged human ovaries to understand the molecular and  
31 cellular basis of ovarian ageing in humans. Our analysis reveals  
32 coordinated changes in transcriptomic output and chromatin accessibility  
33 across cell types during ageing, including elevated mTOR and MAPK  
34 signaling, decreased activity of the oxidative phosphorylation and DNA  
35 damage repair pathways, and an increased signature of cellular senescence.  
36 By constructing cell type-specific regulatory networks, we uncover  
37 enhanced activity of the transcription factor CEBPD across cell types in  
38 the aged ovary, with a corresponding significant loss of activity of most  
39 cell identity-associated transcription factors. Moreover, by performing  
40 integrative analyses of our single-nuclei multi-omics data with common  
41 genetic variants associated with age at natural menopause (ANM) from  
42 genome-wide association studies, we demonstrate a global impact of  
43 functional variants on changes in gene regulatory networks across ovarian  
44 cell types. Finally, we nominate about a dozen of functional non-coding  
45 variants, their target genes and cell types and regulatory mechanisms that  
46 underlie genetic association with ANM. This work provides a  
47 comprehensive multimodal landscape of human ovarian ageing and  
48 mechanistic insights into inherited variation of ANM.

## 49 **Main**

50 The ovary is the primary female reproductive organ, and the first tissue to  
51 undergo profound age-associated loss of function in humans, characterized

52 by a progressive decline in follicle number and oocyte quality<sup>1</sup>. The rate of  
53 follicular depletion increases throughout reproductive life, but begins a  
54 more accelerated decline around age 37<sup>9</sup>. This results in a higher risk of  
55 both infertility, and aneuploidy and congenital disabilities in offspring<sup>2</sup>.  
56 There is also overwhelming evidence that female reproductive ageing  
57 influences lifespan and diverse health outcomes<sup>3-8,10,11</sup>. Consequently, an  
58 in-depth understanding of ovarian ageing can benefit not only reproduction  
59 but also longevity and health in women. However, thus far very little is  
60 known about basic biological mechanisms that underlie human ovarian  
61 ageing.

62 Menopause is the time marking the cessation of menstrual cycling and  
63 production of fertile oocytes, and age at natural menopause (ANM) has  
64 profound implications for health and disease risk in women<sup>3-8</sup>. Family and  
65 twin studies have demonstrated a strong relationship between genetics and  
66 ANM<sup>12-15</sup>, suggesting up to a ~6-fold increase in risk of early menopause  
67 for a woman with a family history of early menopause<sup>12,15</sup>. Identification  
68 of the genes contributing to ANM will provide mechanistic insights into  
69 the biological processes underlying ovarian ageing. Genome-wide  
70 association studies (GWAS) have identified hundreds of genetic loci  
71 associated with ANM<sup>16</sup>. However, the great majority (~94%) of the risk  
72 variants reside in non-coding regions of the genome, making it difficult to  
73 assign their functional role in ovarian ageing

74 Many recent studies show that functional non-coding GWAS variants are  
75 significantly enriched in cell type-specific transcriptional regulatory  
76 elements such as enhancers<sup>17-25</sup>. Enhancers have emerged as major points  
77 of integration of intra- and extracellular signals associated with  
78 development, homeostasis, and disease, resulting in context-specific  
79 transcriptional outputs<sup>26</sup>. Cell-specific enhancer activation is driven by

80 combinatorial actions of lineage-determining and signal-dependent  
81 transcription factors (TFs)<sup>27</sup>. Genetic variation affecting enhancer selection  
82 and function is considered a major determinant of differences in cell-  
83 specific gene expression and disease risk between individuals<sup>27</sup>. Therefore,  
84 the identification of functional ANM-associated non-coding regulatory  
85 variants, as well as the target genes and cell types through which they  
86 confer their effects on ANM, is a powerful way to understand the biological  
87 processes underlying ovarian ageing. However, we currently lack an atlas  
88 of the transcriptional regulatory elements that are active in every cell type  
89 in the ovary during ageing.

90 In this study, we systematically characterize human ovarian ageing by  
91 performing single-nuclei multi-omics analysis and by superimposing these  
92 data with ANM-associated GWAS risk variants. Through these efforts, we  
93 identify the functional transcriptional regulatory elements, and functional  
94 non-coding variants and their target genes associated with ANM, across all  
95 cell types in the ovary.

96

### 97 **Single nucleus multi-omics profiling ageing**

98 We performed single-nuclei RNA-seq (snRNA-seq) and single-nuclei  
99 assay for transposase-accessible chromatin using sequencing (snATAC-  
100 seq) on the same flash-frozen human ovarian tissues, which were from  
101 young (n=4; ages 23-29 years) and reproductively old (n=4; ages 49-54  
102 years) autopsy samples of sudden death with normal ovarian histology (Fig.  
103 1a and Supplementary Table 1). After stringent quality control, we retained  
104 42,568 nuclei for snRNA-seq and 41,550 nuclei for snATAC-seq  
105 (Methods). Seurat-based unsupervised clustering<sup>28</sup> and Harmony-based<sup>29</sup>  
106 batch correction on snRNA-seq revealed eight distinct clusters (Methods,

107 Fig. 1b, and Supplementary Fig. 1a). All major somatic cell types in the  
108 ovary, including stromal cells (SC), endothelial cells (blood vessel  
109 endothelial cells (BEC) and lymphatic endothelial cells (LEC)), granulosa  
110 cells (GC), smooth muscle cells (SMC), immune cells (IC), epithelial cells  
111 (EpiC), and theca cells (TC) were identified based on well-defined cell  
112 type-specific markers (Figs. 1b, c). For snATAC-seq, Signac-based  
113 unsupervised clustering<sup>30</sup> and Harmony-based batch correction revealed  
114 seven distinct clusters (Methods, Fig. 1d, and Supplementary Fig. 1b). To  
115 annotate the clusters, we used canonical correlation analysis (CCA) and  
116 mutual nearest neighbors (MNNs)<sup>31</sup> to transfer the cell type labels from  
117 snRNA-seq to snATAC-seq (Methods). Consistently, all major cell types  
118 were also present in snATAC-seq (Fig. 1d and Supplementary Fig. 1c).  
119 Additionally, we confirmed cell type identities by examining chromatin  
120 accessibility at the promoter regions of known markers and calculating a  
121 gene activity score that quantified chromatin accessibility within the gene  
122 body and promoter regions (Fig. 1e and Supplementary Fig. 1d).  
123 Furthermore, we identified cell type-specific differentially expressed genes  
124 (DEGs) and differentially accessible chromatin regions (DARs) for each  
125 cell type (Supplementary Table 2 and 3), and found that the cell types can  
126 be well-distinguished by those DEGs and DARs (Supplementary Figs.  
127 1e,f).

128

### 129 **Altered cell type composition with age**

130 To investigate the dynamic changes in cell type composition during human  
131 ovarian ageing, we compared the cell type proportions of aged and young  
132 ovaries in the snRNA-seq data. We found significant changes in the  
133 proportions of several cell types during ageing (Fig. 2a). For example, the  
134 abundance of granulosa and theca cells, two critical components of ovarian

135 follicles, were significantly decreased in aged compared to young ovaries  
136 (Fig. 2a), in line with the well-known phenomenon of decreasing follicle  
137 number with increasing age<sup>32</sup>. In addition, blood vessel and lymphatic  
138 endothelial cells, the cell layers lining the blood and lymph vessels,  
139 respectively, also markedly decreased in proportion in aged ovaries (Fig.  
140 2a), consistent with the observed negative correlation between ovarian  
141 vascularity and age<sup>33</sup>. Interestingly, epithelial cells were the only cell type  
142 that increased in proportion in aged ovaries (Fig. 2a), potentially reflecting  
143 the lifetime of ovulation-induced rupture and repair experienced by aged  
144 ovaries<sup>34</sup>. Consistently, aged epithelial cells exhibited significantly elevated  
145 expression of cell cycle-associated genes, while aged granulosa cells, theca  
146 cells, and endothelial cells exhibited increased expression of apoptosis-  
147 associated genes and/or decreased expression of cell cycle-associated  
148 genes compared to young counterparts in the ovary (Supplementary Fig. 2a).  
149 In agreement with the snRNA-seq results, we observed almost identical  
150 age-related changes in the cellular composition estimated from the  
151 snATAC-seq data (Fig. 2b). These results indicated that ageing  
152 significantly remodels the cellular architecture of the human ovary.

153

### 154 **Coordinated changes in ageing hallmarks**

155 To investigate the dynamic changes in gene expression during human  
156 ovarian ageing, we identified ageing-associated DEGs for each cell type  
157 (Methods). In total, we identified 3,341 ageing-associated DEGs  
158 (Supplementary Table 4), the number of which ranged from a few hundred  
159 to several thousand, depending on cell type (Supplementary Fig. 2b).  
160 Specifically, granulosa cells have the largest number of ageing-associated  
161 DEGs (n=2,255) (Supplementary Fig. 2b), suggesting that granulosa cells  
162 are more vulnerable to ageing than other cell types in the human ovary.

163 Interestingly, we found that most ageing-associated DEGs are shared  
164 among cell types (Supplementary Fig. 2c) and show congruent changes in  
165 expression (Fig. 2c). Among the “common DEGs” which were  
166 significantly differentially expressed in at least four cell types  
167 (Supplementary Fig. 2d), 218 genes were up-regulated and 182 were down-  
168 regulated in the aged ovary (Supplementary Fig. 2d). Common DEGs  
169 include those reported in the GenAge database as human ageing-related  
170 genes, such as *RICTOR*, *IGF1R*, *MAP3K5*, and *APOE* (Supplementary  
171 Figs. 2e,f). Gene ontology (GO) analysis<sup>35</sup> indicated that common DEGs  
172 were enriched in the “hallmarks of ageing”<sup>36</sup>, including pathways involved  
173 in nutrient sensing signaling, cellular senescence, proteostasis, cellular  
174 communication, and mitochondrial function (Supplementary Fig. 2g). We  
175 also found cell-type-specific ageing-associated DEGs (Supplementary Fig.  
176 2h), such as those enriched in cell type-relevant functions, including  
177 vasculogenesis for blood vessel endothelial cells, follicle development for  
178 granulosa cells, and smooth muscle contraction for smooth muscle cells  
179 (Supplementary Fig. 2i).

180 To gain insight into the dynamic changes in biological pathways during  
181 human ovarian ageing, we used Gene Set Variation Analysis (GSVA)<sup>37</sup> to  
182 estimate the pathway activity score for individual cells and compare the  
183 pathway activity between young and aged ovaries in each cell type  
184 (Methods). We found that half (92/186) of KEGG pathways were  
185 significantly up- or down-regulated in at least six cell types in aged ovaries  
186 (Supplementary Fig. 3a). Genes involved in these pathways showed  
187 congruent changes in expression direction across cell types  
188 (Supplementary Fig. 3a). Notably, expression of genes involved in the  
189 nutrient-sensing signaling pathways, including the mTOR, insulin, and  
190 MAPK pathways, increased in the aged ovaries across cell types, while

191 those involved in oxidative phosphorylation and base excision repair  
192 decreased (Fig. 2d and Supplementary Figs. 3b-e). To validate the age-  
193 related changes in gene expression, we performed *in situ* hybridization  
194 assays and confirmed the increased expression of the mTOR signaling gene  
195 *RICTOR*, and decreased expression of the oxidative phosphorylation gene  
196 *MT-ATP6* in aged ovaries *in vivo* (Figs. 2e-h). Together, these results  
197 indicate that the human ovary undergoes coordinated transcriptomic  
198 changes during ageing, resulting in profound alterations to processes  
199 central to the biology of ageing.

200

## 201 **Cellular senescence in the human ovary**

202 Senescent cell burden increases with age in various tissues in the context  
203 of physiological ageing and ageing-related disease<sup>38-41</sup>. To test if cellular  
204 senescence increases during human ovarian ageing, we examined the  
205 expression of the widely used senescence markers, *CDKN1A* (p21) and  
206 *CDKN2A* (p16), in the human ovary. On average, very few (~0.43%)  
207 ovarian cells expressed *CDKN2A*, while a considerable proportion of  
208 young ovarian cells expressed *CDKN1A* (~9.49%) and a significantly  
209 higher proportion of *CDKN1A*<sup>+</sup> cells (~15.56%) was observed in aged  
210 ovaries (Supplementary Figs. 4a,b). We then calculated the proportion of  
211 *CDKN1A*<sup>+</sup> cells for each cell type in young and aged ovaries. We found a  
212 significant increase in the proportion of *CDKN1A*<sup>+</sup> cells with age in stromal,  
213 granulosa, theca, blood vessel endothelial, and smooth muscle cells (Fig.  
214 3a). Using *in situ* hybridization, we found a ~3-fold increase in both the  
215 proportion of cells expressing *CDKN1A*, and in the average expression of  
216 *CDKN1A*, in aged compared to young ovaries (Figs. 3b,c). In addition, a  
217 subset of senescence-associated secretory phenotype (SASP) genes were  
218 up-regulated in *CDKN1A*<sup>+</sup> cells in the human ovary (Fig. 3d). To gain



219 insight into the transcriptional signatures of *CDKN1A*<sup>+</sup> cells, we identified  
220 the DEGs in *CDKN1A*<sup>+</sup> cells compared to *CDKN1A*<sup>-</sup> cells from both young  
221 and aged stromal cells (Supplementary Fig. 4c). GO analysis indicated that  
222 genes involved in “response to oxygen level” and “HIF-1 signaling  
223 pathway” are up-regulated in *CDKN1A*<sup>+</sup> stromal cells (Supplementary Fig.  
224 4c). We then compared the transcriptomes of *CDKN1A*<sup>+</sup> cells between  
225 young and aged stromal cells and found that genes involved in the HIF-1  
226 pathway as well as those in the nutrient-sensing signaling were up-  
227 regulated in aged- compared to young *CDKN1A*<sup>+</sup> stromal cells  
228 (Supplementary Fig. 4c). To test whether the up-regulation of the HIF-1  
229 pathway is a senescence signature in the ovary, we computed HIF-1  
230 pathway scores based on the HIF-1 pathway-related DEGs that were up-  
231 regulated in *CDKN1A*<sup>+</sup> cells (Supplementary Table 5), including the key  
232 HIF-1 target genes that regulate NAD<sup>+</sup> metabolism (*NAMPT*)<sup>42</sup>, cellular  
233 respiration (*PDK1*)<sup>43</sup>, and apoptosis (*DDIT4*)<sup>44</sup> in response to hypoxia  
234 (Supplementary Fig. 4d). We found that the HIF-1 pathway was  
235 significantly enhanced in *CDKN1A*<sup>+</sup> cells and further elevated during  
236 ageing in most cell types (Fig. 3e). Given the reduced vasculature of aged  
237 ovaries<sup>33</sup>, our results suggested that the hypoxic environment might be a  
238 critical factor in driving cellular senescence in human ovaries, through  
239 upregulation of HIF-1 signaling.

240

## 241 **Ageing alters cellular communication**

242 Altered intercellular communication is a hallmark of ageing<sup>36</sup>. To explore  
243 potential age-related alterations to the ovarian cellular communication  
244 network, we used CellChat<sup>45</sup>, which models the probability of the cell-cell  
245 interaction network based on gene expression and prior knowledge of  
246 ligand-receptor interactions. To gain insight into the intercellular

247 communication between ovarian somatic cells and oocytes, we integrated  
248 our snRNA-seq with publicly available human oocyte single-cell  
249 transcriptomes from young and reproductively aged ovaries<sup>46</sup>. We found  
250 that ageing slightly reduced both the total number and overall strength of  
251 intercellular interactions (Supplementary Fig. 5a,b). Strikingly, aged  
252 granulosa and theca cells received far fewer signals from all other cell types,  
253 and the same trend was observed for blood/lymphatic endothelial cells and  
254 immune cells (Fig. 3f). Of particular relevance to fertility, the number of  
255 signals received by oocytes from granulosa and theca cells profoundly  
256 decreased with age (Fig. 3f), consistent with evidence that the functions of  
257 granulosa and theca cells in supporting oocytes fail during ageing<sup>47</sup>. In  
258 contrast, the interaction number and strength from all cell types to  
259 epithelial cells increased (Fig. 3f and Supplementary Fig. 5c). We further  
260 identified the incoming and outgoing signaling pathways that exhibited a  
261 significant difference in communication probability between young and  
262 aged ovaries for each cell type (Fig. 3g). In total, we identified 46 pathways  
263 with significant differential communication probability with age (Fig. 3g).  
264 Notably, the COLLAGEN and FN1 (Fibronectin) pathways, core  
265 components of extracellular matrix (ECM) biology, exhibited a  
266 significantly higher communication probability in most cell types in the  
267 young ovary, suggesting an essential role of the ECM in maintaining ovary  
268 function. Interestingly, epithelial cells were the only cell type that exhibited  
269 a significantly higher communication probability of COLLAGEN and FN1  
270 signaling in the aged ovary (Fig. 3g). COLLAGEN and FN1 signaling is  
271 known to promote the proliferation of epithelial cells<sup>48,49</sup>, suggesting that  
272 activation of these pathways may explain the increased proportion of  
273 epithelial cells we observed in the aged ovary (Figs. 2a,b). In contrast, the  
274 JAM (Junction adhesion molecule), PARs (Protease-activated receptors),  
275 and NCAM (Neural cell adhesion molecule) pathways, which mediate cell-

276 cell adhesion processes, exhibited a significantly higher communication  
277 probability in most cell types in the aged ovary (Fig. 3g). The PDGF  
278 pathway, which has known roles in fibroinflammatory processes, was  
279 significantly enriched in all the cell types in the aged ovary (Fig. 3g),  
280 consistent with the finding of elevated fibroinflammatory cytokines in aged  
281 human ovarian follicular fluid<sup>50</sup>. In contrast to the age-related loss of  
282 interactions between granulosa and theca cells and oocytes (Fig. 3f),  
283 several known signaling pathways that are critical to maintaining the  
284 function of oocytes and granulosa cells were specifically enriched in young  
285 oocytes and granulosa cells, including the FSH and GDF pathways that  
286 maintain follicle growth and function<sup>51</sup> (Fig. 3g). Our results demonstrate  
287 that human ovarian ageing is characterized by significant changes in  
288 cellular communications among oocytes and somatic cell types, potentially  
289 contributing to an age-related loss of follicular function, tissue fibrosis, and  
290 epithelial hyperplasia.

291

## 292 **Ageing alters cell identity TF networks**

293 Master transcription factors (TFs) largely determine cell identity<sup>52</sup>. As loss  
294 of cell identity with age has been implicated in age-related tissue  
295 dysfunction, we next identified cell identity-associated TFs, and  
296 investigated for age-related changes in their activity (Methods) in the  
297 snATAC-seq data. As expected, individual cell types can be distinguished  
298 by predicted motif activity (Fig. 4a and Supplementary Table 6). The  
299 motifs of folliculogenesis-related TFs, mainly AP-1 and RUNX  
300 transcription factors<sup>53</sup>, were predominantly enriched in granulosa cells (Fig.  
301 4b and Supplementary Fig. 6a). Steroidogenesis-related TFs<sup>54,55</sup> were  
302 mainly enriched in granulosa cells and theca cells (Supplementary Fig. 6b).  
303 The TF footprinting analysis highlighted cell type-specific enrichment of

304 those TFs in granulosa cells and theca cells (Supplementary Fig. 6c). ETS  
305 TFs are central regulators of endothelial and immune cells<sup>56,57</sup>, both of  
306 which originate from the hemogenic endothelium during embryogenesis<sup>58</sup>.  
307 Consistently, a family of ETS TFs were enriched in endothelial and  
308 immune cells (Fig. 4b and Supplementary Fig. 6d). Additionally, we  
309 identified the TFs enriched in epithelial cells and stromal cells, respectively  
310 (Fig. 4b and Supplementary Fig. 6e).

311 To reveal the TFs that govern human ovarian ageing, we compared the  
312 predicted motif activity between young and aged cells in each cell type  
313 (Supplementary Table 7). Surprisingly, CCAAT/enhancer binding proteins  
314 (C/EBPs) motif activities significantly increased in most cell types except  
315 immune cells and epithelial cells (Fig. 4c). Among the members of this TF  
316 family, *CEBPD* was highly expressed across cell types, and its age-related  
317 changes in expression were in line with the changes in motif activity during  
318 ovarian ageing (Fig. 4d). In addition, most cell identity-associated TFs  
319 exhibited significantly decreased motif activity, while epithelial cell  
320 identity-associated TFs exhibited significantly enhanced motif activity  
321 during ovarian ageing (Fig. 4c). We further calculated cell identity scores  
322 in each cell type by examining the expression level of the top 100 cell type-  
323 specific genes (Methods). We found that cells in young ovaries exhibited  
324 high expression of their corresponding cell type-specific genes and  
325 minimal expression of other cell type-specific genes (Supplementary Fig.  
326 6f). Surprisingly, granulosa cells, immune cells, and theca cells in aged  
327 ovaries expressed deficient levels of their corresponding cell type-specific  
328 genes, and instead expressed high levels of stromal cell-specific genes  
329 (Supplementary Fig. 6f). These results suggest a prevalent loss of cell  
330 identity in aged ovaries.

331 We next sought to build cell type-specific TF regulatory networks for

332 human ovarian ageing, and first constructed the cis co-accessibility  
333 networks (CCANs) in each cell type using Cicero<sup>59</sup>. Next, we defined the  
334 putative enhancers and promoters by overlaying the CCAN peaks with  
335 human ovary tissue enhancer and promoter annotations from the ENCODE  
336 database<sup>60</sup>. Finally, we defined a gene as a CCAN-linked gene if one of the  
337 CCAN peaks lies in its putative promoter (Supplementary Fig. 7a). In this  
338 way, we identified varying numbers of CCANs and CCAN-linked genes  
339 for each cell type (Supplementary Fig. 7b). Most cell type-associated  
340 DEGs and ageing-associated DEGs significantly overlapped with CCAN-  
341 linked genes in all cell types (Supplementary Fig. 7c), suggesting that  
342 CCANs play essential roles in determining cell identity and the regulation  
343 of ovarian ageing. For each cell type, we built the ageing-associated TF  
344 regulatory networks governed by the top TFs (n=3~4) that change with age,  
345 as defined by the predicted motif activity. Those ageing-associated DEGs  
346 whose promoters or putative enhancers contained both accessible peaks  
347 and motifs of the top ageing-associated TFs within the peaks were defined  
348 as candidate targets of the selected TFs (Supplementary Fig. 7a). We  
349 generated the ovarian ageing-associated TF regulatory network for each  
350 cell type and found a critical role for CEBPD in human ovarian ageing  
351 (Figs. 4e-k). We found that CEBPD target genes are enriched in processes  
352 of known importance to the basic biology of ageing, including mTOR  
353 signaling, MAPK signaling, and cellular senescence, in multiple cell types  
354 (Supplementary Fig. 7d).

355

### 356 **Cellular targets of ANM genetic risk**

357 The most comprehensive recent ANM GWAS identified 290 ANM-  
358 associated genetic risk loci<sup>16</sup>. Using gene expression data from several  
359 publicly-available datasets, the Ruth et al. study implicated hematopoietic

360 stem and progenitor cells as the major cellular targets of ANM-associated  
361 risk variants<sup>16</sup>. Since the Ruth et al. analysis did not include single-cell data  
362 from the human ovary, we next investigated whether any specific cell types  
363 in the human ovary were enriched for ANM-associated variants, by  
364 performing MAGMA<sup>61,62</sup> analysis using our snRNA-seq dataset. For  
365 comparison, we also included GWAS data from 2 other ovarian  
366 phenotypes, ovarian epithelial cancer (OEC) and polycystic ovary  
367 syndrome (PCOS). We found that ANM-associated variants were  
368 significantly enriched in almost all cell types (Fig. 5a), indicating a  
369 systemic effect of ageing on the ovary. In contrast, OEC- and PCOS-  
370 associated variants were enriched in epithelial cells and granulosa cells,  
371 respectively (Fig. 5a). To investigate if any cell type-specific regions of  
372 chromatin accessibility were enriched for ANM-associated variants, we  
373 also performed cell type-specific linkage disequilibrium (LD) score  
374 regression<sup>63</sup> using our snATAC-seq dataset. Consistently, ANM-  
375 associated variants showed a significant enrichment in multiple cell types  
376 (Fig. 5b). Together with the coordinated changes in transcriptomes and  
377 chromatin accessibility we observed across cell types, the results from our  
378 analyses of ANM genetic signal suggest that all ovarian cell types  
379 contribute to ovarian ageing.

380

### 381 **Functional ANM variants and genes nominated**

382 To gain insights into how ANM-associated variants contribute to ovarian  
383 ageing, we performed post-GWAS analyses to identify functional  
384 regulatory variants and affected target genes. Using 290 ANM-associated  
385 GWAS lead variants from Ruth et al.<sup>16</sup>, we first compiled a comprehensive  
386 set of coinherited variants based on LD ( $R^2$  value  $\geq 0.8$ ) calculated from  
387 phase 1 genotypes of individuals of European ancestry in the 1000

388 Genomes dataset (Methods). In total, we identified 5,555 ANM-associated  
389 variants (Supplementary Table 8). To identify the functional variants that  
390 may affect transcriptional regulatory activity in each cell type, we first  
391 overlapped ANM-associated variants with the putative enhancers and  
392 promoters we identified in each cell type. In this way, we identified 101  
393 candidate functional variants (Supplementary Fig. 8 and Supplementary  
394 Table 9) and found that a substantial number of these variants were shared  
395 across several cell types (Fig. 5c). Next, we focused on the putative  
396 functional variants that were shared in at least four cell types, among which  
397 6 variants occurred in DNA damage response (DDR)-related gene loci (Fig.  
398 5d and Supplementary Figs. 9a-e). The DDR is the major pathway linked  
399 to ovarian ageing as detected by GWAS of ANM<sup>16</sup> and our results highlight  
400 the functional role of ANM-associated variants on the regulation of DDR  
401 across major ovarian cell types. For example, the rs3741605 (T>C) allele,  
402 associated with delayed ANM (BETA>0; Supplementary Table 10), occurs  
403 in the putative promoter of the *HELB* gene, encoding DNA helicase B<sup>64</sup>,  
404 that is active in most cell types in the ovary, including stromal, endothelial,  
405 theca, granulosa, and immune cells (Fig. 5d). Previously, multiple  
406 missense variants predicted to be deleterious have been identified in *HELB*  
407 that are associated with early ANM<sup>16</sup>. Remarkably, expression quantitative  
408 trait loci (eQTL) analysis from the GTEx database<sup>65</sup> indicated that the C  
409 allele of rs3741605 was significantly correlated with increased expression  
410 of *HELB* in the human ovary (Fig. 5f). This result suggest that the  
411 functional non-coding variant rs3741605 may contribute to delayed ANM  
412 by upregulating the expression of a critical DNA repair gene, thereby  
413 conferring improved genome maintenance.

414 To explore the potential mechanisms underlying the influence of variants  
415 on gene expression, we predicted the effect of candidate functional variants

416 on TF binding activity by applying gapped k-mer support vector machine-  
417 based methods (LS-GKM<sup>66</sup> and deltaSVM<sup>67</sup>) (Methods). We found that the  
418 delayed ANM-associated C allele of rs3741605 could enhance TF binding  
419 activity (Fig. 5e), showing a high concordance of predicted beneficial  
420 allelic effect on the increased expression of *HELB* and delayed ANM  
421 through enhanced genome maintenance.

422 We also identified functional regulatory variants with predicted deleterious  
423 effects on ANM. The variant rs13263296 is located in the *DEPTOR* locus,  
424 a key gene involved in mTOR signaling (Fig. 5g and Supplementary Fig.  
425 10a), and the T allele of rs13263296 is associated with early ANM  
426 (BETA<0; Supplementary Table 10) and occurs in the putative  
427 transcription start site (TSS)-proximal enhancer of the *DEPTOR* gene in  
428 most cell types (Fig. 5g). We observed significant up-regulation of  
429 *DEPTOR* expression in aged granulosa cells and epithelial cells  
430 (Supplementary Fig. 10b). Of note, rs13263296 (C>T) was not  
431 significantly associated with increased *DEPTOR* expression in the human  
432 ovary (Fig. 5i), perhaps due to the use of bulk tissue in the eQTL analysis.  
433 Mechanistically, the deltaSVM analysis suggested that rs13263296 (C>T)  
434 may affect *DEPTOR* expression by enhancing TF binding activity (Fig. 5h).  
435 In addition to these loci, we identified several functional regulatory  
436 variants located in oxidative phosphorylation and MAPK signaling-related  
437 gene loci (Supplementary Figs. 10c,d). Taken together, our integrated  
438 analyses revealed the global effects of ANM-associated non-coding  
439 variants on gene expression across ovarian cell types and nominated  
440 functional regulatory ANM risk variants that may dysregulate genes  
441 involved in pathways of relevance to the canonical hallmarks of ageing,  
442 such as mTOR and genome maintenance.

443 In summary, our single nuclei multi-omic analysis of young and



444 reproductively aged ovaries provides high-resolution characterization of  
445 the transcriptional regulatory landscape at the single-cell level, uncovering  
446 conserved mechanisms of ageing biology in action, such as the  
447 hyperactivity of mTOR observed across all ovarian somatic cell types with  
448 age. Our results raise the hope that geroprotectors targeting the basic  
449 biology of ageing, such as mTOR signaling, may be used to delay  
450 reproductive ageing in women. Furthermore, our integrative post-GWAS  
451 analyses of ANM provides biological insights into the role of inherited  
452 non-coding variants in ovarian ageing in humans, nominating new  
453 functional variants for follow-up interrogation. These findings expand our  
454 understanding of inherited variation in ANM and provide a roadmap for  
455 the functional dissection of the non-coding genetic variation influencing  
456 ANM, pointing towards the nomination of new therapeutic targets for  
457 reproductive health in women.

## 458 References

- 459 1 Broekmans, F., Soules, M. & Fauser, B. Ovarian aging: mechanisms and clinical  
460 consequences. *Endocrine reviews* **30**, 465-493 (2009).
- 461 2 Herbert, M., Kalleas, D., Cooney, D., Lamb, M. & Lister, L. Meiosis and maternal aging:  
462 insights from aneuploid oocytes and trisomy births. *Cold Spring Harbor perspectives*  
463 *in biology* **7**, a017970 (2015).
- 464 3 Muka, T. *et al.* Association of age at onset of menopause and time since onset of  
465 menopause with cardiovascular outcomes, intermediate vascular traits, and all-cause  
466 mortality: a systematic review and meta-analysis. *JAMA cardiology* **1**, 767-776 (2016).
- 467 4 Rahman, I., Åkesson, A. & Wolk, A. Relationship between age at natural menopause  
468 and risk of heart failure. *Menopause* **22**, 12-16 (2015).
- 469 5 Sullivan, S. D. *et al.* Effect of age of self-reported, non-surgical menopause on time to  
470 first fracture and bone mineral density in the women's health initiative observational  
471 study. *Menopause (New York, NY)* **22**, 1035 (2015).
- 472 6 Shen, L. *et al.* Association between earlier age at natural menopause and risk of  
473 diabetes in middle-aged and older Chinese women: The Dongfeng-Tongji cohort  
474 study. *Diabetes & metabolism* **43**, 345-350 (2017).
- 475 7 Green, J. *et al.* Reproductive factors and risk of oesophageal and gastric cancer in the  
476 Million Women Study cohort. *British journal of cancer* **106**, 210-216 (2012).
- 477 8 Cancer, C. G. o. H. F. i. B. Menarche, menopause, and breast cancer risk: individual  
478 participant meta-analysis, including 118 964 women with breast cancer from 117  
479 epidemiological studies. *The lancet oncology* **13**, 1141-1151 (2012).
- 480 9 Faddy, M. & Gosden, R. Ovary and ovulation: a model conforming the decline in follicle  
481 numbers to the age of menopause in women. *Human reproduction* **11**, 1484-1486  
482 (1996).
- 483 10 Habermehl, T. L. *et al.* Extension of longevity and reduction of inflammation is ovarian-  
484 dependent, but germ cell-independent in post-reproductive female mice.  
485 *GeroScience* **41**, 25-38 (2019).
- 486 11 Cargill, S. L., Carey, J. R., Müller, H. G. & Anderson, G. Age of ovary determines  
487 remaining life expectancy in old ovariectomized mice. *Aging cell* **2**, 185-190 (2003).
- 488 12 Cramer, D. W., Xu, H. & Harlow, B. L. Family history as a predictor of early menopause.  
489 *Fertility and sterility* **64**, 740-745 (1995).
- 490 13 Torgerson, D. J., Thomas, R. E. & Reid, D. M. Mothers and daughters menopausal ages:  
491 is there a link? *European Journal of Obstetrics & Gynecology and Reproductive Biology*  
492 **74**, 63-66 (1997).
- 493 14 Murabito, J. M., Yang, Q., Fox, C., Wilson, P. W. & Cupples, L. A. Heritability of age at  
494 natural menopause in the Framingham Heart Study. *The Journal of Clinical*  
495 *Endocrinology & Metabolism* **90**, 3427-3430 (2005).
- 496 15 Morris, D. H., Jones, M. E., Schoemaker, M. J., Ashworth, A. & Swerdlow, A. J. Familial  
497 concordance for age at natural menopause: results from the Breakthrough  
498 Generations Study. *Menopause* **18**, 956-961 (2011).
- 499 16 Ruth, K. S. *et al.* Genetic insights into biological mechanisms governing human ovarian  
500 ageing. *Nature* **596**, 393-397, doi:10.1038/s41586-021-03779-7 (2021).
- 501 17 Corradin, O. *et al.* Combinatorial effects of multiple enhancer variants in linkage  
502 disequilibrium dictate levels of gene expression to confer susceptibility to common  
503 traits. *Genome research* **24**, 1-13, doi:10.1101/gr.164079.113 (2014).
- 504 18 Trynka, G. *et al.* Chromatin marks identify critical cell types for fine mapping complex  
505 trait variants. *Nature genetics* **45**, 124-130, doi:10.1038/ng.2504 (2013).
- 506 19 Hnisz, D. *et al.* Super-enhancers in the control of cell identity and disease. *Cell* **155**,  
507 934-947, doi:10.1016/j.cell.2013.09.053 (2013).

- 508 20 Maurano, M. T. *et al.* Systematic localization of common disease-associated variation  
509 in regulatory DNA. *Science (New York, N.Y.)* **337**, 1190-1195,  
510 doi:10.1126/science.1222794 (2012).
- 511 21 Altshuler, D., Daly, M. J. & Lander, E. S. Genetic mapping in human disease. *Science*  
512 *(New York, N.Y.)* **322**, 881-888, doi:10.1126/science.1156409 (2008).
- 513 22 Musunuru, K. *et al.* From noncoding variant to phenotype via SORT1 at the 1p13  
514 cholesterol locus. *Nature* **466**, 714-719, doi:10.1038/nature09266 (2010).
- 515 23 Stitzel, M. L. *et al.* Global epigenomic analysis of primary human pancreatic islets  
516 provides insights into type 2 diabetes susceptibility loci. *Cell Metab* **12**, 443-455,  
517 doi:10.1016/j.cmet.2010.09.012 (2010).
- 518 24 Harismendy, O. *et al.* 9p21 DNA variants associated with coronary artery disease  
519 impair interferon- $\gamma$  signalling response. *Nature* **470**, 264-268,  
520 doi:10.1038/nature09753 (2011).
- 521 25 Lee, J. C. *et al.* Human SNP links differential outcomes in inflammatory and infectious  
522 disease to a FOXO3-regulated pathway. *Cell* **155**, 57-69,  
523 doi:10.1016/j.cell.2013.08.034 (2013).
- 524 26 Levine, M. Transcriptional enhancers in animal development and evolution. *Current*  
525 *biology : CB* **20**, R754-763, doi:10.1016/j.cub.2010.06.070 (2010).
- 526 27 Heinz, S., Romanoski, C. E., Benner, C. & Glass, C. K. The selection and function of cell  
527 type-specific enhancers. *Nat Rev Mol Cell Biol* **16**, 144-154, doi:10.1038/nrm3949  
528 (2015).
- 529 28 Hao, Y. *et al.* Integrated analysis of multimodal single-cell data. *Cell* (2021).
- 530 29 Korsunsky, I. *et al.* Fast, sensitive and accurate integration of single-cell data with  
531 Harmony. *Nature methods* **16**, 1289-1296 (2019).
- 532 30 Stuart, T., Srivastava, A., Madad, S., Lareau, C. A. & Satija, R. Single-cell chromatin  
533 state analysis with Signac. *Nature methods*, 1-9 (2021).
- 534 31 Stuart, T. *et al.* Comprehensive integration of single-cell data. *Cell* **177**, 1888-1902.  
535 e1821 (2019).
- 536 32 Hansen, K. R. *et al.* A new model of reproductive aging: the decline in ovarian non-  
537 growing follicle number from birth to menopause. *Human reproduction* **23**, 699-708  
538 (2008).
- 539 33 Costello, M. F. *et al.* Power doppler ultrasound assessment of the relationship  
540 between age and ovarian perifollicular blood flow in women undergoing in vitro  
541 fertilization treatment. *Journal of assisted reproduction and genetics* **23**, 359-365  
542 (2006).
- 543 34 Fathalla, M. F. Incessant ovulation--a factor in ovarian neoplasia? *Lancet (London,*  
544 *England)* **2**, 163, doi:10.1016/s0140-6736(71)92335-x (1971).
- 545 35 Zhou, Y. *et al.* Metascape provides a biologist-oriented resource for the analysis of  
546 systems-level datasets. *Nature communications* **10**, 1-10 (2019).
- 547 36 López-Otín, C., Blasco, M. A., Partridge, L., Serrano, M. & Kroemer, G. The hallmarks  
548 of aging. *Cell* **153**, 1194-1217 (2013).
- 549 37 Hänzelmann, S., Castelo, R. & Guinney, J. GSVA: gene set variation analysis for  
550 microarray and RNA-seq data. *BMC bioinformatics* **14**, 1-15 (2013).
- 551 38 Wang, C. *et al.* DNA damage response and cellular senescence in tissues of aging mice.  
552 *Aging cell* **8**, 311-323 (2009).
- 553 39 Krishnamurthy, J. *et al.* Ink4a/Arf expression is a biomarker of aging. *The Journal of*  
554 *clinical investigation* **114**, 1299-1307 (2004).
- 555 40 Sis, B. *et al.* Accelerated expression of senescence associated cell cycle inhibitor  
556 p16INK4A in kidneys with glomerular disease. *Kidney international* **71**, 218-226 (2007).
- 557 41 Chinta, S. J. *et al.* Cellular senescence is induced by the environmental neurotoxin  
558 paraquat and contributes to neuropathology linked to Parkinson's disease. *Cell*

- 559            *reports* **22**, 930-940 (2018).
- 560    42    Bae, S.-K. *et al.* Hypoxic induction of human visfatin gene is directly mediated by  
561            hypoxia-inducible factor-1. *FEBS letters* **580**, 4105-4113 (2006).
- 562    43    Kim, J.-w., Tchernyshyov, I., Semenza, G. L. & Dang, C. V. HIF-1-mediated expression  
563            of pyruvate dehydrogenase kinase: a metabolic switch required for cellular adaptation  
564            to hypoxia. *Cell metabolism* **3**, 177-185 (2006).
- 565    44    Shoshani, T. *et al.* Identification of a novel hypoxia-inducible factor 1-responsive gene,  
566            RTP801, involved in apoptosis. *Molecular and cellular biology* **22**, 2283-2293 (2002).
- 567    45    Jin, S. *et al.* Inference and analysis of cell-cell communication using CellChat. *Nature*  
568            *communications* **12**, 1-20 (2021).
- 569    46    Yuan, L. *et al.* Single - cell transcriptome analysis of human oocyte ageing. *Journal of*  
570            *Cellular and Molecular Medicine* (2021).
- 571    47    Alberico, H. C. & Woods, D. C. Role of Granulosa Cells in the Aging Ovarian Landscape:  
572            A Focus on Mitochondrial and Metabolic Function. *Front Physiol* **12**, 800739,  
573            doi:10.3389/fphys.2021.800739 (2021).
- 574    48    Katsuno-Kambe, H., Teo, J. L., Ju, R. J., Hudson, J. & Stehbens, S. J. Collagen  
575            polarization promotes epithelial elongation by stimulating locoregional cell  
576            proliferation. *Elife* **10**, e67915 (2021).
- 577    49    Han, S. & Roman, J. Fibronectin induces cell proliferation and inhibits apoptosis in  
578            human bronchial epithelial cells: pro-oncogenic effects mediated by PI3-kinase and  
579            NF- $\kappa$ B. *Oncogene* **25**, 4341-4349 (2006).
- 580    50    Machlin, J. H. *et al.* Fibroinflammatory Signatures Increase with Age in the Human  
581            Ovary and Follicular Fluid. *International journal of molecular sciences* **22**, 4902 (2021).
- 582    51    Orisaka, M. *et al.* The role of pituitary gonadotropins and intraovarian regulators in  
583            follicle development: A mini - review. *Reproductive Medicine and Biology* **20**, 169-175  
584            (2021).
- 585    52    Whyte, W. A. *et al.* Master transcription factors and mediator establish super-  
586            enhancers at key cell identity genes. *Cell* **153**, 307-319 (2013).
- 587    53    Pangas, S. A. & Rajkovic, A. Transcriptional regulation of early oogenesis: in search of  
588            masters. *Human Reproduction Update* **12**, 65-76 (2006).
- 589    54    Parker, K. L. & Schimmer, B. P. Steroidogenic factor 1: a key determinant of endocrine  
590            development and function. *Endocrine reviews* **18**, 361-377 (1997).
- 591    55    Felizola, S. J. *et al.* Estrogen-related receptor  $\alpha$  in normal adrenal cortex and  
592            adrenocortical tumors: involvement in development and oncogenesis. *Molecular and*  
593            *cellular endocrinology* **365**, 207-211 (2013).
- 594    56    De Val, S. & Black, B. L. Transcriptional control of endothelial cell development.  
595            *Developmental cell* **16**, 180-195 (2009).
- 596    57    Gallant, S. & Gilkeson, G. ETS transcription factors and regulation of immunity.  
597            *Archivum immunologiae et therapeuticae experimentalis* **54**, 149-163 (2006).
- 598    58    Hirschi, K. K. Hemogenic endothelium during development and beyond. *Blood* **119**,  
599            4823-4827 (2012).
- 600    59    Pliner, H. A. *et al.* Cicero predicts cis-regulatory DNA interactions from single-cell  
601            chromatin accessibility data. *Molecular cell* **71**, 858-871. e858 (2018).
- 602    60    Moore, J. E. *et al.* Expanded encyclopaedias of DNA elements in the human and mouse  
603            genomes. *Nature* **583**, 699-710 (2020).
- 604    61    de Leeuw, C. A., Mooij, J. M., Heskes, T. & Posthuma, D. MAGMA: generalized gene-  
605            set analysis of GWAS data. *PLoS computational biology* **11**, e1004219 (2015).
- 606    62    Skene, N. G. *et al.* Genetic identification of brain cell types underlying schizophrenia.  
607            *Nature genetics* **50**, 825-833 (2018).
- 608    63    Finucane, H. K. *et al.* Partitioning heritability by functional annotation using genome-  
609            wide association summary statistics. *Nature genetics* **47**, 1228-1235 (2015).

- 610 64 Hazeslip, L., Zafar, M. K., Chauhan, M. Z. & Byrd, A. K. Genome Maintenance by DNA  
611 Helicase B. *Genes* **11**, 578 (2020).  
612 65 Consortium, G. The Genotype-Tissue Expression (GTEx) pilot analysis: multitissue  
613 gene regulation in humans. *Science* **348**, 648-660 (2015).  
614 66 Lee, D. LS-GKM: a new gkm-SVM for large-scale datasets. *Bioinformatics* **32**, 2196-  
615 2198 (2016).  
616 67 Lee, D. *et al.* A method to predict the impact of regulatory variants from DNA  
617 sequence. *Nature genetics* **47**, 955-961 (2015).

618

619

620

621

622

623

624

625

626

627

628

629

630

631

632

633

## 634 **Methods**

### 635 **Sample procurement**

636 Fresh-frozen healthy human ovary samples were purchased from BioIVT  
637 (Baltimore, MD) and Cureline (Brisbane, CA). All samples were de-  
638 identified and the tissue source was anonymous to the researcher.

### 639 **Nuclear dissociation and library preparation**

640 For snATAC-seq, nuclei isolation was performed according to the 10×  
641 Genomics protocol CG000212 (Rev B) with ~100 mg frozen human ovary  
642 sample. Libraries were generated by using 10x Chromium Single Cell  
643 ATAC Reagent Kits (v1) and sequenced using the Illumina NextSeq 550  
644 platform with 150-bp paired-end sequencing.

645 For snRNA-seq, the nuclei isolation was performed according to 10×  
646 Genomics protocol CG000393 (Rev A) with ~100 mg frozen human ovary  
647 sample. Libraries were generated using 10x Chromium Single Cell 3'  
648 Reagent Kits (v3) and sequenced using the Illumina NextSeq 550 platform  
649 with 150-bp paired-end sequencing.

### 650 **Processing of snRNA-seq data**

651 Reads were aligned to a pre-mRNA GTF built on the GRCh38 genome  
652 using Cellranger (v3.1.0) to account for unspliced nuclear transcripts. The  
653 Cellranger function `aggr` was used to aggregate all snRNA-seq libraries  
654 without depth normalization to generate a gene by nucleus matrix. Nuclei  
655 with fewer than 200 genes, nuclei with more than 6000 genes, or nuclei  
656 with more than 15% of unique molecular identifiers stemming from  
657 mitochondrial genes were removed. In total, we obtained 42,568 nuclei for  
658 downstream analysis. Expression levels were normalized with the  
659 `LogNormalize` method in Seurat<sup>28</sup> (v4.0.4), and the top 2100 highly

660 variable genes (HVGs) were used for principal component analysis (PCA).  
661 To remove batch effects, the first 15 PCs were batch corrected using  
662 Harmony<sup>29</sup> (v0.1). Clustering was performed by constructing a K-nearest  
663 neighbor (KNN) graph with corrected PCs and applying the Louvain  
664 algorithm. Dimensional reduction was performed with Uniform Manifold  
665 Approximation and Projection (UMAP) and individual clusters were  
666 annotated based on expression of cell type-specific markers. Differentially  
667 expressed genes (DEGs) were identified with the Seurat FindMarkers  
668 function for genes detected in at least 25% of cells, using the MAST test  
669 and a log-fold-change threshold of 0.25. Bonferroni-adjusted p-values  
670 were used to determine significance at  $P_{\text{adj}} < 0.05$ . Gene ontology analysis  
671 was performed using Metascape<sup>35</sup>. Cell cycle score, apoptosis score, HIF  
672 pathway score, and cell identity score were evaluated by AddModuleScore  
673 function in Seurat with corresponding gene lists, respectively.

#### 674 **Processing of snATAC-seq data**

675 Reads were aligned to the GRCh38 genome using cellranger-atac (v2.0.0)  
676 Libraries were aggregated with cellranger-atac without depth  
677 normalization to generate a peak by nucleus matrix. Low-quality nuclei  
678 (peak region fragments < 200, peak region fragments > 10000, percentage  
679 of reads in peaks > 8, blacklist ratio < 0.01, TSS enrichment > 1.5 &  
680 nucleosome signal < 1.5) were removed using Signac<sup>30</sup> (v1.5.0). In total,  
681 we obtained 41,550 nuclei for downstream analysis. The peak by cell  
682 matrix was transformed using the term frequency-inverse document  
683 frequency (TF-IDF). Dimensional reduction was performed via singular  
684 value decomposition (SVD) of the TF-IDF matrix. The first 40 latent  
685 semantic indexing (LSI) components were batch corrected using Harmony  
686 (v0.1). Clustering was performed by constructing a K-nearest neighbor  
687 (KNN) graph with corrected LSI components and applying the Louvain

688 algorithm. Peak calling was performed with the CallPeaks function in  
689 MACS2<sup>68</sup> (v2.2.7.1) in each cluster. Gene activity was estimated by  
690 counting ATAC peaks within the gene body and 2 kb upstream of the TSS  
691 using protein-coding genes annotated in the Ensembl database. Canonical  
692 correlation analysis<sup>31</sup> (CCA) was used to capture the shared feature  
693 correlation structure between snATAC-seq gene activity and snRNA-seq  
694 gene expression. Mutual nearest neighbors<sup>31</sup> (MNNs) were then identified  
695 the pairs of corresponding cells that anchor the two datasets together. We  
696 assigned the cell types to the snATAC-seq clusters if the majority (>80%)  
697 of cells were aligned to the corresponding cell type. Differentially  
698 accessible chromatin regions (DARs) between cell types were assessed  
699 with the FindMarkers function for peaks detected in at least 5% of cells,  
700 using the MASTtest and a log-fold-change threshold of 0.25. Bonferroni-  
701 adjusted p-values were used to determine significance at  $P_{adj} < 0.05$ . The  
702 single-nuclei motif activity for a set of 452 human TFs from the JASPAR  
703 2020<sup>69</sup> was computed by running chromVAR (v1.14.0) through the  
704 RunChromVAR function in Signac. Differential motif activity between  
705 young and old ovaries in each cell type was identified by using the  
706 FindMarker function for chromVAR motifs detected in at least 25% of  
707 cells, using the MAST test and a log-fold-change threshold of 0.50.  
708 Bonferroni-adjusted p-values were used to determine significance at  
709  $P_{adj} < 0.05$ . To further analyze specific TFs of interest, we used the  
710 Footprint function in Signac to perform TF footprinting analysis.

### 711 **Gene set variation analysis (GSVA)**

712 Pathway analyses were performed on the 186 Kyoto Encyclopedia of  
713 Genes and Genomes (KEGG) pathways in the MSigDB<sup>70</sup> database (v7.4.1).  
714 GSVA<sup>37</sup> (v1.40.1) was used to perform gene set variation analysis to  
715 estimate the pathway activity score for individual cells. To compare the



716 pathway activity scores between young and old ovaries in each cell type,  
717 we contrasted the activity scores using the limma<sup>71</sup> package (v3.48.3).  
718 Bonferroni-adjusted p-values were used to determine significance at an  
719  $P_{\text{adj}} < 0.05$ . T-values of pathways that exhibited significance in at least 6  
720 cell types were visualized using heatmaps.

### 721 **Generation of cis-coaccessibility networks with Cicero**

722 We applied Cicero<sup>59</sup> (v1.3.4.11) to generate cis-accessibility networks  
723 (CCANs) for each cell type. Briefly, the Signac object for each cell type  
724 was converted to the CellDataSet format and then made into a Cicero  
725 object. The algorithm assigned the cells into many groups, each group  
726 comprised of 50 cells similarly positioned in clustering space. Graphical  
727 LASSO was used to calculate the correlations in adjusted accessibilities  
728 between all pairs of ATAC peaks within 500 kb. Finally, CCANs were  
729 identified through community detection.

### 730 **Transcription factor regulatory network construction.**

731 For a given TF, the ovarian ageing-associated DEGs whose promoters or  
732 putative enhancers contained both accessible peaks and motifs of the  
733 certain ageing-associated TFs within the peaks were defined as candidate  
734 targets of the selected TFs. We used this information to construct a directed  
735 TF regulatory network using the Gephi (v0.9.2).

### 736 **Cell type enrichment analysis**

737 For the snRNA-seq data, to estimate the association of gene-level GWAS  
738 trait association statistics with gene expression specificity in a given cell  
739 type, we used EWCE<sup>72</sup> (v1.0.0) to calculate gene expression specificity in  
740 each cell type. Then, MAGMA.Celltyping<sup>62</sup> (v1.0.0) was used to calculate  
741 the quantile groups for each cell type with the prepare.quantile.groups  
742 function. The GWAS variants were then annotated onto their neighbouring

743 genes (Genes were extended 10 kb upstream and 1.5 kb downstream).  
744 Finally, MAGMA<sup>61</sup> (v1.08) was used to test for a positive association (one-  
745 sided test) between the cell type specificity and the gene-level associations.  
746 *P*-values were used to determine significance at  $P < 0.05$ .

747 For the snATAC-seq data, we used ldsc<sup>63</sup> (v1.0.1) to annotate each variant  
748 according to whether or not it overlapped ATAC peaks in each cell type  
749 for each GWAS summary statistics. We then estimated partitioned LD  
750 scores with the annotated files, HapMap SNPs, and PLINK data  
751 corresponding to 1000 genomes phase 3. The baseline model was  
752 downloaded from ldsc website. Finally, we used stratified LD score  
753 regression to assess the contribution of an annotation to each GWAS trait  
754 heritability. *P*-values were used to determine significance at  $P < 0.05$ .

755 All GWAS summary statistics for age at menopause<sup>16,73,74</sup>, polycystic  
756 ovary syndrome (PCOS)<sup>75,76</sup>, and ovarian epithelial cancer (OEC)<sup>77-79</sup> were  
757 downloaded from GWAS Catalog (<https://www.ebi.ac.uk/gwas/>) or  
758 ReproGen (<https://www.reprogen.org/>), and re-formatted with  
759 MungeSumstats (v1.3.5) or munge\_sumstats.py in the ldsc package.

## 760 **The effect of variants on transcription factor binding activity**

761 To predict the TFs binding activity score, we overlapped our ovary ATAC  
762 peaks with human ovary tissue enhancer and promoter annotations from  
763 the ENCODE database. In this way, we obtained 71,470 putative enhancers  
764 and promoter regions, which were used as the positive set. We generated  
765 the random length and GC-matched genome sequences as the negative set.  
766 We then used the gkmtrain function from LS-GKM (v0.1.1)<sup>66</sup>, a new gkm-  
767 SVM software for large-scale datasets, to train the TFs binding model for  
768 human ovary with positive set, negative set, and “gkmrbf” kernel. For the  
769 variants of interest, we retrieved the  $\pm 25$  bp reference DNA sequence

770 around the variant. To generate the corresponding alternative DNA  
771 sequence, we replaced the 25th position with the effect allele. To compute  
772 deltaSVM scores, we generated all possible non-redundant k-mers of size  
773 11 and scored each of them using the trained model. We then used  
774 deltaSVM to compute the deltaSVM scores with k-mer scores, reference  
775 sequences, and alternative sequences. For the GkmExplain scores, we used  
776 GkmExplain<sup>80</sup> on the reference sequences or alternative sequences of  
777 variants of interest. The GkmExplain scores were visualized using  
778 logomaker (v0.8) (<https://github.com/jbkinney/logomaker>).

## 779 **Cellular communication**

780 To build cell-cell interactions between somatic cells and oocytes in young  
781 and old human ovaries, we used CellChat<sup>45</sup> (v1.1.3) to infer the cell-cell  
782 interactions based on the expression of known ligand-receptor pairs in  
783 different cell types with a combination of our snRNA-seq datasets and  
784 publicly available human oocyte single-cell RNA-seq datasets<sup>46</sup> from  
785 reproductive young and old females. Briefly, we inferred the cell-cell  
786 interactions for young and old ovaries, respectively. Next, we used  
787 “rankNet” function in CellChat to identify the significant outgoing or  
788 incoming signaling enriched in young or old ovaries.

## 789 ***In situ* hybridization assay**

790 Flash-frozen human ovary tissues were sectioned at 10  $\mu$ m. RNA in situ  
791 hybridization was performed using RNAscope Multiplex Fluorescent v2  
792 kits (Advanced Cell Diagnostics) according to the manufacturer’s  
793 instructions, except fixed with 4% PFA 90 mins at RT and protease IV  
794 incubation was performed for 15 min. Probes used were MT-ATP6  
795 (532961), RICTOR (544841), and CDKN1A (311401). Fluorophores used  
796 were Opal 690 (1:1500 dilution, Perkin Elmer). Images were taken on a

797 Leica TCS SP8 MP at  $\times 40$  magnification. 4-10 regions per sample were  
798 analyzed using HALO (v3.2). The mRNA expression levels were evaluated  
799 according to the ACD scoring system  
800 (<https://acdbio.com/dataanalysisguide>) by counting number of dots per cell.  
801 The cells with at least 4 dots were recognized as *CDKN1A*<sup>+</sup> cells.

## 802 **Reporting Summary**

803 Further information on research design is available in the Nature Research  
804 Reporting Summary linked to this article.

## 805 **Data availability**

806 The snRNA-seq and snATAC-seq data reported in this paper have been  
807 deposited in the Gene Expression Omnibus (GEO) under accession  
808 numbers: GSE202601. All other data supporting the findings of this study  
809 are available from the corresponding authors on reasonable request.

## 810 **Code availability**

811 The codes used to analyze the snRNA-seq and snATAC-seq data are  
812 available at [https://github.com/ChenJin2020/The-regulatory-landscapes-](https://github.com/ChenJin2020/The-regulatory-landscapes-of-human-ovarian-ageing)  
813 [of-human-ovarian-ageing](https://github.com/ChenJin2020/The-regulatory-landscapes-of-human-ovarian-ageing).

## 814 **Reference**

- 815 68 Zhang, Y. *et al.* Model-based analysis of ChIP-Seq (MACS). *Genome biology* **9**, 1-9  
816 (2008).
- 817 69 Fornes, O. *et al.* JASPAR 2020: update of the open-access database of transcription  
818 factor binding profiles. *Nucleic acids research* **48**, D87-D92 (2020).
- 819 70 Subramanian, A. *et al.* Gene set enrichment analysis: a knowledge-based approach for  
820 interpreting genome-wide expression profiles. *Proceedings of the National Academy*  
821 *of Sciences* **102**, 15545-15550 (2005).
- 822 71 Ritchie, M. E. *et al.* limma powers differential expression analyses for RNA-sequencing  
823 and microarray studies. *Nucleic acids research* **43**, e47-e47 (2015).
- 824 72 Skene, N. G. & Grant, S. G. Identification of vulnerable cell types in major brain  
825 disorders using single cell transcriptomes and expression weighted cell type  
826 enrichment. *Frontiers in neuroscience* **10**, 16 (2016).
- 827 73 Loh, P.-R., Kichaev, G., Gazal, S., Schoech, A. P. & Price, A. L. Mixed-model association  
828 for biobank-scale datasets. *Nature genetics* **50**, 906-908 (2018).

- 829 74 Backman, J. D. *et al.* Exome sequencing and analysis of 454,787 UK Biobank  
830 participants. *Nature* **599**, 628-634 (2021).
- 831 75 Day, F. *et al.* Large-scale genome-wide meta-analysis of polycystic ovary syndrome  
832 suggests shared genetic architecture for different diagnosis criteria. *PLoS genetics* **14**,  
833 e1007813 (2018).
- 834 76 Tyrmi, J. S. *et al.* Leveraging Northern European population history: novel low-  
835 frequency variants for polycystic ovary syndrome. *Human Reproduction* **37**, 352-365  
836 (2022).
- 837 77 Rashkin, S. R. *et al.* Pan-cancer study detects genetic risk variants and shared genetic  
838 basis in two large cohorts. *Nature communications* **11**, 1-14 (2020).
- 839 78 Phelan, C. M. *et al.* Identification of 12 new susceptibility loci for different histotypes  
840 of epithelial ovarian cancer. *Nature genetics* **49**, 680-691 (2017).
- 841 79 Jiang, L., Zheng, Z., Fang, H. & Yang, J. A generalized linear mixed model association  
842 tool for biobank-scale data. *Nature genetics* **53**, 1616-1621 (2021).
- 843 80 Shrikumar, A., Prakash, E. & Kundaje, A. GkmExplain: fast and accurate interpretation  
844 of nonlinear gapped k-mer SVMs. *Bioinformatics* **35**, i173-i182 (2019).

845

846

847

848

849

850

851

852

853

854

855

856

857

## 858 **Acknowledgments**

859 We thank Wilber Quispe (SingulOmics Corporation) for snRNA-seq and  
860 snATAC-seq libraries preparation and Columbia Genome Center for  
861 sequencing. This work was supported by NIH grants AG069750,  
862 DK127778, AG057433, AG061521, HL150521, AG055501, AG057341,  
863 AG057433, AG057706, AG057909, and AG17242 (Y.S), a grant GCRLE-  
864 1320 (Y. S.) from the Global Consortium for Reproductive Longevity and  
865 Equality at the Buck Institute, made possible by the Bia-Echo Foundation,  
866 and a grant from The Simons Foundation (Y.S.).

867

## 868 **Author information**

869 These authors contributed equally: Chen Jin, Xizhe Wang

## 870 **Affiliations**

871 Department of Obstetrics and Gynecology, Columbia University Medical  
872 Center, New York, NY

873 Chen Jin, Xizhe Wang, Adam Hudgins, Mingzhuo Pei, Seungsoo Kim, Daniela  
874 Contreras, Roger Lobo, Zev Williams & Yousin Suh

875 Howard Hughes Medical Institute, Department and School of Medicine,  
876 University of California, San Diego, La Jolla, CA, USA

877 Amir Gamliel, Michael Rosenfeld

878 Department Molecular Genetics, Erasmus University Medical Center  
879 Rotterdam, Rotterdam, The Netherlands

880 Jan Hoeijmakers

881 Princess Máxima Center for Pediatric Oncology, OncoCode Institute, Utrecht,

882 The Netherlands

883 Jan Hoeijmakers

884 Institute for Genome Stability in Ageing and Disease, Cologne Excellence

885 Cluster for Cellular Stress Responses in Aging-Associated Diseases

886 (CECAD), University Hospital of Cologne, Cologne, Germany Jan

887 Hoeijmakers

888 Buck Institute for Research on Aging, Novato, CA, USA

889 Judith Campisi

890 Lawrence Berkeley National Laboratory, Berkeley, CA, USA

891 Judith Campisi

892 Department of Genetics and Development, Columbia University Medical

893 Center, New York, NY

894 Yousin Suh

## 895 **Contributions**

896 C.J. designed and performed the experiments, analyzed the data, and wrote

897 the manuscript; X.W. performed the *in situ* hybridization assay, and

898 analyzed the imaging data; A.H. provided the analytic advice and revised

899 the manuscript; A.G. generated part of snRNA-seq libraries; M.P. assisted

900 the snRNA-seq data analysis; S.K. identified the LD SNPs and provided

901 the analytic advises; D.C. assisted the *in situ* hybridization assay; J.H. and

902 J.C. revised the manuscript; R.L, Z.W. and M.R. provided conceptual

903 advice; Y.S. conceived and designed the research, analyzed and interpreted

904 the data, and wrote the manuscript.

## 905 **Corresponding author**

906 Correspondence to Yousin Suh

907 **Ethics declarations**

908 **Competing interests**

909 The authors declare no competing interests

910

911 **Figure Legends**

912 **Fig.1: Single-nuclei transcriptomic and chromatin accessibility**  
913 **profiling of the human ovary**

914 **a**, Schematic representation of experimental methodology. **b**, UMAP plots  
915 of human ovary snRNA-seq dataset. **c**, Dot plot representing relative  
916 mRNA expression of selected known markers for each cell type. Dot size  
917 indicates the proportion of cells in the cluster expressing a gene, the  
918 shading indicates the relative level of expression (low to high reflected as  
919 light to dark). **d**, UMAP plots of human ovary snATAC-seq dataset. **e**, Dot  
920 plot representing relative gene activity of selected known markers for each  
921 cell type. Dot size indicates the proportion of cells in the cluster expressing  
922 a gene, the shading indicates the relative level of expression (low to high  
923 reflected as light to dark).

924 **Fig.2: Ageing alters ovarian cellular composition and affects the**  
925 **transcriptional activity of pathways involved in the hallmarks of**  
926 **ageing across cell types**

927 **a**, Bar plots represent the proportion of each cell type in young and aged  
928 ovaries estimated from snRNA-seq data. (Permutation test; Asterisk (\*)  
929 indicates  $FDR < 0.05$  and  $abs(\log_2FD) > 1.5$ ; Methods). **b**, Bar plots  
930 represent the proportion of each cell type in young and aged ovaries



931 estimated from snATAC-seq data. (Permutation test; Asterisk (\*) indicates  
932  $FDR < 0.05$  and  $\text{abs}(\log_2\text{FD}) > 1.5$ ). **c**, Heat map displaying  $\log_2$  fold  
933 changes in gene expression (aged vs. young) of human ovarian ageing-  
934 associated DEGs in each cell type. **d**, Heat map showing selected up- and  
935 down-regulated pathways significantly altered in at least 6 cell types during  
936 human ovarian ageing. Asterisk (\*) indicates a statistically significant  
937 difference ( $P_{\text{adj}} < 0.05$ ). **e**, Representative *in situ* hybridization (RNAscope)  
938 images from fresh-frozen human ovary tissue for *RICTOR* staining. **f**,  
939 Quantification of *RICTOR* expression in human ovary (young versus old).  
940  $n = 2$ ;  $*P < 0.05$ . **g**, Representative *in situ* hybridization (RNAscope)  
941 images from fresh-frozen human ovary tissue for *MT-ATP6* staining. **h**,  
942 Quantification of *MT-ATP6* expression in human ovary (young versus old).  
943  $n = 2$ ;  $**P < 0.01$ .

944 **Fig.3: Ageing increases signatures of cellular senescence and alters**  
945 **cellular communication in the ovary**

946 **a**, Bar plots represent the proportion of *CDKN1A*<sup>+</sup> for each cell type in  
947 young and aged ovaries. (Permutation test; Asterisk (\*) indicates  
948  $FDR < 0.05$  and  $\text{abs}(\log_2\text{FD}) > 1.5$ ). **b**, Representative *in situ* hybridization  
949 (RNAscope) images from fresh-frozen human ovary tissue for *CDKN1A*  
950 (p21) staining. **c**, Quantification of *CDKN1A* expression and the proportion  
951 of *CDKN1A*<sup>+</sup> cells in the human ovary (young versus old).  $n = 2$ ;  $*P < 0.05$ .  
952 **d**, Heat map displaying  $\log_2$  fold changes in gene expression (*CDKN1A*<sup>+</sup>  
953 vs. *CDKN1A*<sup>-</sup> cells) of selected SASP genes in each cell type. **e**, Violin  
954 plots showing the module score of HIF-1 pathway genes in *CDKN1A*<sup>+</sup> cells  
955 and *CDKN1A*<sup>-</sup> cells from each type. (Two-sided Wilcoxon test; NS: Not  
956 significant,  $*P < 0.05$ ,  $**P < 0.01$ ,  $***P < 0.001$ ,  $****P < 0.0001$ ). **f**, Heat map  
957 of the differential number of interactions between cell types in young and  
958 aged ovaries. The top bar plots represent the sum of each column of values

959 displayed in the heatmap (incoming signaling). The right bar plots  
960 represent the sum of each row of values (outgoing signaling). **g**, Heat map  
961 showing the outgoing and incoming signaling pathways that were  
962 significantly enriched in young or aged ovaries for each cell type.

963

964 **Fig.4: Cell type-specific TF regulatory networks implicate CEBPD as**  
965 **an important regulator of ageing-associated gene expression in the**  
966 **human ovary**

967 **a**, Heat map showing the average chromVAR motif activity for each cell  
968 type. **b**, UMAP plots displaying the chromVAR motif activity of selected  
969 cell type-specific TFs. **c**, Heat map showing the TFs with significant  
970 changes in chromVAR motif activity in each cell type during ovarian  
971 ageing. **d**, Split violin plots showing the expression levels of *CEBPD* in  
972 each cell type from young and aged ovaries. (MAST test;  $*P_{adj} < 0.05$ ). **e-j**,  
973 TF regulatory network plots showing the top regulators of ageing-  
974 associated DEGs in each cell type.

975 **Fig.5: Integration of ANM GWAS, single-nuclei multi-omics, and**  
976 **machine-learning nominates causal variants and gene targets**  
977 **associated with human ovarian ageing**

978 **a**, Heat map of enrichment significance of ovary-relevant trait GWAS  
979 variants in ovary cell type gene expression signatures. **b**, Heat map of  
980 enrichment significance of ovary-relevant trait GWAS variants in ovary  
981 cell type-specific chromatin accessibility. **c**, Upset plot showing the  
982 intersection size between sets of ANM-associated variants that overlap  
983 with transcriptional regulatory elements found in each cell type. The bar  
984 plot on the left shows the set size of variants for each cell type, and the bar  
985 plot on the top shows the number of overlapping variants shared by two or

986 more sets, or the number of unique variants in one set. **d**, Cis-regulatory  
987 architecture at the *HELB* gene in each cell type. The snATAC-seq tracks  
988 represent the aggregate signals of all cells from a given cell type. The co-  
989 accessible peaks inferred by Cicero for each cell type are shown. **e**, The  
990 gkm-SVM importance score for each base within the  $\pm 25$ -base pair (bp)  
991 region surrounding rs3741605. **f**, The eQTL effect of rs3741605 on *HELB*  
992 expression in human ovary tissue from the GTEx database. **g**, Cis-  
993 regulatory architecture at the *DEPTOR* gene in each cell type. The  
994 snATAC-seq tracks represent the aggregate signals of all cells from a given  
995 cell type. The co-accessible peaks inferred by Cicero for each cell type are  
996 shown. **h**, The gkm-SVM importance score for each base within the  $\pm 25$ -  
997 base pair (bp) region surrounding rs13263296. **i**, The eQTL effect of  
998 rs13263296 on *DEPTOR* expression in human ovary tissue from the GTEx  
999 database.

1000

1001

**Fig.1**

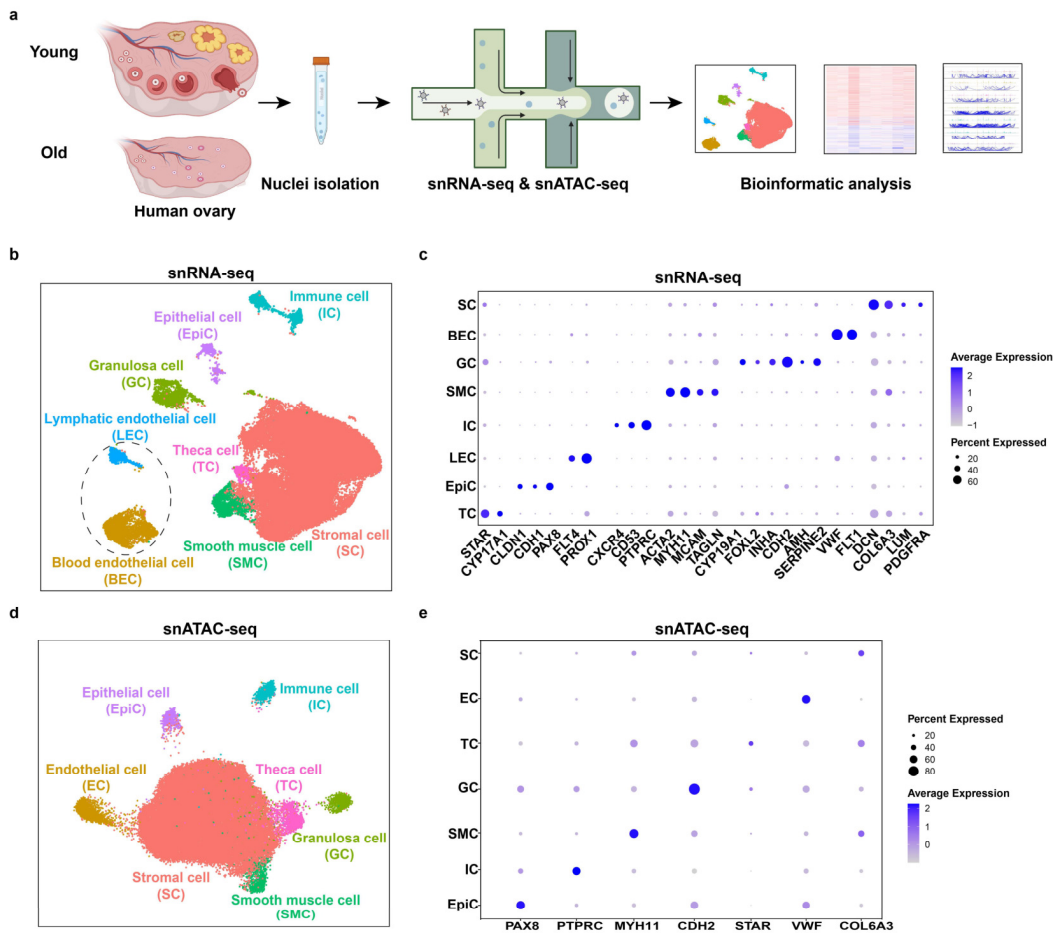

**Fig.1: Single-nuclei transcriptomic and chromatin accessibility profiling of the human ovary**

**a**, Schematic representation of experimental methodology. **b**, UMAP plots of human ovary snRNA-seq dataset. **c**, Dot plot representing relative mRNA expression of selected known markers for each cell type. Dot size indicates the proportion of cells in the cluster expressing a gene, the shading indicates the relative level of expression (low to high reflected as light to dark). **d**, UMAP plots of human ovary snATAC-seq dataset. **e**, Dot plot representing relative gene activity of selected known markers for each cell type. Dot size indicates the proportion of cells in the cluster expressing a gene, the shading indicates the relative level of expression (low to high reflected as light to dark).

**Fig.2**

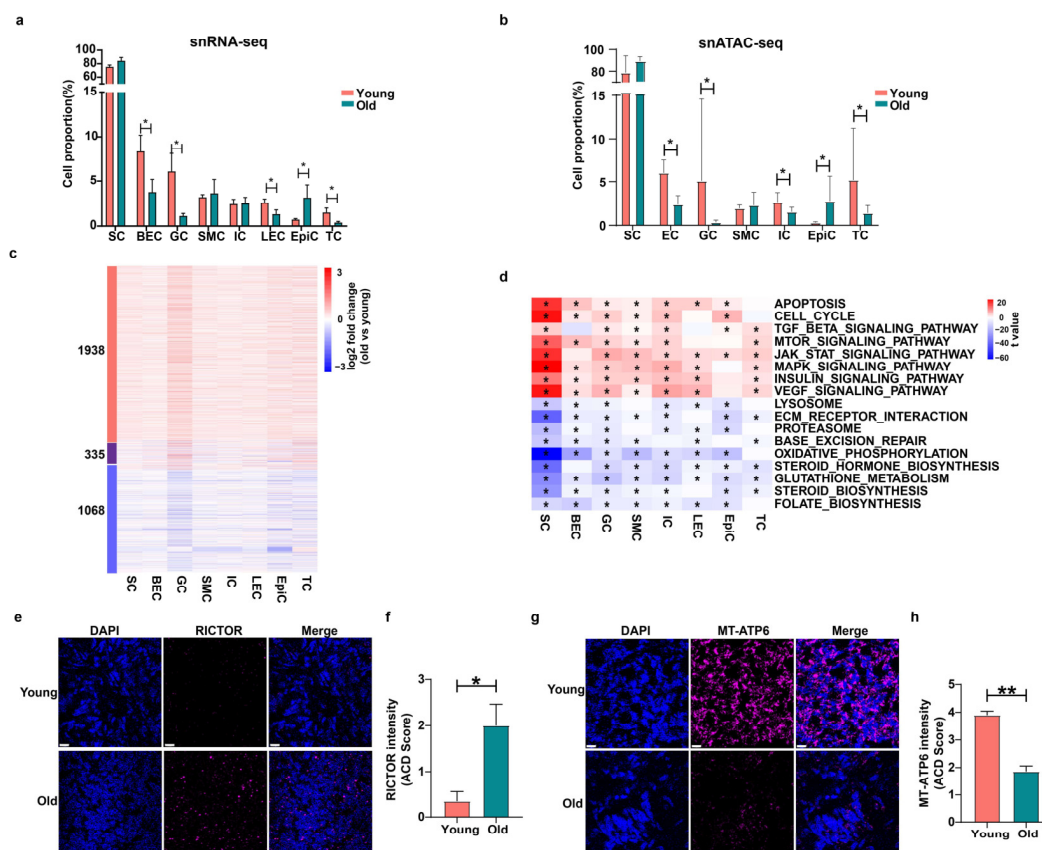

**Fig.2: Ageing alters ovarian cellular composition and affects the transcriptional activity of pathways involved in the hallmarks of ageing across cell types**

**a**, Bar plots represent the proportion of each cell type in young and aged ovaries estimated from snRNA-seq data. (Mean±SE; Permutation test; Asterisk (\*) indicates  $FDR < 0.05$  and  $abs(\log_2FD) > 1.5$ ; Methods). **b**, Bar plots represent the proportion of each cell type in young and aged ovaries estimated from snATAC-seq data. (Mean±SE; Permutation test; Asterisk (\*) indicates  $FDR < 0.05$  and  $abs(\log_2FD) > 1.5$ ). **c**, Heat map displaying  $\log_2$  fold changes in gene expression (aged vs. young) of human ovarian ageing-associated DEGs in each cell type. **d**, Heat map showing selected up- and down-regulated pathways significantly altered in at least 6 cell types during human ovarian ageing. Asterisk (\*) indicates a statistically

significant difference ( $P_{\text{adj}} < 0.05$ ). **e**, Representative *in situ* hybridization (RNAscope) images from fresh-frozen human ovary tissue for *RICTOR* staining. **f**, Quantification of *RICTOR* expression in human ovary (young versus old). Mean $\pm$ SE; n = 2; \* $P < 0.05$ . **g**, Representative *in situ* hybridization (RNAscope) images from fresh-frozen human ovary tissue for *MT-ATP6* staining. **h**, Quantification of *MT-ATP6* expression in human ovary (young versus old). Mean $\pm$ SE; n = 2; \*\* $P < 0.01$ .

**Fig.3**

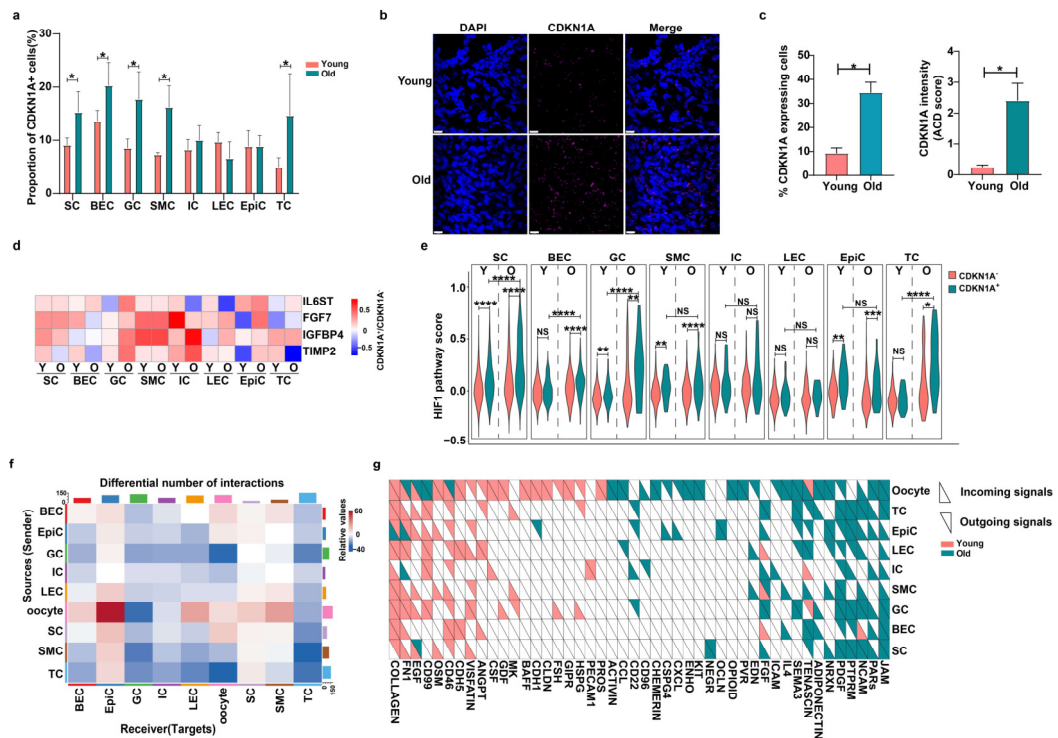

**Fig.3: Aging increases signatures of cellular senescence and alters cellular communication in the ovary**

**a**, Bar plots represent the proportion of  $CDKN1A^+$  cells for each cell type in young and aged ovaries. (Mean $\pm$ SE; Permutation test; Asterisk (\*) indicates  $FDR < 0.05$  and  $abs(\log_2FD) > 1.5$ ). **b**, Representative *in situ* hybridization (RNAscope) images from fresh-frozen human ovary tissue for  $CDKN1A$  (p21) staining. **c**, Quantification of  $CDKN1A$  expression and the proportion of  $CDKN1A^+$  cells in the human ovary (young versus old). Mean $\pm$ SE; n = 2; \* $P < 0.05$ . **d**, Heat map displaying  $\log_2$  fold changes in gene expression ( $CDKN1A^+$  vs.  $CDKN1A^-$  cells) of selected SASP genes in each cell type. **e**, Violin plots showing the module score of HIF-1 pathway genes in  $CDKN1A^+$  cells and  $CDKN1A^-$  cells from each type. (Two-sided Wilcoxon test; NS: Not significant, \* $P < 0.05$ , \*\* $P < 0.01$ , \*\*\* $P < 0.001$ , \*\*\*\* $P < 0.0001$ ). **f**, Heat map of the differential number of interactions between cell types in young and aged ovaries. The top bar plots

represent the sum of each column of values displayed in the heatmap (incoming signaling). The right bar plots represent the sum of each row of values (outgoing signaling). **g**, Heat map showing the outgoing and incoming signaling pathways significantly enriched in young or aged ovaries for each cell type.



**Fig.4**

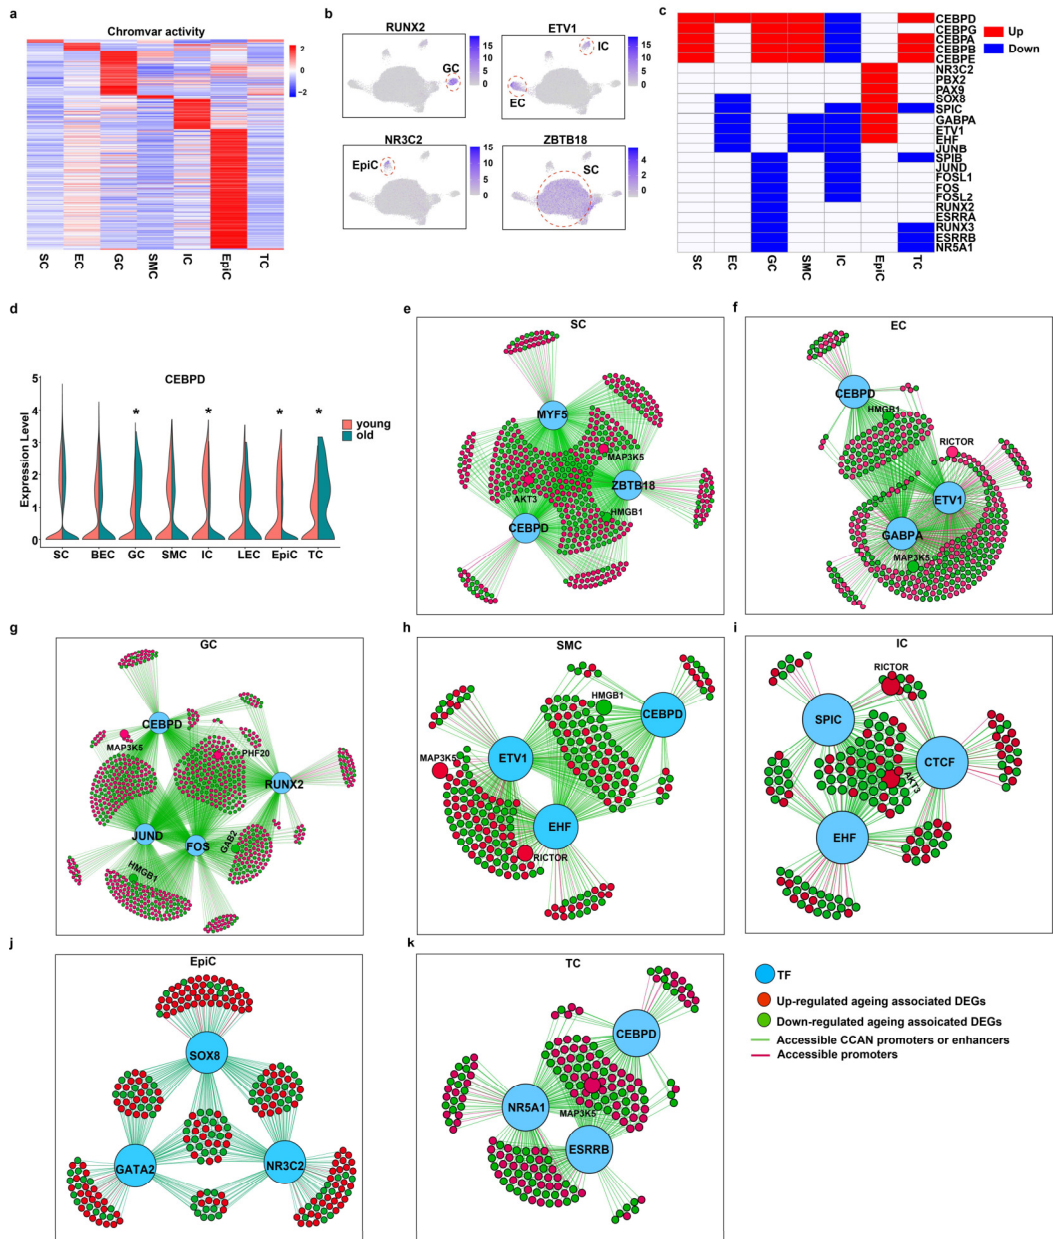

**Fig.4: Cell type-specific TF regulatory networks implicate CEBPD as an important regulator of ageing-associated gene expression in the human ovary**

**a**, Heat map showing the average chromVAR motif activity for each cell

type. **b**, UMAP plots displaying the chromVAR motif activity of selected cell type-specific TFs. **c**, Heat map showing the TFs with significant changes in chromVAR motif activity in each cell type during ovarian ageing. **d**, Split violin plots showing the expression levels of *CEBPD* in each cell type from young and aged ovaries. (MAST test;  $*P_{\text{adj}} < 0.05$ ). **e-j**, TF regulatory network plots showing the top regulators of ageing-associated DEGs in each cell type.

**Fig.5**

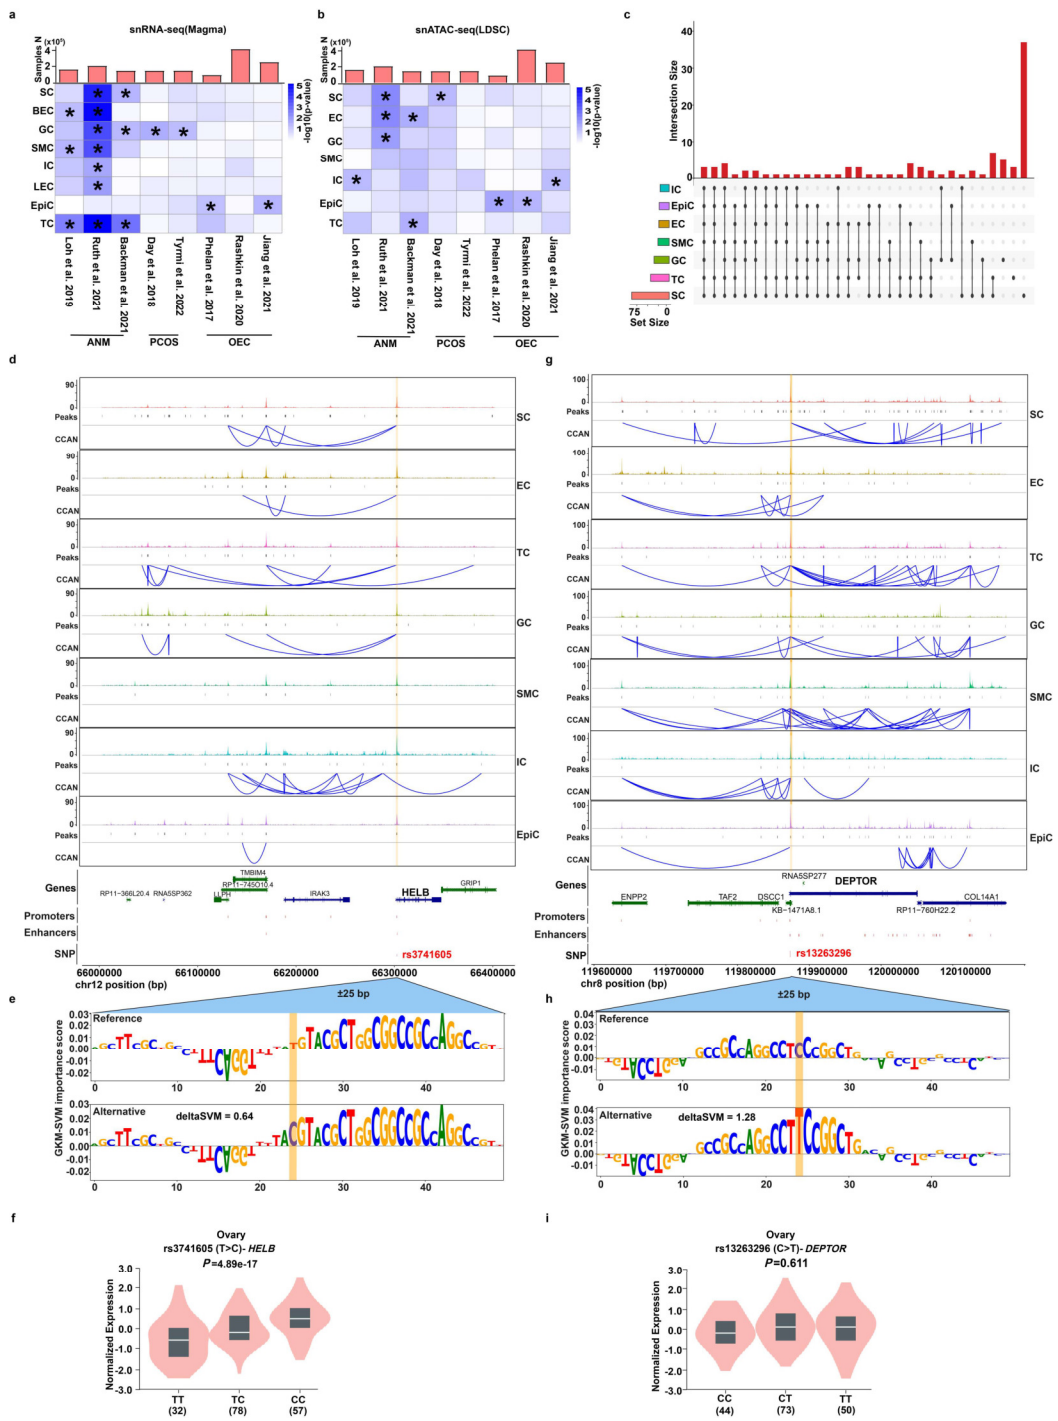

**Fig.5: Integration of ANM GWAS, single-nuclei multi-omics, and machine-learning nominates causal variants and gene targets associated with human ovarian aging**

a, Heat map of enrichment significance of ovary-relevant trait GWAS

variants in ovary cell type gene expression signatures. **b**, Heat map of enrichment significance of ovary-relevant trait GWAS variants in ovary cell type-specific chromatin accessibility. **c**, Upset plot showing the intersection size between sets of ANM-associated SNPs that overlap with transcriptional regulatory elements found in each cell type. The bar plot on the left shows the set size of variants for each cell type, and the bar plot on the top shows the number of overlapping SNPs shared by two or more sets, or the number of unique variants in one set. **d**, Cis-regulatory architecture at the *HELB* gene in each cell type. The snATAC-seq tracks represent the aggregate signals of all cells from a given cell type. The co-accessible peaks inferred by Cicero for each cell type are shown. **e**, The gkm-SVM importance score for each base within the  $\pm 25$ -base pair (bp) region surrounding rs3741605. **f**, The eQTL effect of rs3741605 on *HELB* expression in human ovary tissue from the GTEx database. **g**, Cis-regulatory architecture at the *DEPTOR* gene in each cell type. The snATAC-seq tracks represent the aggregate signals of all cells from a given cell type. The co-accessible peaks inferred by Cicero for each cell type are shown. **h**, The gkm-SVM importance score for each base within the  $\pm 25$ -base pair (bp) region surrounding rs13263296. **i**, The eQTL effect of rs13263296 on *DEPTOR* expression in human ovary tissue from the GTEx database.
