# Supplementary material for: The regulatory landscapes of human ovarian ageing
Source: bioRxiv preprint, doi:10.1101/2022.05.18.492547, version 1 (2022-05-19)
Supplement: Supplemental Tables [file 492547_file03.xlsx]

## Sheet: Contents
Supplementary Tables for "The regulatory landscapes of human ovarian ageing"
Table	Title and description
Supplementary Table 1	Human ovary sample information
Supplementary Table 2	Cell type-associated differentially expressed genes (DEGs)
Supplementary Table 3	Cell type-associated differentially accessible chromatin regions (DARs)
Supplementary Table 4	Ageing-associated differentially expressed genes (DEGs)
Supplementary Table 5	HIF-1 pathway-related DEGs that were up-regulated in CDKN1A+ cells
Supplementary Table 6	Differentially activated chromVAR motifs in each cell type
Supplementary Table 7	Ageing associated differentially activated chromVAR motifs
Supplementary Table 8	ANM-associated variants
Supplementary Table 9	ANM-associated variants overlapped with putative regulatory elements
Supplementary Table 10	GWAS summary statistics of selected ANM-associated variants from Ruth et al. Nature 2021

## Sheet: ST1
Supplementary Table 1. Human ovary sample information
ID	Status	Age	Application
ovary1	Healthy	23	snRNA-seq, snATAC-seq
ovary2	Healthy	27	snRNA-seq, snATAC-seq, RNAscope
ovary3	Healthy	28	snRNA-seq, snATAC-seq, RNAscope
ovary4	Healthy	29	snRNA-seq, snATAC-seq
ovary5	Healthy	49	snRNA-seq, snATAC-seq, RNAscope
ovary6	Healthy	51	snRNA-seq, snATAC-seq
ovary7	Healthy	52	snRNA-seq, snATAC-seq
ovary8	Healthy	54	snRNA-seq, snATAC-seq, RNAscope

## Sheet: ST2
Supplementary Table 2. Cell type-associated differentially expressed genes (DEGs)
avg_log2FC: the Log2 fold change of average expression in the current cluster against the rest of clusters. pct.1: the percentage of cells which express the marker gene in the current cluster. pct.2: the percentage of cells which express the marker gene in the rest of the clusters. cluster: cluster ID. gene: gene symbol. p_val: P value; p_val_adj: Bonferroni-adjusted p-value.
gene	p_val	avg_log2FC	pct.1	pct.2	p_val_adj	cluster
LAMA2	0	2.41459	0.784	0.404	0	SC
KAZN	0	2.14638	0.51	0.33	0	SC
MUM1L1	0	1.90797	0.577	0.244	0	SC
DLGAP1	0	1.89255	0.369	0.198	0	SC
BNC2	0	1.85935	0.88	0.618	0	SC
RAD51B	0	1.84925	0.721	0.611	0	SC
PLXNA4	0	1.71836	0.327	0.134	0	SC
COL6A3	0	1.69722	0.585	0.255	0	SC
TENM4	0	1.64899	0.555	0.227	0	SC
ALDH7A1	0	1.64704	0.473	0.3	0	SC
PBX3	0	1.64235	0.69	0.432	0	SC
NEGR1	0	1.6142	0.411	0.22	0	SC
BICC1	0	1.57232	0.604	0.32	0	SC
NAV3	0	1.55712	0.758	0.45	0	SC
GREB1	0	1.55581	0.782	0.57	0	SC
MCC	0	1.54636	0.79	0.602	0	SC
CLSTN2	0	1.5137	0.467	0.298	0	SC
DCN	0	1.50629	0.728	0.482	0	SC
NLGN4X	0	1.50567	0.431	0.192	0	SC
LONRF2	0	1.50437	0.379	0.218	0	SC
MAMDC2	0	1.43647	0.512	0.4	0	SC
ADAMTS16	0	1.42634	0.324	0.143	0	SC
C7	0	1.41745	0.52	0.328	0	SC
COL12A1	0	1.38188	0.425	0.178	0	SC
SCN7A	0	1.36663	0.413	0.143	0	SC
AFF3	0	1.33943	0.595	0.361	0	SC
MIR99AHG	0	1.3349	0.875	0.721	0	SC
CFH	0	1.3236	0.549	0.357	0	SC
MITF	0	1.311	0.496	0.312	0	SC
GALNT17	0	1.30178	0.437	0.229	0	SC
MAPK10	0	1.29071	0.473	0.295	0	SC
IGFBP5	0	1.28353	0.565	0.405	0	SC
KCNT2	0	1.26979	0.587	0.397	0	SC
PDGFD	0	1.26888	0.474	0.344	0	SC
SLC24A3	0	1.25105	0.37	0.141	0	SC
CMYA5	0	1.24284	0.383	0.184	0	SC
TGFBR3	0	1.22448	0.688	0.59	0	SC
MEIS1	0	1.19937	0.465	0.226	0	SC
GRK5	0	1.18444	0.582	0.479	0	SC
MOB3B	0	1.16704	0.436	0.27	0	SC
ZFPM2	0	1.16565	0.854	0.688	0	SC
EHBP1	0	1.135	0.7	0.582	0	SC
CACNB2	0	1.13071	0.561	0.374	0	SC
VLDLR-AS1	0	1.12183	0.317	0.162	0	SC
CPED1	0	1.06395	0.533	0.329	0	SC
DLG2	0	1.06068	0.567	0.454	0	SC
C1S	0	1.0444	0.482	0.319	0	SC
NR2F2-AS1	0	0.99144	0.67	0.424	0	SC
CALD1	0	0.95645	0.861	0.71	0	SC
CELF2	0	0.946002	0.711	0.445	0	SC
SYTL4	0	0.939025	0.447	0.315	0	SC
ARHGAP10	0	0.920694	0.669	0.475	0	SC
SMC5	0	0.910931	0.579	0.529	0	SC
PARD3	0	0.885439	0.824	0.7	0	SC
RORA	0	0.86735	0.689	0.632	0	SC
ADAMTS9-AS2	0	0.867214	0.824	0.643	0	SC
MORF4L2	0	0.857072	0.565	0.489	0	SC
NFIA	0	0.827291	0.726	0.627	0	SC
SVIL	0	0.757386	0.634	0.582	0	SC
FNDC3B	0	0.687443	0.812	0.833	0	SC
CUX1	0	0.661307	0.638	0.672	0	SC
ZBTB16	0	0.644768	0.668	0.661	0	SC
MBNL2	0	0.611586	0.63	0.653	0	SC
STAT3	0	0.545243	0.56	0.621	0	SC
VPS13B	0	0.52831	0.669	0.68	0	SC
LSAMP	9.88131291682493e-324	1.3575	0.418	0.311	2.69908062323073e-319	SC
SLC7A2	8.34970941471707e-322	1.40129	0.465	0.261	2.28072312662997e-317	SC
GNA12	3.13632871980023e-320	0.86145	0.386	0.323	8.56688189813434e-316	SC
ARID1B	3.73540110174599e-317	0.463404	0.788	0.838	1.02032481094192e-312	SC
AASS	1.22215685328571e-315	1.06818	0.372	0.259	3.33832144474992e-311	SC
ABCA8	2.42845448589799e-315	0.915267	0.398	0.266	6.63332342823036e-311	SC
COL1A2	2.91848762327323e-314	0.978255	0.565	0.403	7.97184894297084e-310	SC
COL6A1	1.03692302990986e-313	0.954117	0.478	0.32	0	SC
SMOC2	5.01371202053385e-313	1.13362	0.368	0.201	0	SC
MEG3	2.17183878208891e-312	1.34936	0.396	0.19	5.93238e-308	SC
BICD1	2.04945e-307	0.723755	0.569	0.558	5.59808e-303	SC
PLCXD3	2.9047e-307	1.3299	0.442	0.252	7.9342e-303	SC
ESYT2	1.18123e-297	0.827737	0.53	0.561	3.22652e-293	SC
ADAMTS1	7.97516e-297	1.19844	0.451	0.263	2.17842e-292	SC
ECHDC2	2.13354e-296	0.751448	0.424	0.35	5.82777e-292	SC
TWIST2	3.70859e-296	1.1449	0.315	0.126	1.013e-291	SC
ACSS3	4.01299e-295	0.86994	0.319	0.218	1.09615e-290	SC
AC026316.5	1.60531e-294	1.26196	0.336	0.168	4.38491e-290	SC
C1R	4.06103e-294	0.951012	0.388	0.254	1.10927e-289	SC
ATP1B3	4.25705e-292	1.23127	0.321	0.399	1.16281e-287	SC
RHOBTB3	1.13026e-290	0.807978	0.629	0.501	3.08731e-286	SC
ABCA10	7.15613e-290	0.95311	0.45	0.302	1.9547e-285	SC
NAALADL2	1.30324e-287	0.96006	0.451	0.383	3.5598e-283	SC
ZNF516	1.98673e-287	0.797947	0.485	0.403	5.42675e-283	SC
MAP3K5	5.51097e-287	0.862787	0.727	0.608	1.50532e-282	SC
ABCA6	8.20269e-281	0.894235	0.383	0.261	2.24056e-276	SC
CCNH	3.04949e-280	0.559435	0.455	0.538	8.32968e-276	SC
ANTXR1	4.12853e-278	0.959278	0.543	0.411	1.12771e-273	SC
SGK1	5.07179e-276	0.936717	0.402	0.318	1.38536e-271	SC
RALGAPA1	1.12683e-271	0.436284	0.566	0.595	3.07794e-267	SC
OSBPL9	6.25565e-271	0.448129	0.484	0.529	1.70873e-266	SC
SLC25A17	9.46269e-270	0.812387	0.302	0.22	2.58473e-265	SC
TRHDE	1.78921e-267	1.14141	0.251	0.089	4.88723e-263	SC
PTPN13	1.36954e-266	0.838845	0.379	0.268	3.74091e-262	SC
ROR2	8.93207e-266	1.06183	0.399	0.216	2.43979e-261	SC
SPART	1.7449e-264	0.596869	0.398	0.369	4.7662e-260	SC
MKL1	5.80385e-264	0.43902	0.535	0.609	1.58532e-259	SC
SYNPO2	1.4289e-261	0.971869	0.496	0.295	3.90303e-257	SC
ATXN10	1.62102e-261	0.395531	0.422	0.478	4.42782e-257	SC
DDR2	2.31732e-261	0.786638	0.35	0.275	6.32977e-257	SC
STK3	1.14788e-260	0.446349	0.645	0.663	3.13544e-256	SC
FTO	2.50509e-260	0.324643	0.519	0.606	6.84265e-256	SC
CDK14	5.30879e-260	0.636726	0.564	0.51	1.4501e-255	SC
LRP1	7.84879e-257	0.824344	0.325	0.195	2.1439e-252	SC
RPL18	2.11086e-256	0.697474	0.531	0.529	5.76581e-252	SC
NLGN1	5.12642e-256	1.37755	0.314	0.146	1.40028e-251	SC
MUC20-OT1	1.80261e-255	0.341258	0.469	0.531	4.92384e-251	SC
CHD1	3.24942e-255	0.543178	0.388	0.442	8.87579e-251	SC
ANTXR2	9.66604e-255	0.705395	0.405	0.354	2.64028e-250	SC
CPSF6	1.03925e-253	0.360525	0.453	0.502	2.8387e-249	SC
ITM2B	1.20819e-253	0.523165	0.555	0.558	3.30018e-249	SC
GLI2	4.29768e-253	0.932654	0.327	0.158	1.17391e-248	SC
JUND	1.35151e-252	0.589641	0.567	0.575	3.69166e-248	SC
MNAT1	6.81198e-252	0.419459	0.388	0.43	1.86069e-247	SC
CEBPD	1.58761e-251	0.630589	0.499	0.481	4.33656e-247	SC
SOX5	2.33942e-251	0.623747	0.733	0.572	6.39014e-247	SC
PRDM2	4.48818e-251	0.508068	0.405	0.412	1.22595e-246	SC
ARIH1	8.33398e-250	0.350517	0.55	0.619	2.27643e-245	SC
EPS8	4.51017e-249	0.728159	0.684	0.586	1.23195e-244	SC
TCF7L2	9.74876e-249	0.610282	0.569	0.563	2.66287e-244	SC
SH3D19	2.74012e-248	0.621625	0.574	0.552	7.48463e-244	SC
IGFBP4	3.3329e-248	0.86758	0.472	0.39	9.10381e-244	SC
TFDP2	5.14159e-248	0.416793	0.424	0.479	1.40443e-243	SC
SND1	5.00484e-247	0.326499	0.409	0.504	1.36707e-242	SC
STXBP5L	1.03108e-246	1.0833	0.257	0.121	2.8164e-242	SC
RPL13A	1.6956e-246	0.565827	0.647	0.661	4.63154e-242	SC
DYM	1.44979e-245	0.291545	0.507	0.582	3.96011e-241	SC
RPS8	2.32321e-245	0.639307	0.643	0.628	6.34586e-241	SC
CMSS1	5.38185e-245	0.648262	0.358	0.411	1.47005e-240	SC
TTC28	5.95107e-245	0.545991	0.749	0.756	1.62554e-240	SC
PPP2CB	2.20871e-244	0.49679	0.436	0.431	6.03308e-240	SC
TYW1	4.27937e-243	0.627143	0.282	0.32	1.16891e-238	SC
TUT4	7.953e-243	0.35683	0.525	0.58	2.17236e-238	SC
CTNNA3	9.50537e-243	0.922808	0.407	0.371	2.59639e-238	SC
DENND4A	1.03306e-242	0.335716	0.48	0.543	2.82181e-238	SC
PLEKHA5	1.51433e-242	0.74464	0.621	0.563	4.1364e-238	SC
GATA6	2.3976e-242	0.874134	0.34	0.258	6.54903e-238	SC
TM9SF3	4.73357e-242	0.273866	0.323	0.399	1.29297e-237	SC
GLI3	8.37529e-242	0.728579	0.337	0.259	2.28771e-237	SC
FOXO3	1.05946e-241	0.680422	0.54	0.514	2.89392e-237	SC
RPL13	2.74118e-241	0.632857	0.831	0.823	7.48754e-237	SC
RPLP0	3.29783e-241	0.582703	0.47	0.492	9.00802e-237	SC
PLD1	4.75527e-241	0.545209	0.44	0.459	1.2989e-236	SC
CPQ	5.04936e-240	0.516891	0.435	0.442	1.37923e-235	SC
KLHDC8A	6.31648e-240	0.675482	0.293	0.249	1.72535e-235	SC
PDZRN3	1.19758e-239	0.882084	0.596	0.46	3.2712e-235	SC
GLG1	2.23017e-239	0.302443	0.453	0.529	6.09171e-235	SC
CDH11	2.39003e-239	0.836538	0.557	0.43	6.52838e-235	SC
ZNF704	8.27461e-239	0.655255	0.45	0.416	2.26021e-234	SC
PLA2R1	1.15714e-238	0.851464	0.29	0.161	3.16073e-234	SC
LARGE1	1.94278e-238	0.694502	0.502	0.439	5.3067e-234	SC
CAPZB	2.3354e-237	0.301056	0.479	0.551	6.37915e-233	SC
SCMH1	5.46642e-235	0.529806	0.459	0.46	1.49315e-230	SC
PTPRK	1.68156e-234	0.55901	0.596	0.621	4.59319e-230	SC
USP15	3.17167e-234	0.450535	0.502	0.572	8.66341e-230	SC
SMURF1	1.66808e-233	0.539109	0.419	0.415	4.55635e-229	SC
CASC15	9.91391e-233	0.804657	0.618	0.413	2.70798e-228	SC
PJA2	2.15918e-232	0.317518	0.326	0.386	5.8978e-228	SC
PPP6R3	2.51999e-232	0.270063	0.652	0.729	6.88337e-228	SC
RPS5	1.64653e-231	0.682442	0.427	0.416	4.49749e-227	SC
MEG8	3.92036e-231	1.4146	0.369	0.191	1.07085e-226	SC
RPS27	7.67896e-231	0.64258	0.385	0.368	2.09751e-226	SC
GRAMD2B	3.84345e-230	0.951907	0.399	0.287	1.04984e-225	SC
ZCCHC7	7.23742e-230	0.331636	0.526	0.609	1.9769e-225	SC
FBXO42	2.77152e-229	0.430201	0.398	0.427	7.57042e-225	SC
TLE4	2.83735e-229	0.428942	0.392	0.417	7.75022e-225	SC
ADAM17	3.21507e-228	0.291738	0.336	0.398	8.78195e-224	SC
SEC31A	2.33593e-227	0.351465	0.468	0.514	6.38059e-223	SC
LRCH3	2.88888e-227	0.269669	0.394	0.47	7.89098e-223	SC
DYNC2H1	1.26833e-226	0.544893	0.351	0.334	3.46443e-222	SC
CNTN1	1.76976e-226	1.02098	0.302	0.182	4.8341e-222	SC
TCEAL4	2.23093e-226	0.633791	0.37	0.346	6.09379e-222	SC
DAPK1	5.15223e-226	0.646864	0.565	0.54	1.40733e-221	SC
EEF2	5.28738e-226	0.466602	0.425	0.465	1.44425e-221	SC
PCSK5	5.57431e-226	1.01161	0.478	0.361	1.52262e-221	SC
MAP4K3	1.05041e-225	0.351774	0.545	0.595	2.86919e-221	SC
CASK	1.83899e-225	0.503984	0.435	0.478	5.0232e-221	SC
TIMP2	3.20727e-225	0.615363	0.484	0.456	8.76066e-221	SC
SPATA6	3.93867e-225	0.649719	0.339	0.282	1.07585e-220	SC
ATP9B	6.96383e-225	0.26551	0.394	0.474	1.90217e-220	SC
GPATCH8	2.03047e-224	0.29566	0.482	0.547	5.54622e-220	SC
TTC3	4.95143e-224	0.407959	0.51	0.575	1.35248e-219	SC
IMMP2L	9.41656e-224	0.544082	0.687	0.714	2.57213e-219	SC
B4GALT1	1.48483e-223	0.647608	0.361	0.323	4.05581e-219	SC
FLRT2	5.38585e-223	0.959272	0.605	0.509	1.47114e-218	SC
COA1	6.16801e-222	0.329777	0.296	0.35	1.68479e-217	SC
TMOD1	1.56562e-221	0.941411	0.294	0.155	4.27649e-217	SC
BEX3	2.135e-221	0.331203	0.284	0.365	5.83176e-217	SC
FNDC3A	2.53774e-221	0.2631	0.486	0.575	6.93183e-217	SC
H3F3B	8.32727e-221	0.50929	0.371	0.406	2.27459e-216	SC
RPS11	1.75238e-220	0.551458	0.492	0.505	4.78661e-216	SC
EIF4A2	5.83963e-220	0.255421	0.275	0.36	1.5951e-215	SC
PARVA	7.23191e-220	0.549718	0.366	0.349	1.9754e-215	SC
RPL28	3.50758e-219	0.457586	0.598	0.639	9.58097e-215	SC
COL6A2	6.66116e-219	0.764172	0.425	0.289	1.8195e-214	SC
ARMC9	7.06242e-219	0.56971	0.347	0.338	1.9291e-214	SC
EIF1	1.0573e-217	0.425698	0.408	0.478	2.88801e-213	SC
ST3GAL4	1.72276e-217	0.708571	0.279	0.23	4.70571e-213	SC
DENND5B	3.88072e-217	0.534269	0.454	0.458	1.06002e-212	SC
KIAA1328	5.16807e-217	0.571586	0.374	0.362	1.41166e-212	SC
BTRC	9.42271e-217	0.268886	0.382	0.457	2.57381e-212	SC
LDLRAD3	1.47497e-216	0.688574	0.373	0.344	4.02887e-212	SC
MYL6	3.65704e-216	0.320936	0.356	0.464	9.98921e-212	SC
UBAP1	7.45225e-216	0.426198	0.352	0.372	2.03558e-211	SC
CCNI	7.4919e-216	0.301656	0.379	0.45	2.04641e-211	SC
RPSA	1.38944e-215	0.47886	0.394	0.43	3.79524e-211	SC
NEK1	2.48901e-215	0.278271	0.309	0.377	6.79874e-211	SC
SH3PXD2B	2.67772e-215	0.691922	0.428	0.349	7.3142e-211	SC
HIVEP2	2.72371e-215	0.674565	0.508	0.483	7.43983e-211	SC
ATL2	3.94682e-215	0.424171	0.339	0.354	1.07808e-210	SC
MORF4L1	5.46065e-214	0.267663	0.368	0.441	1.49158e-209	SC
PGR	2.77139e-213	0.93116	0.28	0.209	7.57005e-209	SC
CBFA2T2	3.12725e-213	0.343592	0.324	0.374	8.54209e-209	SC
MICU1	3.58331e-213	0.260031	0.41	0.491	9.78781e-209	SC
RPS29	4.05326e-213	0.414686	0.349	0.416	1.10715e-208	SC
RBMS1	4.75544e-213	0.296211	0.56	0.654	1.29895e-208	SC
BNIP3L	2.39933e-212	0.468636	0.434	0.451	6.55376e-208	SC
RPL6	4.12207e-212	0.477691	0.462	0.505	1.12594e-207	SC
RPL37A	4.73897e-212	0.469047	0.502	0.543	1.29445e-207	SC
NUP98	6.84618e-212	0.251874	0.315	0.376	1.87003e-207	SC
COL5A2	7.2603e-212	0.84943	0.364	0.239	1.98315e-207	SC
SLC12A2	1.158e-211	0.938092	0.31	0.255	3.16308e-207	SC
SIK2	8.62385e-211	0.556349	0.451	0.467	2.35561e-206	SC
DANT2	4.63336e-210	0.3027	0.267	0.339	1.2656e-205	SC
NUCKS1	6.52892e-210	0.356034	0.395	0.448	1.78337e-205	SC
SGCE	8.82721e-210	0.277528	0.259	0.324	2.41115e-205	SC
SMG6	1.05835e-209	0.325676	0.37	0.424	2.89087e-205	SC
SSBP3	3.84918e-209	0.41839	0.473	0.5	1.0514e-204	SC
HIBADH	7.7063e-209	0.37837	0.248	0.288	2.10498e-204	SC
PID1	1.13765e-208	0.925135	0.364	0.255	3.10749e-204	SC
NFIC	1.43341e-208	0.540296	0.395	0.371	3.91535e-204	SC
RPS16	6.47931e-208	0.522938	0.387	0.41	1.76982e-203	SC
UBB	9.65527e-208	0.315722	0.222	0.312	2.63734e-203	SC
RYR2	1.28119e-207	1.10895	0.341	0.191	3.49958e-203	SC
MYL12A	2.49846e-207	0.253419	0.209	0.304	6.82453e-203	SC
LPIN1	8.78037e-207	0.720004	0.262	0.183	2.39836e-202	SC
SPAG9	1.75913e-206	0.283302	0.447	0.512	4.80506e-202	SC
PLEKHH2	2.54626e-206	0.687892	0.349	0.258	6.9551e-202	SC
PLA2G5	2.28091e-205	1.08517	0.334	0.17	6.23029e-201	SC
RB1CC1	2.46e-205	0.332374	0.419	0.47	6.7195e-201	SC
RPL35	2.94282e-205	0.427304	0.429	0.476	8.03832e-201	SC
SSBP2	4.1486e-205	0.582856	0.596	0.527	1.13319e-200	SC
C1orf21	1.64718e-204	0.861618	0.419	0.323	4.49926e-200	SC
TMSB4X	1.99314e-204	0.307345	0.518	0.662	5.44426e-200	SC
MIPOL1	2.03217e-204	0.499981	0.301	0.297	5.55087e-200	SC
PUM3	2.50523e-204	0.420934	0.289	0.315	6.84304e-200	SC
ZNF331	7.87746e-204	1.15446	0.292	0.182	2.15173e-199	SC
ZFP36L1	7.96716e-204	0.655352	0.537	0.488	2.17623e-199	SC
PRPS2	5.29835e-203	1.52734	0.28	0.172	1.44725e-198	SC
PPM1K	1.46372e-202	0.49648	0.321	0.315	3.99816e-198	SC
RAB8B	1.51869e-202	0.562256	0.343	0.317	4.14831e-198	SC
RPL27A	1.53428e-202	0.506963	0.398	0.445	4.19088e-198	SC
RPL5	2.10117e-202	0.466175	0.382	0.432	5.73934e-198	SC
RPS27A	3.08977e-202	0.565655	0.509	0.544	8.43971e-198	SC
TUSC3	3.55142e-202	0.522245	0.316	0.304	9.7007e-198	SC
NCALD	5.55152e-202	0.782311	0.411	0.325	1.5164e-197	SC
SERF2	1.52206e-201	0.314467	0.343	0.446	4.1575e-197	SC
RERG	2.10331e-201	1.09965	0.334	0.167	5.7452e-197	SC
RPS15	2.18466e-201	0.511924	0.572	0.598	5.96739e-197	SC
TTN-AS1	3.04102e-201	0.363026	0.287	0.334	8.30656e-197	SC
ACTB	3.33391e-201	0.351533	0.534	0.63	9.10657e-197	SC
UST	8.37817e-201	0.708882	0.453	0.388	2.2885e-196	SC
RPL3	1.9816e-200	0.549684	0.527	0.563	5.41275e-196	SC
ABL1	2.14874e-200	0.413807	0.394	0.438	5.86927e-196	SC
TXNRD1	3.17643e-200	0.548255	0.615	0.625	8.67642e-196	SC
CRISPLD2	8.83023e-199	1.14982	0.3	0.178	2.41198e-194	SC
RPL36	1.22601e-198	0.511821	0.518	0.552	3.34886e-194	SC
RPL15	2.10821e-198	0.629878	0.555	0.587	5.75858e-194	SC
HMGB1	5.16067e-198	0.278635	0.448	0.531	1.40964e-193	SC
AUH	7.17387e-198	0.291511	0.337	0.396	1.95954e-193	SC
ZNF90	1.92077e-197	0.541329	0.319	0.33	5.24659e-193	SC
RPS19	2.11947e-197	0.495924	0.616	0.65	5.78934e-193	SC
YWHAQ	6.1905e-197	0.288717	0.306	0.361	1.69094e-192	SC
MTA3	1.92562e-196	0.267834	0.36	0.43	5.25984e-192	SC
ANKRD28	3.01673e-196	0.453058	0.407	0.449	8.24019e-192	SC
PLEKHA7	3.73169e-196	0.34541	0.414	0.508	1.01931e-191	SC
KIAA1958	6.82295e-196	0.541117	0.42	0.415	1.86369e-191	SC
COL18A1	7.82938e-196	0.891018	0.338	0.213	2.1386e-191	SC
ANKRD13C	4.02878e-195	0.347545	0.26	0.298	1.10046e-190	SC
DEPTOR	9.07495e-195	0.821268	0.273	0.228	2.47882e-190	SC
HDAC4	1.01227e-194	0.371997	0.37	0.402	2.76501e-190	SC
BCKDHB	1.16623e-194	0.429631	0.327	0.353	3.18555e-190	SC
ZC3H6	1.26896e-194	0.250319	0.215	0.274	3.46618e-190	SC
QSER1	2.12488e-194	0.33339	0.269	0.321	5.80412e-190	SC
ARHGAP32	2.27106e-194	0.399956	0.367	0.394	6.20339e-190	SC
ATP5MG	2.4682e-194	0.304918	0.209	0.287	6.74188e-190	SC
RPL37	5.49701e-194	0.41413	0.363	0.409	1.50151e-189	SC
ALMS1	4.79711e-193	0.355102	0.297	0.326	1.31033e-188	SC
GLUL	8.35229e-193	0.797331	0.292	0.252	2.28143e-188	SC
ANXA5	1.18113e-192	0.287634	0.304	0.378	3.22625e-188	SC
STAT5B	1.47106e-192	0.329318	0.368	0.409	4.0182e-188	SC
NAP1L1	1.57068e-192	0.34395	0.388	0.425	4.29032e-188	SC
SH3RF1	1.66037e-192	0.606831	0.319	0.313	4.53531e-188	SC
TLN2	3.32966e-192	0.845061	0.293	0.261	9.09498e-188	SC
MAP3K20	4.44848e-192	0.510018	0.414	0.396	1.2151e-187	SC
STT3B	8.68022e-192	0.317269	0.353	0.414	2.371e-187	SC
PDE10A	8.83101e-192	1.3307	0.315	0.253	2.41219e-187	SC
PIK3CA	1.02178e-191	0.308078	0.374	0.427	2.79099e-187	SC
EXOC6B	1.04537e-191	0.255565	0.585	0.674	2.85543e-187	SC
COL1A1	4.59301e-191	0.991165	0.402	0.278	1.25458e-186	SC
TENT5A	5.42934e-191	0.756025	0.302	0.236	1.48303e-186	SC
RPL7A	1.13785e-190	0.523619	0.453	0.488	3.10803e-186	SC
RPS9	2.68934e-190	0.504344	0.517	0.567	7.34594e-186	SC
COL3A1	2.73125e-190	0.872078	0.364	0.277	7.46042e-186	SC
ZNF462	3.83131e-190	0.342205	0.315	0.359	1.04652e-185	SC
CRTC3	4.94261e-190	0.302888	0.368	0.42	1.35007e-185	SC
GLIS3	8.02986e-190	0.689679	0.569	0.409	2.19336e-185	SC
COL14A1	1.12865e-189	0.901198	0.279	0.143	3.08291e-185	SC
KDM4B	2.14414e-189	0.323224	0.339	0.378	5.85671e-185	SC
ARHGAP6	6.82666e-189	0.899157	0.461	0.368	1.8647e-184	SC
ZFAND5	1.20329e-188	0.525301	0.404	0.401	3.28678e-184	SC
RPS25	4.34375e-188	0.474197	0.367	0.408	1.1865e-183	SC
RPLP2	7.76346e-188	0.409153	0.373	0.423	2.12059e-183	SC
STIM1	8.88309e-187	0.59283	0.355	0.306	2.42642e-182	SC
SLC25A12	1.12493e-186	0.31635	0.227	0.263	3.07275e-182	SC
ATP5F1E	9.94154e-186	0.253605	0.207	0.295	2.71553e-181	SC
JMY	1.00823e-185	0.395449	0.282	0.306	2.75398e-181	SC
AHCYL1	1.52209e-185	0.547657	0.25	0.224	4.15759e-181	SC
HIST1H2AC	2.14774e-185	0.78528	0.295	0.243	5.86654e-181	SC
RPS20	2.49435e-185	0.422698	0.322	0.363	6.81331e-181	SC
RPS2	4.26874e-185	0.498899	0.459	0.503	1.16601e-180	SC
LGALS1	4.84815e-185	0.496147	0.339	0.357	1.32427e-180	SC
ELP2	6.50043e-185	0.430579	0.292	0.279	1.77559e-180	SC
LAPTM4A	6.66351e-185	0.347719	0.326	0.377	1.82014e-180	SC
SKP1	6.93931e-185	0.30627	0.242	0.302	1.89547e-180	SC
RFTN1	7.79739e-185	0.758631	0.329	0.222	2.12986e-180	SC
PBX1	3.5871e-184	0.654605	0.765	0.68	9.79817e-180	SC
XPO5	6.07512e-184	0.401686	0.329	0.385	1.65942e-179	SC
BAIAP2L1	7.90143e-184	0.448476	0.371	0.44	2.15828e-179	SC
UBA52	8.14093e-184	0.430759	0.354	0.396	2.2237e-179	SC
PEBP1	1.29553e-183	0.374775	0.254	0.308	3.53874e-179	SC
CHCHD2	1.44982e-183	0.388553	0.243	0.296	3.96018e-179	SC
EEF1D	1.60213e-183	0.272045	0.348	0.42	4.37622e-179	SC
ZBTB20	1.70463e-183	0.399396	0.877	0.9	4.6562e-179	SC
C9orf3	5.07132e-183	0.322325	0.589	0.647	1.38523e-178	SC
PAWR	1.07069e-182	0.393979	0.454	0.474	2.9246e-178	SC
STX18	1.13036e-182	0.342326	0.244	0.276	3.08759e-178	SC
FHL2	1.63394e-182	0.677536	0.556	0.474	4.46312e-178	SC
JUN	1.86978e-182	0.307133	0.336	0.406	5.10729e-178	SC
BACH2	3.38978e-182	0.783839	0.352	0.277	9.25919e-178	SC
KLF9	1.26406e-181	0.656483	0.329	0.26	3.45277e-177	SC
OOEP	1.47511e-181	0.468635	0.326	0.385	4.02927e-177	SC
TSHZ3	4.42673e-181	0.897367	0.291	0.165	1.20916e-176	SC
LUM	7.52037e-181	0.947149	0.271	0.18	2.05419e-176	SC
RPL8	1.35455e-180	0.490605	0.529	0.559	3.69995e-176	SC
SESN1	1.36749e-180	0.379659	0.352	0.378	3.7353e-176	SC
S100A6	1.55678e-180	0.388449	0.357	0.442	4.25234e-176	SC
COL5A1	2.57989e-179	0.743045	0.287	0.155	7.04697e-175	SC
RPS3	5.56466e-179	0.605054	0.556	0.58	1.51999e-174	SC
RPS6	2.15771e-178	0.507012	0.505	0.54	5.89378e-174	SC
TMED10	2.42643e-178	0.330961	0.241	0.283	6.6278e-174	SC
SOCS5	9.80746e-178	0.34817	0.237	0.277	2.67891e-173	SC
APOC1	1.98337e-177	0.463646	0.28	0.353	5.41758e-173	SC
NID1	1.99194e-177	0.771863	0.4	0.267	5.44098e-173	SC
NR4A1	3.23861e-177	0.746069	0.349	0.303	8.84627e-173	SC
RPS12	1.46536e-176	0.508218	0.413	0.453	4.00264e-172	SC
SMIM14	1.69508e-176	0.300903	0.208	0.252	4.63012e-172	SC
NACA	3.9612e-176	0.412823	0.363	0.416	1.082e-171	SC
SLC25A6	8.58831e-176	0.399549	0.233	0.269	2.3459e-171	SC
NR2F2	1.3166e-175	0.618238	0.469	0.384	3.5963e-171	SC
ZHX2	1.64336e-175	0.554349	0.412	0.393	4.48885e-171	SC
ACTG1	9.5794e-175	0.451419	0.504	0.573	2.61661e-170	SC
RPS7	1.6764e-174	0.508646	0.44	0.481	4.57909e-170	SC
RPL35A	1.096e-173	0.497372	0.407	0.447	2.99374e-169	SC
SAMHD1	7.42065e-173	0.682391	0.304	0.236	2.02695e-168	SC
SLC38A2	1.40746e-172	0.572228	0.567	0.578	3.84449e-168	SC
RASSF8	1.9593e-172	0.442761	0.285	0.311	5.35181e-168	SC
RPL10A	3.4262e-172	0.501475	0.406	0.434	9.35868e-168	SC
EEF1A1	4.47091e-172	0.55391	0.622	0.654	1.22123e-167	SC
RPS14	5.21475e-172	0.506258	0.432	0.482	1.42441e-167	SC
TIMP1	7.31895e-172	0.693153	0.462	0.467	1.99917e-167	SC
SMARCA1	1.41668e-171	0.548779	0.415	0.434	3.86965e-167	SC
SRP14	1.44377e-171	0.320366	0.262	0.332	3.94366e-167	SC
ARNT	8.09115e-171	0.332102	0.255	0.277	2.2101e-166	SC
NDUFAF2	2.17689e-170	0.535433	0.261	0.245	5.94618e-166	SC
DDX10	4.83474e-170	0.312506	0.27	0.315	1.32061e-165	SC
PFDN5	9.33785e-170	0.271991	0.201	0.266	2.55063e-165	SC
DIP2C	1.01087e-169	0.2876	0.486	0.53	2.76119e-165	SC
GAPDH	5.79513e-169	0.348429	0.328	0.399	1.58294e-164	SC
CD63	8.31805e-169	0.335617	0.26	0.331	2.27207e-164	SC
RPS3A	8.8208e-169	0.335819	0.234	0.296	2.4094e-164	SC
RPL7	1.12876e-168	0.479363	0.371	0.405	3.0832e-164	SC
AP3S1	2.19637e-168	0.299494	0.23	0.27	5.99938e-164	SC
KIZ	5.0048e-168	0.495735	0.292	0.258	1.36706e-163	SC
RNF217	5.39182e-168	0.358019	0.297	0.357	1.47278e-163	SC
RPL30	1.45989e-167	0.534693	0.461	0.501	3.98768e-163	SC
SH3BP5	2.9945e-167	0.626868	0.363	0.366	8.17948e-163	SC
APOO	9.28657e-167	0.582129	0.539	0.561	2.53663e-162	SC
SFT2D2	1.00354e-166	0.447843	0.26	0.247	2.74116e-162	SC
SOD1	1.57038e-166	0.30723	0.216	0.267	4.28949e-162	SC
PPP1CB	4.07237e-166	0.435761	0.38	0.377	1.11237e-161	SC
BSDC1	4.45036e-166	0.272394	0.238	0.271	1.21561e-161	SC
ABCA9	2.423e-165	0.651604	0.313	0.256	6.61843e-161	SC
SEC24D	2.76636e-165	0.362886	0.244	0.266	7.5563e-161	SC
SLC40A1	4.11225e-165	0.495358	0.288	0.296	1.12326e-160	SC
RPL24	1.12488e-164	0.374596	0.272	0.317	3.07261e-160	SC
BMPR1A	2.79458e-164	0.490755	0.456	0.429	7.6334e-160	SC
ENOX1	4.34253e-164	0.855431	0.315	0.237	1.18616e-159	SC
RPL23	4.94578e-164	0.386531	0.31	0.359	1.35094e-159	SC
RPL31	1.00622e-163	0.320537	0.22	0.269	2.74849e-159	SC
AMBRA1	2.80265e-163	0.460142	0.618	0.662	7.65544e-159	SC
RPL27	4.68753e-163	0.424188	0.303	0.346	1.2804e-158	SC
RPL29	1.3184e-162	0.469678	0.514	0.563	3.6012e-158	SC
RACK1	8.84386e-162	0.415625	0.425	0.462	2.4157e-157	SC
C11orf96	1.01834e-161	0.544753	0.406	0.406	2.78161e-157	SC
RPS13	2.72891e-161	0.463549	0.324	0.366	7.45401e-157	SC
TBC1D2B	4.35103e-161	0.41586	0.253	0.25	1.18849e-156	SC
SLC25A3	2.99302e-160	0.279336	0.197	0.255	8.17543e-156	SC
CST3	3.92369e-160	0.388604	0.294	0.336	1.07176e-155	SC
CHRM3	1.80874e-159	0.721959	0.411	0.327	4.94057e-155	SC
RPL21	4.11006e-159	0.373314	0.271	0.319	1.12266e-154	SC
RPL34	4.50462e-159	0.391587	0.325	0.369	1.23044e-154	SC
FBXO21	1.08488e-158	0.417519	0.286	0.277	2.96334e-154	SC
GFPT1	1.24728e-158	0.271508	0.213	0.258	3.40696e-154	SC
CREB3L2	1.56876e-158	0.470827	0.279	0.266	4.28507e-154	SC
STAR	2.80161e-158	0.660927	0.333	0.304	7.65259e-154	SC
PRKN	2.001e-157	0.412739	0.473	0.505	5.46573e-153	SC
FAU	3.16619e-157	0.392069	0.304	0.351	8.64844e-153	SC
CLIP4	6.89929e-157	0.530708	0.272	0.217	1.88454e-152	SC
EEF1B2	2.66597e-156	0.333466	0.225	0.281	7.2821e-152	SC
MEF2C-AS1	1.58369e-155	0.428352	0.37	0.379	4.32585e-151	SC
EIF1AX	2.0729e-155	0.335162	0.245	0.275	5.66213e-151	SC
RPS18	2.35163e-155	0.561935	0.505	0.516	6.42348e-151	SC
RPL19	2.74819e-155	0.502484	0.455	0.479	7.50667e-151	SC
FIGN	9.37019e-155	0.511494	0.274	0.271	2.55947e-150	SC
RPL23A	1.2503e-154	0.49455	0.4	0.436	3.41521e-150	SC
APOE	1.37913e-154	0.628273	0.468	0.494	3.76708e-150	SC
AHI1	1.54772e-154	0.294381	0.423	0.485	4.22761e-150	SC
AMMECR1	2.97353e-154	0.44985	0.237	0.258	8.1222e-150	SC
RNF150	5.55882e-154	0.801478	0.285	0.248	1.51839e-149	SC
RALGPS2	6.49007e-154	0.486765	0.432	0.426	1.77276e-149	SC
SETBP1	6.73587e-154	0.626831	0.491	0.327	1.8399e-149	SC
MAGI2	1.90943e-153	0.5614	0.527	0.527	5.21561e-149	SC
IRS1	2.75018e-153	0.636158	0.455	0.398	7.51211e-149	SC
LINC00894	3.84697e-153	0.403939	0.254	0.26	1.0508e-148	SC
RPL4	5.33645e-153	0.441443	0.315	0.34	1.45765e-148	SC
ADAM12	6.58994e-153	0.832398	0.27	0.201	1.80004e-148	SC
CENPP	1.0594e-152	0.341926	0.238	0.287	2.89374e-148	SC
RPL38	1.77628e-152	0.380336	0.271	0.309	4.85191e-148	SC
SDC2	2.04636e-152	0.663196	0.295	0.24	5.58965e-148	SC
ROBO1	1.36926e-150	0.605866	0.316	0.33	3.74013e-146	SC
RPL10	1.41661e-150	0.598123	0.602	0.604	3.86946e-146	SC
ADCY9	1.74507e-150	0.305941	0.265	0.303	4.76665e-146	SC
RPL14	1.83878e-150	0.414211	0.422	0.469	5.02263e-146	SC
RPL32	2.51416e-150	0.539473	0.522	0.529	6.86743e-146	SC
AC012409.2	5.45746e-150	0.825896	0.274	0.18	1.49071e-145	SC
RBMS3-AS3	2.45989e-149	0.363623	0.273	0.3	6.71918e-145	SC
PTGIS	3.90028e-148	0.726893	0.287	0.167	1.06536e-143	SC
RPL11	5.09964e-148	0.496973	0.548	0.586	1.39297e-143	SC
FAM122C	1.66891e-146	0.335161	0.242	0.258	4.55863e-142	SC
RPLP1	1.70799e-146	0.596421	0.605	0.619	4.66536e-142	SC
FERMT2	1.41446e-145	0.26615	0.31	0.353	3.86359e-141	SC
NCAM1	3.51153e-145	0.812984	0.303	0.204	9.59174e-141	SC
TPT1	5.53664e-145	0.458827	0.628	0.685	1.51233e-140	SC
RBP1	2.92261e-144	0.494146	0.462	0.538	7.98312e-140	SC
FSTL1	7.3381e-144	0.355296	0.292	0.305	2.0044e-139	SC
RPS15A	7.73635e-143	0.326644	0.237	0.282	2.11318e-138	SC
KCNIP4	1.0873e-142	0.927941	0.415	0.406	2.96995e-138	SC
FILIP1L	1.16231e-142	0.357306	0.332	0.37	3.17484e-138	SC
NORAD	3.46628e-142	0.25948	0.215	0.258	9.46815e-138	SC
RBMS3	3.33858e-141	0.437449	0.444	0.434	9.11933e-137	SC
PRICKLE2	7.23376e-141	0.509648	0.337	0.334	1.9759e-136	SC
FKBP5	9.32218e-141	0.36505	0.594	0.605	2.54635e-136	SC
CD81	1.25055e-140	0.375937	0.304	0.319	3.41589e-136	SC
DIAPH2	4.71443e-140	0.277402	0.571	0.617	1.28775e-135	SC
HIVEP1	2.77143e-139	0.263877	0.256	0.299	7.57016e-135	SC
RPS23	3.57905e-139	0.513453	0.496	0.517	9.77617e-135	SC
CEBPB	4.35655e-139	0.511293	0.304	0.287	1.18999e-134	SC
SH3PXD2A	2.18093e-138	0.448673	0.307	0.281	5.95722e-134	SC
TPM1	2.29125e-138	0.437442	0.379	0.356	6.25854e-134	SC
PIK3R1	4.35525e-138	0.366917	0.367	0.403	1.18964e-133	SC
FTL	4.44129e-138	0.479728	0.55	0.578	1.21314e-133	SC
MXI1	4.5095e-138	0.466946	0.291	0.269	1.23177e-133	SC
UNC5C	1.39258e-137	0.644468	0.26	0.272	3.80383e-133	SC
RPS24	1.01314e-136	0.489758	0.52	0.553	2.76738e-132	SC
CACNA2D3	4.16479e-135	0.705363	0.255	0.167	1.13761e-130	SC
QSOX1	5.65807e-134	0.539801	0.259	0.197	1.5455e-129	SC
TMSB10	1.04646e-133	0.448094	0.556	0.658	2.85841e-129	SC
PVT1	1.94441e-133	0.453845	0.613	0.563	5.31115e-129	SC
MAST4	2.02819e-133	0.352333	0.505	0.516	5.53999e-129	SC
FBN1	5.1809e-133	0.445418	0.428	0.375	1.41516e-128	SC
TNRC6C	1.50591e-132	0.293155	0.253	0.271	4.11338e-128	SC
ELL2	1.93594e-132	0.770267	0.327	0.257	5.28802e-128	SC
GATA4	2.3629e-132	0.588009	0.465	0.374	6.45426e-128	SC
FTH1	1.88942e-131	0.3805	0.485	0.546	5.16095e-127	SC
RPS4X	1.38787e-130	0.58547	0.509	0.533	3.79098e-126	SC
BST2	1.27537e-129	0.373157	0.333	0.341	3.48366e-125	SC
VIM	2.65843e-128	0.556638	0.799	0.784	7.2615e-124	SC
KCNQ1OT1	3.91616e-128	0.367229	0.377	0.391	1.0697e-123	SC
JUNB	5.60804e-128	0.391969	0.237	0.262	1.53184e-123	SC
NFIX	8.41613e-128	0.576679	0.29	0.215	2.29887e-123	SC
BCAT1	3.08221e-127	0.281897	0.23	0.272	8.41905e-123	SC
DGKD	8.93161e-127	0.424122	0.278	0.269	2.43967e-122	SC
TAGLN	5.51043e-125	0.402798	0.353	0.371	1.50517e-120	SC
KCND2	2.94524e-124	0.783393	0.407	0.394	8.04491e-120	SC
GALNT10	3.62066e-124	0.271929	0.325	0.371	9.88984e-120	SC
RPL41	4.50057e-124	0.604262	0.573	0.575	1.22933e-119	SC
JAM3	3.38017e-123	0.531685	0.347	0.313	9.23292e-119	SC
SPATS2L	4.76877e-123	0.274684	0.367	0.402	1.30259e-118	SC
WWC3	5.25e-123	0.280004	0.226	0.253	1.43404e-118	SC
ABLIM1	6.52504e-123	0.27026	0.655	0.633	1.78232e-118	SC
FAM19A2	1.53414e-119	0.777574	0.379	0.348	4.1905e-115	SC
DMD	1.31517e-118	0.419018	0.456	0.393	3.5924e-114	SC
ST13	1.01832e-117	0.288027	0.467	0.485	2.78153e-113	SC
RBPMS	1.05048e-114	0.329679	0.663	0.58	2.8694e-110	SC
MATN2	1.30906e-114	0.477841	0.278	0.238	3.5757e-110	SC
LMNA	1.29022e-113	0.280413	0.233	0.25	3.52424e-109	SC
TSPAN5	1.35945e-113	0.384978	0.48	0.491	3.71334e-109	SC
DDIT4	2.88902e-113	0.320214	0.262	0.301	7.89136e-109	SC
SRGAP1	5.18139e-113	0.261961	0.384	0.408	1.4153e-108	SC
AEBP1	5.85123e-112	0.581977	0.266	0.19	1.59826e-107	SC
HS3ST1	8.63481e-111	0.398466	0.264	0.26	2.3586e-106	SC
PTPRD	2.62195e-110	0.546158	0.333	0.301	7.16187e-106	SC
AKAP12	3.17121e-110	0.384155	0.48	0.349	8.66215e-106	SC
PTMS	2.76253e-109	0.307601	0.318	0.337	7.54586e-105	SC
HTRA1	3.74575e-109	0.294307	0.246	0.274	1.02315e-104	SC
ITPR1	4.10314e-109	0.43091	0.602	0.514	1.12077e-104	SC
ESR1	1.57124e-108	0.304455	0.286	0.287	4.29184e-104	SC
PLCL2	1.43832e-107	0.371118	0.255	0.248	3.92877e-103	SC
NECTIN3	1.83396e-106	0.441074	0.294	0.26	5.00947e-102	SC
PALLD	3.88949e-106	0.373729	0.467	0.419	1.06241e-101	SC
PKNOX2	1.82239e-103	0.546734	0.266	0.21	4.97786e-99	SC
FOXO1	4.82438e-100	0.46612	0.728	0.74	1.31778e-95	SC
WISP2	1.80628e-99	0.259456	0.219	0.27	4.93385e-95	SC
BCL2	1.42499e-98	0.350524	0.394	0.392	3.89235e-94	SC
SEMA6A	2.21177e-98	0.560902	0.278	0.303	6.04146e-94	SC
SLIT3	2.82158e-95	0.611698	0.288	0.17	7.70715e-91	SC
ANK2	5.32774e-94	0.430354	0.401	0.373	1.45527e-89	SC
SULF2	7.97518e-94	0.294075	0.297	0.318	2.17842e-89	SC
PARD3B	1.22609e-89	0.394882	0.696	0.654	3.34907e-85	SC
HBB	3.68737e-89	0.546245	0.254	0.258	1.0072e-84	SC
GULP1	3.87724e-89	0.400692	0.332	0.309	1.05907e-84	SC
ROBO2	1.14822e-88	0.594328	0.29	0.257	3.13635e-84	SC
DPYSL3	4.48004e-88	0.254811	0.373	0.459	1.22372e-83	SC
ABI3BP	1.8425e-84	0.4667	0.275	0.205	5.0328e-80	SC
NR2F1-AS1	4.08716e-83	0.368188	0.315	0.297	1.11641e-78	SC
ZEB2	3.3129e-82	0.292148	0.522	0.499	9.04918e-78	SC
SYNE1	6.59887e-80	0.271101	0.48	0.471	1.80248e-75	SC
INSR	4.06139e-79	0.311696	0.745	0.719	1.10937e-74	SC
EBF1	2.71999e-78	0.419245	0.529	0.43	7.42964e-74	SC
WIPF3	3.25957e-78	0.359269	0.402	0.384	8.90351e-74	SC
MT-CO3	5.04955e-78	0.25794	0.883	0.907	1.37928e-73	SC
SCD5	7.07521e-78	0.313628	0.323	0.326	1.93259e-73	SC
SNED1	7.03236e-77	0.293693	0.34	0.334	1.92089e-72	SC
GPC6	3.25713e-76	0.530713	0.542	0.489	8.89686e-72	SC
PLCL1	2.82071e-74	0.396723	0.421	0.417	7.70477e-70	SC
DLC1	2.81518e-73	0.284923	0.43	0.326	7.68965e-69	SC
SYT1	7.43936e-70	0.538341	0.257	0.208	2.03206e-65	SC
PDZRN4	2.45112e-69	0.562273	0.377	0.334	6.69524e-65	SC
TRPS1	6.27827e-69	0.368228	0.353	0.284	1.71491e-64	SC
DENND2A	1.36039e-68	0.382786	0.269	0.224	3.7159e-64	SC
EVA1C	4.71676e-65	0.274575	0.293	0.3	1.28838e-60	SC
ENG	7.12844e-58	0.254038	0.28	0.269	1.94713e-53	SC
FGFR1	2.80972e-56	0.277191	0.394	0.364	7.67474e-52	SC
AUTS2	3.59663e-53	0.292169	0.789	0.765	9.82418e-49	SC
MSI2	1.41852e-51	0.313494	0.687	0.66	3.87468e-47	SC
ANO2	0	4.32164	0.793	0.029	0	BEC
ARL15	0	3.83069	0.858	0.385	0	BEC
VWF	0	3.64447	0.781	0.066	0	BEC
LDB2	0	3.6292	0.941	0.238	0	BEC
MECOM	0	3.53786	0.863	0.228	0	BEC
FLT1	0	3.43755	0.709	0.024	0	BEC
ST6GAL1	0	3.35138	0.762	0.093	0	BEC
PLCB4	0	3.3239	0.786	0.1	0	BEC
DOCK9	0	3.24724	0.891	0.198	0	BEC
EPB41L4A	0	3.09526	0.724	0.095	0	BEC
ENPP2	0	3.0818	0.41	0.037	0	BEC
EXOC6	0	3.07188	0.807	0.201	0	BEC
RP1	0	2.87664	0.508	0.015	0	BEC
PTPRB	0	2.8402	0.687	0.028	0	BEC
ABCB1	0	2.82283	0.567	0.018	0	BEC
DACH1	0	2.82194	0.579	0.028	0	BEC
PREX2	0	2.80283	0.705	0.065	0	BEC
ADGRL4	0	2.76623	0.666	0.022	0	BEC
PDE4D	0	2.69612	0.718	0.111	0	BEC
MYRIP	0	2.6895	0.604	0.104	0	BEC
FLI1	0	2.65558	0.671	0.046	0	BEC
LIMCH1	0	2.65039	0.734	0.138	0	BEC
SASH1	0	2.49562	0.835	0.199	0	BEC
SPARCL1	0	2.48326	0.788	0.311	0	BEC
PLEKHG1	0	2.45943	0.708	0.161	0	BEC
BACE2	0	2.42193	0.669	0.203	0	BEC
EPAS1	0	2.40379	0.733	0.142	0	BEC
PCAT1	0	2.40059	0.487	0.054	0	BEC
TIMP3	0	2.39017	0.614	0.125	0	BEC
MCTP1	0	2.36714	0.394	0.049	0	BEC
GALNT18	0	2.36644	0.589	0.077	0	BEC
TCF4	0	2.34213	0.922	0.596	0	BEC
EFNB2	0	2.34029	0.449	0.035	0	BEC
PTPRM	0	2.32955	0.919	0.522	0	BEC
PRKCH	0	2.29312	0.699	0.129	0	BEC
ABCC4	0	2.29064	0.626	0.121	0	BEC
MAGI1	0	2.28158	0.899	0.452	0	BEC
CTGF	0	2.26717	0.494	0.122	0	BEC
ARHGAP26	0	2.25857	0.716	0.187	0	BEC
RALGAPA2	0	2.24854	0.777	0.341	0	BEC
GRB10	0	2.19294	0.664	0.175	0	BEC
PALMD	0	2.13511	0.491	0.042	0	BEC
TGFBR2	0	2.13485	0.652	0.193	0	BEC
ERG	0	2.13369	0.647	0.073	0	BEC
CALCRL	0	2.12597	0.64	0.185	0	BEC
DNM3	0	2.11757	0.612	0.172	0	BEC
NUAK1	0	2.11536	0.568	0.095	0	BEC
SAMD12	0	2.0812	0.511	0.076	0	BEC
AC073050.1	0	2.07413	0.253	0.012	0	BEC
CYYR1	0	2.04955	0.432	0.02	0	BEC
ZNF385D	0	2.04579	0.337	0.049	0	BEC
A2M	0	2.03123	0.572	0.084	0	BEC
CLDN5	0	2.0228	0.503	0.068	0	BEC
PECAM1	0	2.02256	0.477	0.055	0	BEC
EMCN	0	1.99126	0.461	0.03	0	BEC
LDLRAD4	0	1.98202	0.594	0.085	0	BEC
DCC	0	1.97357	0.268	0.024	0	BEC
ELMO1	0	1.96956	0.753	0.25	0	BEC
ST6GALNAC3	0	1.96131	0.496	0.131	0	BEC
NOSTRIN	0	1.95484	0.442	0.037	0	BEC
CXorf36	0	1.95369	0.505	0.023	0	BEC
EGFL7	0	1.92277	0.54	0.038	0	BEC
DYSF	0	1.91909	0.443	0.026	0	BEC
NFIB	0	1.91705	0.852	0.411	0	BEC
MKL2	0	1.90598	0.611	0.252	0	BEC
RAPGEF5	0	1.89242	0.515	0.074	0	BEC
ARHGAP29	0	1.8787	0.517	0.069	0	BEC
NEDD9	0	1.85597	0.414	0.073	0	BEC
PCDH17	0	1.8362	0.298	0.012	0	BEC
PKP4	0	1.82918	0.754	0.33	0	BEC
LIFR	0	1.78381	0.744	0.383	0	BEC
CRIM1	0	1.76756	0.784	0.341	0	BEC
PPP1R16B	0	1.76188	0.471	0.023	0	BEC
TEK	0	1.74979	0.466	0.024	0	BEC
SEC14L1	0	1.74942	0.578	0.188	0	BEC
LRCH1	0	1.73268	0.672	0.238	0	BEC
CADPS2	0	1.72433	0.758	0.331	0	BEC
TMCC3	0	1.71949	0.412	0.066	0	BEC
ADGRF5	0	1.7123	0.411	0.021	0	BEC
MYO5C	0	1.71143	0.422	0.023	0	BEC
MGAT4A	0	1.69408	0.479	0.062	0	BEC
AC010737.1	0	1.67916	0.344	0.031	0	BEC
ENTPD1	0	1.67842	0.357	0.017	0	BEC
GFOD1	0	1.64509	0.396	0.038	0	BEC
PARVB	0	1.64374	0.423	0.063	0	BEC
DOCK4	0	1.64057	0.838	0.487	0	BEC
PLCB1	0	1.62522	0.734	0.216	0	BEC
NOTCH4	0	1.62476	0.406	0.003	0	BEC
ARHGAP31	0	1.60317	0.601	0.165	0	BEC
KALRN	0	1.5989	0.627	0.18	0	BEC
CNTNAP3B	0	1.58333	0.422	0.034	0	BEC
MEF2C	0	1.56348	0.768	0.369	0	BEC
UTRN	0	1.55569	0.881	0.563	0	BEC
FAM241A	0	1.55273	0.424	0.054	0	BEC
AFAP1L1	0	1.54024	0.418	0.025	0	BEC
TANC1	0	1.5145	0.748	0.339	0	BEC
FAM171A1	0	1.5114	0.493	0.108	0	BEC
EPHA4	0	1.50923	0.496	0.108	0	BEC
SHANK3	0	1.50879	0.435	0.019	0	BEC
ADGRG6	0	1.5081	0.284	0.01	0	BEC
CD34	0	1.505	0.422	0.046	0	BEC
PCAT19	0	1.49393	0.425	0.027	0	BEC
MCF2L	0	1.47704	0.369	0.02	0	BEC
IRAK3	0	1.44514	0.472	0.092	0	BEC
MLKL	0	1.4336	0.282	0.018	0	BEC
INPP5D	0	1.41333	0.407	0.025	0	BEC
SWAP70	0	1.39985	0.472	0.104	0	BEC
RUNDC3B	0	1.34081	0.292	0.02	0	BEC
ABCG1	0	1.2884	0.338	0.035	0	BEC
AQP1	0	1.28136	0.268	0.014	0	BEC
CD93	0	1.25173	0.309	0.016	0	BEC
FGD5	0	1.2371	0.435	0.063	0	BEC
CLEC1A	0	1.23405	0.268	0.006	0	BEC
GCNT2	0	1.20448	0.301	0.02	0	BEC
TIE1	0	1.1687	0.314	0.023	0	BEC
TMEM255B	0	1.13406	0.307	0.023	0	BEC
PODXL	0	1.13397	0.29	0.019	0	BEC
GIMAP8	1.97626258336499e-323	1.0949	0.264	0.016	5.39816124646146e-319	BEC
MSN	5.14554548174283e-319	1.45109	0.596	0.186	1.40550574833805e-314	BEC
ITGA6	5.36959e-307	1.48325	0.468	0.107	1.4667e-302	BEC
RPGR	4.03815e-302	1.46536	0.424	0.088	1.10302e-297	BEC
ACER2	8.27283e-301	1.29375	0.307	0.034	2.25972e-296	BEC
LEPR	2.32365e-297	1.35765	0.597	0.197	6.34705e-293	BEC
RIPOR2	1.11381e-294	1.71144	0.287	0.033	3.04236e-290	BEC
PXN	3.04847e-293	1.15948	0.402	0.075	8.32689e-289	BEC
RFX3	1.15287e-292	1.44904	0.751	0.39	3.14906e-288	BEC
SHE	1.11846e-291	0.971449	0.266	0.021	3.05507e-287	BEC
CDH5	2.76064e-291	0.908345	0.269	0.022	7.54069e-287	BEC
WWTR1	5.87142e-291	1.56433	0.796	0.493	1.60378e-286	BEC
HSPA1A	2.49762e-290	1.6605	0.634	0.28	6.82225e-286	BEC
STOM	1.176e-286	1.51444	0.501	0.146	3.21224e-282	BEC
RGS3	2.01348e-285	1.02594	0.28	0.027	5.49982e-281	BEC
PIK3C2B	1.24331e-284	1.17904	0.284	0.032	3.3961e-280	BEC
THSD7A	6.77032e-282	2.01915	0.472	0.14	1.84931e-277	BEC
LPCAT2	1.34652e-278	1.20703	0.381	0.067	3.67801e-274	BEC
MBNL1	3.34975e-278	1.42937	0.835	0.621	9.14985e-274	BEC
TACC1	7.88789e-275	1.38702	0.794	0.515	2.15458e-270	BEC
KIAA0355	1.43525e-274	1.3202	0.558	0.198	3.92039e-270	BEC
VEGFC	7.71765e-274	2.02909	0.316	0.065	2.10808e-269	BEC
STOX2	1.73308e-272	1.36031	0.442	0.099	4.7339e-268	BEC
ZEB1	1.93135e-269	1.35698	0.727	0.352	5.27549e-265	BEC
RASIP1	6.47578e-269	0.885044	0.281	0.03	1.76886e-264	BEC
TMTC2	3.55453e-266	1.66775	0.528	0.183	9.70921e-262	BEC
APP	3.72433e-264	1.05398	0.87	0.604	1.0173e-259	BEC
TPD52L1	6.81822e-264	1.2305	0.284	0.034	1.8624e-259	BEC
SMAD1	1.43715e-262	1.28153	0.456	0.112	3.92557e-258	BEC
PLPP1	3.3445e-260	2.39659	0.432	0.155	9.13551e-256	BEC
NR5A2	3.03107e-257	0.87078	0.433	0.108	8.27937e-253	BEC
NXN	1.61678e-250	1.22464	0.671	0.293	4.41624e-246	BEC
NCOA7	3.88012e-249	1.43854	0.556	0.231	1.05985e-244	BEC
CMIP	1.04677e-248	1.23233	0.714	0.383	2.85926e-244	BEC
SHROOM4	9.4079e-248	1.02828	0.314	0.048	2.56977e-243	BEC
IL3RA	1.62305e-246	1.23716	0.317	0.055	4.43336e-242	BEC
EMP1	5.46217e-246	1.25323	0.336	0.058	1.49199e-241	BEC
DGKE	1.05726e-243	1.23062	0.389	0.089	2.8879e-239	BEC
ITGA1	1.14354e-240	1.3105	0.419	0.101	3.12358e-236	BEC
SRGN	1.34822e-240	1.13124	0.334	0.059	3.68267e-236	BEC
ETS1	2.60229e-239	1.36168	0.462	0.131	7.10816e-235	BEC
ELK3	2.74812e-236	1.00209	0.314	0.051	7.50649e-232	BEC
CCDC178	1.36434e-234	1.12798	0.426	0.106	3.72669e-230	BEC
DENND3	2.5158e-232	0.850845	0.271	0.035	6.8719e-228	BEC
GIPC2	7.09421e-231	1.13272	0.381	0.088	1.93778e-226	BEC
PDLIM1	7.5431e-231	1.23474	0.314	0.055	2.0604e-226	BEC
FAT4	2.5243e-229	1.5717	0.441	0.136	6.89513e-225	BEC
GMDS	1.69368e-225	1.40546	0.539	0.202	4.62628e-221	BEC
ANGPT2	5.87545e-225	1.21361	0.447	0.125	1.60488e-220	BEC
ITGA9	1.77056e-224	1.26985	0.573	0.229	4.83627e-220	BEC
RIN2	6.13939e-223	1.25364	0.621	0.279	1.67697e-218	BEC
MRC1	5.46271e-220	1.05799	0.289	0.046	1.49214e-215	BEC
CPNE8	9.58376e-219	1.2599	0.517	0.191	2.6178e-214	BEC
FYN	5.75001e-218	1.08889	0.677	0.337	1.57061e-213	BEC
F8	2.84476e-217	1.29624	0.256	0.041	7.77048e-213	BEC
CDK17	1.01339e-215	1.14026	0.599	0.262	2.76809e-211	BEC
FNBP1L	7.07975e-215	1.22828	0.518	0.191	1.93383e-210	BEC
AL365273.2	7.08431e-215	1.00771	0.27	0.045	1.93508e-210	BEC
RBMS2	1.12052e-214	1.12231	0.466	0.151	3.06071e-210	BEC
RAPGEF1	1.38179e-213	1.17472	0.532	0.201	3.77435e-209	BEC
PELI1	1.40156e-213	1.39405	0.362	0.092	3.82837e-209	BEC
NEDD4	1.54535e-213	1.09178	0.494	0.163	4.22111e-209	BEC
CFLAR	3.4305e-211	1.14737	0.584	0.257	9.37041e-207	BEC
FRYL	7.08042e-210	1.07047	0.726	0.402	1.93402e-205	BEC
AFF1	5.27027e-209	0.993048	0.818	0.573	1.43958e-204	BEC
ADAMTS9	2.10835e-208	1.73375	0.479	0.178	5.75895e-204	BEC
TJP1	2.61379e-207	1.13221	0.703	0.357	7.13956e-203	BEC
IQCJ-SCHIP1	1.22551e-206	1.36877	0.277	0.048	3.34747e-202	BEC
SPRY1	3.05085e-206	1.44942	0.277	0.05	8.3334e-202	BEC
PHACTR1	1.4117e-205	1.09065	0.321	0.066	3.85606e-201	BEC
CAVIN2	4.0616e-203	1.06053	0.299	0.055	1.10943e-198	BEC
HLA-E	1.17907e-202	1.24813	0.502	0.189	3.22063e-198	BEC
EHD4	2.05588e-201	0.963791	0.269	0.044	5.61563e-197	BEC
CLIC2	2.12783e-201	1.18226	0.318	0.066	5.81216e-197	BEC
SSFA2	5.86528e-201	1.0834	0.385	0.107	1.6021e-196	BEC
LIMS2	8.02254e-201	0.78249	0.258	0.038	2.19136e-196	BEC
WT1	5.3264e-198	1.13674	0.498	0.173	1.45491e-193	BEC
IVNS1ABP	6.00691e-196	1.45879	0.417	0.165	1.64079e-191	BEC
CTTNBP2NL	3.0436e-195	1.16783	0.399	0.121	8.31359e-191	BEC
ATP8B1	4.91437e-195	1.32867	0.411	0.133	1.34236e-190	BEC
NLRP1	3.00207e-194	0.844209	0.301	0.058	8.20015e-190	BEC
CCND3	4.78971e-194	1.02521	0.562	0.224	1.30831e-189	BEC
VAV3	3.16806e-192	0.771604	0.264	0.049	8.65354e-188	BEC
PTPRE	1.7814e-190	0.883169	0.321	0.071	4.8659e-186	BEC
TM4SF1	1.59323e-187	1.09342	0.271	0.048	4.35192e-183	BEC
PITPNC1	2.95631e-187	1.15179	0.692	0.37	8.07517e-183	BEC
ADIPOR2	6.28758e-186	1.25943	0.514	0.231	1.71745e-181	BEC
HPCAL1	6.19403e-184	0.95101	0.316	0.071	1.6919e-179	BEC
ASAP1	3.28561e-182	0.90405	0.831	0.611	8.97464e-178	BEC
CAPZA2	4.25598e-178	0.99862	0.481	0.181	1.16252e-173	BEC
RASAL2	5.35328e-178	1.18481	0.654	0.371	1.46225e-173	BEC
SLC35G2	3.90859e-174	0.827797	0.269	0.053	1.06763e-169	BEC
HSD17B12	1.30283e-173	1.05433	0.582	0.274	3.55868e-169	BEC
NAV1	5.86396e-173	0.963198	0.353	0.097	1.60174e-168	BEC
DGKH	6.77566e-173	0.968297	0.562	0.24	1.85077e-168	BEC
NEURL1B	1.43721e-172	1.07634	0.351	0.094	3.92573e-168	BEC
EGLN1	6.34968e-171	1.62171	0.454	0.206	1.73442e-166	BEC
MYH9	2.14311e-170	1.03615	0.594	0.291	5.85391e-166	BEC
ARGLU1	2.94375e-170	0.982862	0.686	0.428	8.04085e-166	BEC
ARHGEF3	3.9198e-169	1.41808	0.56	0.292	1.07069e-164	BEC
HMCN1	1.3431e-167	1.08283	0.319	0.079	3.66867e-163	BEC
HSPG2	2.23163e-167	1.02109	0.472	0.18	6.09569e-163	BEC
PLCG2	1.4511e-166	0.945932	0.701	0.397	3.96369e-162	BEC
MAP2	2.3899e-165	0.962456	0.412	0.134	6.52801e-161	BEC
RAPGEF4	5.63955e-164	1.16583	0.417	0.146	1.54044e-159	BEC
CNOT6L	2.98678e-163	1.07715	0.547	0.26	8.1584e-159	BEC
ATP11A	3.49801e-163	1.00273	0.553	0.251	9.5548e-159	BEC
LMBR1	8.81272e-161	1.0195	0.627	0.338	2.40719e-156	BEC
DLEU2	1.23478e-160	0.940056	0.554	0.247	3.37281e-156	BEC
OSBPL10	1.39534e-160	1.03896	0.337	0.093	3.81137e-156	BEC
RPS6KA3	2.26376e-159	0.996711	0.617	0.321	6.18346e-155	BEC
CARD8	7.72996e-159	0.852796	0.341	0.097	2.11144e-154	BEC
CHD7	7.37696e-156	0.936104	0.337	0.095	2.01502e-151	BEC
CCNY	2.24798e-155	0.994982	0.729	0.469	6.14037e-151	BEC
NPAS2	9.54949e-151	1.0743	0.357	0.118	2.60844e-146	BEC
HOXD3	4.06505e-150	0.88552	0.335	0.098	1.11037e-145	BEC
DOCK6	4.78169e-150	0.832051	0.303	0.079	1.30612e-145	BEC
ACACB	8.39963e-148	0.985426	0.428	0.164	2.29436e-143	BEC
EEPD1	1.52869e-147	0.992423	0.424	0.157	4.17562e-143	BEC
MYO1E	1.13439e-146	1.102	0.534	0.249	3.09857e-142	BEC
CACHD1	1.8119e-145	1.20089	0.588	0.329	4.94919e-141	BEC
PPP1R13B	1.33202e-144	0.926784	0.482	0.203	3.63842e-140	BEC
ITPKB	3.55073e-143	0.951554	0.291	0.077	9.69881e-139	BEC
NEAT1	1.41131e-142	0.740154	0.946	0.873	3.85501e-138	BEC
DOCK1	1.90993e-142	0.873301	0.731	0.491	5.21697e-138	BEC
PPP2R5A	2.09482e-142	0.885261	0.354	0.113	5.722e-138	BEC
STK10	1.52825e-141	0.680045	0.252	0.056	4.17442e-137	BEC
C17orf67	2.29386e-141	0.762007	0.312	0.088	6.26567e-137	BEC
SNAP23	2.44768e-141	1.1787	0.51	0.28	6.68583e-137	BEC
KCTD12	4.4521e-141	0.97148	0.306	0.085	1.21609e-136	BEC
MGST2	8.09251e-141	0.838933	0.332	0.101	2.21047e-136	BEC
GNAQ	9.24476e-141	0.812727	0.802	0.599	2.52521e-136	BEC
PLSCR4	3.16549e-140	0.960288	0.607	0.322	8.64655e-136	BEC
RAPGEF2	6.36209e-140	0.918876	0.652	0.369	1.73781e-135	BEC
RHOJ	7.75975e-139	0.845456	0.333	0.101	2.11958e-134	BEC
TPST2	1.3187e-138	0.748458	0.254	0.058	3.60202e-134	BEC
AKT3	8.89784e-138	0.763625	0.89	0.767	2.43044e-133	BEC
ASAP2	3.42164e-137	0.790053	0.526	0.238	9.34622e-133	BEC
KIAA1217	5.36681e-136	1.08107	0.481	0.209	1.46594e-131	BEC
TSPAN14	1.38949e-134	0.694011	0.381	0.134	3.79538e-130	BEC
HEG1	1.43504e-133	0.833542	0.337	0.107	3.91982e-129	BEC
GSN	1.72491e-131	0.910354	0.528	0.252	4.71159e-127	BEC
TNFRSF10B	3.14607e-130	0.860346	0.293	0.085	8.5935e-126	BEC
SORBS1	3.2726e-129	1.13431	0.502	0.252	8.93912e-125	BEC
ARHGEF7	4.05223e-129	1.08484	0.599	0.351	1.10687e-124	BEC
CCDC50	4.26538e-129	0.865164	0.533	0.265	1.16509e-124	BEC
HSPB1	1.56002e-128	1.20298	0.63	0.396	4.26121e-124	BEC
ACTN4	5.62199e-128	0.831565	0.551	0.275	1.53565e-123	BEC
FZD4	1.77604e-127	0.660104	0.287	0.081	4.85126e-123	BEC
SESN3	4.45863e-127	1.19794	0.556	0.325	1.21788e-122	BEC
OSMR	2.13163e-126	0.890094	0.497	0.229	5.82255e-122	BEC
SMARCA2	3.84553e-126	0.918195	0.662	0.401	1.05041e-121	BEC
RPS6KA2	4.93349e-126	0.917805	0.503	0.234	1.34758e-121	BEC
ITGA5	1.88983e-124	0.843091	0.35	0.121	5.16208e-120	BEC
MEIS2	7.13656e-123	1.16614	0.683	0.465	1.94935e-118	BEC
IFI16	1.26034e-122	0.889383	0.507	0.247	3.44263e-118	BEC
TXNIP	1.26647e-122	1.02183	0.624	0.374	3.45935e-118	BEC
PIK3C2A	2.08246e-122	0.872979	0.538	0.288	5.68825e-118	BEC
TFPI	4.76718e-121	0.468149	0.455	0.197	1.30216e-116	BEC
KLF7	5.7538e-121	0.717543	0.489	0.223	1.57165e-116	BEC
SLC39A14	3.33363e-120	0.84068	0.355	0.13	9.10582e-116	BEC
OSBPL1A	6.23467e-120	1.14264	0.596	0.391	1.703e-115	BEC
ITPRIP	9.95563e-120	0.977307	0.296	0.096	2.71938e-115	BEC
CWF19L2	3.3192e-118	1.08199	0.493	0.292	9.06641e-114	BEC
SNRK	5.93601e-118	0.964548	0.411	0.179	1.62142e-113	BEC
ABHD3	1.10706e-117	1.12111	0.434	0.22	3.02395e-113	BEC
BAG3	2.07246e-117	1.1474	0.422	0.188	5.66092e-113	BEC
ST3GAL1	9.15553e-116	0.745913	0.378	0.146	2.50083e-111	BEC
TSPAN9	4.78352e-115	0.733389	0.505	0.243	1.30662e-110	BEC
VOPP1	9.61544e-115	0.72999	0.38	0.148	2.62646e-110	BEC
LRRFIP1	9.02906e-114	0.780184	0.528	0.266	2.46629e-109	BEC
MYOF	2.2138e-113	0.769506	0.442	0.194	6.04699e-109	BEC
HSPA1B	6.78286e-112	1.06815	0.607	0.395	1.85274e-107	BEC
BMPR2	7.51814e-112	0.767206	0.667	0.406	2.05358e-107	BEC
RAI14	7.576e-112	0.82399	0.426	0.186	2.06938e-107	BEC
RIMKLB	1.18543e-110	1.49982	0.39	0.182	3.23801e-106	BEC
SAT1	1.10642e-109	0.954273	0.519	0.26	3.0222e-105	BEC
STK38L	5.04371e-109	0.91056	0.314	0.116	1.37769e-104	BEC
CEP112	2.43957e-108	0.811435	0.593	0.342	6.6637e-104	BEC
TOX	6.46071e-108	0.800222	0.257	0.076	1.76474e-103	BEC
CLEC2B	5.45927e-107	0.993255	0.271	0.087	1.4912e-102	BEC
ZBTB46	5.54214e-107	0.713745	0.419	0.183	1.51384e-102	BEC
ARHGAP17	6.80868e-107	0.757407	0.488	0.242	1.85979e-102	BEC
IL4R	3.26047e-105	0.693987	0.26	0.078	8.90598e-101	BEC
PRKD2	5.58098e-105	0.695548	0.369	0.148	1.52444e-100	BEC
MTRNR2L12	1.30402e-104	0.685634	0.702	0.443	3.56193e-100	BEC
RIN3	7.63052e-104	0.686411	0.268	0.084	2.08428e-99	BEC
MTMR10	1.02087e-103	0.895538	0.306	0.114	2.7885e-99	BEC
ADARB1	2.52236e-103	0.632342	0.286	0.095	6.88982e-99	BEC
AFAP1L2	1.07286e-102	0.615903	0.292	0.1	2.93052e-98	BEC
HSPH1	1.64891e-102	1.23572	0.562	0.392	4.50399e-98	BEC
CSGALNACT1	1.68589e-102	0.90007	0.451	0.212	4.60502e-98	BEC
HERC2	2.15555e-102	0.784155	0.67	0.441	5.88788e-98	BEC
MPDZ	2.739e-102	0.734778	0.676	0.436	7.48157e-98	BEC
TCF7L1	7.37897e-102	0.753834	0.593	0.341	2.01556e-97	BEC
TBC1D15	8.7602e-102	0.732105	0.533	0.285	2.39285e-97	BEC
CDC14A	2.27654e-101	0.879439	0.343	0.135	6.21836e-97	BEC
KMT2E	6.61388e-101	0.676713	0.767	0.571	1.80658e-96	BEC
MMP16	2.61548e-100	0.936386	0.393	0.173	7.1442e-96	BEC
MCU	6.56977e-100	0.895033	0.497	0.268	1.79453e-95	BEC
QKI	9.86979e-100	0.774057	0.773	0.589	2.69593e-95	BEC
PGS1	1.00855e-99	0.626535	0.252	0.077	2.75486e-95	BEC
HIP1	2.95651e-99	0.606823	0.553	0.301	8.07571e-95	BEC
PTK2	2.58228e-98	0.597258	0.831	0.669	7.05349e-94	BEC
SUSD6	3.00058e-98	0.735824	0.378	0.161	8.1961e-94	BEC
PDZD2	4.06126e-98	0.907183	0.592	0.36	1.10933e-93	BEC
LYST	4.95015e-98	0.884268	0.482	0.254	1.35213e-93	BEC
YES1	2.44028e-97	0.73601	0.373	0.16	6.66562e-93	BEC
FMNL2	1.34405e-96	0.80067	0.749	0.59	3.67128e-92	BEC
LRMDA	2.57486e-96	0.724514	0.714	0.471	7.03324e-92	BEC
HIBCH	2.90258e-96	1.00662	0.573	0.395	7.9284e-92	BEC
FRMD4A	3.46697e-96	0.590693	0.327	0.127	9.47002e-92	BEC
NLK	1.6034e-95	0.768094	0.496	0.259	4.3797e-91	BEC
TPTEP2-CSNK1E	4.62122e-95	0.615524	0.295	0.106	1.26229e-90	BEC
UGCG	8.40667e-95	0.880227	0.393	0.188	2.29628e-90	BEC
PHACTR2	9.95152e-95	0.779845	0.479	0.249	2.71826e-90	BEC
NFAT5	2.74111e-94	0.708929	0.742	0.549	7.48735e-90	BEC
FUT8	4.99896e-94	0.833333	0.475	0.247	1.36547e-89	BEC
FRMD3	6.93922e-94	0.819449	0.301	0.111	1.89545e-89	BEC
FLNB	1.51099e-92	0.733714	0.484	0.253	4.12727e-88	BEC
RASGRF2	1.11009e-91	0.817437	0.425	0.205	3.03222e-87	BEC
ARHGAP18	3.97721e-91	0.827308	0.309	0.121	1.08638e-86	BEC
PIP5K1C	9.09641e-91	0.529528	0.269	0.094	2.48468e-86	BEC
AL136531.2	4.02065e-90	0.814762	0.325	0.135	1.09824e-85	BEC
AAK1	1.66414e-89	0.741403	0.532	0.3	4.54559e-85	BEC
HSPE1-MOB4	2.57559e-87	0.820187	0.311	0.123	7.03523e-83	BEC
TIAM1	3.41885e-87	0.727207	0.332	0.137	9.33858e-83	BEC
MSRA	2.42843e-86	0.679044	0.314	0.126	6.63327e-82	BEC
SLC22A23	3.25642e-86	0.87141	0.28	0.104	8.89491e-82	BEC
PICALM	3.74042e-86	0.632436	0.771	0.592	1.0217e-81	BEC
FAM219A	5.44796e-86	0.503454	0.257	0.089	1.48811e-81	BEC
JAG1	6.84809e-86	0.743033	0.282	0.105	1.87056e-81	BEC
DAB2IP	9.35106e-86	0.628075	0.322	0.131	2.55424e-81	BEC
CAV1	2.99693e-85	0.650569	0.326	0.134	8.18613e-81	BEC
XAF1	6.18282e-85	0.629257	0.464	0.241	1.68884e-80	BEC
CYTH1	1.40148e-83	0.743912	0.376	0.175	3.82814e-79	BEC
FRMD4B	3.38903e-83	0.455456	0.334	0.154	9.25713e-79	BEC
UBC	3.58903e-83	0.754723	0.571	0.35	9.80343e-79	BEC
SP100	4.38532e-83	0.620312	0.461	0.241	1.19785e-78	BEC
FRY	6.32962e-83	0.627708	0.342	0.148	1.72894e-78	BEC
VPS13A	1.57674e-82	0.682684	0.406	0.198	4.30687e-78	BEC
SDCBP	2.41958e-82	0.607528	0.461	0.241	6.60908e-78	BEC
LHFPL6	2.92488e-82	0.650803	0.709	0.485	7.98932e-78	BEC
SPTLC2	6.95247e-82	0.631919	0.321	0.134	1.89907e-77	BEC
BTG1	8.12732e-82	0.560746	0.441	0.225	2.21998e-77	BEC
PTPN14	8.53413e-82	0.623488	0.529	0.302	2.3311e-77	BEC
SH3RF3	1.40499e-81	0.772111	0.33	0.143	3.83773e-77	BEC
PRSS23	1.43967e-80	0.907063	0.449	0.253	3.93246e-76	BEC
NRP1	2.99524e-79	0.703073	0.556	0.336	8.18149e-75	BEC
NR3C2	7.24874e-79	0.454695	0.491	0.273	1.97999e-74	BEC
RUNX1T1	3.671e-77	0.831533	0.364	0.171	1.00273e-72	BEC
TBC1D22A	3.89686e-77	0.590813	0.522	0.303	1.06443e-72	BEC
FNIP2	5.04859e-77	0.660778	0.301	0.125	1.37902e-72	BEC
GNA14	1.04428e-76	0.847791	0.372	0.177	2.85245e-72	BEC
USP6NL	1.16891e-76	0.701691	0.377	0.182	3.19288e-72	BEC
KIF13B	2.64306e-76	0.72888	0.363	0.174	7.21952e-72	BEC
CDC42BPA	1.16413e-75	0.668262	0.664	0.465	3.17983e-71	BEC
HSPD1	2.16746e-75	1.04836	0.545	0.412	5.92042e-71	BEC
CNST	2.58363e-75	0.600441	0.372	0.179	7.05718e-71	BEC
FEZ2	1.45206e-74	0.671764	0.379	0.187	3.96631e-70	BEC
TBCD	1.8927e-74	0.581726	0.412	0.211	5.16991e-70	BEC
SFMBT2	2.21505e-74	0.720674	0.561	0.363	6.05041e-70	BEC
CD2AP	6.62031e-74	0.678579	0.39	0.196	1.80834e-69	BEC
DNAJB6	8.55188e-74	0.743315	0.581	0.409	2.33595e-69	BEC
STARD13	3.38512e-73	0.581759	0.568	0.351	9.24647e-69	BEC
ZNF521	2.91227e-72	0.671484	0.557	0.344	7.95488e-68	BEC
SSH1	2.79292e-71	0.623661	0.333	0.154	7.62886e-67	BEC
GNG11	4.17267e-71	0.364511	0.286	0.126	1.13976e-66	BEC
TMTC1	5.9689e-71	0.926915	0.567	0.369	1.63041e-66	BEC
CLIC4	1.09342e-70	0.594384	0.435	0.234	2.98668e-66	BEC
DHFR	2.18377e-70	0.585383	0.607	0.391	5.96496e-66	BEC
HIPK3	4.7923e-70	0.808855	0.593	0.422	1.30902e-65	BEC
CHIC2	6.62304e-70	0.64172	0.418	0.227	1.80908e-65	BEC
TTLL5	7.36495e-70	0.632217	0.402	0.209	2.01174e-65	BEC
ABLIM1	1.31183e-69	0.719355	0.786	0.638	3.58327e-65	BEC
BEND7	2.31127e-69	0.525909	0.263	0.106	6.31323e-65	BEC
SNX25	6.10206e-69	0.562974	0.446	0.245	1.66678e-64	BEC
SYNE2	7.35018e-69	0.485176	0.815	0.64	2.0077e-64	BEC
BCR	1.02526e-68	0.544832	0.278	0.116	2.8005e-64	BEC
NCK1	2.01213e-68	0.529552	0.31	0.139	5.49615e-64	BEC
FCHO2	3.30699e-68	0.48312	0.472	0.269	9.03306e-64	BEC
AFDN	7.85415e-68	0.558309	0.581	0.371	2.14536e-63	BEC
ABR	2.56719e-67	0.544569	0.37	0.186	7.01228e-63	BEC
PTPN12	3.11307e-67	0.588832	0.552	0.348	8.50334e-63	BEC
KIAA1671	5.49841e-67	0.393724	0.368	0.19	1.50189e-62	BEC
PARP9	2.16435e-66	0.511465	0.265	0.11	5.91193e-62	BEC
CALCOCO2	2.46394e-66	0.522377	0.376	0.191	6.73025e-62	BEC
NDST1	2.91236e-66	0.576179	0.272	0.116	7.95512e-62	BEC
NREP	2.5434e-65	0.845099	0.268	0.144	6.94731e-61	BEC
NR3C1	3.84747e-65	0.520632	0.376	0.193	1.05094e-60	BEC
PTGES3	4.55089e-65	0.873566	0.687	0.543	1.24308e-60	BEC
NASP	4.89435e-65	0.544598	0.348	0.171	1.33689e-60	BEC
ZC3HAV1	4.26112e-64	0.592874	0.393	0.208	1.16392e-59	BEC
TMOD3	5.42747e-64	0.520456	0.389	0.205	1.48251e-59	BEC
ZNF160	6.79857e-64	0.538239	0.337	0.164	1.85703e-59	BEC
RNF115	1.13504e-63	0.653895	0.444	0.256	3.10036e-59	BEC
GPBP1L1	3.54743e-63	0.563865	0.467	0.273	9.6898e-59	BEC
PDE3A	4.54734e-63	0.962717	0.359	0.19	1.2421e-58	BEC
NFATC3	5.45692e-63	0.740223	0.46	0.286	1.49056e-58	BEC
NUCB1	1.39667e-62	0.468424	0.327	0.159	3.81501e-58	BEC
AGTPBP1	2.23988e-62	0.609426	0.298	0.137	6.11823e-58	BEC
MT-ND5	3.12862e-62	0.426051	0.657	0.452	8.54581e-58	BEC
ZNF83	3.50905e-62	0.699185	0.522	0.348	9.58497e-58	BEC
TMEM87B	1.66334e-60	0.575941	0.306	0.146	4.54341e-56	BEC
AMOTL1	6.65649e-60	0.483729	0.268	0.118	1.81822e-55	BEC
HLA-B	8.21123e-60	0.612412	0.402	0.223	2.2429e-55	BEC
TBC1D8	1.02562e-59	0.410076	0.304	0.147	2.80149e-55	BEC
RDX	1.24215e-59	0.401825	0.591	0.392	3.39295e-55	BEC
HSPA4L	1.6419e-59	0.81881	0.314	0.161	4.48485e-55	BEC
IFNGR1	4.55695e-59	0.608803	0.308	0.149	1.24473e-54	BEC
SRGAP2	4.70117e-59	0.431909	0.383	0.208	1.28412e-54	BEC
RAP1B	1.0353e-58	0.681388	0.529	0.353	2.82793e-54	BEC
SPTBN1	5.85619e-58	0.410754	0.772	0.606	1.59962e-53	BEC
WDFY1	8.69086e-58	0.546808	0.328	0.165	2.37391e-53	BEC
PLSCR1	1.17904e-57	0.426464	0.421	0.241	3.22056e-53	BEC
HDGFL3	1.25231e-57	0.500931	0.353	0.184	3.42069e-53	BEC
IKBKB	1.62485e-57	0.519856	0.296	0.14	4.43827e-53	BEC
INO80D	1.90711e-57	0.568206	0.714	0.541	5.20928e-53	BEC
FCHSD2	3.00738e-57	0.464885	0.647	0.451	8.21467e-53	BEC
ZDHHC14	3.23493e-57	0.387683	0.37	0.204	8.83621e-53	BEC
RASGEF1B	3.91106e-57	0.611756	0.751	0.588	1.06831e-52	BEC
MAP1LC3B	5.67847e-57	0.574688	0.251	0.109	1.55107e-52	BEC
DEPP1	9.27228e-57	0.961164	0.294	0.146	2.53272e-52	BEC
BMP6	1.26005e-56	0.538282	0.284	0.134	3.44182e-52	BEC
ETS2	1.42013e-56	0.578729	0.262	0.117	3.8791e-52	BEC
MAST4	2.61424e-56	0.57212	0.676	0.494	7.14081e-52	BEC
COBLL1	4.02999e-56	0.756975	0.341	0.182	1.10079e-51	BEC
SCARB1	4.05111e-56	0.560828	0.451	0.268	1.10656e-51	BEC
PLS3	4.55946e-56	0.615948	0.384	0.212	1.24542e-51	BEC
DPYD	5.78229e-56	0.494748	0.687	0.502	1.57943e-51	BEC
CAMTA1	7.07703e-56	0.485801	0.587	0.393	1.93309e-51	BEC
SLC2A3	1.11198e-55	0.654528	0.288	0.137	3.03737e-51	BEC
SLC26A3	1.59404e-55	0.688049	0.623	0.441	4.35411e-51	BEC
MIR29B2CHG	3.88149e-55	0.532068	0.332	0.17	1.06023e-50	BEC
CHSY1	1.05408e-54	0.381326	0.502	0.316	2.87923e-50	BEC
NUFIP2	1.13722e-54	0.545689	0.488	0.308	3.10633e-50	BEC
WWP1	2.86213e-54	0.511564	0.562	0.375	7.81792e-50	BEC
ATP11C	4.88375e-54	0.521624	0.42	0.244	1.334e-49	BEC
SUGT1	5.59035e-54	0.624673	0.362	0.203	1.527e-49	BEC
HNRNPU	5.66093e-54	0.594684	0.673	0.523	1.54628e-49	BEC
AHNAK	8.24711e-54	0.295804	0.421	0.257	2.2527e-49	BEC
PKIG	9.05933e-54	0.388579	0.258	0.12	2.47456e-49	BEC
MT-ND4L	2.29516e-53	0.297577	0.528	0.353	6.26922e-49	BEC
MCPH1	2.61411e-53	0.501383	0.43	0.253	7.14045e-49	BEC
ETV6	2.94698e-53	0.417739	0.549	0.362	8.04967e-49	BEC
ANKS1A	3.41415e-53	0.6922	0.549	0.39	9.32574e-49	BEC
PLXNA2	5.24903e-53	0.376201	0.361	0.203	1.43377e-48	BEC
MT-ND4	2.41651e-52	0.277439	0.887	0.747	6.6007e-48	BEC
DCLK2	3.65545e-52	0.444258	0.304	0.154	9.98486e-48	BEC
ELF2	3.86573e-52	0.492347	0.611	0.427	1.05592e-47	BEC
MAP3K3	4.2755e-52	0.371529	0.362	0.203	1.16785e-47	BEC
P4HA1	4.66329e-52	0.761257	0.573	0.455	1.27378e-47	BEC
GLS	1.21821e-51	0.533574	0.556	0.375	3.32754e-47	BEC
NT5C2	1.51096e-51	0.585611	0.516	0.34	4.12719e-47	BEC
FAM214A	2.23549e-51	0.527982	0.439	0.265	6.10625e-47	BEC
KLF6	2.40637e-51	0.476801	0.459	0.282	6.573e-47	BEC
ENG	7.49605e-51	0.510345	0.437	0.264	2.04755e-46	BEC
KLHL5	8.0887e-51	0.610928	0.274	0.136	2.20943e-46	BEC
ARHGEF12	8.47422e-51	0.391325	0.644	0.46	2.31473e-46	BEC
N4BP2L1	8.49235e-51	0.412062	0.298	0.152	2.31968e-46	BEC
KAT6A	8.61874e-51	0.449379	0.641	0.461	2.35421e-46	BEC
RGL1	3.91837e-50	0.617342	0.398	0.233	1.0703e-45	BEC
HERC4	4.06821e-50	0.572472	0.664	0.515	1.11123e-45	BEC
NKTR	7.68022e-50	0.537316	0.628	0.47	2.09785e-45	BEC
IGFBP7	1.04346e-49	0.358919	0.748	0.573	2.85022e-45	BEC
SETX	1.15735e-49	0.469092	0.512	0.333	3.1613e-45	BEC
MERTK	1.58643e-49	0.333724	0.272	0.135	4.33333e-45	BEC
PPP3CA	5.24286e-49	0.539805	0.723	0.571	1.43209e-44	BEC
SPARC	1.7646e-48	0.354841	0.571	0.39	4.82001e-44	BEC
CLU	9.63805e-48	0.477035	0.269	0.133	2.63263e-43	BEC
RASSF3	1.3169e-47	0.411488	0.26	0.127	3.59711e-43	BEC
PARP14	1.32943e-47	0.301553	0.316	0.172	3.63134e-43	BEC
PRKD1	1.68088e-47	0.275406	0.588	0.413	4.59131e-43	BEC
LUZP1	1.83502e-47	0.432843	0.306	0.16	5.01237e-43	BEC
CPEB4	2.16689e-47	0.406385	0.35	0.2	5.91885e-43	BEC
EVA1C	9.74914e-47	0.359963	0.447	0.282	2.66298e-42	BEC
MYO9B	1.16514e-46	0.366717	0.302	0.159	3.18259e-42	BEC
BNIP2	1.37438e-46	0.350622	0.274	0.138	3.75412e-42	BEC
CTBP2	1.41443e-46	0.424848	0.719	0.561	3.86353e-42	BEC
EXOC5	3.09328e-46	0.453618	0.343	0.191	8.44929e-42	BEC
TRIM56	1.12057e-45	0.40772	0.352	0.2	3.06083e-41	BEC
SELENOW	2.41892e-45	0.386218	0.356	0.204	6.60729e-41	BEC
AHCTF1	2.95586e-45	0.548116	0.549	0.388	8.07393e-41	BEC
MTRNR2L8	4.09591e-45	0.560038	0.439	0.275	1.1188e-40	BEC
ITGB1	8.62347e-45	0.366359	0.592	0.418	2.3555e-40	BEC
TSC22D3	1.10477e-44	0.402744	0.349	0.2	3.01768e-40	BEC
HSP90AA1	1.2798e-44	0.609573	0.74	0.666	3.49578e-40	BEC
GNAI2	1.74744e-44	0.333639	0.283	0.149	4.77314e-40	BEC
C2CD2	2.08157e-44	0.407054	0.323	0.18	5.68581e-40	BEC
IFITM2	4.29958e-44	0.404286	0.335	0.189	1.17443e-39	BEC
FANCL	4.31668e-44	0.482739	0.321	0.177	1.1791e-39	BEC
CNKSR3	1.21638e-43	0.763886	0.343	0.207	3.32254e-39	BEC
B2M	1.25401e-43	0.294874	0.783	0.628	3.42532e-39	BEC
DENND1A	2.51081e-43	0.38618	0.627	0.456	6.85827e-39	BEC
CTNND1	2.72642e-43	0.383155	0.323	0.18	7.44722e-39	BEC
TMEM65	3.36296e-43	0.412871	0.336	0.193	9.18592e-39	BEC
CDR2	5.47104e-43	0.45463	0.355	0.206	1.49441e-38	BEC
ADAM10	6.85777e-43	0.424638	0.499	0.333	1.8732e-38	BEC
CHORDC1	6.93243e-43	0.612526	0.457	0.314	1.89359e-38	BEC
UACA	2.18238e-42	0.45105	0.566	0.398	5.96117e-38	BEC
HLA-A	3.01877e-42	0.3869	0.432	0.273	8.24576e-38	BEC
ZNF800	1.29523e-41	0.373698	0.314	0.175	3.53792e-37	BEC
INSR	1.52803e-41	0.464315	0.79	0.734	4.1738e-37	BEC
GATAD2A	3.556e-41	0.368873	0.29	0.157	9.7132e-37	BEC
STAU2	5.76738e-41	0.479541	0.38	0.23	1.57536e-36	BEC
CSNK1A1	7.30677e-41	0.39463	0.666	0.509	1.99584e-36	BEC
STAG1	9.88322e-41	0.36312	0.809	0.691	2.6996e-36	BEC
UVRAG	1.28883e-40	0.479571	0.508	0.347	3.52043e-36	BEC
FGFR1	2.45824e-40	0.494012	0.534	0.375	6.71469e-36	BEC
DIAPH1	3.25079e-40	0.379156	0.254	0.13	8.87953e-36	BEC
TMEM184B	3.25673e-40	0.374035	0.269	0.142	8.89576e-36	BEC
MIB1	4.92855e-40	0.541628	0.664	0.554	1.34623e-35	BEC
RASA2	5.81486e-40	0.340413	0.486	0.329	1.58833e-35	BEC
FMNL3	6.18606e-40	0.333157	0.262	0.14	1.68972e-35	BEC
DPYSL2	8.58982e-40	0.263004	0.351	0.216	2.34631e-35	BEC
TAPBP	1.00414e-39	0.364872	0.258	0.134	2.7428e-35	BEC
MGMT	1.34389e-39	0.405133	0.351	0.208	3.67085e-35	BEC
RNF144A	1.60577e-39	0.496653	0.337	0.197	4.38617e-35	BEC
NFKBIA	1.79333e-39	0.475221	0.344	0.203	4.89847e-35	BEC
NECTIN2	3.58312e-39	0.357709	0.3	0.168	9.7873e-35	BEC
CACYBP	1.57253e-38	0.396502	0.285	0.157	4.29538e-34	BEC
DENND4C	1.75895e-38	0.456682	0.506	0.349	4.80456e-34	BEC
SMURF2	2.23064e-38	0.387666	0.44	0.287	6.09299e-34	BEC
SLC39A10	4.38344e-38	0.384997	0.271	0.146	1.19734e-33	BEC
RB1	8.49496e-38	0.389466	0.536	0.378	2.3204e-33	BEC
TBC1D4	8.53008e-38	0.380768	0.552	0.393	2.32999e-33	BEC
NBDY	3.37993e-37	0.274838	0.305	0.179	9.23228e-33	BEC
MACF1	4.34735e-37	0.323203	0.819	0.706	1.18748e-32	BEC
RAPH1	4.78257e-37	0.505708	0.313	0.183	1.30636e-32	BEC
TNRC6B	6.75732e-37	0.345517	0.732	0.59	1.84576e-32	BEC
EXT1	7.57488e-37	0.437135	0.641	0.484	2.06908e-32	BEC
ZCCHC2	7.62518e-37	0.298701	0.31	0.183	2.08282e-32	BEC
RNF213	1.20904e-36	0.315341	0.396	0.253	3.30249e-32	BEC
GNAS	2.83254e-36	0.397863	0.635	0.488	7.73708e-32	BEC
XKR6	3.31581e-36	0.49477	0.262	0.141	9.05713e-32	BEC
ADAM9	5.21208e-36	0.420717	0.351	0.214	1.42368e-31	BEC
YPEL2	5.66871e-36	0.354547	0.301	0.174	1.54841e-31	BEC
CBL	6.03399e-36	0.33883	0.272	0.151	1.64818e-31	BEC
ITSN2	8.39515e-36	0.488438	0.527	0.382	2.29314e-31	BEC
ZHX3	1.38247e-35	0.437729	0.356	0.219	3.77621e-31	BEC
GOLPH3	1.4788e-35	0.447004	0.5	0.35	4.03934e-31	BEC
DNAJB1	1.6204e-35	0.488184	0.426	0.282	4.42612e-31	BEC
IQGAP1	2.05584e-35	0.287471	0.449	0.306	5.61553e-31	BEC
LINGO1	2.08084e-35	0.428632	0.557	0.406	5.68382e-31	BEC
HSPA4	2.13333e-35	0.58944	0.433	0.307	5.82718e-31	BEC
PPP3CC	3.04498e-35	0.411798	0.358	0.221	8.31736e-31	BEC
TBC1D5	3.12058e-35	0.33966	0.754	0.619	8.52388e-31	BEC
PIP4K2A	3.72559e-35	0.306798	0.34	0.209	1.01765e-30	BEC
HSP90AB1	4.56092e-35	0.451832	0.684	0.561	1.24581e-30	BEC
MYO1D	4.89814e-35	0.418615	0.468	0.32	1.33793e-30	BEC
PRKCE	7.27499e-35	0.279877	0.477	0.331	1.98716e-30	BEC
ATXN3	2.09039e-34	0.30854	0.37	0.236	5.70989e-30	BEC
ARFGEF2	4.60789e-34	0.399731	0.364	0.229	1.25864e-29	BEC
TRAK1	7.42283e-34	0.323621	0.283	0.163	2.02755e-29	BEC
PRKD3	7.92572e-34	0.336316	0.306	0.181	2.16491e-29	BEC
CRADD	1.03412e-33	0.456504	0.419	0.278	2.82469e-29	BEC
ZMYND8	1.31884e-33	0.389295	0.326	0.197	3.60241e-29	BEC
SRPK2	1.86189e-33	0.254922	0.583	0.435	5.08576e-29	BEC
MRPS6	2.09441e-33	0.427277	0.414	0.274	5.72088e-29	BEC
EIF2AK2	2.35268e-33	0.3823	0.391	0.253	6.42634e-29	BEC
PRRC2C	4.12485e-33	0.355557	0.63	0.484	1.1267e-28	BEC
MCL1	8.93184e-33	0.258024	0.293	0.175	2.43973e-28	BEC
KAT2B	1.1877e-32	0.251836	0.33	0.209	3.24421e-28	BEC
BTBD3	1.62838e-32	0.27924	0.255	0.145	4.44792e-28	BEC
JARID2	1.64522e-32	0.395246	0.493	0.348	4.49391e-28	BEC
KDM4C	2.07949e-32	0.276344	0.537	0.392	5.68012e-28	BEC
SPIDR	2.70382e-32	0.336719	0.684	0.541	7.38549e-28	BEC
MTUS1	3.31869e-32	0.407919	0.548	0.401	9.06499e-28	BEC
HMBOX1	4.63849e-32	0.480984	0.516	0.376	1.267e-27	BEC
RBFOX2	5.91597e-32	0.31371	0.699	0.56	1.61595e-27	BEC
DNAJA1	6.67789e-32	0.466379	0.437	0.298	1.82407e-27	BEC
ODF2L	1.07756e-31	0.417809	0.317	0.194	2.94335e-27	BEC
ZDHHC20	1.66381e-31	0.367152	0.297	0.177	4.5447e-27	BEC
AC007319.1	2.5739e-31	0.630655	0.292	0.181	7.03062e-27	BEC
NOD1	2.78249e-31	0.266685	0.306	0.188	7.60038e-27	BEC
BMP2K	2.92253e-31	0.300069	0.291	0.175	7.98289e-27	BEC
GNB1	3.30874e-31	0.312047	0.608	0.465	9.03783e-27	BEC
DICER1	4.86795e-31	0.326339	0.459	0.321	1.32968e-26	BEC
ADGRL2	5.66581e-31	0.399102	0.582	0.443	1.54762e-26	BEC
ATP1A1	6.07904e-31	0.552086	0.308	0.19	1.66049e-26	BEC
XPR1	8.75937e-31	0.281007	0.405	0.274	2.39262e-26	BEC
CSMD1	9.58372e-31	0.466574	0.287	0.17	2.61779e-26	BEC
NPTN	1.25805e-30	0.332233	0.377	0.247	3.43638e-26	BEC
NAA16	1.3631e-30	0.436354	0.437	0.304	3.72332e-26	BEC
NRIP1	1.5356e-30	0.448707	0.418	0.288	4.19449e-26	BEC
STIP1	1.59727e-30	0.452376	0.377	0.251	4.36295e-26	BEC
FGD6	1.88511e-30	0.260256	0.262	0.156	5.14919e-26	BEC
MOSMO	2.07475e-30	0.391866	0.341	0.215	5.66719e-26	BEC
NCOA3	5.30951e-30	0.342504	0.443	0.309	1.45029e-25	BEC
XRN2	9.01852e-30	0.384421	0.426	0.292	2.46341e-25	BEC
CSNK1G3	1.00101e-29	0.348089	0.336	0.213	2.73425e-25	BEC
SPRED2	1.41147e-29	0.338706	0.382	0.254	3.85544e-25	BEC
SPTAN1	1.84597e-29	0.309596	0.396	0.267	5.04227e-25	BEC
DPP8	3.11212e-29	0.310256	0.282	0.17	8.50077e-25	BEC
ESR2	6.00183e-29	0.696139	0.377	0.262	1.6394e-24	BEC
CDC27	7.77248e-29	0.327431	0.444	0.312	2.12305e-24	BEC
ROCK1	1.06961e-28	0.358398	0.582	0.446	2.92164e-24	BEC
BRWD1	2.11128e-28	0.324582	0.606	0.469	5.76697e-24	BEC
GPHN	2.18799e-28	0.309687	0.661	0.525	5.97649e-24	BEC
ZFAND3	3.18633e-28	0.3055	0.792	0.674	8.70347e-24	BEC
CLK1	3.28302e-28	0.404878	0.453	0.323	8.96758e-24	BEC
VTI1A	4.17645e-28	0.264636	0.528	0.392	1.1408e-23	BEC
MALT1	5.4385e-28	0.325138	0.259	0.153	1.48553e-23	BEC
ZBTB1	7.66148e-28	0.290316	0.298	0.186	2.09273e-23	BEC
RPS6KA5	7.70742e-28	0.520706	0.308	0.194	2.10528e-23	BEC
TRIM2	2.00058e-27	0.26959	0.297	0.188	5.46458e-23	BEC
FOSL2	4.23813e-27	0.292227	0.508	0.376	1.15765e-22	BEC
TAF15	7.99803e-27	0.258626	0.506	0.375	2.18466e-22	BEC
ZNF106	9.74962e-27	0.34171	0.338	0.221	2.66311e-22	BEC
KIF13A	9.98658e-27	0.383548	0.482	0.352	2.72783e-22	BEC
TLE1	1.02992e-26	0.37946	0.346	0.229	2.81324e-22	BEC
ENTPD1-AS1	1.07495e-26	0.554309	0.297	0.192	2.93623e-22	BEC
WAC	1.86909e-26	0.351903	0.686	0.567	5.10541e-22	BEC
UBE2H	2.36202e-26	0.261236	0.642	0.511	6.45185e-22	BEC
YBX3	2.5523e-26	0.331014	0.444	0.316	6.97161e-22	BEC
WNK1	4.2423e-26	0.321047	0.569	0.437	1.15878e-21	BEC
SH3KBP1	4.49197e-26	0.312393	0.259	0.157	1.22698e-21	BEC
RICTOR	8.30312e-26	0.388622	0.454	0.328	2.268e-21	BEC
STK24	9.21371e-26	0.354056	0.371	0.251	2.51673e-21	BEC
ASPH	1.49467e-25	0.370637	0.418	0.294	4.0827e-21	BEC
AZIN1	1.6274e-25	0.292309	0.299	0.191	4.44524e-21	BEC
ADD1	1.73891e-25	0.291424	0.518	0.388	4.74983e-21	BEC
NDRG1	2.09273e-25	0.341916	0.383	0.267	5.71628e-21	BEC
ATF7IP2	2.60245e-25	0.301207	0.273	0.17	7.1086e-21	BEC
NCKAP1	2.65988e-25	0.285018	0.548	0.418	7.26547e-21	BEC
GPBP1	3.26559e-25	0.416727	0.669	0.575	8.91995e-21	BEC
SNX3	3.6363e-25	0.383605	0.397	0.277	9.93255e-21	BEC
OGT	3.8685e-25	0.258334	0.419	0.298	1.05668e-20	BEC
WDR60	5.89123e-25	0.346113	0.355	0.239	1.60919e-20	BEC
ANKRD17	6.16861e-25	0.31304	0.675	0.552	1.68495e-20	BEC
HACE1	7.18526e-25	0.312513	0.308	0.201	1.96265e-20	BEC
DUSP1	1.13618e-24	0.264814	0.484	0.358	3.10348e-20	BEC
SEC24B	1.1855e-24	0.250461	0.466	0.344	3.2382e-20	BEC
SECISBP2L	1.53353e-24	0.382847	0.339	0.226	4.18883e-20	BEC
OSBPL3	2.21835e-24	0.251917	0.326	0.22	6.05942e-20	BEC
MYCBP2	2.43493e-24	0.250697	0.659	0.533	6.65101e-20	BEC
KTN1	2.54101e-24	0.275447	0.681	0.556	6.94078e-20	BEC
DIP2B	3.95011e-24	0.411073	0.598	0.482	1.07897e-19	BEC
MYO6	5.15701e-24	0.320689	0.331	0.221	1.40864e-19	BEC
PAN3	1.19904e-23	0.282535	0.623	0.498	3.27517e-19	BEC
RAB3GAP1	1.20173e-23	0.263535	0.484	0.363	3.28254e-19	BEC
SLC30A7	1.2974e-23	0.321203	0.259	0.16	3.54384e-19	BEC
USP13	2.1564e-23	0.485552	0.294	0.195	5.89019e-19	BEC
PCED1B	2.58656e-23	0.357626	0.287	0.184	7.06518e-19	BEC
MT-CO1	5.25369e-23	0.382808	0.803	0.718	1.43505e-18	BEC
FXR1	8.69043e-23	0.391105	0.594	0.513	2.37379e-18	BEC
CLASP1	9.12987e-23	0.293897	0.66	0.545	2.49382e-18	BEC
GPX3	1.28007e-22	0.290724	0.303	0.202	3.49652e-18	BEC
TSHZ1	2.9406e-22	0.430314	0.429	0.317	8.03225e-18	BEC
CCT4	5.78957e-22	0.309097	0.401	0.288	1.58142e-17	BEC
PDS5B	1.28706e-21	0.300811	0.626	0.509	3.51561e-17	BEC
LRIG1	2.5918e-21	0.360392	0.297	0.197	7.07952e-17	BEC
CNN3	3.57628e-21	0.328466	0.45	0.335	9.7686e-17	BEC
TENT4A	4.92174e-21	0.294896	0.268	0.175	1.34437e-16	BEC
CLIP2	1.04734e-20	0.260858	0.282	0.187	2.8608e-16	BEC
ARHGAP5	1.05414e-20	0.37843	0.516	0.408	2.87938e-16	BEC
CORO1C	1.97003e-20	0.278397	0.277	0.182	5.38113e-16	BEC
SERPINH1	2.15665e-20	0.26194	0.439	0.327	5.89088e-16	BEC
NOP58	2.43732e-20	0.362419	0.39	0.284	6.65754e-16	BEC
SERPINB6	3.30938e-20	0.267693	0.308	0.209	9.03958e-16	BEC
AGAP1	3.51952e-20	0.268896	0.557	0.441	9.61356e-16	BEC
ANKRD12	4.8029e-20	0.253466	0.654	0.541	1.31191e-15	BEC
ERC1	7.23743e-20	0.257671	0.663	0.551	1.9769e-15	BEC
UBR1	7.43923e-20	0.270071	0.472	0.36	2.03203e-15	BEC
PIKFYVE	7.81559e-19	0.276616	0.338	0.238	2.13483e-14	BEC
GAB1	4.43977e-18	0.466112	0.525	0.422	1.21272e-13	BEC
EPB41	5.7004e-18	0.316248	0.301	0.208	1.55707e-13	BEC
MTM1	3.83996e-17	0.281502	0.283	0.194	1.04888e-12	BEC
AC105402.3	6.50054e-17	0.500428	0.388	0.354	1.77562e-12	BEC
TMEM161B-AS1	7.19151e-17	0.338577	0.285	0.197	1.96436e-12	BEC
ARRDC3	7.48139e-17	0.274403	0.258	0.175	2.04354e-12	BEC
HERC1	3.52344e-15	0.30441	0.532	0.432	9.62429e-11	BEC
EXOC2	3.94156e-15	0.250635	0.278	0.195	1.07664e-10	BEC
NCOA1	9.25724e-15	0.263345	0.716	0.629	2.52862e-10	BEC
LRP6	1.20096e-13	0.273695	0.348	0.262	3.28043e-09	BEC
ARL17B	2.00372e-13	0.300089	0.259	0.183	5.47315e-09	BEC
MEF2A	4.23354e-13	0.263009	0.566	0.474	1.15639e-08	BEC
SYNE1	1.34683e-12	0.351724	0.556	0.472	3.67885e-08	BEC
ITPR2	1.91472e-09	0.293298	0.547	0.47	5.23005e-05	BEC
AKAP12	1.70779e-08	0.393373	0.381	0.453	0.000466483	BEC
TNFAIP3	3.35155e-08	0.418574	0.251	0.193	0.000915476	BEC
PWRN1	0	3.61487	0.835	0.075	0	GC
RUNX2	0	3.52929	0.554	0.114	0	GC
NR5A2	0	3.13123	0.896	0.08	0	GC
LINGO2	0	3.0929	0.757	0.026	0	GC
SPHKAP	0	2.94475	0.782	0.026	0	GC
FHOD3	0	2.90186	0.918	0.17	0	GC
GPC5	0	2.81593	0.687	0.063	0	GC
GRID2	0	2.67657	0.492	0.049	0	GC
NAV2	0	2.62661	0.835	0.164	0	GC
ERI2	0	2.50795	0.46	0.084	0	GC
GRAMD1B	0	2.49668	0.739	0.164	0	GC
HMGA2	0	2.48694	0.711	0.057	0	GC
ATRNL1	0	2.46702	0.945	0.376	0	GC
SORBS2	0	2.43143	0.769	0.19	0	GC
RIMS2	0	2.42765	0.75	0.054	0	GC
ULK4	0	2.39687	0.894	0.226	0	GC
ANKRD55	0	2.38537	0.495	0.023	0	GC
CDH2	0	2.3557	0.854	0.142	0	GC
ALCAM	0	2.29265	0.663	0.186	0	GC
ADAMTS6	0	2.23327	0.491	0.084	0	GC
AC090673.1	0	2.22412	0.455	0.091	0	GC
PRKAR2B	0	2.17986	0.846	0.147	0	GC
PHEX	0	2.10198	0.717	0.038	0	GC
CMTM8	0	2.09225	0.746	0.052	0	GC
AC013652.1	0	2.07714	0.559	0.027	0	GC
RBFOX1	0	2.05866	0.62	0.102	0	GC
ZNF431	0	2.02438	0.749	0.303	0	GC
GLIDR	0	2.00638	0.46	0.047	0	GC
GRIK2	0	1.98279	0.709	0.067	0	GC
AC022075.1	0	1.98196	0.61	0.082	0	GC
FSHR	0	1.97675	0.557	0.031	0	GC
LGR4	0	1.97377	0.799	0.189	0	GC
CSMD3	0	1.97349	0.419	0.012	0	GC
ARHGEF28	0	1.93432	0.895	0.334	0	GC
P3H2	0	1.92611	0.868	0.236	0	GC
CSGALNACT1	0	1.9173	0.862	0.186	0	GC
NPNT	0	1.8898	0.407	0.042	0	GC
ZNF385B	0	1.85659	0.547	0.038	0	GC
AL390729.1	0	1.84719	0.499	0.011	0	GC
HUWE1	0	1.84443	0.876	0.39	0	GC
RUNX1	0	1.83556	0.686	0.12	0	GC
GRB14	0	1.82691	0.724	0.081	0	GC
TANC2	0	1.8252	0.865	0.272	0	GC
DPP10	0	1.81922	0.49	0.023	0	GC
LINC00937	0	1.81034	0.69	0.065	0	GC
PRLR	0	1.77805	0.786	0.19	0	GC
ERBB4	0	1.75586	0.529	0.03	0	GC
CADM1	0	1.75071	0.689	0.103	0	GC
NR6A1	0	1.74873	0.761	0.093	0	GC
DIAPH3	0	1.74269	0.425	0.03	0	GC
ABCA5	0	1.72645	0.649	0.146	0	GC
MIR4713HG	0	1.72313	0.311	0.024	0	GC
RGS7	0	1.70942	0.449	0.024	0	GC
RMDN2	0	1.70686	0.519	0.073	0	GC
MYO5B	0	1.69424	0.56	0.011	0	GC
RMDN2-AS1	0	1.67822	0.402	0.028	0	GC
VCAN	0	1.66108	0.457	0.044	0	GC
TJP1	0	1.64651	0.866	0.35	0	GC
FAM85B	0	1.61943	0.791	0.272	0	GC
PDGFC	0	1.61779	0.792	0.216	0	GC
JAKMIP2	0	1.59886	0.479	0.025	0	GC
SLC1A3	0	1.58521	0.404	0.042	0	GC
MYO10	0	1.56877	0.808	0.255	0	GC
AC123912.4	0	1.55825	0.515	0.024	0	GC
STK17B	0	1.5527	0.516	0.054	0	GC
FRMD5	0	1.55184	0.537	0.042	0	GC
IGF2BP2	0	1.541	0.627	0.054	0	GC
KCNQ1	0	1.53857	0.742	0.13	0	GC
ST6GAL2	0	1.5037	0.362	0.023	0	GC
DACH2	0	1.48022	0.403	0.026	0	GC
GLDN	0	1.47051	0.408	0.018	0	GC
CTNNA2	0	1.43832	0.343	0.021	0	GC
NPR3	0	1.42861	0.541	0.052	0	GC
VWC2	0	1.41824	0.514	0.094	0	GC
XKR6	0	1.41084	0.702	0.112	0	GC
SAMD3	0	1.40179	0.528	0.07	0	GC
NELL2	0	1.38903	0.342	0.014	0	GC
CHD7	0	1.37668	0.655	0.076	0	GC
AFF2	0	1.36753	0.599	0.106	0	GC
CACNA2D1	0	1.3432	0.887	0.415	0	GC
SIPA1L1	0	1.33717	0.835	0.267	0	GC
HS6ST1	0	1.33635	0.547	0.081	0	GC
DSP	0	1.32684	0.409	0.032	0	GC
ST8SIA1	0	1.3251	0.427	0.045	0	GC
SEMA3A	0	1.32033	0.434	0.063	0	GC
SLC44A5	0	1.31529	0.41	0.043	0	GC
SNRPN	0	1.31398	0.465	0.017	0	GC
LPIN2	0	1.31135	0.743	0.183	0	GC
HECW2	0	1.31084	0.521	0.052	0	GC
CHSY3	0	1.31043	0.581	0.111	0	GC
BMPR1B	0	1.30494	0.841	0.258	0	GC
ERMP1	0	1.2954	0.618	0.102	0	GC
PWRN3	0	1.2928	0.385	0.011	0	GC
ACSL4	0	1.28272	0.762	0.259	0	GC
ARHGAP42	0	1.27948	0.696	0.117	0	GC
LIPE-AS1	0	1.27616	0.601	0.098	0	GC
TENM3	0	1.27209	0.542	0.065	0	GC
MPPED2	0	1.27102	0.429	0.021	0	GC
PARM1	0	1.26272	0.426	0.03	0	GC
FHIT	0	1.25707	0.886	0.369	0	GC
FST	0	1.2501	0.343	0.019	0	GC
AC111152.2	0	1.24813	0.319	0.006	0	GC
CASR	0	1.2478	0.274	0.006	0	GC
GRIP1	0	1.24635	0.655	0.107	0	GC
HMGCR	0	1.22287	0.532	0.109	0	GC
LAMA1	0	1.21195	0.637	0.079	0	GC
AC145124.1	0	1.20555	0.426	0.042	0	GC
SLC16A1	0	1.1927	0.509	0.054	0	GC
AC004784.1	0	1.18651	0.42	0.011	0	GC
AC010127.1	0	1.18622	0.392	0.02	0	GC
TMEM108	0	1.17592	0.413	0.013	0	GC
CCDC84	0	1.17163	0.583	0.125	0	GC
OCA2	0	1.16447	0.337	0.009	0	GC
CACNB4	0	1.16052	0.404	0.045	0	GC
NLK	0	1.15289	0.747	0.245	0	GC
ITGA2	0	1.1497	0.473	0.032	0	GC
ANKRD30BL	0	1.14385	0.449	0.024	0	GC
TSHZ2	0	1.14017	0.975	0.623	0	GC
THSD7A	0	1.13986	0.579	0.136	0	GC
KIF21A	0	1.13919	0.604	0.082	0	GC
DOK5	0	1.13693	0.42	0.047	0	GC
AC006148.1	0	1.12673	0.346	0.009	0	GC
MYO1B	0	1.12066	0.673	0.178	0	GC
SCN9A	0	1.1061	0.442	0.023	0	GC
ASTN2	0	1.10182	0.417	0.053	0	GC
AL391117.1	0	1.09331	0.368	0.014	0	GC
FRMD4B	0	1.09093	0.62	0.136	0	GC
MTMR2	0	1.08676	0.629	0.161	0	GC
CCND2	0	1.06503	0.48	0.066	0	GC
AC127526.1	0	1.06243	0.472	0.058	0	GC
AC099066.2	0	1.06235	0.328	0.018	0	GC
ATF7IP2	0	1.05999	0.632	0.146	0	GC
PPP1R13L	0	1.04583	0.363	0.032	0	GC
SLC46A3	0	1.03032	0.443	0.032	0	GC
PRSS23	0	1.02669	0.774	0.232	0	GC
PLS1	0	1.02043	0.347	0.014	0	GC
CEACAM21	0	1.00664	0.356	0.01	0	GC
AC104035.1	0	0.993702	0.282	0.007	0	GC
TRANK1	0	0.983225	0.579	0.119	0	GC
CACNA1D	0	0.981788	0.402	0.04	0	GC
RGN	0	0.978367	0.45	0.044	0	GC
AC087463.4	0	0.962398	0.348	0.02	0	GC
AL590434.1	0	0.961546	0.317	0.009	0	GC
TBC1D32	0	0.955282	0.681	0.178	0	GC
RALGAPA2	0	0.945573	0.858	0.34	0	GC
PSG8	0	0.941785	0.335	0.008	0	GC
UBA6-AS1	0	0.924026	0.498	0.089	0	GC
MAP3K13	0	0.912788	0.657	0.183	0	GC
MPP6	0	0.90171	0.649	0.189	0	GC
LRRC8B	0	0.89732	0.454	0.06	0	GC
AP000462.1	0	0.890915	0.282	0.009	0	GC
AL357793.1	0	0.885067	0.29	0.016	0	GC
IGSF11	0	0.879631	0.566	0.128	0	GC
USP6NL	0	0.876691	0.641	0.166	0	GC
TMEM150C	0	0.867673	0.477	0.073	0	GC
STK4	0	0.867433	0.636	0.155	0	GC
C1orf141	0	0.862757	0.37	0.014	0	GC
PRKCQ	0	0.862151	0.365	0.021	0	GC
EPDR1	0	0.860145	0.467	0.082	0	GC
AC123912.1	0	0.859535	0.384	0.029	0	GC
FAM153B	0	0.857369	0.401	0.043	0	GC
HSD17B1	0	0.822909	0.441	0.055	0	GC
AC097103.2	0	0.818512	0.592	0.14	0	GC
ZNF98	0	0.817209	0.744	0.253	0	GC
JAKMIP2-AS1	0	0.813584	0.307	0.01	0	GC
TVP23A	0	0.807317	0.43	0.051	0	GC
JCAD	0	0.803403	0.419	0.04	0	GC
GPR63	0	0.799064	0.345	0.029	0	GC
CCDC69	0	0.791539	0.439	0.061	0	GC
GSTA4	0	0.786656	0.571	0.138	0	GC
AC092902.3	0	0.778714	0.341	0.026	0	GC
HS2ST1	0	0.772308	0.566	0.135	0	GC
CRNDE	0	0.763309	0.41	0.036	0	GC
KCTD8	0	0.744061	0.483	0.108	0	GC
MCF2L2	0	0.734323	0.399	0.044	0	GC
PLCB4	0	0.733974	0.574	0.123	0	GC
C15orf41	0	0.731148	0.551	0.136	0	GC
AC114760.2	0	0.724958	0.267	0.01	0	GC
ABO	0	0.718283	0.712	0.231	0	GC
PLEKHH1	0	0.686038	0.3	0.009	0	GC
LIPH	0	0.67835	0.279	0.012	0	GC
CEACAM1	0	0.671639	0.324	0.025	0	GC
LEPROTL1	0	0.671611	0.53	0.115	0	GC
PPP1R9A	0	0.657121	0.724	0.244	0	GC
NUP210	0	0.655213	0.309	0.015	0	GC
MIR181A2HG	0	0.654805	0.358	0.035	0	GC
OLA1	0	0.648807	0.611	0.18	0	GC
MAP3K15	0	0.640945	0.3	0.021	0	GC
CEP192	0	0.630082	0.67	0.224	0	GC
L3MBTL4	0	0.623997	0.701	0.252	0	GC
STK33	0	0.615043	0.585	0.146	0	GC
SUSD1	0	0.597648	0.343	0.036	0	GC
ERVE-1	0	0.596836	0.275	0.005	0	GC
GRIN2C	0	0.593279	0.256	0.007	0	GC
TMEM229B	0	0.51474	0.259	0.009	0	GC
MYEF2	0	0.507829	0.27	0.013	0	GC
FAM49B	0	0.491494	0.531	0.134	0	GC
MYRIP	0	0.320177	0.482	0.118	0	GC
PLXDC2	4.94065645841247e-324	1.28992	0.911	0.492	1.34954031161536e-319	GC
ZSWIM5	4.94065645841247e-324	0.955387	0.742	0.262	1.34954031161536e-319	GC
TRUB1	4.94065645841247e-324	0.603352	0.424	0.072	1.34954031161536e-319	GC
BCAR3	1.97626258336499e-323	0.655889	0.511	0.12	5.39816124646146e-319	GC
TAPT1-AS1	4.49599737715534e-322	0.636648	0.557	0.15	1.22808168356998e-317	GC
EZH2	3.50292542901444e-321	0.813063	0.408	0.059	9.56824080935294e-317	GC
SEMA6D	6.1748324417239e-320	0.914363	0.502	0.104	1.68665548145688e-315	GC
ANK3	3.8562811789201e-319	1.36952	0.863	0.41	1.05334320402202e-314	GC
GCLC	1.03587285504013e-318	0.638533	0.468	0.093	2.82948670354212e-314	GC
BTC	4.1213266471568e-317	0.658482	0.278	0.019	1.12574037367088e-312	GC
E2F3	1.0708485032077e-316	0.695391	0.383	0.051	2.92502268651184e-312	GC
PRKCA	1.08241423413089e-316	1.2945	0.909	0.522	2.95661448052854e-312	GC
PDE7B	2.45305485431602e-316	1.09853	0.878	0.403	6.70051933456422e-312	GC
TSPAN12	9.2823947821738e-316	0.990782	0.43	0.068	2.53548613475077e-311	GC
BCL11A	2.32490720982998e-315	0.754857	0.259	0.012	6.35048404365059e-311	GC
EYA4	2.97774722440914e-315	0.963428	0.363	0.042	8.13371654347357e-311	GC
CSRNP3	3.53599227718751e-313	0.557307	0.629	0.212	0	GC
GRIK1	5.69464971014909e-313	0.798558	0.351	0.04	0	GC
AC066613.2	2.40189071341945e-312	0.705495	0.261	0.012	6.56076e-308	GC
AC100800.1	3.43515449406752e-312	0.832985	0.351	0.038	9.38312e-308	GC
WASF1	9.42700811895103e-312	0.626132	0.529	0.137	2.57499e-307	GC
ATRN	3.72715264316354e-311	0.777867	0.679	0.224	1.01807e-306	GC
GREB1L	0	0.979878	0.815	0.336	4.95284e-305	GC
PRKCA-AS1	0	1.29072	0.419	0.062	2.13305e-304	GC
IVNS1ABP	0	1.01584	0.595	0.155	2.59504e-304	GC
KLHL3	1.96477e-307	0.682764	0.402	0.063	5.36677e-303	GC
MYO6	7.11413e-307	0.828465	0.649	0.201	1.94323e-302	GC
FARP1	9.63728e-307	0.500718	0.607	0.199	2.63242e-302	GC
GPATCH2	6.2246e-306	0.549466	0.501	0.125	1.70025e-301	GC
PCLO	2.30877e-305	0.636233	0.315	0.031	6.30641e-301	GC
DGLUCY	8.36018e-304	0.468985	0.479	0.12	2.28358e-299	GC
PRKD1	4.49484e-303	0.936046	0.867	0.395	1.22777e-298	GC
CAMTA1	1.21386e-302	1.07364	0.851	0.377	3.31566e-298	GC
MAGI1	2.63076e-302	0.375727	0.903	0.457	7.18593e-298	GC
SUPT20H	3.05444e-302	1.77703	0.643	0.203	8.3432e-298	GC
AKAP7	3.22379e-302	0.588209	0.458	0.103	8.80578e-298	GC
CHN1	1.09231e-301	0.486022	0.409	0.084	2.98365e-297	GC
SLC2A14	2.07701e-301	0.677372	0.383	0.061	5.67336e-297	GC
CD47	2.94539e-301	0.939062	0.714	0.246	8.04534e-297	GC
RHBDD1	4.21785e-301	0.683894	0.672	0.237	1.15211e-296	GC
TRPC1	1.39485e-300	1.30145	0.762	0.287	3.81003e-296	GC
SOBP	3.10613e-298	1.10651	0.751	0.28	8.4844e-294	GC
YPEL2	5.17732e-298	1.34988	0.587	0.155	1.41418e-293	GC
HMGCS1	2.13155e-297	0.985493	0.495	0.11	5.82233e-293	GC
AP000919.2	1.05378e-296	0.754408	0.301	0.025	2.87839e-292	GC
TRABD2A	2.27325e-296	0.582302	0.35	0.054	6.20938e-292	GC
PPHLN1	2.34467e-296	0.833998	0.75	0.286	6.40448e-292	GC
DCLK1	5.80944e-296	1.52854	0.645	0.196	1.58685e-291	GC
POT1-AS1	2.6192e-295	0.879546	0.367	0.048	7.15435e-291	GC
INHBB	3.15094e-295	1.37019	0.25	0.012	8.6068e-291	GC
LINC00882	6.32673e-295	0.677974	0.524	0.14	1.72815e-290	GC
MAML2	2.91999e-294	1.15604	0.936	0.536	7.97596e-290	GC
KCNK15-AS1	8.49647e-294	0.956775	0.309	0.027	2.32081e-289	GC
R3HDM1	1.52565e-293	0.433329	0.642	0.239	4.16731e-289	GC
FANK1	6.54708e-293	0.951186	0.501	0.109	1.78833e-288	GC
AC008892.1	1.35749e-292	1.27365	0.365	0.045	3.70799e-288	GC
VEGFA	1.75728e-292	0.762418	0.424	0.076	4.80002e-288	GC
ATP11A	2.65183e-291	0.734105	0.691	0.245	7.24346e-287	GC
DOCK10	1.27868e-290	1.18665	0.86	0.395	3.49273e-286	GC
ARHGAP18	2.59879e-290	0.466206	0.458	0.113	7.09858e-286	GC
LIMCH1	4.76033e-290	0.732253	0.559	0.157	1.30028e-285	GC
LRRC8C-DT	6.1514e-290	0.522853	0.282	0.025	1.68026e-285	GC
EXT1	2.06547e-289	1.11409	0.908	0.467	5.64183e-285	GC
AC009975.1	4.12219e-289	0.840662	0.341	0.044	1.12598e-284	GC
NREP	2.93216e-288	0.434972	0.48	0.13	8.0092e-284	GC
ARHGEF6	1.69577e-286	0.901893	0.456	0.088	4.63199e-282	GC
RNF144A	6.13131e-286	0.478642	0.565	0.183	1.67477e-281	GC
C3orf67	1.04576e-285	0.642864	0.291	0.026	2.8565e-281	GC
NDFIP1	1.29072e-285	1.02903	0.757	0.293	3.52559e-281	GC
WASF3	3.49824e-285	1.07559	0.516	0.119	9.55545e-281	GC
KTN1	3.78593e-285	1.04882	0.917	0.541	1.03413e-280	GC
PAPPA	5.64382e-285	1.30539	0.339	0.038	1.54161e-280	GC
AL359710.1	1.77139e-284	0.56419	0.329	0.045	4.83854e-280	GC
ITGA6	4.52581e-284	1.04102	0.492	0.11	1.23622e-279	GC
ZNF429	6.34768e-284	0.701109	0.468	0.105	1.73387e-279	GC
ENAH	2.77478e-282	1.34733	0.855	0.436	7.57932e-278	GC
LCMT1	4.05161e-282	0.827766	0.495	0.115	1.1067e-277	GC
KIAA1217	4.24727e-282	1.20928	0.643	0.201	1.16014e-277	GC
MPHOSPH6	4.44652e-282	0.741366	0.391	0.063	1.21457e-277	GC
RFX7	2.79692e-281	0.413218	0.601	0.221	7.63978e-277	GC
SMCO4	5.43715e-281	0.415223	0.331	0.053	1.48516e-276	GC
GJA1	8.45944e-281	0.64143	0.679	0.247	2.3107e-276	GC
RAPGEF4	1.23442e-280	0.500438	0.501	0.143	3.3718e-276	GC
LIPE	1.92495e-280	0.459627	0.254	0.019	5.25801e-276	GC
AC015923.1	3.63768e-278	1.03524	0.359	0.047	9.93631e-274	GC
PLA2G16	4.08308e-278	0.734464	0.511	0.132	1.11529e-273	GC
AC002070.1	1.10636e-277	0.833337	0.302	0.029	3.02203e-273	GC
ARHGAP28	2.45084e-277	0.761599	0.508	0.134	6.69448e-273	GC
STARD4-AS1	1.19248e-276	0.710169	0.362	0.056	3.25726e-272	GC
STPG2	4.65451e-276	0.690691	0.445	0.1	1.27138e-271	GC
HMCN1	6.69164e-276	1.19914	0.422	0.075	1.82782e-271	GC
DLEU2	3.77495e-275	0.254041	0.604	0.247	1.03113e-270	GC
CDK6	8.45194e-274	0.62415	0.534	0.156	2.30865e-269	GC
HIF1A	1.28782e-273	1.00449	0.837	0.387	3.51769e-269	GC
GSR	1.78958e-273	0.577348	0.43	0.094	4.88824e-269	GC
FAT1	2.14089e-273	0.657248	0.436	0.094	5.84785e-269	GC
PPP1R12B	1.42343e-272	1.11245	0.867	0.427	3.88811e-268	GC
DPF3	1.50452e-272	1.26621	0.505	0.117	4.10958e-268	GC
LMBR1L	1.87754e-272	1.0894	0.474	0.1	5.12851e-268	GC
TPD52	5.61701e-272	0.622733	0.313	0.039	1.53429e-267	GC
CMTM4	1.28333e-271	0.724807	0.356	0.053	3.50541e-267	GC
DERA	1.40279e-271	0.567558	0.41	0.087	3.83173e-267	GC
REXO5	5.81375e-271	1.0049	0.317	0.034	1.58803e-266	GC
AC008014.1	2.70606e-270	1.02959	0.627	0.203	7.39159e-266	GC
FAM168A	3.3315e-270	1.03478	0.672	0.233	9.09998e-266	GC
LMBR1	3.56105e-269	0.520481	0.75	0.333	9.72701e-265	GC
FASTKD1	6.46832e-269	0.466125	0.345	0.057	1.76682e-264	GC
MARK1	9.65809e-269	0.583291	0.31	0.04	2.63811e-264	GC
PSD3	1.33976e-268	1.21105	0.924	0.624	3.65956e-264	GC
SMS	1.50553e-268	0.890375	0.63	0.207	4.11236e-264	GC
METAP2	1.52215e-268	0.534414	0.602	0.205	4.15776e-264	GC
DUSP16	5.94651e-268	1.09437	0.663	0.225	1.62429e-263	GC
DNAH14	1.0591e-267	0.797816	0.573	0.171	2.89292e-263	GC
WWOX	1.19083e-267	1.02661	0.929	0.52	3.25275e-263	GC
TTC39C	2.40914e-267	0.445899	0.42	0.102	6.58058e-263	GC
PLEKHM3	7.04031e-267	0.616596	0.484	0.125	1.92306e-262	GC
VPS41	7.08223e-267	0.275968	0.589	0.237	1.93451e-262	GC
NPC1	9.08535e-267	0.525517	0.467	0.125	2.48166e-262	GC
DLG5	2.53931e-266	0.750637	0.6	0.193	6.93614e-262	GC
ATP8A1	1.50173e-265	0.673148	0.569	0.186	4.10197e-261	GC
USP48	1.72948e-265	0.565049	0.725	0.305	4.72407e-261	GC
APPL2	3.08441e-263	0.686712	0.608	0.201	8.42506e-259	GC
RANBP17	3.67883e-263	0.816087	0.477	0.113	1.00487e-258	GC
C2CD2	5.3763e-263	0.614079	0.542	0.166	1.46854e-258	GC
SLC16A1-AS1	6.42302e-263	0.450479	0.578	0.209	1.75445e-258	GC
C12orf75	1.72641e-262	0.484937	0.292	0.037	4.71568e-258	GC
TMEM181	1.09793e-261	0.518899	0.514	0.154	2.999e-257	GC
ZNF83	3.75378e-261	0.385039	0.723	0.336	1.02534e-256	GC
SERGEF	3.91424e-261	0.473354	0.523	0.17	1.06917e-256	GC
DMGDH	9.19953e-261	0.575359	0.341	0.055	2.51285e-256	GC
FOCAD	6.45667e-260	0.276124	0.603	0.244	1.76364e-255	GC
RAD18	1.72955e-259	0.518824	0.38	0.078	4.72426e-255	GC
PTPN4	6.32632e-259	0.372309	0.59	0.231	1.72803e-254	GC
SCARB1	8.51313e-259	1.31117	0.689	0.253	2.32536e-254	GC
ATR	1.26775e-258	0.420086	0.531	0.179	3.46286e-254	GC
AC006504.5	7.25003e-258	0.442918	0.274	0.031	1.98034e-253	GC
MTHFD2L	2.73154e-257	0.391197	0.399	0.099	7.4612e-253	GC
AF117829.1	3.01618e-257	0.325438	0.559	0.212	8.23868e-253	GC
TTC8	2.09319e-256	0.553731	0.603	0.224	5.71756e-252	GC
FAM182B	3.02387e-256	0.682702	0.475	0.124	8.2597e-252	GC
PABPN1	5.82567e-256	0.364498	0.411	0.104	1.59128e-251	GC
AC010735.2	8.92042e-256	0.644332	0.326	0.046	2.43661e-251	GC
ZNF160	1.21902e-255	0.618983	0.52	0.154	3.32975e-251	GC
GRK4	2.48061e-255	0.533802	0.41	0.094	6.77579e-251	GC
TRIM73	5.10409e-255	0.368698	0.282	0.039	1.39418e-250	GC
C20orf194	7.73559e-255	0.677135	0.741	0.318	2.11298e-250	GC
UBA6	3.57544e-254	0.422885	0.579	0.216	9.7663e-250	GC
HSPG2	8.64662e-254	0.946169	0.579	0.175	2.36183e-249	GC
FCHSD2	8.95106e-254	0.963857	0.862	0.439	2.44498e-249	GC
AHCYL2	2.10258e-253	0.387682	0.613	0.25	5.74321e-249	GC
AC010168.1	4.0185e-253	0.523838	0.25	0.023	1.09765e-248	GC
ZNF680	1.82953e-252	0.36262	0.531	0.188	4.99737e-248	GC
PTS	5.75361e-252	0.666264	0.509	0.143	1.5716e-247	GC
BMPR2	2.1398e-251	1.02463	0.831	0.397	5.84487e-247	GC
AL138828.1	7.75608e-251	1.51854	0.501	0.129	2.11857e-246	GC
GSTCD	1.54703e-250	0.508286	0.317	0.05	4.22571e-246	GC
PHACTR2	3.79867e-250	0.314186	0.598	0.243	1.03761e-245	GC
ZKSCAN1	8.76187e-250	0.312718	0.486	0.163	2.3933e-245	GC
KLHL13	1.03414e-249	0.685215	0.459	0.122	2.82475e-245	GC
HTT	8.65668e-249	0.478492	0.582	0.214	2.36457e-244	GC
HERC2	4.77492e-248	0.875797	0.854	0.431	1.30427e-243	GC
PGM1	2.50099e-246	0.572873	0.41	0.095	6.83146e-242	GC
SUPT3H	2.75446e-245	1.14428	0.789	0.368	7.52381e-241	GC
RAPGEF2	5.56332e-245	0.70103	0.775	0.364	1.51962e-240	GC
AC002429.2	7.17642e-245	0.50895	0.297	0.044	1.96024e-240	GC
ZNF117	8.56502e-245	0.472127	0.321	0.052	2.33953e-240	GC
FSCN1	8.99634e-244	0.56633	0.392	0.086	2.45735e-239	GC
MAP7	3.88918e-243	0.407301	0.364	0.084	1.06233e-238	GC
ZMYND8	1.15219e-242	0.317225	0.51	0.186	3.14721e-238	GC
USP32	2.01584e-242	0.31626	0.702	0.338	5.50626e-238	GC
DPYSL3	3.74772e-242	0.54734	0.792	0.367	1.02369e-237	GC
SMYD3	1.58873e-241	0.747778	0.855	0.446	4.33962e-237	GC
ABHD6	1.79553e-241	0.444234	0.305	0.048	4.9045e-237	GC
SEC14L1	3.26539e-241	0.303529	0.534	0.196	8.91941e-237	GC
DHX32	3.48431e-241	0.355071	0.439	0.131	9.51739e-237	GC
KCTD1	2.77077e-240	0.820301	0.483	0.131	7.56837e-236	GC
SLX4IP	4.49297e-240	0.370518	0.432	0.131	1.22725e-235	GC
PSTPIP2	6.36799e-239	0.495453	0.293	0.045	1.73942e-234	GC
USP13	9.00601e-239	0.442751	0.519	0.18	2.45999e-234	GC
SLC26A2	2.13021e-238	0.559569	0.341	0.062	5.81867e-234	GC
FAM19A2	3.57651e-238	0.563602	0.75	0.345	9.76922e-234	GC
HDHD3	3.81918e-238	0.454297	0.272	0.036	1.04321e-233	GC
XYLT1	4.18581e-238	0.844764	0.626	0.225	1.14335e-233	GC
SPAG16	6.66867e-238	0.507195	0.493	0.154	1.82155e-233	GC
MTF2	6.70234e-238	0.268076	0.488	0.178	1.83074e-233	GC
NRIP1	6.96083e-238	1.14586	0.691	0.27	1.90135e-233	GC
AC239809.3	1.31878e-237	0.398511	0.316	0.06	3.60226e-233	GC
UBXN8	1.6237e-237	1.59746	0.565	0.174	4.43515e-233	GC
PARG	3.18878e-237	0.316913	0.596	0.253	8.71016e-233	GC
MTHFD1L	1.57434e-236	0.511008	0.707	0.313	4.3003e-232	GC
TPK1	5.07001e-236	0.464851	0.391	0.099	1.38487e-231	GC
ATP5F1C	1.59656e-235	0.251156	0.444	0.148	4.36101e-231	GC
RFX3-AS1	3.26933e-235	0.560636	0.421	0.107	8.93017e-231	GC
FAM198B	4.00766e-235	0.576605	0.706	0.304	1.09469e-230	GC
FAM204A	6.56312e-235	0.377644	0.42	0.121	1.79272e-230	GC
COBLL1	6.69853e-235	0.320256	0.493	0.174	1.8297e-230	GC
FLNB	1.09988e-234	0.662452	0.635	0.245	3.00431e-230	GC
CKAP5	2.40272e-234	0.252052	0.468	0.172	6.56303e-230	GC
CPEB4	3.41609e-234	1.17126	0.579	0.185	9.33106e-230	GC
DCAF10	4.55626e-234	0.263999	0.594	0.262	1.24454e-229	GC
CR381653.1	5.27966e-234	0.487897	0.329	0.059	1.44214e-229	GC
SMAD3	6.59599e-234	1.04049	0.737	0.316	1.8017e-229	GC
LINC00598	7.10542e-234	0.691706	0.492	0.148	1.94085e-229	GC
SCAI	7.69918e-234	0.993976	0.522	0.149	2.10303e-229	GC
ZNF596	1.04793e-233	0.428394	0.283	0.041	2.86242e-229	GC
ME2	1.58793e-233	0.638444	0.471	0.133	4.33743e-229	GC
FBXL17	1.72218e-233	0.370821	0.736	0.355	4.70413e-229	GC
PHF6	1.28574e-232	0.503722	0.448	0.126	3.512e-228	GC
VPS8	1.79256e-232	0.964169	0.704	0.288	4.89638e-228	GC
CACUL1	2.55383e-232	0.571891	0.599	0.23	6.97577e-228	GC
PARP4	2.85815e-232	0.270177	0.502	0.188	7.80705e-228	GC
SMARCAD1	6.60742e-232	0.348165	0.555	0.221	1.80482e-227	GC
YAF2	8.74594e-232	0.719983	0.614	0.23	2.38895e-227	GC
AL109930.1	1.75601e-231	1.48563	0.588	0.198	4.79655e-227	GC
CARMIL1	4.01527e-231	0.290716	0.715	0.359	1.09677e-226	GC
OSBPL1A	4.29392e-231	0.479848	0.772	0.381	1.17288e-226	GC
LDAH	8.36753e-231	0.267503	0.388	0.112	2.28559e-226	GC
GMDS-DT	8.63652e-231	0.332245	0.577	0.237	2.35906e-226	GC
PARP11	1.72734e-230	0.563054	0.501	0.16	4.71823e-226	GC
N4BP2	2.61938e-230	0.406827	0.466	0.149	7.15484e-226	GC
KLHL4	4.4644e-230	1.44166	0.484	0.129	1.21945e-225	GC
FGD4	6.23231e-230	0.349227	0.789	0.408	1.70236e-225	GC
KTN1-AS1	1.3752e-229	0.410297	0.267	0.039	3.75636e-225	GC
MGAT5	1.7241e-229	0.697063	0.726	0.319	4.70937e-225	GC
ZNF708	2.60051e-229	0.349592	0.467	0.158	7.10329e-225	GC
KDM3A	7.5526e-229	0.604758	0.524	0.17	2.06299e-224	GC
SYNDIG1	1.39219e-228	1.02312	0.25	0.022	3.80276e-224	GC
ESR2	1.47778e-228	0.760437	0.64	0.245	4.03654e-224	GC
CSPP1	3.11708e-228	0.824249	0.685	0.278	8.51431e-224	GC
LINC01004	4.2361e-228	0.300777	0.582	0.246	1.15709e-223	GC
MOB1B	4.37653e-228	0.386901	0.513	0.185	1.19545e-223	GC
MCPH1	1.77058e-227	0.377496	0.586	0.245	4.83633e-223	GC
CHCHD6	1.81994e-227	0.363604	0.362	0.091	4.97116e-223	GC
GALNT1	3.76629e-227	0.257002	0.472	0.172	1.02876e-222	GC
CASP6	6.54801e-227	0.42845	0.285	0.043	1.78859e-222	GC
CD2AP	2.34756e-226	0.311856	0.505	0.191	6.41237e-222	GC
AL356599.1	4.06666e-226	0.329925	0.357	0.095	1.11081e-221	GC
RAF1	6.48166e-226	0.327772	0.668	0.318	1.77047e-221	GC
IGF1R	1.00842e-225	0.824697	0.943	0.626	2.75451e-221	GC
DTNA	9.08339e-225	0.53217	0.296	0.051	2.48113e-220	GC
MAPK8	1.6407e-224	1.29977	0.78	0.384	4.48158e-220	GC
FBXL20	3.25676e-224	0.708141	0.724	0.318	8.89585e-220	GC
DMXL2	8.21752e-224	0.309885	0.366	0.096	2.24461e-219	GC
NAA35	8.28128e-224	0.268303	0.534	0.218	2.26203e-219	GC
TENT2	1.06736e-223	0.304381	0.776	0.412	2.9155e-219	GC
KIF1B	1.73984e-223	0.386767	0.704	0.338	4.75238e-219	GC
PRKACB	1.78992e-223	0.254057	0.467	0.173	4.88918e-219	GC
TRIM24	1.79617e-223	0.639655	0.648	0.265	4.90624e-219	GC
PTPN9	2.60246e-223	0.307618	0.492	0.187	7.10862e-219	GC
RCBTB1	2.71177e-223	0.348095	0.269	0.041	7.40721e-219	GC
REPS1	3.36972e-223	0.261876	0.501	0.196	9.20438e-219	GC
SRPX	9.86988e-223	0.804142	0.295	0.04	2.69596e-218	GC
USP9X	1.50268e-222	0.273165	0.688	0.346	4.10456e-218	GC
NBAS	2.9485e-222	0.348285	0.748	0.38	8.05382e-218	GC
CCDC57	1.54182e-221	0.388003	0.406	0.118	4.21148e-217	GC
CCDC65	1.97941e-221	0.444181	0.284	0.045	5.40676e-217	GC
AC096711.2	2.55437e-221	0.465699	0.42	0.119	6.97726e-217	GC
TPST1	2.87868e-221	0.800075	0.78	0.37	7.8631e-217	GC
SLC39A11	5.59749e-221	0.251803	0.454	0.163	1.52895e-216	GC
YEATS2	1.06068e-220	0.441928	0.535	0.2	2.89724e-216	GC
ELK1	1.27065e-220	0.66542	0.368	0.075	3.47078e-216	GC
SEMA3C	1.30052e-220	1.14381	0.502	0.144	3.55237e-216	GC
ZNF148	2.15157e-220	0.321272	0.784	0.422	5.87701e-216	GC
WNK3	7.48333e-220	0.909067	0.58	0.202	2.04407e-215	GC
ARHGEF9	1.21086e-219	0.440235	0.404	0.113	3.30746e-215	GC
TES	2.61801e-219	0.439088	0.294	0.051	7.1511e-215	GC
ZC3H7B	2.99634e-219	0.576125	0.469	0.14	8.1845e-215	GC
SOX4	4.50913e-219	0.947344	0.653	0.255	1.23167e-214	GC
PNKP	6.32271e-219	0.294625	0.265	0.045	1.72705e-214	GC
CCNJL	1.19397e-218	0.498663	0.274	0.039	3.26132e-214	GC
PDZD2	1.5171e-218	0.804544	0.757	0.351	4.14395e-214	GC
AC124319.2	5.59244e-218	0.381897	0.388	0.112	1.52758e-213	GC
CDK5RAP2	7.27814e-218	0.726988	0.629	0.242	1.98802e-213	GC
CHL1	1.45829e-217	1.09787	0.666	0.266	3.98331e-213	GC
GOLGA1	2.56528e-217	0.336768	0.334	0.083	7.00707e-213	GC
MFHAS1	3.19711e-217	0.809539	0.421	0.102	8.73291e-213	GC
PTTG1IP	4.77712e-217	0.365256	0.516	0.19	1.30487e-212	GC
SYNJ2	5.78027e-217	0.594324	0.375	0.086	1.57888e-212	GC
LINC00854	6.76076e-217	0.415745	0.421	0.128	1.8467e-212	GC
CNOT2	7.35117e-216	0.268324	0.7	0.366	2.00797e-211	GC
CTNNAL1	9.60068e-216	0.758587	0.737	0.335	2.62243e-211	GC
ACSM3	2.00729e-215	1.22901	0.964	0.702	5.48293e-211	GC
TCAF1	4.73685e-215	0.293343	0.542	0.224	1.29387e-210	GC
SFXN5	5.79144e-215	0.476587	0.345	0.076	1.58193e-210	GC
IGFBP2	6.80891e-215	0.252191	0.505	0.195	1.85985e-210	GC
AC099669.1	1.07123e-214	0.260896	0.315	0.08	2.92607e-210	GC
AC008537.1	1.21505e-214	0.308989	0.468	0.17	3.31892e-210	GC
TNRC18	2.45128e-214	0.329044	0.641	0.295	6.69568e-210	GC
ITFG1	2.86287e-214	0.334433	0.763	0.399	7.81992e-210	GC
CD99	6.49945e-214	0.762627	0.605	0.228	1.77532e-209	GC
SGCD	6.65653e-214	0.709744	0.603	0.233	1.81823e-209	GC
RICTOR	6.77528e-214	0.344502	0.662	0.315	1.85067e-209	GC
KIAA1211	8.88483e-214	0.699034	0.442	0.123	2.42689e-209	GC
GALNT18	1.46688e-213	0.284399	0.36	0.099	4.00677e-209	GC
ALG8	1.48066e-213	0.326894	0.304	0.066	4.04442e-209	GC
MLH3	2.10016e-213	0.2877	0.388	0.12	5.73658e-209	GC
SCAMP1	2.33989e-213	0.416405	0.454	0.147	6.39141e-209	GC
IDH1	5.41774e-213	0.353506	0.313	0.07	1.47986e-208	GC
FGF12	7.75195e-213	0.882592	0.307	0.047	2.11744e-208	GC
TM7SF2	7.8486e-213	0.364918	0.298	0.062	2.14384e-208	GC
NUBP1	8.93039e-213	0.410444	0.268	0.043	2.43934e-208	GC
AC004381.1	1.35774e-212	0.942123	0.317	0.05	3.70867e-208	GC
MDFIC	1.49392e-212	0.305152	0.405	0.127	4.08065e-208	GC
AP002336.2	1.77929e-212	0.257271	0.368	0.115	4.86014e-208	GC
WWC2	3.44759e-212	0.564134	0.774	0.385	9.4171e-208	GC
CTNNB1	7.7922e-212	0.570058	0.838	0.447	2.12844e-207	GC
HS3ST3A1	1.08452e-211	0.855194	0.369	0.082	2.96237e-207	GC
ABI2	1.76143e-211	0.273605	0.622	0.298	4.81134e-207	GC
OPHN1	6.04816e-211	0.797332	0.592	0.223	1.65206e-206	GC
ZC3HAV1	1.71152e-210	0.327313	0.516	0.202	4.67501e-206	GC
ADM	5.55081e-210	0.857706	0.326	0.057	1.5162e-205	GC
CEP57	9.06802e-210	0.357362	0.496	0.187	2.47693e-205	GC
GLS	1.21758e-209	0.253655	0.697	0.367	3.32583e-205	GC
GNAI1	1.44256e-209	0.654178	0.493	0.161	3.94034e-205	GC
ZNF714	2.45017e-209	0.523874	0.367	0.088	6.69264e-205	GC
HSDL2	3.70432e-209	0.587238	0.679	0.307	1.01184e-204	GC
ZNF608	4.62963e-209	0.334528	0.408	0.129	1.26458e-204	GC
EFL1	4.92381e-209	0.368643	0.286	0.055	1.34494e-204	GC
LHFPL2	6.81955e-209	0.635175	0.692	0.315	1.86276e-204	GC
LINC01376	2.09048e-208	0.429857	0.317	0.071	5.71014e-204	GC
RASSF8-AS1	2.73765e-208	0.280771	0.269	0.053	7.47789e-204	GC
YAP1	2.86192e-208	0.817438	0.886	0.507	7.81734e-204	GC
NEBL	3.58772e-208	1.18265	0.398	0.089	9.79987e-204	GC
ORMDL1	1.02872e-207	0.279064	0.396	0.128	2.80994e-203	GC
EXOC2	1.35212e-207	0.27344	0.474	0.182	3.69331e-203	GC
TMEM200A	1.36927e-207	0.500327	0.302	0.06	3.74017e-203	GC
C11orf80	1.38568e-207	0.311249	0.435	0.154	3.78497e-203	GC
SMYD2	5.09586e-207	0.343644	0.269	0.046	1.39193e-202	GC
ATP2C1	6.37221e-207	0.496654	0.691	0.327	1.74057e-202	GC
FAM117B	1.32455e-206	0.270894	0.449	0.164	3.61801e-202	GC
DHCR24	2.17495e-206	0.720384	0.46	0.135	5.94087e-202	GC
DOCK8	3.09033e-206	0.371166	0.28	0.057	8.44123e-202	GC
TBC1D19	3.39312e-206	0.339066	0.487	0.19	9.26832e-202	GC
CTNND1	1.14776e-205	0.262257	0.461	0.172	3.13511e-201	GC
SFPQ	1.29327e-205	0.28551	0.733	0.396	3.53257e-201	GC
NPAS2	1.66438e-205	0.346317	0.393	0.118	4.54626e-201	GC
RDX	2.10806e-205	1.23879	0.739	0.384	5.75816e-201	GC
ATG10	3.04096e-205	0.280594	0.378	0.121	8.30639e-201	GC
AP002075.1	3.57463e-205	0.269633	0.253	0.049	9.76409e-201	GC
GNPTAB	9.67235e-205	0.341823	0.375	0.108	2.642e-200	GC
EVI5	1.05232e-204	0.363516	0.631	0.291	2.87442e-200	GC
FOXL2	1.29939e-204	0.44552	0.454	0.15	3.54929e-200	GC
HIF1A-AS2	1.63929e-204	1.11272	0.502	0.152	4.47771e-200	GC
AC053527.1	2.23686e-204	0.364687	0.293	0.062	6.10999e-200	GC
LRRFIP2	1.14182e-203	0.47613	0.737	0.368	3.11888e-199	GC
CCDC14	2.24493e-203	0.260803	0.429	0.156	6.13202e-199	GC
MAP3K4	4.21577e-203	0.448409	0.566	0.233	1.15154e-198	GC
AP000311.1	4.61684e-203	0.516103	0.426	0.128	1.26109e-198	GC
PSMA3	6.19011e-203	0.312577	0.411	0.139	1.69083e-198	GC
PTBP3	6.43071e-203	0.823147	0.604	0.23	1.75655e-198	GC
FOXP2	8.8323e-203	0.737921	0.603	0.256	2.41254e-198	GC
KIDINS220	9.58936e-203	0.438203	0.753	0.389	2.61933e-198	GC
ZRANB3	9.73713e-203	0.353232	0.466	0.171	2.6597e-198	GC
SCAP	1.42909e-202	0.397819	0.38	0.107	3.90356e-198	GC
WDR27	1.45317e-202	0.255846	0.472	0.187	3.96933e-198	GC
DOK6	1.92046e-202	0.788073	0.486	0.158	5.24574e-198	GC
MGST2	2.38628e-202	0.346348	0.362	0.101	6.51812e-198	GC
NTN4	2.38688e-202	0.356694	0.398	0.12	6.51977e-198	GC
PDE8A	4.11257e-202	0.493443	0.739	0.366	1.12335e-197	GC
CMTM6	5.54083e-202	0.576637	0.401	0.105	1.51348e-197	GC
GPR137C	5.89934e-202	0.612506	0.302	0.055	1.6114e-197	GC
TOM1L1	2.07687e-201	0.31076	0.34	0.095	5.67298e-197	GC
FZD3	4.68572e-201	0.328966	0.412	0.137	1.2799e-196	GC
PGP	2.93404e-200	0.34409	0.286	0.058	8.01432e-196	GC
AP001347.1	3.77034e-200	0.333797	0.363	0.106	1.02987e-195	GC
ST5	3.97702e-200	0.59799	0.603	0.248	1.08632e-195	GC
KPNA3	3.9821e-200	0.443307	0.459	0.157	1.08771e-195	GC
TMEM45A	6.12932e-200	0.49552	0.324	0.071	1.67422e-195	GC
BMP2K	2.0387e-199	0.300079	0.447	0.165	5.56872e-195	GC
ZNF124	2.91696e-199	0.301456	0.376	0.117	7.96767e-195	GC
KIF9-AS1	3.4558e-199	0.394836	0.415	0.132	9.43952e-195	GC
GABPB1-AS1	4.05699e-199	0.285743	0.536	0.235	1.10817e-194	GC
RAB20	1.60054e-198	0.58065	0.311	0.061	4.37188e-194	GC
ICK	3.94845e-198	0.287459	0.311	0.077	1.07852e-193	GC
BCL9	4.23509e-198	0.312602	0.32	0.082	1.15681e-193	GC
VRK1	1.41088e-197	0.346789	0.296	0.065	3.85382e-193	GC
AC124312.1	3.65689e-197	0.331266	0.625	0.303	9.98881e-193	GC
OTUD3	4.04583e-197	0.339163	0.259	0.047	1.10512e-192	GC
ENC1	6.18773e-197	0.716803	0.376	0.091	1.69018e-192	GC
ZNF43	2.1848e-196	0.297911	0.405	0.139	5.96778e-192	GC
DST	3.45702e-196	0.82518	0.921	0.59	9.44285e-192	GC
VRK2	3.59418e-196	0.333519	0.448	0.163	9.81749e-192	GC
ARHGAP24	3.71667e-196	0.560545	0.518	0.189	1.01521e-191	GC
SRSF10	7.56793e-196	0.446519	0.61	0.267	2.06718e-191	GC
GXYLT1	2.32503e-195	0.348237	0.338	0.09	6.35082e-191	GC
MGST1	3.91258e-195	0.543768	0.399	0.117	1.06872e-190	GC
FAM169A	4.64575e-195	0.648211	0.289	0.049	1.26899e-190	GC
PACS1	4.88862e-195	0.547483	0.804	0.432	1.33533e-190	GC
CYP20A1	6.91362e-195	0.397686	0.589	0.265	1.88845e-190	GC
TMEM123	1.34744e-194	0.260128	0.495	0.206	3.68054e-190	GC
MTCP1	1.51583e-194	0.415047	0.255	0.042	4.14048e-190	GC
TMEM245	1.57973e-194	0.340942	0.766	0.416	4.31502e-190	GC
SERINC5	2.67994e-194	0.466977	0.62	0.279	7.32025e-190	GC
GRSF1	3.51351e-194	0.28551	0.34	0.097	9.59715e-190	GC
AC104596.1	1.17213e-193	0.431787	0.307	0.068	3.20167e-189	GC
DUBR	2.01556e-193	0.55369	0.503	0.185	5.50549e-189	GC
C1GALT1	2.2363e-193	0.31847	0.293	0.066	6.10846e-189	GC
SUCLG2-AS1	2.29368e-193	0.317942	0.353	0.105	6.26518e-189	GC
KIAA0319L	2.31429e-193	0.279255	0.506	0.213	6.32149e-189	GC
RHOXF1-AS1	3.25843e-193	0.469484	0.305	0.064	8.90041e-189	GC
RBM47	5.00563e-193	0.339672	0.337	0.092	1.36729e-188	GC
CGNL1	7.14535e-193	0.448128	0.366	0.102	1.95175e-188	GC
TAF1D	1.09745e-192	0.559213	0.648	0.289	2.99769e-188	GC
SDK1	3.54221e-192	0.930666	0.645	0.269	9.67556e-188	GC
UBA3	1.65227e-191	0.251185	0.382	0.131	4.51318e-187	GC
AC108062.1	3.20938e-191	0.403635	0.325	0.077	8.76643e-187	GC
PPFIA1	3.66504e-191	0.395863	0.598	0.273	1.00111e-186	GC
SMIM4	3.73116e-191	0.277425	0.322	0.088	1.01917e-186	GC
RANGAP1	5.90569e-191	0.843311	0.508	0.178	1.61314e-186	GC
NOD1	1.43774e-190	0.259013	0.451	0.179	3.92719e-186	GC
NXPE3	5.05296e-190	0.402478	0.287	0.057	1.38022e-185	GC
WDR44	9.58381e-190	0.474461	0.474	0.174	2.61782e-185	GC
ACER3	2.26255e-189	0.297778	0.449	0.173	6.18016e-185	GC
EPHX1	6.79263e-189	0.257897	0.477	0.193	1.85541e-184	GC
SETDB2	6.84688e-189	0.268661	0.357	0.114	1.87022e-184	GC
ASCC3	5.99935e-188	0.415025	0.666	0.325	1.63872e-183	GC
AC027018.1	6.17211e-188	0.320132	0.254	0.051	1.68591e-183	GC
PCMTD1	1.38798e-187	0.359762	0.782	0.441	3.79128e-183	GC
LCOR	9.27739e-187	0.420114	0.724	0.394	2.53412e-182	GC
GSTA1	1.14541e-186	0.367411	0.573	0.257	3.12869e-182	GC
STON1-GTF2A1L	1.79361e-186	1.10342	0.361	0.082	4.89925e-182	GC
AL138752.2	2.16286e-186	0.276393	0.332	0.099	5.90785e-182	GC
BMT2	3.46484e-186	0.377157	0.49	0.2	9.46422e-182	GC
ZMAT1	4.67446e-186	0.260228	0.293	0.078	1.27683e-181	GC
DDX58	7.94216e-186	0.5618	0.367	0.096	2.1694e-181	GC
NR5A1	9.64784e-186	0.518904	0.3	0.061	2.63531e-181	GC
VSTM4	1.13156e-185	0.375602	0.49	0.195	3.09087e-181	GC
AC011452.1	2.10489e-185	0.526688	0.326	0.074	5.74952e-181	GC
SAP30L-AS1	4.20954e-185	0.270327	0.324	0.097	1.14984e-180	GC
NMNAT3	1.03485e-184	0.272141	0.352	0.114	2.82668e-180	GC
AGL	1.51598e-184	0.291934	0.289	0.071	4.14089e-180	GC
INTS12	2.81085e-184	0.331401	0.282	0.064	7.67785e-180	GC
FUS	2.97787e-184	0.264045	0.689	0.367	8.13405e-180	GC
SLC35D1	3.74609e-184	0.309699	0.369	0.118	1.02325e-179	GC
HYDIN	4.76412e-184	0.314875	0.251	0.049	1.30132e-179	GC
RIC1	6.77455e-184	0.335459	0.607	0.29	1.85047e-179	GC
PLA2G12A	6.97205e-184	0.389698	0.261	0.047	1.90441e-179	GC
SLC20A2	1.30363e-183	0.251853	0.419	0.161	3.56086e-179	GC
ZNF720	1.85764e-183	0.300293	0.324	0.088	5.07416e-179	GC
AC018816.1	1.89267e-183	0.765404	0.359	0.087	5.16983e-179	GC
ZFP36L2	2.70078e-183	0.869143	0.691	0.32	7.37717e-179	GC
PAM	4.3261e-183	0.722794	0.821	0.451	1.18167e-178	GC
STRADB	6.26192e-183	0.279756	0.263	0.057	1.71044e-178	GC
NSD2	2.55747e-182	0.488806	0.484	0.18	6.98574e-178	GC
EML5	2.8533e-182	1.01604	0.689	0.319	7.79379e-178	GC
SH2D4A	3.1489e-182	0.41878	0.362	0.105	8.60123e-178	GC
LRBA	7.713e-182	0.330462	0.777	0.433	2.10681e-177	GC
PAK3	8.10015e-182	0.609191	0.321	0.07	2.21256e-177	GC
SLC9A7	1.67947e-181	0.266227	0.256	0.055	4.58747e-177	GC
HMGN3	7.94614e-181	0.302183	0.475	0.189	2.17049e-176	GC
ACO1	1.17145e-180	0.509248	0.431	0.142	3.19983e-176	GC
SIMC1	3.61086e-180	0.476314	0.822	0.463	9.86307e-176	GC
AC073082.1	1.01353e-179	0.496568	0.266	0.049	2.76845e-175	GC
AFG1L	4.47089e-179	0.256911	0.324	0.095	1.22122e-174	GC
SREBF2	5.99493e-179	0.532487	0.57	0.243	1.63752e-174	GC
CYP19A1	1.62103e-178	1.54836	0.446	0.135	4.42783e-174	GC
RNF19A	3.07176e-178	0.606299	0.63	0.284	8.39052e-174	GC
PLGRKT	3.15815e-178	0.380633	0.274	0.061	8.62648e-174	GC
C9orf147	4.46554e-178	0.5196	0.338	0.087	1.21976e-173	GC
ABCA9-AS1	7.99271e-178	0.483242	0.363	0.112	2.18321e-173	GC
DTNBP1	1.28301e-177	0.33108	0.354	0.112	3.50454e-173	GC
MSMO1	8.83259e-177	0.505747	0.37	0.111	2.41262e-172	GC
TNS3	4.65907e-176	0.512466	0.564	0.242	1.27262e-171	GC
PPP1R13B	9.34812e-176	0.907563	0.538	0.202	2.55344e-171	GC
EPB41L1	1.27667e-175	0.305152	0.282	0.068	3.48723e-171	GC
ABAT	1.29016e-175	0.46934	0.317	0.078	3.52408e-171	GC
BCL2L14	2.30048e-175	0.350288	0.349	0.109	6.28375e-171	GC
AFF4	5.41494e-175	0.660367	0.849	0.493	1.47909e-170	GC
AC023051.1	8.18815e-175	0.414741	0.252	0.05	2.23659e-170	GC
PCBD2	8.42705e-175	0.251867	0.269	0.066	2.30185e-170	GC
BABAM2	2.66195e-174	0.271463	0.754	0.432	7.27111e-170	GC
SRPK1	1.00761e-173	0.306729	0.416	0.156	2.75229e-169	GC
NDP	1.8417e-173	0.797381	0.269	0.044	5.0306e-169	GC
MTCL1	2.40031e-173	0.570713	0.281	0.055	6.55645e-169	GC
PLAGL1	2.49945e-173	0.310179	0.507	0.228	6.82725e-169	GC
PCNX1	2.88317e-173	0.275546	0.79	0.464	7.87539e-169	GC
SCD	3.44636e-173	0.487409	0.334	0.086	9.41372e-169	GC
SERPINE2	8.15345e-173	1.53087	0.556	0.251	2.22711e-168	GC
RHOBTB1	1.19039e-172	0.457052	0.333	0.088	3.25156e-168	GC
KLF12	1.46314e-172	0.37081	0.555	0.255	3.99658e-168	GC
HEG1	1.52844e-172	0.589553	0.373	0.108	4.17493e-168	GC
AK4	4.91914e-172	0.891928	0.292	0.053	1.34366e-167	GC
FAM196A	2.28846e-171	0.281426	0.278	0.075	6.25092e-167	GC
WIPF3	8.4426e-171	0.463585	0.713	0.375	2.3061e-166	GC
ZNF765	8.96427e-171	0.262839	0.358	0.122	2.44859e-166	GC
MED14	1.14643e-170	0.292822	0.424	0.164	3.13147e-166	GC
MAP3K1	9.53384e-170	0.258762	0.342	0.115	2.60417e-165	GC
PTGR1	5.8446e-168	0.255003	0.311	0.097	1.59645e-163	GC
RSRP1	1.24379e-167	0.307639	0.611	0.303	3.39742e-163	GC
CDH12	6.09578e-167	0.277973	0.29	0.087	1.66506e-162	GC
LINC01572	1.4183e-166	0.37421	0.263	0.059	3.87409e-162	GC
GUCY1A2	1.54565e-166	0.464512	0.375	0.117	4.22195e-162	GC
AL662796.1	6.07296e-166	0.27707	0.352	0.125	1.65883e-161	GC
SKIL	2.58098e-165	0.322091	0.494	0.221	7.04994e-161	GC
ZC3H12C	4.4813e-165	0.651037	0.466	0.162	1.22407e-160	GC
ANK2	6.4027e-165	0.529716	0.704	0.373	1.7489e-160	GC
FRYL	7.06892e-164	0.568182	0.754	0.404	1.93088e-159	GC
CDHR3	8.84488e-164	0.312487	0.276	0.073	2.41598e-159	GC
DHRSX	1.15018e-163	0.344776	0.565	0.273	3.14173e-159	GC
SPOPL	6.26906e-163	0.280517	0.421	0.167	1.71239e-158	GC
COL4A3	9.44464e-163	0.365492	0.257	0.058	2.5798e-158	GC
CMTM7	1.12618e-162	0.294484	0.252	0.057	3.07615e-158	GC
RAB31	1.15708e-162	0.571224	0.676	0.336	3.16057e-158	GC
SLC22A23	3.08452e-162	0.751137	0.367	0.1	8.42538e-158	GC
RBPJ	3.57726e-162	0.347059	0.637	0.339	9.77129e-158	GC
DPH6-DT	6.73847e-162	0.494839	0.557	0.256	1.84061e-157	GC
ATXN1	8.10223e-162	0.641183	0.85	0.514	2.21312e-157	GC
LIMS1	1.01021e-161	0.302073	0.672	0.37	2.75939e-157	GC
LY6E-DT	7.75439e-161	0.612269	0.252	0.043	2.11811e-156	GC
FRMD6	1.59282e-160	0.718892	0.371	0.106	4.35079e-156	GC
CSGALNACT2	2.40196e-160	0.349097	0.378	0.133	6.56094e-156	GC
KYAT1	3.84798e-160	0.372364	0.259	0.057	1.05107e-155	GC
DAG1	4.65171e-160	0.769685	0.316	0.07	1.27062e-155	GC
GPAT4	1.02216e-159	0.294282	0.282	0.074	2.79203e-155	GC
MRPS22	5.07443e-159	0.440124	0.321	0.091	1.38608e-154	GC
THUMPD1	2.15502e-158	1.51642	0.549	0.243	5.88645e-154	GC
PSME4	9.42472e-158	0.279103	0.64	0.348	2.57436e-153	GC
VAPA	2.18195e-157	0.320283	0.81	0.504	5.96001e-153	GC
PPP4R4	2.60783e-157	0.636344	0.408	0.136	7.12328e-153	GC
SEPT10	1.02514e-156	0.264136	0.41	0.166	2.80016e-152	GC
AL031428.1	1.60365e-156	0.271212	0.274	0.08	4.38037e-152	GC
PIK3R1	2.44627e-156	0.279196	0.661	0.356	6.68198e-152	GC
FAM3C	2.95324e-156	0.251013	0.336	0.114	8.06678e-152	GC
UQCRC2	3.39284e-156	0.263392	0.438	0.179	9.26754e-152	GC
TMEM65	4.34417e-156	0.870556	0.497	0.183	1.18661e-151	GC
OSBPL6	1.41557e-155	0.602545	0.279	0.06	3.86662e-151	GC
ABHD5	2.51907e-155	0.299862	0.25	0.059	6.88084e-151	GC
MBOAT7	5.86457e-155	0.72674	0.396	0.128	1.60191e-150	GC
ST3GAL5	6.96854e-155	0.32695	0.258	0.063	1.90346e-150	GC
GNG12-AS1	1.09671e-154	0.819774	0.412	0.132	2.99565e-150	GC
TCEA3	1.17817e-154	0.484778	0.372	0.119	3.21816e-150	GC
AKAP9	2.37855e-154	0.395962	0.863	0.551	6.49701e-150	GC
GAB2	5.73421e-154	0.403833	0.736	0.421	1.5663e-149	GC
JADE3	1.6688e-153	0.265074	0.278	0.076	4.55834e-149	GC
FBXW11	4.24212e-153	0.707172	0.67	0.33	1.15874e-148	GC
MYO9A	4.46792e-153	0.304588	0.786	0.486	1.22041e-148	GC
CNNM2	1.05297e-152	0.543843	0.514	0.224	2.87619e-148	GC
PLXNC1	2.39163e-151	0.257213	0.352	0.131	6.53275e-147	GC
TMED8	4.01198e-151	0.291074	0.274	0.073	1.09587e-146	GC
SNX30	5.36851e-151	0.298488	0.27	0.07	1.46641e-146	GC
[truncated: 3,167 more rows]

## Sheet: ST3
Supplementary Table 3. Cell type-associated differentially accessible chromatin regions (DARs)
avg_log2FC: the Log2 fold change of chromatin accessibility in the current cluster against the rest of clusters. pct.1: the percentage of cells in the current cluster which are in open chromatin state in the current region. pct.2: the percentage of cells in the rest of cluster which are in open chromatin state in the current region. cluster: cluster ID. p_val: P value; p_val_adj: Bonferroni-adjus…
peak	p_val	avg_log2FC	pct.1	pct.2	p_val_adj	cluster
chr13-43515628-43516881	2.67926e-114	0.233872	0.081	0.034	5.15031e-109	SC
chr5-4901095-4902320	7.31267e-104	0.218125	0.063	0.022	1.40571e-98	SC
chr1-60982864-60984962	4.74907e-102	0.217528	0.097	0.049	9.12909e-97	SC
chr12-14283727-14284971	4.69815e-101	0.206533	0.083	0.041	9.0312e-96	SC
chr15-93485285-93487021	1.67443e-100	0.199999	0.067	0.029	3.21874e-95	SC
chr14-101358812-101360996	2.44885e-100	0.183358	0.088	0.049	4.7074e-95	SC
chr1-197366593-197368048	1.45634e-96	0.204603	0.065	0.027	2.7995e-91	SC
chr1-184620957-184622875	3.30263e-95	0.194179	0.102	0.061	6.34862e-90	SC
chr6-90711235-90712487	2.04639e-94	0.213548	0.054	0.016	3.93375e-89	SC
chr9-80797531-80799013	9.94376e-92	0.203324	0.065	0.026	1.91148e-86	SC
chr2-238937806-238939744	2.3472e-90	0.182096	0.085	0.048	4.51201e-85	SC
chr11-69074533-69076377	5.99537e-90	0.183806	0.08	0.043	1.15248e-84	SC
chr7-159108419-159109876	8.55092e-88	0.188019	0.053	0.019	1.64374e-82	SC
chr1-13948181-13949597	3.27309e-87	0.197791	0.062	0.025	6.29183e-82	SC
chr11-10386728-10388992	1.46778e-85	0.18008	0.079	0.043	2.82149e-80	SC
chr16-78504581-78506613	4.88227e-84	0.171995	0.08	0.045	9.38514e-79	SC
chr2-101960695-101962584	6.11485e-83	0.181951	0.128	0.088	1.17545e-77	SC
chr9-16213590-16215345	9.0392e-83	0.184969	0.072	0.037	1.7376e-77	SC
chr20-19274210-19276349	1.22965e-82	0.179431	0.102	0.065	2.36375e-77	SC
chr8-37961457-37962784	1.45726e-82	0.180731	0.052	0.02	2.80128e-77	SC
chr18-44742218-44743315	4.34804e-82	0.186253	0.062	0.028	8.3582e-77	SC
chr9-121851451-121853859	6.50373e-82	0.173012	0.102	0.066	1.25021e-76	SC
chr3-95459438-95460948	2.42866e-81	0.191606	0.053	0.019	4.66859e-76	SC
chr5-158461068-158461960	3.25982e-81	0.184947	0.059	0.025	6.26632e-76	SC
chr10-76251538-76253127	3.58603e-81	0.1776	0.076	0.04	6.89338e-76	SC
chr2-229443936-229446554	4.47303e-81	0.190726	0.085	0.046	8.59847e-76	SC
chr3-188978345-188979588	8.5787e-81	0.171866	0.058	0.028	1.64907e-75	SC
chr11-2708248-2709829	2.06065e-80	0.169951	0.07	0.037	3.96117e-75	SC
chr18-37452799-37454322	4.56692e-80	0.172748	0.057	0.025	8.77894e-75	SC
chr14-34495933-34497982	4.74269e-80	0.179554	0.104	0.066	9.11682e-75	SC
chr17-4598705-4600359	2.72273e-79	0.175745	0.062	0.029	5.23388e-74	SC
chr3-43000154-43002014	8.23941e-79	0.180062	0.091	0.055	1.58385e-73	SC
chr3-113147312-113149029	9.86043e-79	0.182374	0.064	0.03	1.89546e-73	SC
chr1-5966218-5968047	1.89271e-78	0.171917	0.06	0.028	3.63833e-73	SC
chr2-120765361-120766708	5.57961e-76	0.165486	0.087	0.054	1.07256e-70	SC
chr1-208226008-208227782	7.30732e-76	0.170899	0.084	0.049	1.40468e-70	SC
chr6-133888663-133889446	1.22374e-75	0.181148	0.072	0.037	2.35239e-70	SC
chr11-101428941-101430864	3.31451e-75	0.177848	0.051	0.019	6.37145e-70	SC
chr1-6286707-6288441	4.23762e-75	0.156306	0.061	0.033	8.14594e-70	SC
chr1-232613488-232615288	1.41807e-74	0.171204	0.059	0.028	2.72593e-69	SC
chr17-10088391-10090580	2.35884e-74	0.158722	0.057	0.028	4.53438e-69	SC
chr1-115282572-115284123	8.50011e-74	0.182441	0.078	0.042	1.63397e-68	SC
chr7-132379288-132380716	4.63185e-73	0.16959	0.062	0.03	8.90375e-68	SC
chr6-81894253-81896002	4.02058e-72	0.171836	0.069	0.037	7.72873e-67	SC
chr2-197097292-197098300	4.32596e-72	0.174135	0.051	0.02	8.31575e-67	SC
chr15-100125102-100126659	1.26349e-71	0.16636	0.062	0.031	2.4288e-66	SC
chr2-166493658-166494916	1.8665e-71	0.174817	0.064	0.032	3.58796e-66	SC
chr10-22554264-22555358	1.992e-71	0.168182	0.068	0.036	3.8292e-66	SC
chr1-208047226-208048404	1.51602e-70	0.168716	0.064	0.032	2.91424e-65	SC
chr9-16308653-16310348	1.93987e-70	0.149819	0.073	0.045	3.72899e-65	SC
chr2-205800044-205801467	2.97018e-70	0.161133	0.067	0.037	5.70954e-65	SC
chr2-46665977-46667301	3.08681e-70	0.161471	0.053	0.024	5.93374e-65	SC
chr2-27154148-27155348	3.5611e-70	0.158546	0.057	0.029	6.84547e-65	SC
chr7-89400999-89402078	4.26694e-70	0.170171	0.06	0.029	8.2023e-65	SC
chr7-102933379-102934417	4.70536e-70	0.170383	0.057	0.026	9.04506e-65	SC
chr2-21646346-21647834	1.58886e-69	0.164562	0.053	0.024	3.05425e-64	SC
chr5-93224678-93226844	2.38323e-69	0.15541	0.054	0.026	4.58126e-64	SC
chr3-123412185-123413585	2.40173e-69	0.169177	0.08	0.047	4.61682e-64	SC
chr5-97477954-97479379	2.42683e-69	0.167879	0.055	0.025	4.66507e-64	SC
chr9-86794394-86796399	2.86005e-69	0.156736	0.072	0.042	5.49785e-64	SC
chr4-11072597-11074286	3.90481e-69	0.166259	0.06	0.03	7.50618e-64	SC
chr17-55566795-55568245	7.01909e-69	0.160841	0.06	0.03	1.34927e-63	SC
chr3-77930806-77932267	9.69779e-69	0.18205	0.052	0.021	1.8642e-63	SC
chr17-9841784-9842855	3.3231e-68	0.161059	0.057	0.029	6.38796e-63	SC
chr17-31570642-31571953	8.55635e-68	0.151011	0.071	0.042	1.64478e-62	SC
chr16-66247601-66248591	1.22415e-67	0.16625	0.051	0.022	2.35317e-62	SC
chr7-29479338-29481265	1.47224e-67	0.157487	0.084	0.051	2.83007e-62	SC
chr18-79588213-79589942	2.52085e-67	0.14609	0.08	0.053	4.8458e-62	SC
chr1-53061211-53063079	7.07145e-67	0.15334	0.068	0.041	1.35934e-61	SC
chr19-10225869-10227415	9.27685e-67	0.152752	0.061	0.034	1.78328e-61	SC
chr5-131671408-131673281	9.59857e-67	0.147117	0.081	0.052	1.84512e-61	SC
chr7-31026572-31028208	9.85771e-67	0.161089	0.054	0.026	1.89494e-61	SC
chr15-65258208-65259934	2.51592e-66	0.139653	0.067	0.041	4.83633e-61	SC
chr18-62017489-62019125	2.56179e-66	0.173586	0.062	0.03	4.9245e-61	SC
chr4-183540496-183541840	2.80804e-66	0.154955	0.075	0.046	5.39786e-61	SC
chr21-34279936-34281321	3.1329e-66	0.158011	0.051	0.023	6.02234e-61	SC
chr11-43546609-43548808	3.27766e-66	0.161446	0.064	0.034	6.30062e-61	SC
chr15-80343049-80344119	9.33708e-66	0.152228	0.051	0.024	1.79486e-60	SC
chr5-116625743-116627222	1.27505e-65	0.162826	0.088	0.057	2.45102e-60	SC
chr7-148153045-148154423	1.35486e-65	0.168056	0.066	0.035	2.60443e-60	SC
chr2-67259559-67261343	1.492e-65	0.165113	0.068	0.037	2.86806e-60	SC
chr5-179325226-179327171	2.3559e-65	0.164599	0.054	0.025	4.52873e-60	SC
chr4-113291370-113293639	4.0497e-65	0.175656	0.068	0.035	7.78469e-60	SC
chr10-28703499-28705171	6.64356e-65	0.141241	0.05	0.025	1.27709e-59	SC
chr1-226972978-226974835	6.80693e-65	0.14334	0.087	0.059	1.30849e-59	SC
chr15-81189246-81191659	7.66084e-65	0.155949	0.061	0.032	1.47264e-59	SC
chr19-17841147-17842861	1.05885e-64	0.138653	0.113	0.086	2.03541e-59	SC
chr13-35722390-35724370	1.33642e-64	0.158722	0.065	0.035	2.56898e-59	SC
chr2-23553452-23554827	2.00983e-64	0.160135	0.051	0.023	3.86347e-59	SC
chr4-151173708-151175471	2.25851e-64	0.14974	0.064	0.037	4.34151e-59	SC
chr5-79689219-79690579	2.55925e-64	0.150063	0.068	0.041	4.91961e-59	SC
chr22-27827116-27828518	3.82433e-64	0.1379	0.061	0.035	7.35148e-59	SC
chr1-22791740-22793093	6.91441e-64	0.14514	0.05	0.026	1.32915e-58	SC
chr7-159143841-159145780	8.07881e-64	0.151966	0.06	0.032	1.55298e-58	SC
chr10-71312785-71314825	1.25442e-63	0.140741	0.095	0.067	2.41136e-58	SC
chr2-231269931-231271266	1.91641e-63	0.148797	0.064	0.037	3.6839e-58	SC
chr11-62689111-62690282	2.62432e-63	0.146002	0.057	0.031	5.0447e-58	SC
chr1-67587863-67588900	4.01365e-63	0.146796	0.056	0.03	7.7154e-58	SC
chr13-49307219-49309345	4.16694e-63	0.143504	0.093	0.065	8.01007e-58	SC
chr2-238868208-238869966	5.12792e-63	0.156259	0.054	0.027	9.85735e-58	SC
chr11-112364317-112365721	9.65522e-63	0.162589	0.053	0.024	1.85601e-57	SC
chr5-122673005-122674144	1.21816e-62	0.171686	0.057	0.027	2.34165e-57	SC
chr15-49876315-49878904	1.41172e-62	0.155354	0.072	0.042	2.71374e-57	SC
chr14-22847724-22849816	2.16315e-62	0.135472	0.101	0.072	4.15819e-57	SC
chr12-113931956-113933814	2.49305e-62	0.142832	0.057	0.032	4.79236e-57	SC
chr14-95659728-95661311	2.50827e-62	0.147433	0.054	0.029	4.82162e-57	SC
chr8-56906909-56908014	2.92026e-62	0.161018	0.054	0.026	5.61359e-57	SC
chr4-88340994-88342353	3.39826e-62	0.169692	0.06	0.03	6.53244e-57	SC
chr8-8562399-8563632	2.09076e-61	0.156436	0.056	0.028	4.01904e-56	SC
chr2-237885706-237887416	6.33716e-61	0.148721	0.065	0.037	1.21819e-55	SC
chr17-13775870-13777917	3.18445e-60	0.134565	0.056	0.032	6.12144e-55	SC
chr7-75055298-75057044	3.69536e-60	0.127975	0.088	0.064	7.10355e-55	SC
chr2-200466230-200467741	4.15126e-60	0.157802	0.057	0.028	7.97992e-55	SC
chr2-160920463-160922015	1.08674e-59	0.13452	0.077	0.052	2.08903e-54	SC
chr1-28295945-28297601	1.09576e-59	0.140663	0.072	0.047	2.10637e-54	SC
chr3-141114826-141117025	1.62264e-59	0.160784	0.064	0.034	3.11918e-54	SC
chr6-165987716-165989109	1.74109e-59	0.153266	0.061	0.033	3.34688e-54	SC
chr7-150971298-150972545	2.45847e-59	0.150135	0.059	0.032	4.72589e-54	SC
chr2-23617042-23618389	2.81929e-59	0.142291	0.061	0.035	5.4195e-54	SC
chr13-51785573-51787254	3.02491e-59	0.140547	0.061	0.035	5.81476e-54	SC
chr5-32504711-32506473	3.41393e-59	0.138371	0.059	0.034	6.56256e-54	SC
chr2-41963265-41964382	4.42188e-59	0.134256	0.083	0.058	8.50013e-54	SC
chr8-38043394-38044586	5.20433e-59	0.154806	0.058	0.03	1.00042e-53	SC
chr14-94612116-94613527	5.22647e-59	0.144939	0.051	0.026	1.00468e-53	SC
chr6-151698668-151700353	5.25022e-59	0.140611	0.053	0.028	1.00924e-53	SC
chr2-238998476-238999787	6.14376e-59	0.147345	0.051	0.025	1.18101e-53	SC
chr5-59350788-59352527	1.15651e-58	0.155945	0.053	0.026	2.22315e-53	SC
chr6-16257782-16258983	1.21349e-58	0.148478	0.06	0.033	2.33268e-53	SC
chr2-96952370-96954322	1.3488e-58	0.132012	0.07	0.047	2.59278e-53	SC
chr1-70486495-70488094	1.53594e-58	0.157434	0.05	0.023	2.95252e-53	SC
chr1-168320357-168321667	1.90763e-58	0.147773	0.067	0.04	3.66702e-53	SC
chr6-43074842-43076872	2.33727e-58	0.124194	0.082	0.059	4.4929e-53	SC
chr2-120757482-120759023	2.37232e-58	0.13926	0.068	0.043	4.56029e-53	SC
chr1-203480150-203481055	3.0409e-58	0.132339	0.074	0.05	5.8455e-53	SC
chr11-120184379-120185949	3.48979e-58	0.126939	0.086	0.063	6.70838e-53	SC
chr3-16236716-16237766	4.06695e-58	0.146293	0.064	0.037	7.81786e-53	SC
chr14-100708491-100709931	6.81631e-58	0.137554	0.069	0.044	1.31029e-52	SC
chr5-177094200-177095459	8.29137e-58	0.143453	0.056	0.03	1.59384e-52	SC
chr10-78551687-78553207	1.17423e-57	0.139966	0.057	0.033	2.2572e-52	SC
chr17-10126461-10128495	1.67768e-57	0.137818	0.062	0.037	3.22498e-52	SC
chr20-37327385-37328674	1.8314e-57	0.143213	0.052	0.027	3.52048e-52	SC
chr2-222993612-222994944	1.85522e-57	0.150384	0.064	0.035	3.56627e-52	SC
chr14-101364205-101365506	3.21521e-57	0.137796	0.075	0.049	6.18057e-52	SC
chr10-10797561-10798946	5.05969e-57	0.135045	0.055	0.031	9.72619e-52	SC
chr5-115978982-115980239	6.49797e-57	0.14483	0.057	0.032	1.2491e-51	SC
chr9-16352234-16353458	6.81804e-57	0.135172	0.054	0.03	1.31062e-51	SC
chr4-8506060-8507250	9.72253e-57	0.137903	0.065	0.04	1.86895e-51	SC
chr9-92035030-92036657	2.59599e-56	0.137038	0.053	0.029	4.99025e-51	SC
chr3-43152484-43154121	3.04372e-56	0.14359	0.071	0.043	5.85091e-51	SC
chr2-128378042-128379920	5.10175e-56	0.133754	0.092	0.067	9.80704e-51	SC
chr11-26946983-26948074	1.04838e-55	0.150266	0.059	0.032	2.01529e-50	SC
chr21-46048939-46050455	1.24355e-55	0.125554	0.066	0.043	2.39046e-50	SC
chr9-27539390-27540907	1.31388e-55	0.131971	0.074	0.05	2.52566e-50	SC
chr11-69012968-69014715	1.41808e-55	0.12893	0.096	0.071	2.72597e-50	SC
chr1-178952723-178954175	2.27342e-55	0.143203	0.05	0.025	4.37017e-50	SC
chr3-45409260-45410907	2.53895e-55	0.128628	0.06	0.036	4.88061e-50	SC
chr14-23364717-23367100	3.29466e-55	0.125627	0.084	0.061	6.33329e-50	SC
chr1-171257123-171259475	3.57306e-55	0.147369	0.062	0.036	6.86846e-50	SC
chr2-219768709-219769982	3.96018e-55	0.152039	0.059	0.032	7.61262e-50	SC
chr20-19211451-19213638	4.49811e-55	0.144992	0.075	0.049	8.64667e-50	SC
chr12-3251711-3253148	5.61239e-55	0.14299	0.059	0.033	1.07886e-49	SC
chr4-76801449-76802877	6.07904e-55	0.144431	0.05	0.026	1.16857e-49	SC
chr4-151168906-151169610	6.73905e-55	0.144004	0.058	0.033	1.29544e-49	SC
chr11-79439766-79441249	9.18888e-55	0.131575	0.078	0.055	1.76637e-49	SC
chr2-237326232-237326931	1.63284e-54	0.148954	0.051	0.025	3.13879e-49	SC
chr9-27368314-27369368	1.71902e-54	0.133581	0.056	0.033	3.30446e-49	SC
chr1-92755271-92757060	2.2723e-54	0.146937	0.052	0.027	4.36803e-49	SC
chr4-153497871-153499333	2.36904e-54	0.14499	0.07	0.042	4.55397e-49	SC
chr8-98367355-98368435	2.84544e-54	0.135896	0.055	0.031	5.46975e-49	SC
chr3-158768191-158769975	3.31666e-54	0.126711	0.087	0.064	6.37559e-49	SC
chr17-8478851-8480592	5.27885e-54	0.121814	0.058	0.037	1.01475e-48	SC
chr11-78808814-78811161	5.41326e-54	0.132071	0.054	0.031	1.04059e-48	SC
chr1-63674088-63675974	7.0995e-54	0.136009	0.084	0.059	1.36473e-48	SC
chr4-8274661-8275296	7.72143e-54	0.136396	0.05	0.028	1.48428e-48	SC
chr3-77038301-77040582	7.77437e-54	0.137176	0.102	0.077	1.49446e-48	SC
chr17-17778271-17779013	1.43174e-53	0.124264	0.062	0.039	2.75222e-48	SC
chr3-170811180-170812622	1.46323e-53	0.133774	0.057	0.034	2.81276e-48	SC
chr5-169003349-169004794	1.49135e-53	0.145805	0.05	0.026	2.86682e-48	SC
chr9-86965508-86967226	1.66754e-53	0.116506	0.055	0.035	3.20549e-48	SC
chr4-8472344-8474513	1.85279e-53	0.109364	0.118	0.1	3.5616e-48	SC
chr17-62626533-62628551	1.92652e-53	0.120832	0.086	0.064	3.70332e-48	SC
chr18-76363322-76364800	2.05636e-53	0.126015	0.072	0.049	3.95293e-48	SC
chr5-159450593-159451936	3.05127e-53	0.14335	0.052	0.028	5.86543e-48	SC
chr9-92650188-92651606	3.38779e-53	0.140369	0.055	0.031	6.51232e-48	SC
chr20-4835000-4836378	4.14406e-53	0.128854	0.053	0.031	7.96608e-48	SC
chr3-139893429-139895161	4.72054e-53	0.145048	0.051	0.027	9.07424e-48	SC
chr1-229821815-229823166	6.46406e-53	0.1348	0.05	0.027	1.24258e-47	SC
chr5-159877565-159878731	6.70345e-53	0.145091	0.055	0.03	1.2886e-47	SC
chr11-46599367-46601549	7.99336e-53	0.137158	0.06	0.035	1.53656e-47	SC
chr18-36179357-36180515	2.99362e-52	0.134231	0.076	0.05	5.75461e-47	SC
chr10-29617617-29619612	3.56932e-52	0.105949	0.086	0.067	6.86127e-47	SC
chr4-128652955-128654462	8.85753e-52	0.14991	0.054	0.028	1.70267e-46	SC
chr2-11697071-11698936	1.56072e-51	0.133055	0.084	0.058	3.00016e-46	SC
chr5-179264974-179266109	1.98584e-51	0.131566	0.068	0.045	3.81736e-46	SC
chr9-125424537-125425958	2.16402e-51	0.112814	0.05	0.031	4.15987e-46	SC
chr17-65530579-65532355	2.36143e-51	0.104957	0.071	0.052	4.53936e-46	SC
chr2-229415788-229416805	3.15132e-51	0.148412	0.059	0.033	6.05775e-46	SC
chr6-168439949-168442518	3.68275e-51	0.119039	0.078	0.057	7.07932e-46	SC
chr9-103188246-103189715	6.6078e-51	0.138898	0.05	0.026	1.27021e-45	SC
chr3-151500986-151502490	8.01262e-51	0.136158	0.056	0.033	1.54026e-45	SC
chr9-110766900-110768371	8.08119e-51	0.127225	0.053	0.031	1.55344e-45	SC
chr10-103676784-103678767	1.19204e-50	0.123713	0.089	0.067	2.29144e-45	SC
chr4-54625165-54626641	1.19686e-50	0.130192	0.057	0.034	2.30072e-45	SC
chr2-47191253-47193412	1.61317e-50	0.123447	0.058	0.037	3.10099e-45	SC
chr12-93108610-93110155	2.35388e-50	0.118071	0.051	0.031	4.52484e-45	SC
chr19-15779516-15781112	4.53495e-50	0.117553	0.064	0.043	8.71749e-45	SC
chr20-3686471-3687485	4.84155e-50	0.119371	0.054	0.033	9.30686e-45	SC
chr3-31274252-31275961	5.15233e-50	0.133473	0.068	0.044	9.90427e-45	SC
chr22-23590802-23592411	8.05671e-50	0.113222	0.058	0.039	1.54873e-44	SC
chr5-14409798-14411191	1.48122e-49	0.129745	0.053	0.03	2.84733e-44	SC
chr4-8340194-8341969	1.48355e-49	0.113186	0.088	0.069	2.85181e-44	SC
chr3-140385893-140387486	1.54384e-49	0.120998	0.062	0.041	2.9677e-44	SC
chr3-134463600-134465074	1.66929e-49	0.114414	0.056	0.037	3.20886e-44	SC
chr1-178931679-178932826	2.27975e-49	0.131901	0.07	0.045	4.38233e-44	SC
chr8-92647272-92648776	3.32972e-49	0.134534	0.05	0.028	6.40068e-44	SC
chr5-136057474-136058957	4.04421e-49	0.125006	0.063	0.04	7.77415e-44	SC
chr12-91239438-91240611	4.15808e-49	0.12724	0.051	0.029	7.99304e-44	SC
chr2-120911638-120913082	4.20259e-49	0.115744	0.073	0.053	8.0786e-44	SC
chr12-12908798-12910767	4.37131e-49	0.121254	0.063	0.041	8.40293e-44	SC
chr3-27319181-27320806	5.05812e-49	0.131224	0.062	0.041	9.72317e-44	SC
chr15-70867029-70868496	5.16209e-49	0.122776	0.055	0.034	9.92304e-44	SC
chr8-101689586-101691207	8.17618e-49	0.107741	0.076	0.057	1.5717e-43	SC
chr9-2559078-2560787	9.42334e-49	0.123112	0.058	0.036	1.81144e-43	SC
chr17-50209385-50210664	1.07357e-48	0.115056	0.082	0.061	2.06371e-43	SC
chr16-65248921-65250270	1.62414e-48	0.128288	0.053	0.031	3.12206e-43	SC
chr5-67647809-67649158	1.66852e-48	0.120806	0.05	0.03	3.20737e-43	SC
chr8-39989916-39991553	1.79063e-48	0.129188	0.053	0.031	3.44212e-43	SC
chr11-34274235-34275749	1.94891e-48	0.132112	0.06	0.037	3.74637e-43	SC
chr9-16342967-16344609	2.47166e-48	0.131925	0.052	0.029	4.75124e-43	SC
chr4-26047942-26049404	3.15514e-48	0.125501	0.05	0.029	6.06509e-43	SC
chr5-88942108-88943529	3.21655e-48	0.124162	0.061	0.04	6.18315e-43	SC
chr9-76255668-76256771	3.59277e-48	0.125195	0.058	0.037	6.90635e-43	SC
chr12-123041696-123042992	6.84023e-48	0.108675	0.062	0.043	1.31489e-42	SC
chr7-134703168-134704370	8.95353e-48	0.11756	0.055	0.033	1.72113e-42	SC
chr1-208029318-208031394	1.19193e-47	0.124241	0.058	0.036	2.29124e-42	SC
chr4-99300423-99302079	1.21101e-47	0.132681	0.062	0.039	2.32792e-42	SC
chr6-37144220-37145210	1.27094e-47	0.116445	0.059	0.039	2.44311e-42	SC
chr8-99872182-99874401	1.2726e-47	0.111439	0.057	0.037	2.4463e-42	SC
chr15-40091857-40093530	1.38636e-47	0.102391	0.083	0.065	2.66498e-42	SC
chr15-85749345-85751207	1.77044e-47	0.109825	0.073	0.054	3.4033e-42	SC
chr16-3998851-4000410	1.85059e-47	0.109672	0.061	0.042	3.55738e-42	SC
chr3-126179056-126181357	2.38336e-47	0.119438	0.09	0.068	4.58151e-42	SC
chr10-43962369-43963783	2.68649e-47	0.116092	0.065	0.047	5.16421e-42	SC
chr20-62042310-62043830	2.82008e-47	0.112912	0.054	0.035	5.421e-42	SC
chr11-68439132-68440676	3.87609e-47	0.120984	0.05	0.03	7.45097e-42	SC
chr4-123743494-123745271	4.37795e-47	0.12733	0.052	0.03	8.41569e-42	SC
chr5-44388042-44390244	6.0192e-47	0.133419	0.068	0.045	1.15707e-41	SC
chr3-113260938-113262375	6.64386e-47	0.129159	0.05	0.028	1.27714e-41	SC
chr7-150334892-150335897	7.20394e-47	0.116651	0.056	0.036	1.38481e-41	SC
chr18-31486045-31488028	7.46419e-47	0.130578	0.06	0.039	1.43483e-41	SC
chr6-169189201-169190605	8.52442e-47	0.1199	0.054	0.033	1.63864e-41	SC
chr9-97554746-97555670	1.23733e-46	0.129122	0.05	0.028	2.37851e-41	SC
chr12-101935633-101936921	1.29768e-46	0.130152	0.052	0.03	2.49452e-41	SC
chr20-17542164-17544381	1.60846e-46	0.107215	0.065	0.046	3.09192e-41	SC
chr12-94289198-94290638	1.69348e-46	0.110798	0.055	0.036	3.25536e-41	SC
chr2-27148466-27149420	1.99625e-46	0.115836	0.05	0.03	3.83738e-41	SC
chr14-53010638-53011616	2.86919e-46	0.122034	0.056	0.036	5.51541e-41	SC
chr5-150143354-150144816	3.10954e-46	0.113736	0.081	0.061	5.97743e-41	SC
chr3-14472481-14474139	3.34124e-46	0.11735	0.07	0.05	6.42283e-41	SC
chr11-121741043-121742831	3.45429e-46	0.11206	0.068	0.047	6.64015e-41	SC
chr10-73906102-73907472	3.72449e-46	0.121581	0.065	0.043	7.15954e-41	SC
chr6-160420757-160422480	4.61774e-46	0.122184	0.053	0.033	8.87663e-41	SC
chr20-50654849-50655918	4.67869e-46	0.0973623	0.061	0.045	8.9938e-41	SC
chr11-123165880-123166831	4.96916e-46	0.108926	0.052	0.033	9.55217e-41	SC
chr3-96812571-96815489	5.54367e-46	0.127147	0.117	0.096	1.06565e-40	SC
chr2-238846830-238849018	5.66699e-46	0.113122	0.067	0.048	1.08936e-40	SC
chr11-75553806-75554956	6.89811e-46	0.111202	0.117	0.094	1.32602e-40	SC
chr1-13583549-13584877	9.46598e-46	0.115002	0.053	0.034	1.81964e-40	SC
chr2-152463918-152465454	1.06188e-45	0.114525	0.079	0.059	2.04125e-40	SC
chr4-173521816-173523042	1.75312e-45	0.126676	0.087	0.064	3.37001e-40	SC
chr1-156475037-156476124	1.8403e-45	0.131568	0.058	0.034	3.53759e-40	SC
chr7-28069599-28070868	1.89749e-45	0.106364	0.057	0.039	3.64752e-40	SC
chr12-72271355-72273641	1.90866e-45	0.132795	0.078	0.054	3.66899e-40	SC
chr2-120866940-120868311	2.53619e-45	0.110103	0.072	0.053	4.8753e-40	SC
chr17-40541540-40543451	2.91358e-45	0.0963776	0.11	0.092	5.60076e-40	SC
chr20-38298297-38299270	2.9157e-45	0.116102	0.061	0.041	5.60481e-40	SC
chr2-8002744-8004729	3.51709e-45	0.10139	0.076	0.058	6.76086e-40	SC
chr8-30776907-30778681	3.65573e-45	0.09242	0.083	0.068	7.02737e-40	SC
chr2-8636018-8637527	3.96395e-45	0.11191	0.05	0.032	7.61986e-40	SC
chr10-24957677-24959456	4.33502e-45	0.115514	0.05	0.031	8.33316e-40	SC
chr1-182206536-182207805	4.46601e-45	0.13325	0.06	0.037	8.58496e-40	SC
chr3-185655728-185656867	4.66157e-45	0.119127	0.09	0.069	8.96089e-40	SC
chr6-81843994-81845689	4.77409e-45	0.12541	0.051	0.03	9.17719e-40	SC
chr1-9375834-9377600	5.21927e-45	0.0951494	0.095	0.078	1.00329e-39	SC
chr3-64547930-64549103	5.2355e-45	0.106646	0.052	0.034	1.00641e-39	SC
chr5-17377905-17379341	5.24782e-45	0.11258	0.056	0.037	1.00878e-39	SC
chr8-37821212-37822721	7.51476e-45	0.109975	0.064	0.044	1.44455e-39	SC
chr18-76056100-76057191	7.64938e-45	0.106148	0.061	0.043	1.47043e-39	SC
chr12-101051297-101052984	7.798e-45	0.111952	0.063	0.045	1.499e-39	SC
chr12-40691959-40693834	1.00144e-44	0.119058	0.072	0.053	1.92505e-39	SC
chr2-46001351-46002837	1.00796e-44	0.110994	0.053	0.034	1.93758e-39	SC
chr2-239327645-239330363	1.01776e-44	0.0956882	0.108	0.091	1.95643e-39	SC
chr14-101474802-101476335	1.29285e-44	0.097248	0.074	0.057	2.48523e-39	SC
chr16-70725106-70726648	1.45991e-44	0.105466	0.059	0.041	2.80636e-39	SC
chr8-93403623-93405441	1.94357e-44	0.129058	0.062	0.04	3.73611e-39	SC
chr11-19930868-19932405	2.04675e-44	0.10842	0.062	0.044	3.93445e-39	SC
chr9-27474873-27476221	2.4244e-44	0.109732	0.059	0.041	4.66039e-39	SC
chr5-172556843-172557964	2.56572e-44	0.113677	0.06	0.041	4.93205e-39	SC
chr5-10788015-10789861	2.82497e-44	0.122278	0.059	0.038	5.43041e-39	SC
chr12-32038904-32040831	3.20436e-44	0.102924	0.056	0.039	6.1597e-39	SC
chr21-32456082-32457550	3.37728e-44	0.110437	0.053	0.034	6.49211e-39	SC
chr12-93019612-93021335	3.85012e-44	0.101129	0.061	0.044	7.40105e-39	SC
chr6-28488704-28490849	5.12034e-44	0.120787	0.055	0.034	9.84277e-39	SC
chr7-159067360-159069398	5.1783e-44	0.12126	0.05	0.03	9.9542e-39	SC
chr9-129351625-129353362	8.56729e-44	0.109853	0.053	0.035	1.64688e-38	SC
chr11-118605177-118605942	9.25237e-44	0.103013	0.059	0.041	1.77857e-38	SC
chr22-40709486-40710391	1.05986e-43	0.107936	0.05	0.032	2.03736e-38	SC
chr10-124032673-124034243	1.11369e-43	0.106262	0.05	0.033	2.14083e-38	SC
chr1-197463690-197464517	1.83949e-43	0.121013	0.06	0.039	3.53603e-38	SC
chr2-237256527-237258006	2.02864e-43	0.10583	0.061	0.043	3.89963e-38	SC
chr7-74370720-74373183	2.42896e-43	0.0905012	0.062	0.047	4.66916e-38	SC
chr3-194312218-194313210	3.08666e-43	0.106612	0.062	0.044	5.93345e-38	SC
chr8-30215387-30216155	3.38746e-43	0.109674	0.056	0.039	6.51168e-38	SC
chr1-115337344-115338435	3.50587e-43	0.124757	0.052	0.03	6.73929e-38	SC
chr18-74233660-74235336	3.77692e-43	0.108484	0.078	0.059	7.26034e-38	SC
chr2-219608948-219610372	4.37073e-43	0.110454	0.068	0.05	8.40182e-38	SC
chr12-64681425-64682923	4.44328e-43	0.110718	0.065	0.045	8.54128e-38	SC
chr1-180926112-180927666	5.98375e-43	0.112519	0.05	0.032	1.15025e-37	SC
chr11-64619469-64621149	6.80018e-43	0.1109	0.062	0.043	1.30719e-37	SC
chr1-23393250-23395105	7.41872e-43	0.0918548	0.084	0.068	1.42609e-37	SC
chr12-109716128-109716888	7.47761e-43	0.105384	0.056	0.039	1.43741e-37	SC
chr3-139934529-139936716	1.02902e-42	0.113405	0.082	0.063	1.97807e-37	SC
chr14-100664828-100665785	1.06175e-42	0.100669	0.052	0.035	2.04099e-37	SC
chr9-2424122-2425094	1.08734e-42	0.111664	0.051	0.033	2.09018e-37	SC
chr5-172402702-172404100	1.37816e-42	0.101617	0.071	0.053	2.64922e-37	SC
chr1-220767256-220768707	1.4238e-42	0.105901	0.071	0.053	2.73695e-37	SC
chr9-76161177-76162551	1.57762e-42	0.124136	0.05	0.029	3.03264e-37	SC
chr1-193340652-193342414	1.57773e-42	0.127628	0.055	0.034	3.03285e-37	SC
chr2-67649040-67651272	1.89056e-42	0.110793	0.055	0.037	3.63421e-37	SC
chr15-85642067-85643105	2.00978e-42	0.105346	0.052	0.034	3.86338e-37	SC
chr6-75204123-75205528	2.03218e-42	0.11524	0.071	0.05	3.90643e-37	SC
chr14-59377102-59378645	2.41342e-42	0.100613	0.052	0.036	4.63929e-37	SC
chr9-129314951-129316076	2.49336e-42	0.102589	0.063	0.045	4.79296e-37	SC
chr7-107971449-107973460	3.29999e-42	0.112348	0.069	0.049	6.34354e-37	SC
chr6-169223897-169225337	3.66811e-42	0.110093	0.059	0.04	7.05117e-37	SC
chr21-38920472-38921503	3.84393e-42	0.0976418	0.056	0.039	7.38915e-37	SC
chr18-44708030-44709986	4.70543e-42	0.114371	0.064	0.044	9.0452e-37	SC
chr5-62828697-62830490	4.85897e-42	0.114077	0.053	0.035	9.34036e-37	SC
chr13-44223715-44225193	5.64213e-42	0.113706	0.054	0.034	1.08458e-36	SC
chr7-767667-769264	5.75255e-42	0.105869	0.074	0.056	1.10581e-36	SC
chr21-46027799-46029066	6.47966e-42	0.0987315	0.056	0.039	1.24558e-36	SC
chr8-19170425-19171439	6.49958e-42	0.117885	0.052	0.033	1.24941e-36	SC
chr10-91022265-91024743	1.15918e-41	0.108552	0.056	0.038	2.22828e-36	SC
chr13-99311663-99312896	1.24077e-41	0.104314	0.073	0.055	2.38511e-36	SC
chr7-140640630-140641658	1.48304e-41	0.113691	0.053	0.033	2.85082e-36	SC
chr5-66442153-66444153	1.61593e-41	0.116644	0.053	0.034	3.10628e-36	SC
chr2-241898824-241900089	2.03533e-41	0.102025	0.059	0.042	3.9125e-36	SC
chr18-34837545-34838393	2.1364e-41	0.125114	0.053	0.033	4.10678e-36	SC
chr9-36624642-36626120	2.20646e-41	0.109666	0.059	0.041	4.24146e-36	SC
chr14-23639738-23641103	2.23293e-41	0.11193	0.057	0.038	4.29233e-36	SC
chr6-127463823-127465195	2.2863e-41	0.129419	0.057	0.035	4.39492e-36	SC
chr17-73283508-73284256	2.50117e-41	0.108427	0.058	0.039	4.80797e-36	SC
chr18-76265021-76266524	3.87372e-41	0.0943599	0.071	0.055	7.44641e-36	SC
chr2-23523034-23524921	4.67644e-41	0.100144	0.061	0.044	8.98947e-36	SC
chr2-30411416-30413021	4.91239e-41	0.103881	0.065	0.048	9.44304e-36	SC
chr2-27077992-27079197	6.39563e-41	0.102201	0.066	0.048	1.22943e-35	SC
chr9-127051801-127053665	7.15323e-41	0.0943853	0.051	0.035	1.37506e-35	SC
chr11-34327311-34328502	7.15464e-41	0.103613	0.05	0.033	1.37533e-35	SC
chr6-160454822-160456502	1.05928e-40	0.102539	0.067	0.049	2.03625e-35	SC
chr3-123700630-123701508	1.45e-40	0.11362	0.062	0.042	2.78733e-35	SC
chr5-31962218-31964019	1.49081e-40	0.0998715	0.069	0.052	2.86578e-35	SC
chr11-121722016-121723989	1.55232e-40	0.0997101	0.087	0.069	2.98401e-35	SC
chr8-13514148-13516113	1.71113e-40	0.115568	0.06	0.04	3.28928e-35	SC
chr11-125262154-125264042	1.94593e-40	0.101748	0.079	0.063	3.74064e-35	SC
chr5-180351855-180354251	1.96358e-40	0.109888	0.1	0.083	3.77457e-35	SC
chr20-40868171-40869826	2.51597e-40	0.105995	0.055	0.037	4.83643e-35	SC
chr1-80891805-80893585	2.93874e-40	0.101733	0.053	0.037	5.64911e-35	SC
chr15-49901871-49903232	3.49618e-40	0.107741	0.063	0.044	6.72068e-35	SC
chr2-12492920-12494300	3.58445e-40	0.119182	0.061	0.04	6.89035e-35	SC
chr5-68953024-68954759	3.66138e-40	0.105768	0.057	0.04	7.03823e-35	SC
chr6-13760289-13761896	4.85397e-40	0.103868	0.056	0.039	9.33073e-35	SC
chr9-70049197-70050296	5.20076e-40	0.109952	0.061	0.042	9.99737e-35	SC
chr16-75732865-75734722	5.72509e-40	0.0954079	0.051	0.036	1.10053e-34	SC
chr10-58951488-58953397	6.28663e-40	0.0996142	0.066	0.05	1.20847e-34	SC
chr3-16426750-16427911	7.69768e-40	0.109894	0.057	0.038	1.47972e-34	SC
chr9-95771493-95773228	9.01136e-40	0.0993589	0.05	0.034	1.73224e-34	SC
chr13-44331321-44333216	9.10154e-40	0.0983447	0.06	0.043	1.74958e-34	SC
chr9-96078719-96080112	1.06263e-39	0.103994	0.055	0.037	2.04269e-34	SC
chr12-14892475-14893693	1.35492e-39	0.109601	0.052	0.033	2.60455e-34	SC
chr10-71475614-71477310	1.35673e-39	0.0883111	0.06	0.045	2.60802e-34	SC
chr16-72247023-72248986	1.42644e-39	0.106724	0.07	0.052	2.74204e-34	SC
chr8-26624850-26626056	1.4474e-39	0.107203	0.055	0.038	2.78232e-34	SC
chr7-17651265-17652760	1.82609e-39	0.117099	0.054	0.034	3.51028e-34	SC
chr11-2824846-2826903	2.04984e-39	0.0851401	0.093	0.08	3.94039e-34	SC
chr3-130608820-130610232	2.46643e-39	0.111566	0.05	0.031	4.74118e-34	SC
chr3-13091882-13093805	3.12311e-39	0.108562	0.076	0.058	6.00353e-34	SC
chr6-45555691-45557404	3.30474e-39	0.0937365	0.062	0.047	6.35267e-34	SC
chr18-2856328-2858298	3.77397e-39	0.0991487	0.078	0.061	7.25466e-34	SC
chr1-153506278-153507674	4.19012e-39	0.0840919	0.065	0.052	8.05464e-34	SC
chr1-70718418-70719800	5.6442e-39	0.100569	0.056	0.04	1.08498e-33	SC
chr20-17225904-17227461	5.72499e-39	0.114422	0.053	0.036	1.10051e-33	SC
chr17-4229597-4230552	6.05872e-39	0.0889594	0.061	0.046	1.16466e-33	SC
chr4-7206217-7207668	7.12454e-39	0.102894	0.06	0.043	1.36954e-33	SC
chr7-664960-666357	7.76427e-39	0.0926999	0.055	0.04	1.49252e-33	SC
chr6-160766391-160767886	7.9597e-39	0.112062	0.052	0.034	1.53009e-33	SC
chr12-106113464-106115056	8.18091e-39	0.108387	0.059	0.04	1.57261e-33	SC
chr17-41415340-41416742	9.617e-39	0.097722	0.055	0.04	1.84867e-33	SC
chr8-97950668-97952802	9.73351e-39	0.0875877	0.092	0.078	1.87106e-33	SC
chr10-88926324-88927677	1.20913e-38	0.0920542	0.05	0.036	2.32431e-33	SC
chr17-83189100-83190499	1.55803e-38	0.0847582	0.05	0.036	2.99499e-33	SC
chr2-54401625-54402834	1.58058e-38	0.10736	0.051	0.033	3.03834e-33	SC
chr10-58511601-58514018	2.02119e-38	0.0868484	0.095	0.083	3.88531e-33	SC
chr18-56167440-56168828	2.29049e-38	0.0997181	0.055	0.038	4.40298e-33	SC
chr11-126139108-126140586	2.94251e-38	0.0894852	0.05	0.035	5.65636e-33	SC
chr11-121104386-121105983	2.99155e-38	0.0964391	0.063	0.047	5.75062e-33	SC
chr5-67693573-67694630	3.62203e-38	0.116838	0.053	0.033	6.96259e-33	SC
chr1-178938277-178939975	4.79498e-38	0.110403	0.066	0.047	9.21733e-33	SC
chr12-67430423-67431827	5.0031e-38	0.107176	0.059	0.041	9.6174e-33	SC
chr19-19119811-19121087	5.16852e-38	0.109474	0.059	0.041	9.9354e-33	SC
chr4-65669390-65671002	5.48871e-38	0.123445	0.056	0.036	1.05509e-32	SC
chr10-116690554-116691991	5.7683e-38	0.096271	0.053	0.037	1.10884e-32	SC
chr13-44263894-44264980	5.94059e-38	0.0980918	0.054	0.037	1.14195e-32	SC
chr1-51642353-51643521	7.44084e-38	0.0977775	0.061	0.046	1.43034e-32	SC
chr2-120736407-120738058	7.53798e-38	0.0930276	0.068	0.054	1.44902e-32	SC
chr2-43017718-43019067	7.6041e-38	0.0919811	0.07	0.055	1.46173e-32	SC
chr17-82669349-82670557	8.44751e-38	0.0827383	0.067	0.053	1.62386e-32	SC
chr12-131829780-131831065	8.56463e-38	0.104691	0.058	0.04	1.64637e-32	SC
chr2-229265595-229267018	9.9382e-38	0.107997	0.054	0.037	1.91041e-32	SC
chr5-61731363-61732719	1.09364e-37	0.0983754	0.053	0.037	2.10229e-32	SC
chr17-1729856-1731254	1.29153e-37	0.0884611	0.072	0.058	2.4827e-32	SC
chr4-88017393-88018781	1.5661e-37	0.107726	0.063	0.044	3.0105e-32	SC
chr7-94374756-94375957	1.80631e-37	0.100448	0.058	0.041	3.47225e-32	SC
chr3-58164980-58165798	2.3784e-37	0.0940718	0.05	0.035	4.57197e-32	SC
chr2-46716573-46718132	3.17986e-37	0.0984654	0.055	0.039	6.11262e-32	SC
chr8-54244074-54245238	3.82006e-37	0.0999582	0.073	0.056	7.34325e-32	SC
chr12-12901078-12902297	4.05848e-37	0.101896	0.055	0.038	7.80157e-32	SC
chr17-15409337-15410339	4.5803e-37	0.0973969	0.058	0.042	8.80466e-32	SC
chr7-47391695-47393096	4.81707e-37	0.087877	0.068	0.054	9.2598e-32	SC
chr11-123193712-123195955	5.02442e-37	0.0969151	0.062	0.046	9.65839e-32	SC
chr10-131425660-131427038	6.15234e-37	0.0972558	0.054	0.039	1.18266e-31	SC
chr11-78267976-78269571	6.20807e-37	0.0865712	0.055	0.041	1.19337e-31	SC
chr2-66575779-66577738	6.23846e-37	0.0859867	0.079	0.066	1.19921e-31	SC
chr11-130477492-130479405	7.11274e-37	0.0845824	0.085	0.072	1.36727e-31	SC
chr8-99859317-99860854	7.55952e-37	0.075484	0.087	0.077	1.45316e-31	SC
chr5-156475245-156476315	7.9747e-37	0.0956366	0.058	0.044	1.53297e-31	SC
chr11-13962195-13964193	8.33618e-37	0.0898375	0.053	0.04	1.60246e-31	SC
chr6-89034529-89036210	8.40762e-37	0.0930188	0.119	0.105	1.61619e-31	SC
chr3-48214800-48216353	1.02517e-36	0.0972104	0.053	0.037	1.97068e-31	SC
chr6-75205702-75206414	1.15281e-36	0.109765	0.065	0.045	2.21604e-31	SC
chr11-3641302-3643055	1.26689e-36	0.10818	0.064	0.047	2.43533e-31	SC
chr1-203368751-203369768	1.33201e-36	0.107437	0.05	0.033	2.56052e-31	SC
chr17-11607709-11609111	1.42037e-36	0.0910699	0.055	0.041	2.73037e-31	SC
chr7-54836592-54838002	1.47209e-36	0.110807	0.059	0.041	2.82978e-31	SC
chr3-120907479-120909378	1.98188e-36	0.1037	0.073	0.056	3.80975e-31	SC
chr2-219289308-219290079	1.99495e-36	0.0883018	0.069	0.054	3.83488e-31	SC
chr9-70284852-70286625	2.12463e-36	0.0869474	0.059	0.045	4.08415e-31	SC
chr12-57148607-57149773	2.64364e-36	0.0862617	0.07	0.057	5.08185e-31	SC
chr1-183733791-183735236	2.72379e-36	0.0992893	0.05	0.035	5.23592e-31	SC
chr1-53182855-53184045	3.03516e-36	0.0883362	0.055	0.04	5.83447e-31	SC
chr16-66501827-66503534	3.59324e-36	0.0833468	0.055	0.041	6.90725e-31	SC
chr4-98516733-98518020	4.39681e-36	0.0859431	0.067	0.054	8.45194e-31	SC
chr2-216739936-216741496	5.75927e-36	0.0794201	0.071	0.059	1.1071e-30	SC
chr1-20008017-20009313	5.82523e-36	0.106537	0.055	0.037	1.11978e-30	SC
chr14-100679560-100680830	6.18574e-36	0.0979889	0.069	0.053	1.18908e-30	SC
chr12-21940390-21942632	6.95489e-36	0.0894167	0.069	0.054	1.33693e-30	SC
chr13-79749792-79751057	7.12151e-36	0.100816	0.055	0.039	1.36896e-30	SC
chr7-106042114-106043147	7.73618e-36	0.0988446	0.055	0.038	1.48712e-30	SC
chr8-57702308-57703558	8.13816e-36	0.0994102	0.062	0.047	1.56439e-30	SC
chr12-47736282-47737966	9.03616e-36	0.0793132	0.107	0.096	1.73701e-30	SC
chr4-82718042-82718997	9.19732e-36	0.0878579	0.073	0.059	1.76799e-30	SC
chr11-2306021-2307535	1.1487e-35	0.0809684	0.066	0.054	2.20813e-30	SC
chr3-149553506-149554542	1.25281e-35	0.101488	0.051	0.034	2.40826e-30	SC
chr2-105495599-105497109	1.49131e-35	0.0941011	0.051	0.035	2.86672e-30	SC
chr4-158120272-158121685	1.5553e-35	0.0989224	0.059	0.043	2.98973e-30	SC
chr10-80207029-80208048	1.632e-35	0.0951972	0.057	0.041	3.13717e-30	SC
chr1-228149283-228151399	1.79306e-35	0.0953449	0.091	0.074	3.44677e-30	SC
chr11-65297928-65299036	2.23131e-35	0.0814798	0.054	0.04	4.28923e-30	SC
chr11-57597160-57599462	2.32454e-35	0.0866971	0.087	0.072	4.46843e-30	SC
chr20-53443880-53445576	2.83261e-35	0.0935658	0.055	0.041	5.44509e-30	SC
chr2-238928768-238931083	2.98864e-35	0.0766394	0.059	0.047	5.74503e-30	SC
chr1-235047369-235048861	3.53532e-35	0.0844538	0.089	0.075	6.79592e-30	SC
chr19-40645197-40646997	3.56054e-35	0.0676823	0.086	0.075	6.84439e-30	SC
chr2-42906244-42907460	3.90283e-35	0.0994403	0.051	0.034	7.50238e-30	SC
chr17-5500330-5501701	4.34752e-35	0.0925703	0.053	0.038	8.35719e-30	SC
chr14-100677440-100678545	4.71987e-35	0.0885813	0.056	0.041	9.07296e-30	SC
chr13-92223901-92225218	4.95582e-35	0.0986317	0.065	0.051	9.52652e-30	SC
chr17-38693112-38694467	4.95991e-35	0.066205	0.073	0.063	9.53438e-30	SC
chr11-95679994-95681502	5.85685e-35	0.0968021	0.05	0.034	1.12586e-29	SC
chr6-81833863-81835185	6.0117e-35	0.10999	0.05	0.033	1.15562e-29	SC
chr8-48649022-48650177	6.70735e-35	0.0874902	0.075	0.061	1.28935e-29	SC
chr1-228801939-228803155	7.12695e-35	0.0927368	0.065	0.05	1.37001e-29	SC
chr14-67940175-67941812	7.61641e-35	0.0886758	0.059	0.044	1.46409e-29	SC
chr3-148955234-148956674	7.6874e-35	0.104781	0.076	0.057	1.47774e-29	SC
chr10-124063531-124064549	7.69319e-35	0.0825095	0.065	0.052	1.47885e-29	SC
chr5-179343801-179346326	7.70633e-35	0.0917939	0.054	0.04	1.48138e-29	SC
chr5-95669227-95670204	7.72378e-35	0.0994477	0.061	0.046	1.48473e-29	SC
chr9-111036972-111039603	7.7267e-35	0.0830404	0.064	0.052	1.4853e-29	SC
chr17-3802266-3803362	7.76249e-35	0.0801885	0.058	0.045	1.49217e-29	SC
chr1-201495511-201496361	8.18757e-35	0.0933584	0.063	0.048	1.57389e-29	SC
chr21-26800729-26801871	1.28634e-34	0.0962996	0.057	0.041	2.47271e-29	SC
chr21-31907835-31909841	1.3184e-34	0.0709655	0.052	0.041	2.53435e-29	SC
chr7-102913930-102915077	1.38377e-34	0.100107	0.061	0.045	2.66e-29	SC
chr8-23338764-23339651	1.44913e-34	0.0895518	0.058	0.044	2.78566e-29	SC
chr11-12397308-12398557	1.64189e-34	0.0893194	0.05	0.036	3.1562e-29	SC
chr1-227748018-227749518	2.07586e-34	0.0801082	0.077	0.065	3.9904e-29	SC
chr2-3584788-3586581	2.39386e-34	0.0918012	0.056	0.041	4.60169e-29	SC
chr17-10114192-10115730	2.46148e-34	0.0747618	0.082	0.07	4.73168e-29	SC
chr10-132463678-132465077	2.60751e-34	0.0875281	0.059	0.045	5.01239e-29	SC
chr9-130823520-130825416	3.37256e-34	0.0765357	0.058	0.047	6.48303e-29	SC
chr8-38450197-38451492	3.39602e-34	0.0933089	0.05	0.034	6.52813e-29	SC
chr10-102121099-102122272	3.65565e-34	0.079087	0.094	0.082	7.02721e-29	SC
chr18-7037851-7039028	3.67358e-34	0.0950395	0.072	0.058	7.06168e-29	SC
chr3-3798366-3800431	3.76424e-34	0.0935667	0.067	0.053	7.23596e-29	SC
chr8-11593248-11594582	4.78852e-34	0.084389	0.053	0.04	9.20493e-29	SC
chr12-6225693-6226996	4.83009e-34	0.0826352	0.064	0.05	9.28483e-29	SC
chr4-98565634-98566970	5.29994e-34	0.0930518	0.051	0.037	1.0188e-28	SC
chr8-130448243-130449792	5.91196e-34	0.0944232	0.054	0.038	1.13645e-28	SC
chr6-167572864-167574136	6.52242e-34	0.0799025	0.051	0.039	1.2538e-28	SC
chr8-120123282-120125353	7.42897e-34	0.0863093	0.093	0.081	1.42806e-28	SC
chr1-91650466-91652036	8.29729e-34	0.0982511	0.069	0.052	1.59498e-28	SC
chr2-11524197-11525100	9.10985e-34	0.084224	0.05	0.037	1.75118e-28	SC
chr8-48397894-48399099	1.04345e-33	0.0919758	0.051	0.037	2.00582e-28	SC
chr15-93087723-93089608	1.12752e-33	0.0822097	0.064	0.051	2.16742e-28	SC
chr7-44105009-44105820	1.19123e-33	0.0895081	0.057	0.042	2.28989e-28	SC
chr5-40990349-40992273	1.33699e-33	0.0898839	0.075	0.06	2.57008e-28	SC
chr10-114373772-114375018	1.41165e-33	0.0837095	0.054	0.041	2.71361e-28	SC
chr4-52995748-52997595	1.52745e-33	0.0853133	0.082	0.07	2.93621e-28	SC
chr3-86990374-86991660	1.63408e-33	0.104087	0.075	0.058	3.14117e-28	SC
chr1-161206489-161207890	1.64379e-33	0.0923025	0.07	0.054	3.15985e-28	SC
chr7-151425532-151427141	1.65415e-33	0.0861375	0.069	0.056	3.17976e-28	SC
chr10-27819459-27821007	1.74899e-33	0.096487	0.06	0.044	3.36207e-28	SC
chr9-83304107-83305625	1.81636e-33	0.0888048	0.071	0.057	3.49157e-28	SC
chr15-80480052-80481368	1.86258e-33	0.0890404	0.055	0.041	3.58042e-28	SC
chr6-27668399-27670680	1.94035e-33	0.0996757	0.05	0.035	3.72991e-28	SC
chr7-37915805-37917381	2.98733e-33	0.0950747	0.081	0.065	5.74252e-28	SC
chr7-138244757-138246355	3.07529e-33	0.0859148	0.05	0.037	5.9116e-28	SC
chr1-25743086-25744925	3.31576e-33	0.0696678	0.085	0.075	6.37386e-28	SC
chr3-184568430-184569591	3.56693e-33	0.0868217	0.062	0.048	6.85668e-28	SC
chr5-139104063-139105883	3.80554e-33	0.0876591	0.074	0.06	7.31536e-28	SC
chr9-2353917-2356009	6.01801e-33	0.076657	0.053	0.041	1.15684e-27	SC
chr15-60916678-60918220	6.53212e-33	0.0751669	0.07	0.059	1.25566e-27	SC
chr19-2866449-2867624	6.69854e-33	0.0857075	0.063	0.05	1.28765e-27	SC
chr8-48619670-48620957	7.08986e-33	0.087369	0.069	0.055	1.36288e-27	SC
chr6-14476488-14478748	9.28146e-33	0.0879421	0.058	0.044	1.78417e-27	SC
chr20-37314648-37316136	9.3718e-33	0.0628091	0.072	0.065	1.80153e-27	SC
chr10-76086134-76087613	9.45883e-33	0.0801716	0.053	0.041	1.81826e-27	SC
chr1-25727086-25728362	1.1288e-32	0.0890275	0.051	0.037	2.16988e-27	SC
chr9-134230470-134231655	1.18684e-32	0.0785778	0.051	0.039	2.28144e-27	SC
chr16-84832240-84832996	1.23135e-32	0.083555	0.059	0.045	2.36702e-27	SC
chr6-90610063-90611672	1.35725e-32	0.103784	0.063	0.046	2.60902e-27	SC
chr1-54277225-54278230	1.40394e-32	0.0754727	0.071	0.06	2.69878e-27	SC
chr11-111416689-111418271	1.40463e-32	0.0810468	0.074	0.062	2.70011e-27	SC
chr4-54227397-54228373	1.9507e-32	0.0910442	0.067	0.053	3.7498e-27	SC
chr19-49726992-49728614	2.01642e-32	0.0678948	0.054	0.044	3.87614e-27	SC
chr19-17829886-17831819	2.18432e-32	0.0837845	0.079	0.067	4.19889e-27	SC
chr7-71131128-71133081	2.23429e-32	0.0799855	0.06	0.048	4.29495e-27	SC
chr5-150155399-150156468	2.47948e-32	0.0821448	0.077	0.065	4.76628e-27	SC
chr9-545312-547510	2.54583e-32	0.0796302	0.052	0.04	4.89382e-27	SC
chr13-113121624-113123656	2.80012e-32	0.092082	0.052	0.036	5.38264e-27	SC
chr7-2103712-2105193	3.09775e-32	0.071821	0.063	0.053	5.95477e-27	SC
chr18-76528451-76529835	3.23495e-32	0.0783835	0.072	0.06	6.21851e-27	SC
chr2-127086893-127087973	3.31134e-32	0.0878104	0.063	0.049	6.36536e-27	SC
chr7-75842196-75843891	3.47183e-32	0.0696514	0.069	0.058	6.67386e-27	SC
chr1-113981984-113983151	3.57124e-32	0.0904007	0.059	0.047	6.86496e-27	SC
chr7-129187710-129190347	4.18796e-32	0.0659893	0.068	0.059	8.05047e-27	SC
chr14-88188720-88190247	4.94902e-32	0.0925664	0.054	0.039	9.51345e-27	SC
chr4-147755305-147756393	5.00048e-32	0.0845982	0.057	0.044	9.61237e-27	SC
chr3-46005862-46007120	6.41205e-32	0.0835868	0.06	0.047	1.23258e-26	SC
chr1-16017563-16018555	6.61728e-32	0.082515	0.062	0.048	1.27203e-26	SC
chr20-17806177-17807480	6.91394e-32	0.0699796	0.058	0.047	1.32906e-26	SC
chr6-169253341-169254146	8.3965e-32	0.0910233	0.05	0.036	1.61405e-26	SC
chr2-174023918-174026214	9.64915e-32	0.0791318	0.071	0.059	1.85485e-26	SC
chr6-42440831-42441993	1.09721e-31	0.0801202	0.05	0.038	2.10916e-26	SC
chr12-80936274-80938217	1.13013e-31	0.0880566	0.064	0.051	2.17244e-26	SC
chr3-120855067-120856940	1.18873e-31	0.0908179	0.065	0.051	2.28508e-26	SC
chr2-42060203-42061470	1.2775e-31	0.0823693	0.051	0.038	2.45573e-26	SC
chr13-43785129-43787615	1.39777e-31	0.0748593	0.088	0.079	2.68692e-26	SC
chr2-24303685-24305481	1.50455e-31	0.080485	0.058	0.046	2.89218e-26	SC
chr15-93072145-93073908	1.53344e-31	0.0816372	0.07	0.058	2.94772e-26	SC
chr12-22275328-22276503	1.53969e-31	0.104873	0.06	0.044	2.95974e-26	SC
chr9-114180516-114181956	1.70579e-31	0.0754897	0.051	0.039	3.27902e-26	SC
chr1-32353552-32354510	1.96079e-31	0.0638052	0.063	0.055	3.7692e-26	SC
chr1-67618107-67619705	1.96917e-31	0.0856384	0.067	0.052	3.78532e-26	SC
chr5-6785963-6787727	1.98231e-31	0.0809743	0.061	0.049	3.81057e-26	SC
chr6-47083141-47084414	2.42755e-31	0.0802739	0.066	0.053	4.66645e-26	SC
chr4-119025412-119027460	3.10264e-31	0.0776965	0.09	0.079	5.96417e-26	SC
chr21-45470611-45471966	3.15991e-31	0.0682862	0.052	0.042	6.07426e-26	SC
chr5-6812284-6813969	3.71839e-31	0.081948	0.051	0.038	7.14782e-26	SC
chr5-6581692-6583746	3.82143e-31	0.0872242	0.053	0.039	7.3459e-26	SC
chr15-92664681-92665761	3.89265e-31	0.080894	0.058	0.045	7.4828e-26	SC
chr15-62757715-62759019	4.10002e-31	0.0809724	0.051	0.039	7.88143e-26	SC
chr2-233386910-233388500	4.1934e-31	0.0841728	0.085	0.072	8.06093e-26	SC
chr1-228963579-228965011	4.63608e-31	0.0642705	0.078	0.07	8.91189e-26	SC
chr2-232632631-232634020	5.18039e-31	0.0827931	0.079	0.066	9.9582e-26	SC
chr10-28806523-28808285	6.02187e-31	0.0715236	0.064	0.054	1.15758e-25	SC
chr7-23332621-23335942	6.72914e-31	0.0675927	0.085	0.077	1.29354e-25	SC
chr6-41503652-41505917	6.79348e-31	0.0602187	0.076	0.068	1.3059e-25	SC
chr22-45552512-45554254	7.04163e-31	0.0585518	0.075	0.067	1.3536e-25	SC
chr17-50199797-50201358	7.45072e-31	0.0473438	0.136	0.133	1.43224e-25	SC
chr15-65384712-65386790	7.64613e-31	0.0641458	0.075	0.066	1.46981e-25	SC
chr10-71395765-71397954	9.37414e-31	0.0745333	0.071	0.06	1.80198e-25	SC
chr4-7842334-7843332	9.53944e-31	0.0845807	0.051	0.037	1.83376e-25	SC
chr4-173990135-173991563	1.06089e-30	0.0951544	0.05	0.035	2.03933e-25	SC
chr11-43904828-43906226	1.10291e-30	0.079415	0.055	0.042	2.12012e-25	SC
chr1-55718312-55719559	1.30101e-30	0.0749516	0.063	0.052	2.50091e-25	SC
chr11-130896809-130898646	1.31424e-30	0.0797344	0.086	0.074	2.52634e-25	SC
chr7-2811040-2812366	1.33143e-30	0.0815783	0.051	0.038	2.55939e-25	SC
chr17-49952218-49953906	1.33553e-30	0.0793358	0.05	0.036	2.56727e-25	SC
chr2-74874215-74875829	1.40689e-30	0.0768803	0.079	0.068	2.70444e-25	SC
chr1-170663596-170665331	1.87368e-30	0.0855325	0.061	0.048	3.60176e-25	SC
chr2-70029332-70030584	1.96369e-30	0.0837031	0.062	0.049	3.77478e-25	SC
chr9-116471024-116472351	2.06681e-30	0.0852788	0.051	0.038	3.97301e-25	SC
chr14-31261847-31264023	2.12802e-30	0.0807921	0.051	0.038	4.09067e-25	SC
chr5-139862994-139864337	2.20692e-30	0.0845625	0.053	0.04	4.24235e-25	SC
chr6-110357016-110359053	3.43249e-30	0.084865	0.055	0.042	6.59825e-25	SC
chr2-119425807-119427299	3.74446e-30	0.0817021	0.066	0.054	7.19794e-25	SC
chr2-217247489-217250481	3.83952e-30	0.0640011	0.076	0.068	7.38067e-25	SC
chr2-205947337-205948735	3.84405e-30	0.0795198	0.061	0.049	7.38939e-25	SC
chr4-80182470-80184992	3.97449e-30	0.0868595	0.085	0.069	7.64012e-25	SC
chr18-36580128-36581621	5.75085e-30	0.0894561	0.055	0.04	1.10548e-24	SC
chr6-157240008-157241047	5.99761e-30	0.0832866	0.05	0.037	1.15291e-24	SC
chr15-67914654-67916194	6.19153e-30	0.053133	0.056	0.048	1.19019e-24	SC
chr21-45306452-45307520	6.42589e-30	0.0686666	0.062	0.052	1.23524e-24	SC
chr3-195209220-195211137	6.44631e-30	0.0714233	0.069	0.059	1.23917e-24	SC
chr21-26795597-26796400	6.50739e-30	0.0839236	0.069	0.055	1.25091e-24	SC
chr10-78930806-78932378	8.01567e-30	0.0783962	0.053	0.041	1.54084e-24	SC
chr8-97433508-97434883	8.29713e-30	0.0903174	0.059	0.044	1.59495e-24	SC
chr13-32408099-32410422	1.21643e-29	0.0708022	0.054	0.044	2.33832e-24	SC
chr12-24837873-24839403	1.29902e-29	0.0810748	0.056	0.043	2.49709e-24	SC
chr16-90046336-90047639	1.32168e-29	0.0745744	0.053	0.042	2.54065e-24	SC
chr21-28110645-28112700	1.39045e-29	0.0656813	0.067	0.058	2.67285e-24	SC
chr7-134742343-134743663	1.50574e-29	0.0672747	0.067	0.058	2.89447e-24	SC
chr3-99637233-99638961	1.51862e-29	0.0793459	0.061	0.049	2.91923e-24	SC
chr11-61922485-61924162	1.55391e-29	0.0802107	0.066	0.053	2.98706e-24	SC
chr6-85864492-85867839	1.58365e-29	0.079797	0.086	0.075	3.04423e-24	SC
chr11-1459776-1461496	1.68677e-29	0.0778549	0.067	0.055	3.24246e-24	SC
chr5-149422096-149423313	1.96442e-29	0.0787791	0.076	0.065	3.77619e-24	SC
chr3-12507630-12508995	2.00914e-29	0.0752801	0.058	0.047	3.86215e-24	SC
chr2-24855188-24856333	2.13472e-29	0.0767297	0.055	0.044	4.10355e-24	SC
chr6-128882245-128883587	2.13551e-29	0.0814037	0.076	0.064	4.10508e-24	SC
chr10-10641938-10643495	2.1481e-29	0.071958	0.064	0.053	4.12927e-24	SC
chr9-134644573-134645667	2.23102e-29	0.074642	0.056	0.044	4.28866e-24	SC
chr9-8857022-8858458	2.24424e-29	0.0854163	0.056	0.043	4.31407e-24	SC
chr6-160973128-160975041	2.31069e-29	0.075574	0.066	0.056	4.44182e-24	SC
chr7-41954773-41957016	2.41857e-29	0.0613946	0.091	0.082	4.64919e-24	SC
chr5-122500390-122501851	2.57707e-29	0.0914158	0.053	0.039	4.95388e-24	SC
chr18-5628359-5631221	2.65044e-29	0.0868526	0.063	0.05	5.09492e-24	SC
chrX-65587135-65589088	2.67735e-29	0.085549	0.05	0.037	5.14665e-24	SC
chr1-233613025-233614484	2.70409e-29	0.072671	0.06	0.05	5.19805e-24	SC
chr12-30517920-30519898	3.22329e-29	0.0673023	0.054	0.045	6.1961e-24	SC
chr15-39357522-39358972	3.92126e-29	0.073154	0.066	0.055	7.5378e-24	SC
chr5-74256881-74258369	3.99846e-29	0.0745915	0.052	0.042	7.6862e-24	SC
chr9-81612851-81614041	4.00471e-29	0.0771416	0.064	0.051	7.69822e-24	SC
chr6-37244248-37245379	4.02128e-29	0.0693098	0.076	0.065	7.73007e-24	SC
chr1-164587774-164589451	4.19268e-29	0.0650387	0.06	0.051	8.05954e-24	SC
chr1-39075941-39077345	4.26713e-29	0.0686037	0.065	0.055	8.20265e-24	SC
chr20-58008096-58009528	4.93703e-29	0.0678293	0.055	0.046	9.4904e-24	SC
chr6-168573958-168575806	5.12946e-29	0.0746863	0.052	0.041	9.86031e-24	SC
chr2-238863907-238864797	5.56713e-29	0.0877746	0.051	0.037	1.07016e-23	SC
chr17-76529117-76530755	6.40429e-29	0.0594369	0.077	0.069	1.23109e-23	SC
chr4-54657197-54659080	7.32197e-29	0.0782845	0.076	0.065	1.40749e-23	SC
chr2-69149210-69150261	8.07123e-29	0.0815238	0.061	0.05	1.55152e-23	SC
chr1-61452991-61453978	8.31083e-29	0.0720169	0.067	0.056	1.59758e-23	SC
chr20-50224375-50225297	9.1317e-29	0.0698743	0.058	0.048	1.75538e-23	SC
chr3-192832576-192834147	9.69197e-29	0.0753192	0.058	0.047	1.86308e-23	SC
chr15-38864252-38865745	9.72047e-29	0.071025	0.056	0.046	1.86856e-23	SC
chr2-109317504-109319075	9.97588e-29	0.0718336	0.059	0.048	1.91765e-23	SC
chr2-85998060-85999545	1.21899e-28	0.0698235	0.055	0.045	2.34325e-23	SC
chr10-131997182-131998559	1.49506e-28	0.0754014	0.074	0.063	2.87393e-23	SC
chr1-36320471-36321754	1.55331e-28	0.0693349	0.06	0.05	2.98591e-23	SC
chr2-28643416-28644582	1.90198e-28	0.0773162	0.05	0.038	3.65616e-23	SC
chr1-162695905-162696907	1.91326e-28	0.07572	0.072	0.061	3.67785e-23	SC
chr18-9854344-9856045	1.91497e-28	0.0576006	0.069	0.062	3.68112e-23	SC
chr6-155494458-155495601	2.05227e-28	0.0874815	0.058	0.045	3.94506e-23	SC
chr11-125345383-125346397	2.1373e-28	0.0835326	0.053	0.039	4.10851e-23	SC
chr19-8591732-8593170	2.17104e-28	0.0750963	0.123	0.114	4.17336e-23	SC
chr10-122307467-122309015	2.26773e-28	0.065007	0.069	0.06	4.35923e-23	SC
chr2-237170647-237172435	2.50161e-28	0.0618573	0.063	0.055	4.80882e-23	SC
chr5-122076020-122078756	2.64253e-28	0.07635	0.096	0.087	5.07971e-23	SC
chr9-73038140-73039799	2.84328e-28	0.0759646	0.06	0.048	5.46562e-23	SC
chr5-14440180-14441380	2.99284e-28	0.0719582	0.058	0.048	5.75311e-23	SC
chr5-149386985-149388527	3.22831e-28	0.0637422	0.061	0.052	6.20574e-23	SC
chr2-240962090-240963116	3.24496e-28	0.0679653	0.059	0.048	6.23776e-23	SC
chr17-77470946-77472634	3.66763e-28	0.0654993	0.05	0.04	7.05026e-23	SC
chr6-139250402-139252583	3.97926e-28	0.0804711	0.06	0.049	7.64929e-23	SC
chr18-6740353-6742413	4.19035e-28	0.0626536	0.074	0.067	8.05507e-23	SC
chr6-32092466-32094250	4.21908e-28	0.0516975	0.081	0.076	8.11029e-23	SC
chr7-150340963-150342348	4.46199e-28	0.0658208	0.065	0.057	8.57724e-23	SC
chr13-37868594-37870644	4.57001e-28	0.0852852	0.054	0.04	8.78488e-23	SC
chr9-120937005-120937962	4.71629e-28	0.0715918	0.051	0.041	9.06607e-23	SC
chr4-26992323-26993814	5.19876e-28	0.0689076	0.057	0.048	9.99352e-23	SC
chr6-150924844-150926471	6.35375e-28	0.0693552	0.054	0.045	1.22138e-22	SC
chr2-223612412-223613976	7.87468e-28	0.0745947	0.078	0.069	1.51374e-22	SC
chr3-189098671-189100605	8.07309e-28	0.0665583	0.078	0.07	1.55188e-22	SC
chr4-73668534-73670587	8.30204e-28	0.071671	0.061	0.052	1.59589e-22	SC
chr8-33352616-33354058	8.92982e-28	0.0727197	0.06	0.049	1.71657e-22	SC
chr2-33133330-33135304	8.98466e-28	0.0680637	0.074	0.066	1.72711e-22	SC
chr13-97123942-97126314	9.22431e-28	0.0621742	0.063	0.055	1.77318e-22	SC
chr11-12430439-12431406	9.70324e-28	0.0701828	0.06	0.05	1.86524e-22	SC
chr1-203378415-203379445	1.03825e-27	0.0790492	0.05	0.038	1.99583e-22	SC
chr1-25693955-25695539	1.04934e-27	0.0628423	0.066	0.057	2.01714e-22	SC
chr7-44767840-44769349	1.27126e-27	0.0669355	0.055	0.046	2.44372e-22	SC
chr6-129130048-129131718	1.27157e-27	0.075267	0.058	0.047	2.44432e-22	SC
chr14-91946394-91948153	1.5074e-27	0.0554166	0.057	0.051	2.89765e-22	SC
chr12-12397782-12399149	1.54996e-27	0.088504	0.053	0.039	2.97947e-22	SC
chr11-113161715-113163161	1.57733e-27	0.0700952	0.054	0.043	3.03208e-22	SC
chr16-85435647-85437719	1.84584e-27	0.0412766	0.065	0.062	3.54823e-22	SC
chr5-54645623-54647093	2.0447e-27	0.080397	0.062	0.05	3.93051e-22	SC
chr10-29598500-29599537	2.0986e-27	0.0676861	0.056	0.046	4.03412e-22	SC
chr4-53496847-53498037	2.48414e-27	0.0838467	0.051	0.038	4.77523e-22	SC
chr13-29496058-29497747	2.50434e-27	0.0734378	0.051	0.041	4.81407e-22	SC
chr8-97224449-97226028	2.86658e-27	0.0667303	0.061	0.052	5.51039e-22	SC
chr9-107739510-107740830	2.92951e-27	0.0726598	0.051	0.041	5.63137e-22	SC
chr15-38129354-38131447	3.38703e-27	0.0661293	0.09	0.082	6.51086e-22	SC
chr17-42652964-42654358	3.4533e-27	0.0572997	0.055	0.047	6.63825e-22	SC
chr11-74672393-74673764	4.41687e-27	0.065496	0.059	0.051	8.4905e-22	SC
chr6-105492339-105493629	4.45933e-27	0.0780022	0.054	0.043	8.57212e-22	SC
chr7-2796334-2797361	4.50974e-27	0.0797811	0.055	0.042	8.66903e-22	SC
chr1-15702926-15704165	4.79779e-27	0.0635108	0.061	0.053	9.22274e-22	SC
chr9-69186322-69187663	6.81542e-27	0.0649089	0.05	0.041	1.31012e-21	SC
chr6-160430644-160431614	6.88889e-27	0.080668	0.064	0.053	1.32424e-21	SC
chr3-9035800-9037866	7.62928e-27	0.0599466	0.062	0.055	1.46657e-21	SC
chr1-182119951-182121427	8.96889e-27	0.0701598	0.055	0.045	1.72408e-21	SC
chr10-91590226-91591846	9.53247e-27	0.0602796	0.072	0.064	1.83242e-21	SC
chr10-113384675-113385838	1.12242e-26	0.0748758	0.062	0.051	2.15761e-21	SC
chr12-77231057-77232428	1.1323e-26	0.0705171	0.055	0.045	2.1766e-21	SC
chr8-117730331-117731928	1.21569e-26	0.0763003	0.065	0.053	2.33691e-21	SC
chr1-201916402-201917929	1.24036e-26	0.068132	0.072	0.061	2.38433e-21	SC
chr2-200677177-200678576	1.45629e-26	0.0686209	0.053	0.043	2.7994e-21	SC
chr12-77324460-77325793	1.49047e-26	0.076765	0.057	0.045	2.86511e-21	SC
chr14-53955737-53957105	1.56391e-26	0.0741308	0.075	0.065	3.00629e-21	SC
chr2-105459880-105461475	1.76759e-26	0.0586676	0.062	0.054	3.39782e-21	SC
chr2-217995594-217996778	1.90315e-26	0.0709036	0.052	0.041	3.6584e-21	SC
chr2-177295118-177296507	1.97373e-26	0.0699826	0.053	0.043	3.79408e-21	SC
chr10-70363461-70364969	2.00219e-26	0.0625151	0.082	0.075	3.84878e-21	SC
chr2-100196962-100198987	2.08567e-26	0.0640374	0.063	0.054	4.00927e-21	SC
chr19-51798937-51801101	2.29191e-26	0.0444717	0.077	0.073	4.40571e-21	SC
chr3-72937855-72939027	2.29822e-26	0.0678383	0.061	0.052	4.41784e-21	SC
chr5-138609562-138611926	2.47444e-26	0.0639552	0.057	0.048	4.75658e-21	SC
chr5-149406160-149407400	2.49207e-26	0.0688468	0.057	0.047	4.79048e-21	SC
chr6-32113763-32114448	2.7278e-26	0.0683472	0.064	0.055	5.24363e-21	SC
chr18-11005095-11006241	2.98144e-26	0.07261	0.056	0.047	5.73119e-21	SC
chr4-38752154-38753803	3.63539e-26	0.0653705	0.071	0.063	6.98826e-21	SC
chr12-113271561-113272910	4.88693e-26	0.0623264	0.061	0.053	9.3941e-21	SC
chr20-17634444-17636306	5.44717e-26	0.0632928	0.068	0.06	1.0471e-20	SC
chr18-33439687-33441525	5.8261e-26	0.0774456	0.051	0.039	1.11994e-20	SC
chr18-76050837-76052182	6.70276e-26	0.0585961	0.054	0.045	1.28847e-20	SC
chr11-126414731-126415988	6.93591e-26	0.0613678	0.072	0.064	1.33328e-20	SC
chr1-227946093-227948685	7.1137e-26	0.0560528	0.081	0.075	1.36746e-20	SC
chr6-165846156-165847741	7.29015e-26	0.075592	0.05	0.038	1.40138e-20	SC
chr8-48581064-48583824	7.31032e-26	0.047879	0.086	0.084	1.40525e-20	SC
chr1-203278135-203279268	7.77252e-26	0.0585987	0.09	0.084	1.4941e-20	SC
chr5-56358204-56360076	9.34348e-26	0.0669516	0.063	0.053	1.79609e-20	SC
chr2-145157603-145158628	9.41848e-26	0.0740392	0.053	0.043	1.8105e-20	SC
chr11-122202563-122203424	9.68625e-26	0.0692337	0.053	0.043	1.86198e-20	SC
chr12-32051300-32053092	1.01551e-25	0.0545471	0.06	0.054	1.9521e-20	SC
chr11-33015218-33016601	1.19874e-25	0.0831909	0.055	0.043	2.30433e-20	SC
chr5-151005093-151006673	1.21051e-25	0.0540391	0.099	0.094	2.32696e-20	SC
chr16-85459534-85460326	1.21982e-25	0.0490766	0.054	0.049	2.34485e-20	SC
chr16-49638606-49640468	1.23427e-25	0.0523287	0.058	0.053	2.37262e-20	SC
chr3-139548433-139549688	1.31736e-25	0.0650092	0.072	0.064	2.53235e-20	SC
chr6-108944464-108946250	1.32599e-25	0.0541934	0.109	0.105	2.54894e-20	SC
chr11-121654901-121656852	1.3981e-25	0.033656	0.11	0.112	2.68755e-20	SC
chr3-123391059-123392112	1.43205e-25	0.0748001	0.051	0.04	2.75281e-20	SC
chr16-4263290-4264481	1.48859e-25	0.0719677	0.054	0.043	2.8615e-20	SC
chr6-112561711-112563733	1.59484e-25	0.0675514	0.055	0.045	3.06574e-20	SC
chr7-135193219-135194324	1.84278e-25	0.0578628	0.05	0.043	3.54235e-20	SC
chr1-9412335-9414089	2.02293e-25	0.0436498	0.074	0.071	3.88866e-20	SC
chr6-5204939-5206773	2.18726e-25	0.0675361	0.065	0.056	4.20456e-20	SC
chr9-127185811-127187179	2.60106e-25	0.0573252	0.062	0.054	5e-20	SC
chr17-49514822-49516446	2.61247e-25	0.053187	0.066	0.06	5.02192e-20	SC
chr1-247360068-247361688	2.81168e-25	0.0603778	0.056	0.048	5.40486e-20	SC
chr10-114540698-114542136	2.86645e-25	0.0721327	0.051	0.041	5.51015e-20	SC
chr3-138946627-138947395	3.31835e-25	0.0758203	0.065	0.054	6.37884e-20	SC
chr5-145775115-145776677	3.43061e-25	0.0738553	0.061	0.051	6.59463e-20	SC
chr6-52594831-52596070	3.85363e-25	0.0744896	0.051	0.04	7.40779e-20	SC
chr10-114366603-114368046	3.8826e-25	0.0572341	0.05	0.042	7.46348e-20	SC
chr18-76351755-76352617	4.07269e-25	0.0643811	0.068	0.061	7.82889e-20	SC
chr2-227717030-227718420	4.35088e-25	0.0804695	0.056	0.045	8.36366e-20	SC
chr19-56980521-56981949	4.38086e-25	0.0447467	0.061	0.056	8.42129e-20	SC
chr2-1590631-1592725	4.5759e-25	0.0453678	0.086	0.082	8.79621e-20	SC
chr21-45972612-45974025	6.25166e-25	0.0457876	0.073	0.067	1.20175e-19	SC
chr19-56965985-56967234	6.30896e-25	0.0408678	0.08	0.077	1.21277e-19	SC
chr5-139879890-139881382	6.90584e-25	0.0572432	0.053	0.045	1.3275e-19	SC
chr3-57006753-57008014	7.11013e-25	0.0652425	0.06	0.051	1.36677e-19	SC
chr2-177753624-177754895	7.56816e-25	0.0627789	0.065	0.057	1.45482e-19	SC
chr16-46387554-46387949	7.70825e-25	0.0587875	0.069	0.062	1.48175e-19	SC
chr7-33903765-33905705	8.1697e-25	0.07536	0.059	0.048	1.57045e-19	SC
chr12-93175261-93177483	8.20179e-25	0.0538209	0.069	0.063	1.57662e-19	SC
chr2-100104667-100107242	9.45423e-25	0.0654846	0.061	0.052	1.81738e-19	SC
chr17-1762324-1763575	1.04197e-24	0.0589175	0.05	0.043	2.00296e-19	SC
chr17-55285080-55286272	1.07478e-24	0.0531007	0.07	0.065	2.06605e-19	SC
chr5-41263417-41264787	1.12159e-24	0.0642978	0.062	0.053	2.15602e-19	SC
chr14-23631652-23633427	1.19937e-24	0.0634507	0.06	0.052	2.30554e-19	SC
chr3-14451725-14453519	1.68392e-24	0.037777	0.108	0.108	3.23698e-19	SC
chr2-39511803-39512994	1.68916e-24	0.0539425	0.051	0.045	3.24705e-19	SC
chr3-69306196-69307537	2.09114e-24	0.0568058	0.087	0.082	4.01978e-19	SC
chr10-111075883-111077183	3.10077e-24	0.0677615	0.072	0.064	5.96057e-19	SC
chr7-21944653-21946455	3.21988e-24	0.0534435	0.088	0.083	6.18954e-19	SC
chr1-244272394-244274630	3.24421e-24	0.0532728	0.078	0.072	6.23631e-19	SC
chr10-121596749-121598929	3.84838e-24	0.0482782	0.079	0.076	7.3977e-19	SC
chr16-72072159-72074400	3.98089e-24	0.0649928	0.055	0.047	7.65243e-19	SC
chr11-65291396-65292600	4.06757e-24	0.0470264	0.057	0.051	7.81906e-19	SC
chr6-98832465-98834894	4.71018e-24	0.0721164	0.075	0.064	9.05432e-19	SC
chr4-147116855-147117793	5.64213e-24	0.0737747	0.05	0.04	1.08458e-18	SC
chr10-127417797-127419160	5.90325e-24	0.0596914	0.054	0.046	1.13478e-18	SC
chr2-219642132-219643024	5.91957e-24	0.0660391	0.092	0.085	1.13791e-18	SC
chr2-160164256-160165916	6.2053e-24	0.0573815	0.054	0.047	1.19284e-18	SC
chr16-56190408-56191788	6.21542e-24	0.0696854	0.054	0.043	1.19478e-18	SC
chr5-154275932-154277460	6.35239e-24	0.044662	0.058	0.053	1.22111e-18	SC
chr10-44878271-44879738	6.6369e-24	0.063733	0.069	0.062	1.27581e-18	SC
chr18-7083784-7085051	6.94317e-24	0.0481058	0.054	0.05	1.33468e-18	SC
chr7-114084445-114086324	6.9925e-24	0.0672932	0.09	0.082	1.34416e-18	SC
chr4-122826030-122827769	7.1602e-24	0.0675533	0.069	0.061	1.3764e-18	SC
chr3-142209632-142211182	7.60227e-24	0.0714515	0.056	0.045	1.46138e-18	SC
chr12-7059640-7060932	8.21789e-24	0.0517014	0.081	0.075	1.57972e-18	SC
chr2-19357330-19359120	8.69314e-24	0.0648324	0.063	0.056	1.67107e-18	SC
chr1-20485434-20487139	9.03389e-24	0.0697471	0.054	0.044	1.73658e-18	SC
chr17-19384067-19385230	9.04721e-24	0.0584258	0.059	0.05	1.73914e-18	SC
chr11-134119538-134121455	1.07579e-23	0.0642784	0.072	0.063	2.06798e-18	SC
chr5-39538890-39540075	1.14318e-23	0.0691798	0.054	0.045	2.19752e-18	SC
chr17-50559748-50560737	1.2731e-23	0.0568232	0.055	0.048	2.44726e-18	SC
chr7-94393999-94395926	1.33444e-23	0.0487233	0.094	0.092	2.56519e-18	SC
chr9-70043273-70044993	1.39826e-23	0.0541088	0.07	0.065	2.68786e-18	SC
chr20-10217285-10218350	1.4155e-23	0.0771639	0.052	0.041	2.721e-18	SC
chr12-53658433-53660440	1.50489e-23	0.0528756	0.054	0.048	2.89284e-18	SC
chr19-18649268-18651306	1.78352e-23	0.0454272	0.06	0.055	3.42844e-18	SC
chr10-30454019-30455662	1.83965e-23	0.0517186	0.071	0.063	3.53634e-18	SC
chr13-111005376-111007543	1.84089e-23	0.04173	0.095	0.092	3.53872e-18	SC
chr11-130521796-130523045	1.90037e-23	0.0714041	0.062	0.051	3.65306e-18	SC
chr4-57064488-57066148	2.06499e-23	0.0495909	0.082	0.079	3.96951e-18	SC
chr20-50724394-50725403	2.19329e-23	0.0464483	0.052	0.046	4.21614e-18	SC
chr5-150138110-150139061	2.19459e-23	0.0584439	0.054	0.047	4.21864e-18	SC
chr3-48694543-48695665	2.41824e-23	0.0498092	0.064	0.059	4.64857e-18	SC
chr1-19562967-19564644	2.44781e-23	0.0539873	0.052	0.044	4.70541e-18	SC
chr1-203486658-203488498	2.77035e-23	0.0404999	0.114	0.116	5.32542e-18	SC
chr14-60721379-60724551	2.80168e-23	0.0485631	0.084	0.08	5.38564e-18	SC
chr9-14029882-14031406	2.97346e-23	0.0540534	0.052	0.045	5.71585e-18	SC
chr13-35978300-35980376	3.04717e-23	0.0703515	0.058	0.046	5.85755e-18	SC
chr21-26966771-26967849	3.95791e-23	0.0644783	0.058	0.05	7.60826e-18	SC
chr8-98940099-98941529	4.01901e-23	0.0517703	0.063	0.058	7.72571e-18	SC
chr10-71888574-71889740	4.09531e-23	0.0462752	0.067	0.062	7.87238e-18	SC
chr2-239308465-239309839	4.32777e-23	0.0600921	0.053	0.044	8.31923e-18	SC
chr8-18612741-18614310	5.14977e-23	0.0615372	0.061	0.053	9.89935e-18	SC
chr3-72171193-72172581	5.23883e-23	0.0502849	0.058	0.052	1.00706e-17	SC
chr17-80941288-80943077	5.37789e-23	0.0511986	0.054	0.048	1.03379e-17	SC
chr6-150992216-150993775	6.05034e-23	0.0513837	0.051	0.045	1.16305e-17	SC
chr18-24075809-24077296	6.80748e-23	0.066661	0.06	0.052	1.3086e-17	SC
chr10-58589787-58591221	7.476e-23	0.0551783	0.052	0.045	1.4371e-17	SC
chr3-37765089-37766500	7.49428e-23	0.0510609	0.062	0.056	1.44062e-17	SC
chr3-42031941-42033550	7.85939e-23	0.0410537	0.08	0.079	1.5108e-17	SC
chr12-45356914-45358393	9.02715e-23	0.0478834	0.054	0.047	1.73528e-17	SC
chr17-3888167-3889087	9.3163e-23	0.059816	0.053	0.044	1.79086e-17	SC
chr9-130780003-130782038	1.02105e-22	0.0359752	0.088	0.087	1.96275e-17	SC
chr2-23563217-23564813	1.05964e-22	0.0510842	0.05	0.045	2.03693e-17	SC
chr8-47627443-47628290	1.15748e-22	0.0571976	0.079	0.073	2.22501e-17	SC
chr2-41933811-41934596	1.19474e-22	0.0608498	0.05	0.041	2.29664e-17	SC
chr9-125888884-125890310	1.35949e-22	0.0562724	0.05	0.043	2.61333e-17	SC
chr9-104868556-104869729	1.41472e-22	0.0658241	0.06	0.051	2.71951e-17	SC
chr1-15212409-15213749	1.55382e-22	0.0450783	0.051	0.046	2.9869e-17	SC
chr4-140641530-140642967	1.62986e-22	0.06414	0.05	0.041	3.13307e-17	SC
chr9-137055150-137056359	1.63747e-22	0.0433153	0.055	0.051	3.14769e-17	SC
chr10-78406661-78407882	1.72512e-22	0.0619267	0.056	0.048	3.31619e-17	SC
chr10-88950974-88952242	1.73454e-22	0.0544093	0.066	0.059	3.33428e-17	SC
chr3-81742487-81744828	1.85159e-22	0.048557	0.088	0.086	3.55929e-17	SC
chr6-32139411-32140859	1.91263e-22	0.0419876	0.058	0.054	3.67663e-17	SC
chr4-118888314-118889184	2.15217e-22	0.0663312	0.059	0.05	4.13709e-17	SC
chr9-129253443-129254572	2.49414e-22	0.0536876	0.054	0.047	4.79446e-17	SC
chr1-234969529-234971524	2.82026e-22	0.0313243	0.084	0.084	5.42136e-17	SC
chr10-132065079-132066600	3.03136e-22	0.0569461	0.053	0.046	5.82715e-17	SC
chr19-21438915-21441429	3.1025e-22	0.0345671	0.073	0.071	5.96391e-17	SC
chr19-3284570-3286427	3.56205e-22	0.067067	0.082	0.074	6.8473e-17	SC
chr1-174963672-174965416	3.59534e-22	0.0569573	0.062	0.055	6.91128e-17	SC
chr2-12428204-12429133	3.65009e-22	0.0649304	0.051	0.042	7.01653e-17	SC
chr4-147407315-147409861	3.73584e-22	0.0634291	0.051	0.042	7.18137e-17	SC
chr2-120469190-120470973	4.0057e-22	0.0467063	0.07	0.066	7.70012e-17	SC
chr2-241859058-241860318	4.0886e-22	0.0569436	0.055	0.048	7.85947e-17	SC
chr12-62957106-62958157	4.10238e-22	0.042154	0.058	0.054	7.88597e-17	SC
chr3-86793515-86794972	4.83611e-22	0.0756056	0.053	0.042	9.2964e-17	SC
chr6-157715087-157716541	4.91733e-22	0.0621616	0.053	0.044	9.45253e-17	SC
chr21-45386370-45387382	5.007e-22	0.0534153	0.052	0.045	9.62491e-17	SC
chr10-13956266-13957469	5.30157e-22	0.0592328	0.058	0.051	1.01911e-16	SC
chr18-23618754-23620092	6.22193e-22	0.0547306	0.072	0.066	1.19604e-16	SC
chr10-34739406-34740501	7.17232e-22	0.058217	0.054	0.046	1.37873e-16	SC
chr15-70153783-70155485	8.10723e-22	0.0287348	0.088	0.09	1.55844e-16	SC
chr2-43031869-43033318	8.17005e-22	0.0435605	0.056	0.052	1.57052e-16	SC
chr9-131608278-131609755	1.08619e-21	0.0451973	0.051	0.045	2.08798e-16	SC
chr1-59366769-59368645	1.13599e-21	0.0430941	0.069	0.065	2.18369e-16	SC
chr2-42493124-42495323	1.15858e-21	0.0393624	0.084	0.082	2.22712e-16	SC
chr1-31714141-31715941	2.18969e-21	0.0288531	0.114	0.117	4.20922e-16	SC
chr6-166005277-166006345	2.30129e-21	0.0560198	0.066	0.059	4.42376e-16	SC
chr4-137531767-137533164	2.47985e-21	0.0562966	0.079	0.073	4.76698e-16	SC
chr18-34708829-34710516	2.5624e-21	0.0668434	0.053	0.045	4.92567e-16	SC
chr11-57322084-57322933	2.59995e-21	0.0543959	0.088	0.082	4.99785e-16	SC
chr2-200585556-200586862	2.67782e-21	0.0593922	0.067	0.059	5.14754e-16	SC
chr9-127828006-127829074	2.97857e-21	0.0299223	0.073	0.074	5.72568e-16	SC
chr7-74026646-74027946	3.00631e-21	0.0448495	0.071	0.067	5.779e-16	SC
chr14-68563206-68564530	3.05682e-21	0.0409601	0.054	0.049	5.87609e-16	SC
chr13-110396468-110397789	3.47363e-21	0.0436413	0.078	0.074	6.67733e-16	SC
chr11-11147403-11149242	3.52797e-21	0.0578728	0.059	0.051	6.78178e-16	SC
chr8-49782286-49784308	3.55669e-21	0.0597149	0.051	0.043	6.837e-16	SC
chr6-139596924-139598437	3.65465e-21	0.0495798	0.063	0.058	7.0253e-16	SC
chr11-85684945-85686588	3.7737e-21	0.0459553	0.087	0.085	7.25414e-16	SC
chr8-40123521-40125470	4.17041e-21	0.0491508	0.06	0.054	8.01673e-16	SC
chr8-19093534-19094892	4.3644e-21	0.0589155	0.056	0.048	8.38965e-16	SC
chr12-2163006-2164313	4.44882e-21	0.0566908	0.052	0.043	8.55192e-16	SC
chr12-7091448-7092770	4.65896e-21	0.0469025	0.073	0.068	8.95587e-16	SC
chr13-95643479-95645067	4.76072e-21	0.0583175	0.06	0.053	9.15149e-16	SC
chr13-51769167-51770654	4.94859e-21	0.0617021	0.055	0.047	9.51262e-16	SC
chr2-65075075-65076621	5.41292e-21	0.0524696	0.056	0.049	1.04052e-15	SC
chr10-5070761-5072287	5.65534e-21	0.0527655	0.076	0.07	1.08712e-15	SC
chr7-90210962-90212562	6.00294e-21	0.0479327	0.098	0.098	1.15394e-15	SC
chr7-120052446-120054067	6.45265e-21	0.0432783	0.097	0.099	1.24039e-15	SC
chr3-112640121-112641666	6.97109e-21	0.0615782	0.063	0.056	1.34004e-15	SC
chr5-122310622-122313418	8.62471e-21	0.0498189	0.081	0.075	1.65792e-15	SC
chr3-196380-198509	9.41448e-21	0.0473119	0.06	0.057	1.80974e-15	SC
chr9-69204027-69205554	1.02616e-20	0.0398416	0.054	0.05	1.97258e-15	SC
chr11-76751877-76753672	1.13552e-20	0.0331988	0.071	0.071	2.18281e-15	SC
chr10-104329877-104330796	1.18001e-20	0.0499224	0.051	0.044	2.26833e-15	SC
chr2-105437606-105439327	1.19631e-20	0.040226	0.073	0.071	2.29965e-15	SC
chr1-19504298-19506052	1.22311e-20	0.01705	0.097	0.102	2.35116e-15	SC
chr5-33891242-33893256	1.22365e-20	0.0521855	0.062	0.058	2.35221e-15	SC
chr2-20071185-20072490	1.28394e-20	0.0546901	0.061	0.055	2.46811e-15	SC
chr11-122101468-122102275	1.58775e-20	0.0489865	0.058	0.053	3.05211e-15	SC
chr5-126519372-126520504	1.63162e-20	0.0505013	0.062	0.057	3.13645e-15	SC
chr6-32107726-32109049	1.85089e-20	0.0396736	0.064	0.059	3.55795e-15	SC
chr16-46391142-46391346	2.03339e-20	0.0385248	0.066	0.062	3.90877e-15	SC
chr20-50320529-50322296	2.257e-20	0.0373942	0.074	0.071	4.33861e-15	SC
chr4-41119649-41121176	2.45642e-20	0.0371051	0.064	0.062	4.72195e-15	SC
chr10-114356640-114357862	2.55289e-20	0.0348031	0.05	0.047	4.90739e-15	SC
chr15-60751675-60753656	2.59313e-20	0.0347919	0.06	0.058	4.98475e-15	SC
chr11-95512090-95513462	2.67014e-20	0.0557262	0.06	0.054	5.13278e-15	SC
chr11-117198677-117199659	2.67713e-20	0.0486661	0.057	0.051	5.14621e-15	SC
chr11-10692410-10694181	2.94001e-20	0.0569128	0.051	0.043	5.65155e-15	SC
chr19-17538907-17540623	3.12897e-20	0.0588776	0.055	0.047	6.01478e-15	SC
chr6-148507674-148510148	3.45633e-20	0.0431855	0.066	0.063	6.64406e-15	SC
chr2-176174556-176175588	3.50651e-20	0.0491725	0.05	0.043	6.74053e-15	SC
chr12-121240192-121241736	3.80831e-20	0.0372643	0.06	0.057	7.32068e-15	SC
chr7-42972418-42973752	3.88277e-20	0.0414789	0.067	0.063	7.46381e-15	SC
chr16-70706299-70707543	3.92146e-20	0.0377758	0.059	0.055	7.53818e-15	SC
chr4-122699813-122700790	4.08297e-20	0.0592492	0.053	0.047	7.84865e-15	SC
chr16-56915328-56916307	4.16257e-20	0.0476284	0.05	0.044	8.00167e-15	SC
chr19-6271062-6272583	4.64052e-20	0.0292896	0.055	0.053	8.92042e-15	SC
chr1-72282698-72285325	4.66624e-20	0.0310005	0.111	0.117	8.96987e-15	SC
chr16-12097096-12098070	4.67797e-20	0.0434185	0.05	0.045	8.99242e-15	SC
chr10-18139935-18141509	5.29165e-20	0.0473311	0.064	0.059	1.01721e-14	SC
chr10-29256353-29258144	5.66098e-20	0.0397154	0.056	0.052	1.0882e-14	SC
chr4-11367009-11368040	6.20055e-20	0.0561731	0.06	0.053	1.19192e-14	SC
chr2-38515244-38516131	6.26716e-20	0.033515	0.061	0.059	1.20473e-14	SC
chr22-35995215-35996600	6.97777e-20	0.0462746	0.052	0.046	1.34133e-14	SC
chr4-185566351-185568047	7.08118e-20	0.0476035	0.061	0.055	1.36121e-14	SC
chr1-119711560-119714017	7.11057e-20	0.0419733	0.069	0.067	1.36686e-14	SC
chr5-17189406-17190768	7.14296e-20	0.054266	0.052	0.046	1.37308e-14	SC
chr7-114413579-114415825	7.37439e-20	0.052577	0.052	0.047	1.41757e-14	SC
chr14-101927777-101928975	7.67233e-20	0.0366151	0.056	0.052	1.47484e-14	SC
chr2-226754707-226755757	8.56444e-20	0.0508849	0.05	0.044	1.64633e-14	SC
chr8-123450249-123451478	1.01353e-19	0.0562525	0.056	0.049	1.9483e-14	SC
chr12-52010008-52010686	1.08627e-19	0.0417993	0.06	0.056	2.08812e-14	SC
chr1-201945774-201946944	1.11834e-19	0.0511063	0.064	0.058	2.14978e-14	SC
chr16-55502113-55503409	1.15252e-19	0.0374817	0.056	0.053	2.21548e-14	SC
chr12-54559875-54561587	1.18808e-19	0.0567047	0.071	0.065	2.28384e-14	SC
chr2-10057186-10058077	1.20324e-19	0.0481806	0.05	0.046	2.31297e-14	SC
chr8-80697187-80698919	1.27888e-19	0.0472025	0.058	0.053	2.45838e-14	SC
chr5-180330445-180331994	1.2847e-19	0.0447648	0.058	0.054	2.46957e-14	SC
chr8-120035867-120037014	1.49243e-19	0.0447401	0.052	0.048	2.86889e-14	SC
chr2-20481902-20483876	1.50079e-19	0.053403	0.053	0.047	2.88495e-14	SC
chr11-44030114-44031310	1.52279e-19	0.0501679	0.065	0.06	2.92724e-14	SC
chr11-43987083-43988706	1.56213e-19	0.0322342	0.074	0.073	3.00287e-14	SC
chr7-28036511-28037669	1.57976e-19	0.048933	0.051	0.045	3.03675e-14	SC
chr2-55922226-55924212	1.65559e-19	0.0433569	0.078	0.076	3.18252e-14	SC
chr1-113978823-113979664	1.69972e-19	0.052427	0.059	0.053	3.26736e-14	SC
chr19-16292698-16294476	1.79444e-19	0.0140697	0.095	0.099	3.44943e-14	SC
chr1-151130939-151132372	1.85438e-19	0.0488612	0.059	0.053	3.56465e-14	SC
chr3-136786051-136787668	2.12955e-19	0.0409743	0.052	0.047	4.09362e-14	SC
chr3-73624432-73625719	2.13773e-19	0.0409414	0.074	0.073	4.10934e-14	SC
chr22-42688067-42689252	2.16159e-19	0.033817	0.064	0.062	4.15519e-14	SC
chr12-49868578-49870046	2.18388e-19	0.0249969	0.088	0.089	4.19806e-14	SC
chr4-113052273-113053298	2.19676e-19	0.0534591	0.053	0.047	4.22281e-14	SC
chr5-41509237-41510905	2.44607e-19	0.047873	0.063	0.059	4.70206e-14	SC
chr13-48749264-48751384	2.68139e-19	0.0402926	0.064	0.062	5.1544e-14	SC
chr11-62444191-62445759	2.75481e-19	0.0401801	0.053	0.048	5.29554e-14	SC
chr2-229406711-229407601	2.92358e-19	0.0574743	0.064	0.056	5.61997e-14	SC
chr14-21038477-21039478	2.93193e-19	0.0487593	0.055	0.05	5.63603e-14	SC
chr12-7859618-7861030	3.35569e-19	0.043015	0.063	0.059	6.45061e-14	SC
chr15-100349383-100351011	3.35625e-19	0.0314082	0.084	0.084	6.45169e-14	SC
chr19-46470704-46472350	3.46574e-19	0.00863511	0.052	0.055	6.66216e-14	SC
chr7-90573936-90575102	3.47572e-19	0.0520619	0.054	0.049	6.68133e-14	SC
chr17-2171609-2172790	3.89784e-19	0.0384903	0.051	0.046	7.49278e-14	SC
chr8-98382002-98383478	4.31386e-19	0.0266477	0.074	0.074	8.29249e-14	SC
chr8-73990896-73992644	4.80686e-19	0.0386996	0.088	0.085	9.24018e-14	SC
chr15-68607934-68609032	5.57321e-19	0.0413449	0.055	0.051	1.07133e-13	SC
chr5-113250067-113250892	6.57276e-19	0.0601837	0.059	0.051	1.26347e-13	SC
chr10-68230716-68232262	6.89822e-19	0.0460885	0.051	0.046	1.32604e-13	SC
chr17-32936292-32937647	7.74159e-19	0.0415756	0.053	0.049	1.48816e-13	SC
chr12-52081968-52083659	7.74239e-19	0.034324	0.063	0.061	1.48831e-13	SC
chr17-50686363-50687743	8.61533e-19	0.0316556	0.06	0.058	1.65612e-13	SC
chr3-177780861-177782417	8.73343e-19	0.0542877	0.05	0.043	1.67882e-13	SC
chr19-46638025-46639968	8.74092e-19	0.0223395	0.084	0.085	1.68026e-13	SC
chr20-10218517-10219808	8.92975e-19	0.0594812	0.052	0.044	1.71656e-13	SC
chr7-4693996-4695624	9.04266e-19	0.0328932	0.058	0.056	1.73826e-13	SC
chr3-24042180-24043332	9.10008e-19	0.0487965	0.052	0.046	1.7493e-13	SC
chr2-170529880-170531066	9.41532e-19	0.0518844	0.053	0.047	1.8099e-13	SC
chr3-171838110-171838700	9.93447e-19	0.0545805	0.055	0.049	1.90969e-13	SC
chr14-35384051-35385995	1.17398e-18	0.0405369	0.068	0.064	2.25674e-13	SC
chr9-70600427-70602783	1.23557e-18	0.0299493	0.102	0.104	2.37513e-13	SC
chr2-218003731-218004424	1.30962e-18	0.0526619	0.05	0.043	2.51747e-13	SC
chr19-35308925-35310652	1.32214e-18	0.0165846	0.073	0.076	2.54154e-13	SC
chr14-58636809-58638916	1.37925e-18	0.0305853	0.081	0.082	2.65131e-13	SC
chr2-231399414-231400790	1.71917e-18	0.0398686	0.052	0.048	3.30474e-13	SC
chr2-28634799-28635835	1.89974e-18	0.033535	0.057	0.055	3.65185e-13	SC
chr17-42512184-42513479	1.95193e-18	0.0118604	0.069	0.071	3.75217e-13	SC
chr6-151239512-151240544	2.20084e-18	0.041848	0.053	0.048	4.23066e-13	SC
chr4-1308951-1310089	2.24129e-18	0.0328024	0.064	0.063	4.30841e-13	SC
chr3-54891179-54892130	2.40824e-18	0.0493374	0.052	0.046	4.62934e-13	SC
chr11-126317694-126319291	2.42734e-18	0.0416944	0.054	0.049	4.66606e-13	SC
chr11-65478726-65479521	2.48134e-18	0.0257407	0.062	0.061	4.76986e-13	SC
chr5-66595754-66596744	2.54118e-18	0.0520078	0.071	0.067	4.88489e-13	SC
chr4-102438081-102439666	2.54519e-18	0.055807	0.05	0.043	4.8926e-13	SC
chr22-23098153-23099797	2.89216e-18	0.0308353	0.052	0.049	5.55958e-13	SC
chr14-52067615-52070055	3.08772e-18	0.0181509	0.102	0.108	5.93549e-13	SC
chr1-27527966-27529633	3.09655e-18	0.0200888	0.086	0.09	5.95247e-13	SC
chr19-11202820-11204445	3.10299e-18	0.0214001	0.074	0.075	5.96485e-13	SC
chr3-172323844-172325090	3.15775e-18	0.0413453	0.051	0.047	6.07011e-13	SC
chr3-126266621-126267974	3.52484e-18	0.0299489	0.069	0.069	6.77576e-13	SC
chr5-90871322-90872167	3.53238e-18	0.0590335	0.05	0.043	6.79027e-13	SC
chr1-223343690-223344872	3.5657e-18	0.0341444	0.06	0.058	6.85432e-13	SC
chr11-61368564-61370256	3.64321e-18	0.0392643	0.055	0.052	7.0033e-13	SC
chr3-72152258-72153342	3.69476e-18	0.0421519	0.05	0.047	7.1024e-13	SC
chr20-44720473-44721902	3.7497e-18	0.028846	0.057	0.056	7.20801e-13	SC
chr11-352435-353667	3.83942e-18	0.037881	0.052	0.048	7.38048e-13	SC
chr15-98547340-98549134	4.10097e-18	0.0389318	0.05	0.045	7.88325e-13	SC
chr3-188348354-188349901	4.10971e-18	0.042859	0.05	0.046	7.90005e-13	SC
chr15-92714059-92716022	4.14947e-18	0.0293639	0.069	0.069	7.97648e-13	SC
chr10-125015405-125017226	4.28825e-18	0.0369496	0.057	0.054	8.24326e-13	SC
chr14-63203584-63205332	4.38231e-18	0.0332052	0.081	0.08	8.42407e-13	SC
chr20-36943450-36944766	4.92624e-18	0.0327519	0.054	0.051	9.46966e-13	SC
chr3-188051005-188052937	5.19053e-18	0.0222484	0.11	0.118	9.97771e-13	SC
chr11-69939082-69940547	5.2321e-18	0.038472	0.063	0.059	1.00576e-12	SC
chr8-33564832-33565828	5.29443e-18	0.0396537	0.064	0.06	1.01774e-12	SC
chr11-77072795-77074097	5.3302e-18	0.0490291	0.069	0.064	1.02462e-12	SC
chr7-129829706-129831200	6.52774e-18	0.0293178	0.084	0.084	1.25482e-12	SC
chr12-93812672-93814769	6.62662e-18	0.0268018	0.076	0.076	1.27383e-12	SC
chr2-169732934-169734756	7.10337e-18	0.0450258	0.08	0.077	1.36547e-12	SC
chr1-21337880-21339278	7.24061e-18	0.0260248	0.078	0.079	1.39186e-12	SC
chr1-183234185-183235751	8.1567e-18	0.0398722	0.066	0.063	1.56795e-12	SC
chr5-123156248-123158528	9.63747e-18	0.0315283	0.069	0.069	1.8526e-12	SC
chr10-11163948-11166382	9.73497e-18	0.0327606	0.084	0.082	1.87134e-12	SC
chr3-119034076-119035237	1.12143e-17	0.041545	0.074	0.074	2.15572e-12	SC
chr7-1054388-1055847	1.12826e-17	0.0332947	0.063	0.062	2.16884e-12	SC
chr8-42195806-42197134	1.27763e-17	0.0396813	0.051	0.048	2.45597e-12	SC
chr10-34280290-34281508	1.2979e-17	0.0481151	0.057	0.051	2.49493e-12	SC
chr6-79946422-79948198	1.31604e-17	0.0641805	0.055	0.047	2.52981e-12	SC
chr17-19727259-19728829	1.34393e-17	0.0258438	0.069	0.069	2.58341e-12	SC
chr13-112711052-112712983	1.43772e-17	0.0151318	0.108	0.117	2.76371e-12	SC
chr20-50644951-50646312	1.50084e-17	0.0219101	0.072	0.073	2.88505e-12	SC
chr22-18043978-18045735	1.59949e-17	0.020476	0.062	0.063	3.07469e-12	SC
chr20-50305031-50305652	1.81132e-17	0.0354055	0.051	0.048	3.48188e-12	SC
chr11-12156300-12157823	1.82314e-17	0.0405068	0.054	0.05	3.5046e-12	SC
chr17-32483341-32483995	2.10078e-17	0.052427	0.054	0.048	4.0383e-12	SC
chr12-93818295-93819458	2.27839e-17	0.0393653	0.051	0.048	4.37973e-12	SC
chr9-109250702-109251791	2.34251e-17	0.0365792	0.053	0.05	4.50299e-12	SC
chr12-114683788-114685109	2.51658e-17	0.0322771	0.142	0.148	4.83759e-12	SC
chr6-169451869-169453119	2.66186e-17	0.0379485	0.061	0.059	5.11687e-12	SC
chr9-130445330-130446913	2.74041e-17	0.0182379	0.078	0.081	5.26785e-12	SC
chr9-33139490-33140258	2.74609e-17	0.0365531	0.05	0.047	5.27878e-12	SC
chr4-80036063-80037789	2.98877e-17	0.0423043	0.059	0.056	5.74528e-12	SC
chr6-35485131-35486698	3.32761e-17	0.023526	0.08	0.084	6.39663e-12	SC
chr9-2125523-2127022	3.43009e-17	0.0396378	0.053	0.049	6.59363e-12	SC
chr6-109866851-109868368	3.9116e-17	0.0430066	0.05	0.046	7.51924e-12	SC
chr1-12595795-12596694	4.10425e-17	0.0349252	0.052	0.048	7.88956e-12	SC
chr2-98148440-98149769	4.68199e-17	0.0408741	0.052	0.048	9.00014e-12	SC
chr9-87336899-87338418	4.87504e-17	0.0256642	0.051	0.049	9.37124e-12	SC
chr2-189178555-189179979	5.00922e-17	0.0415525	0.055	0.051	9.62918e-12	SC
chr2-1729815-1732528	6.16595e-17	0.0240189	0.069	0.069	1.18528e-11	SC
chr10-30811457-30812905	6.53628e-17	0.0175993	0.076	0.079	1.25646e-11	SC
chr4-184168168-184169736	6.66515e-17	0.051963	0.051	0.045	1.28124e-11	SC
chr11-67365804-67367415	6.9558e-17	0.0270881	0.05	0.048	1.33711e-11	SC
chr12-1576218-1577316	8.49572e-17	0.0213791	0.057	0.057	1.63312e-11	SC
chr5-126513315-126514603	9.48449e-17	0.0267625	0.081	0.083	1.82319e-11	SC
chr8-98944086-98944583	9.67081e-17	0.0440173	0.057	0.052	1.85901e-11	SC
chr6-152129166-152130792	9.90008e-17	0.0300407	0.068	0.069	1.90308e-11	SC
chr12-57610280-57611679	9.98531e-17	0.034671	0.053	0.049	1.91947e-11	SC
chr3-152595962-152597078	1.04912e-16	0.0405818	0.057	0.053	2.01672e-11	SC
chr15-55587428-55589180	1.05132e-16	0.0297069	0.051	0.049	2.02095e-11	SC
chr1-31954449-31955302	1.08946e-16	0.0307829	0.052	0.049	2.09426e-11	SC
chr10-78944341-78945602	1.27057e-16	0.0302014	0.054	0.052	2.4424e-11	SC
chr13-111065909-111068001	1.35653e-16	0.0238027	0.058	0.058	2.60764e-11	SC
chr17-55575551-55577993	1.41421e-16	0.0372577	0.053	0.05	2.71851e-11	SC
chr2-42959092-42960034	1.59984e-16	0.0219528	0.06	0.06	3.07536e-11	SC
chr6-152061425-152063778	1.69432e-16	0.03478	0.054	0.052	3.25697e-11	SC
chr3-46628621-46630582	1.70071e-16	0.0314154	0.061	0.06	3.26926e-11	SC
chr11-45209299-45210653	1.82668e-16	0.0471248	0.062	0.057	3.5114e-11	SC
chr20-50292307-50293410	2.21719e-16	0.0260291	0.059	0.058	4.26209e-11	SC
chr21-43331586-43334083	2.22244e-16	0.0166384	0.062	0.064	4.27217e-11	SC
chr21-36134169-36136519	2.31394e-16	0.0199473	0.087	0.09	4.44807e-11	SC
chr17-68377768-68379243	2.36999e-16	0.0266953	0.079	0.078	4.55581e-11	SC
chr6-37704939-37706430	2.42287e-16	0.034389	0.053	0.05	4.65746e-11	SC
chr1-29124250-29125490	2.74934e-16	0.0403761	0.05	0.045	5.28503e-11	SC
chr1-171141151-171143337	2.89293e-16	0.030455	0.098	0.097	5.56105e-11	SC
chr1-223362935-223365452	3.00777e-16	0.0247731	0.068	0.071	5.7818e-11	SC
chr1-196607995-196609878	3.1056e-16	0.0258735	0.092	0.095	5.96985e-11	SC
chr8-127759659-127761319	3.15251e-16	0.0313819	0.066	0.064	6.06003e-11	SC
chr2-127083788-127084504	3.6915e-16	0.0367615	0.058	0.057	7.09612e-11	SC
chr1-44842419-44843749	3.87641e-16	0.023303	0.059	0.06	7.45159e-11	SC
chr21-46056368-46057336	4.21978e-16	0.0264788	0.052	0.049	8.11163e-11	SC
chr7-191085-192563	4.27605e-16	0.0286681	0.053	0.051	8.2198e-11	SC
chr3-124779975-124781502	4.53689e-16	0.0374266	0.057	0.053	8.72123e-11	SC
chr3-183583715-183585062	4.72933e-16	0.0331316	0.061	0.06	9.09114e-11	SC
chr10-5944057-5944956	5.00636e-16	0.038175	0.054	0.05	9.62368e-11	SC
chr5-139131204-139132660	5.20057e-16	0.0368233	0.051	0.047	9.99701e-11	SC
chr1-236063786-236065559	5.35354e-16	0.0289753	0.094	0.096	1.02911e-10	SC
chr2-200615797-200618151	5.55897e-16	0.0394074	0.053	0.05	1.06859e-10	SC
chr15-70110692-70112219	5.72299e-16	0.0267217	0.057	0.055	1.10012e-10	SC
chr11-125494769-125496850	6.37883e-16	0.0384193	0.068	0.065	1.2262e-10	SC
chr8-13471480-13472688	6.50878e-16	0.0488469	0.056	0.049	1.25118e-10	SC
chr18-21241082-21243349	6.55926e-16	0.0214889	0.069	0.073	1.26088e-10	SC
chr12-65881040-65882556	6.638e-16	0.0193821	0.094	0.1	1.27602e-10	SC
chr10-12960152-12961831	6.72835e-16	0.0224993	0.072	0.074	1.29338e-10	SC
chr12-47188345-47190070	6.92067e-16	0.0281687	0.059	0.058	1.33035e-10	SC
chr10-11757115-11758472	7.04342e-16	0.0316837	0.06	0.058	1.35395e-10	SC
chr16-31471473-31473622	7.78542e-16	0.0349323	0.063	0.061	1.49658e-10	SC
chr11-4186961-4188353	8.20258e-16	0.0436624	0.07	0.066	1.57677e-10	SC
chr3-195153947-195155797	8.66106e-16	0.03413	0.06	0.057	1.66491e-10	SC
chr15-42457030-42458606	9.50555e-16	0.0181376	0.061	0.063	1.82724e-10	SC
chr6-136158035-136159661	9.78927e-16	0.0306974	0.058	0.057	1.88178e-10	SC
chr8-38712382-38714660	1.0272e-15	0.0253284	0.056	0.056	1.97457e-10	SC
chr7-41942272-41943552	1.04902e-15	0.0297883	0.061	0.06	2.01652e-10	SC
chr5-141507420-141509397	1.21224e-15	0.0318974	0.072	0.07	2.33028e-10	SC
chr1-19974686-19976456	1.21973e-15	0.0249069	0.064	0.064	2.34468e-10	SC
chr12-113259123-113260769	1.34631e-15	0.0250806	0.05	0.048	2.588e-10	SC
chr4-140048736-140050494	1.3754e-15	0.035919	0.063	0.061	2.64392e-10	SC
chr15-83903601-83905571	1.4662e-15	0.0207633	0.054	0.056	2.81847e-10	SC
chr19-1169473-1170391	1.4831e-15	0.0202887	0.053	0.054	2.85094e-10	SC
chr11-111911421-111912487	1.54346e-15	0.0199133	0.061	0.062	2.96698e-10	SC
chr3-179680510-179682178	1.5616e-15	0.0324526	0.055	0.053	3.00185e-10	SC
chr7-159014678-159016176	1.56514e-15	0.0207816	0.071	0.075	3.00865e-10	SC
chr6-47075687-47077318	1.73547e-15	0.0424633	0.058	0.054	3.33608e-10	SC
chr3-50264331-50265096	1.97014e-15	0.031552	0.069	0.068	3.78717e-10	SC
chr4-20250913-20252913	2.18984e-15	0.0397442	0.067	0.066	4.2095e-10	SC
chr12-31641109-31642061	2.229e-15	0.0278801	0.053	0.053	4.28479e-10	SC
chr6-134316799-134318168	2.24338e-15	0.022203	0.068	0.069	4.31242e-10	SC
chr1-205248612-205249931	2.31185e-15	0.0252175	0.053	0.052	4.44405e-10	SC
chr11-65606567-65607764	2.39469e-15	0.0168518	0.098	0.103	4.60329e-10	SC
chr5-124340803-124342861	2.40224e-15	0.026062	0.056	0.056	4.61781e-10	SC
chr8-53692549-53693842	2.56159e-15	0.0324873	0.057	0.056	4.92412e-10	SC
chr5-151669737-151670825	2.62463e-15	0.0209816	0.053	0.055	5.04531e-10	SC
chr17-77423364-77424149	2.7005e-15	0.0119164	0.064	0.066	5.19114e-10	SC
chr1-91403973-91405116	2.98349e-15	0.0401453	0.07	0.069	5.73514e-10	SC
chr1-167796555-167797871	3.02352e-15	0.0329009	0.061	0.059	5.81207e-10	SC
chr19-3458695-3460263	3.04018e-15	0.0124035	0.076	0.08	5.84411e-10	SC
chr17-50100803-50102396	3.20393e-15	0.0131522	0.061	0.065	6.15888e-10	SC
chr5-172795185-172795820	3.80982e-15	0.0284295	0.065	0.064	7.32358e-10	SC
chr2-42792179-42793754	3.99313e-15	0.0347986	0.06	0.057	7.67596e-10	SC
chr20-53620971-53622151	4.20537e-15	0.0212588	0.055	0.054	8.08395e-10	SC
chr17-57604114-57605738	4.22607e-15	0.0164381	0.054	0.055	8.12374e-10	SC
chr18-50558733-50560855	4.66908e-15	0.0379044	0.051	0.049	8.97532e-10	SC
chr11-64553220-64555904	4.77012e-15	0.0186465	0.062	0.062	9.16956e-10	SC
chr17-7204411-7205512	4.77914e-15	0.032616	0.06	0.057	9.18689e-10	SC
chr10-72030650-72031453	4.92139e-15	0.0254473	0.051	0.049	9.46034e-10	SC
chr22-24247064-24248109	4.97272e-15	0.0292009	0.066	0.065	9.55901e-10	SC
chr3-9768902-9770924	5.27011e-15	0.0187714	0.079	0.081	1.01307e-09	SC
chr12-57893435-57894016	5.53614e-15	0.0298294	0.051	0.049	1.06421e-09	SC
chr6-83429735-83431806	5.55335e-15	0.0302328	0.073	0.074	1.06752e-09	SC
chr8-8599441-8601408	5.71517e-15	0.0161371	0.074	0.077	1.09862e-09	SC
chr2-205754782-205756309	5.84124e-15	0.0237598	0.058	0.058	1.12286e-09	SC
chr4-11423145-11424170	6.10016e-15	0.03043	0.074	0.075	1.17263e-09	SC
chr3-4550739-4551813	6.44737e-15	0.0215892	0.055	0.056	1.23937e-09	SC
chr16-65122071-65124116	6.62269e-15	0.01475	0.102	0.108	1.27307e-09	SC
chr9-127121454-127123739	6.87972e-15	0.003386	0.107	0.115	1.32248e-09	SC
chr9-112492804-112494111	6.88234e-15	0.0235898	0.051	0.051	1.32298e-09	SC
chr5-67267457-67269027	7.217e-15	0.0200498	0.073	0.076	1.38732e-09	SC
chr11-61129418-61130604	7.5864e-15	0.0296715	0.069	0.07	1.45833e-09	SC
chr2-215692483-215694273	7.78581e-15	0.0319664	0.053	0.052	1.49666e-09	SC
chr6-107488763-107490545	9.02652e-15	0.027071	0.085	0.088	1.73516e-09	SC
chr2-9637953-9639560	9.15474e-15	0.0318354	0.051	0.049	1.75981e-09	SC
chr16-84642750-84643809	9.29628e-15	0.0251752	0.054	0.053	1.78701e-09	SC
chr4-182447587-182449473	9.97426e-15	0.0411284	0.072	0.07	1.91734e-09	SC
chr3-46565490-46566695	1.00882e-14	0.0280723	0.058	0.058	1.93925e-09	SC
chr8-19664796-19665933	1.10228e-14	0.0436061	0.051	0.046	2.1189e-09	SC
chr11-44036632-44037706	1.1272e-14	0.0430639	0.053	0.049	2.16681e-09	SC
chr14-50559836-50561407	1.18729e-14	0.0135858	0.082	0.086	2.28232e-09	SC
chr1-17568843-17570251	1.2251e-14	0.0231998	0.065	0.065	2.35499e-09	SC
chr10-125056771-125057952	1.31127e-14	0.0245753	0.068	0.067	2.52064e-09	SC
chr10-88157487-88159261	1.35704e-14	0.0244852	0.052	0.051	2.60862e-09	SC
chr12-51424270-51425498	1.4026e-14	0.0367204	0.055	0.052	2.6962e-09	SC
chr4-38131388-38132638	1.43347e-14	0.0389676	0.054	0.05	2.75555e-09	SC
chr10-96618584-96620555	1.58564e-14	0.0235026	0.065	0.066	3.04806e-09	SC
chr1-150552055-150552914	1.59787e-14	0.029563	0.064	0.062	3.07157e-09	SC
chr2-128562666-128563876	1.60046e-14	0.0312151	0.052	0.05	3.07656e-09	SC
chr17-11597917-11599618	1.64128e-14	0.0342383	0.088	0.089	3.15502e-09	SC
chr14-52312842-52315471	1.76051e-14	0.0135466	0.087	0.093	3.38421e-09	SC
chr2-108376957-108379021	1.90794e-14	0.0373674	0.073	0.07	3.66762e-09	SC
chr10-124104969-124106954	2.05812e-14	0.00767333	0.081	0.089	3.9563e-09	SC
chr1-180953545-180955130	2.12297e-14	0.023225	0.05	0.05	4.08097e-09	SC
chr5-150464144-150465084	2.51849e-14	0.0249176	0.054	0.054	4.84128e-09	SC
chr7-37942736-37944673	2.6638e-14	0.0258878	0.064	0.066	5.1206e-09	SC
chr3-196218942-196220268	3.23601e-14	0.0327954	0.05	0.049	6.22054e-09	SC
chr18-36186806-36188644	3.40431e-14	0.0230172	0.063	0.065	6.54406e-09	SC
chr2-219551872-219553002	3.89741e-14	0.0183944	0.097	0.103	7.49196e-09	SC
chr10-71712607-71714028	3.90137e-14	0.0187776	0.096	0.1	7.49957e-09	SC
chr12-46523797-46525473	3.97054e-14	0.0109459	0.062	0.064	7.63254e-09	SC
chr2-29114419-29116765	4.08711e-14	0.0106997	0.078	0.084	7.8566e-09	SC
chr12-55847566-55848643	4.12714e-14	0.0275396	0.054	0.053	7.93355e-09	SC
chr17-74430254-74431453	4.45133e-14	0.0162077	0.063	0.065	8.55674e-09	SC
chr18-37298785-37300271	4.62431e-14	0.0275067	0.063	0.064	8.88926e-09	SC
chr12-63667775-63669344	4.64923e-14	0.0215313	0.076	0.078	8.93716e-09	SC
chr20-51561909-51563516	4.66639e-14	0.00680932	0.065	0.07	8.97016e-09	SC
chr6-151493320-151495035	4.69472e-14	0.011069	0.069	0.074	9.02461e-09	SC
chr20-47492740-47494279	4.71114e-14	0.00678935	0.063	0.067	9.05617e-09	SC
chr5-66957684-66959929	4.9155e-14	0.021141	0.055	0.056	9.44902e-09	SC
chr21-25638395-25640579	4.98076e-14	0.015073	0.082	0.085	9.57447e-09	SC
chr12-32010301-32011559	5.07641e-14	0.0127063	0.058	0.06	9.75834e-09	SC
chr1-18921776-18923266	5.32252e-14	0.0279042	0.081	0.08	1.02314e-08	SC
chr19-38974744-38976826	5.66e-14	0.00465693	0.051	0.054	1.08802e-08	SC
chr4-184745494-184747257	5.7785e-14	0.024108	0.057	0.057	1.11079e-08	SC
chr12-47811576-47813261	5.79157e-14	0.00368859	0.094	0.103	1.11331e-08	SC
chr7-101912826-101914164	6.26762e-14	0.022967	0.051	0.051	1.20482e-08	SC
chr1-182143130-182144761	6.61214e-14	0.0185161	0.097	0.102	1.27105e-08	SC
chr10-115092185-115094329	6.77715e-14	0.0170451	0.083	0.087	1.30277e-08	SC
chr8-30168674-30169831	7.36889e-14	0.0258705	0.051	0.05	1.41651e-08	SC
chr11-12853246-12854720	7.53274e-14	0.0171882	0.05	0.051	1.44801e-08	SC
chr14-63435392-63436522	8.92132e-14	0.0219201	0.054	0.054	1.71494e-08	SC
chr8-11703533-11704305	8.98446e-14	0.0331665	0.053	0.052	1.72707e-08	SC
chr12-122062678-122063670	1.11996e-13	0.0106676	0.064	0.067	2.15289e-08	SC
chr5-81232390-81233667	1.25655e-13	0.0235929	0.086	0.089	2.41546e-08	SC
chr8-17575958-17578500	1.33405e-13	0.00168486	0.083	0.093	2.56443e-08	SC
chr5-151698607-151699725	1.335e-13	0.0272589	0.061	0.06	2.56626e-08	SC
chr1-87131570-87133015	1.415e-13	0.0326965	0.056	0.054	2.72004e-08	SC
chr4-152352240-152353591	1.44356e-13	0.0353611	0.078	0.078	2.77493e-08	SC
chr1-66271113-66272234	1.44667e-13	0.0225369	0.062	0.062	2.78092e-08	SC
chr11-128548209-128549860	1.6814e-13	0.0105081	0.072	0.075	3.23213e-08	SC
chr8-57994047-57995589	1.69965e-13	0.0297333	0.073	0.073	3.26722e-08	SC
chr12-12890239-12892275	1.76442e-13	0.00644144	0.12	0.132	3.39174e-08	SC
chr8-17660804-17662230	1.82235e-13	0.0118662	0.075	0.079	3.50308e-08	SC
chr12-48199156-48200607	1.87995e-13	0.0207213	0.053	0.053	3.61381e-08	SC
chr8-133485784-133486888	2.06391e-13	0.0336144	0.056	0.053	3.96744e-08	SC
chr10-28838925-28840560	2.30211e-13	0.0150931	0.053	0.054	4.42533e-08	SC
chr6-151763185-151764634	2.39786e-13	0.0054927	0.086	0.094	4.60939e-08	SC
chr5-73748080-73749493	2.49288e-13	0.00818247	0.062	0.065	4.79204e-08	SC
chr3-113210328-113212799	2.55479e-13	0.0170287	0.088	0.094	4.91104e-08	SC
chr9-101485868-101487701	2.60586e-13	0.0176303	0.077	0.079	5.00922e-08	SC
chr8-94261472-94263272	2.62524e-13	0.0316706	0.066	0.065	5.04648e-08	SC
chr9-128921868-128922832	2.84244e-13	0.00984627	0.054	0.058	5.46399e-08	SC
chr6-27687217-27688582	2.85378e-13	0.0135034	0.071	0.076	5.4858e-08	SC
chr17-79977707-79979608	2.8581e-13	0.00316971	0.06	0.063	5.49409e-08	SC
chr4-186143949-186146054	3.00055e-13	0.0290809	0.062	0.061	5.76794e-08	SC
chr10-79101633-79102757	3.06328e-13	0.0167279	0.053	0.055	5.88852e-08	SC
chr19-20610869-20612443	3.08222e-13	0.0121402	0.054	0.057	5.92491e-08	SC
chr10-93436564-93438141	3.33435e-13	0.0188163	0.103	0.108	6.40959e-08	SC
chr1-9241999-9243177	3.4302e-13	0.00610492	0.061	0.067	6.59383e-08	SC
chrX-74535185-74537445	3.59896e-13	0.0194179	0.081	0.085	6.91825e-08	SC
chr19-22531922-22533300	3.64785e-13	0.0132562	0.091	0.097	7.01223e-08	SC
chr11-6318895-6321319	3.7637e-13	0.0057752	0.117	0.128	7.23493e-08	SC
chr3-48989042-48990529	3.95081e-13	0.0121941	0.082	0.089	7.5946e-08	SC
chr6-140461809-140463631	4.06865e-13	0.0276613	0.05	0.049	7.82112e-08	SC
chr11-10930461-10932341	4.10366e-13	0.0138386	0.076	0.08	7.88843e-08	SC
chr17-17824687-17825612	4.11763e-13	0.00586133	0.051	0.053	7.91527e-08	SC
chr4-144645130-144647488	4.37333e-13	0.0288904	0.059	0.06	8.4068e-08	SC
chr9-35537667-35539317	4.4052e-13	0.0156298	0.063	0.066	8.46808e-08	SC
chr2-182865991-182867417	5.07987e-13	0.0292738	0.052	0.051	9.76499e-08	SC
chr11-117884964-117886302	6.3853e-13	0.00488238	0.073	0.079	1.22744e-07	SC
chr9-129450885-129452209	6.54107e-13	0.00844987	0.055	0.057	1.25738e-07	SC
chr12-110223527-110225177	6.62832e-13	0.0156276	0.057	0.058	1.27416e-07	SC
chr17-32927204-32929656	6.73636e-13	0.00858742	0.053	0.056	1.29492e-07	SC
chr21-16279697-16280962	7.56274e-13	0.00488271	0.053	0.056	1.45378e-07	SC
chr6-157812931-157814590	7.73997e-13	0.022158	0.054	0.054	1.48785e-07	SC
chr2-218258809-218259989	7.82414e-13	0.0289117	0.056	0.053	1.50403e-07	SC
chr3-16148302-16149300	9.51229e-13	0.0167512	0.05	0.051	1.82854e-07	SC
chr16-23422812-23424209	1.08291e-12	0.0130579	0.059	0.06	2.08167e-07	SC
chr21-38912805-38913774	1.18136e-12	0.0102317	0.05	0.052	2.27091e-07	SC
chr5-126001809-126003626	1.18709e-12	0.0286948	0.053	0.052	2.28194e-07	SC
chr1-234533989-234534841	1.18857e-12	0.010436	0.058	0.061	2.28477e-07	SC
chr6-135901419-135903445	1.21779e-12	0.00712372	0.069	0.073	2.34095e-07	SC
chr11-134033619-134034472	1.22846e-12	0.0223371	0.08	0.081	2.36145e-07	SC
chr2-174012280-174013840	1.25234e-12	0.0130043	0.063	0.066	2.40736e-07	SC
chr1-234543933-234544877	1.36893e-12	0.0210891	0.054	0.055	2.63148e-07	SC
chr8-12725881-12727278	1.45601e-12	0.0173297	0.054	0.055	2.79887e-07	SC
chr21-45438474-45440083	1.53963e-12	0.00704855	0.063	0.067	2.95961e-07	SC
chr3-152556592-152558091	1.60089e-12	0.0345919	0.062	0.06	3.07737e-07	SC
chr12-65740634-65742873	1.66173e-12	0.0175311	0.052	0.054	3.19433e-07	SC
chr6-148760762-148762224	1.66939e-12	0.0158815	0.065	0.069	3.20904e-07	SC
chr11-68256213-68257986	1.69295e-12	0.0189021	0.05	0.05	3.25434e-07	SC
chr6-32045917-32048473	1.70356e-12	0.0289269	0.055	0.054	3.27473e-07	SC
chr1-153677659-153679973	1.79638e-12	0.0100287	0.068	0.071	3.45317e-07	SC
chr1-110412357-110413536	1.87981e-12	0.00830398	0.074	0.081	3.61353e-07	SC
chr4-185534494-185535749	1.88086e-12	0.0240863	0.063	0.064	3.61556e-07	SC
chr2-231189786-231191118	1.9654e-12	0.0254896	0.054	0.053	3.77807e-07	SC
chr10-122062333-122063651	2.00874e-12	0.0208188	0.069	0.071	3.86139e-07	SC
chr6-144326442-144328045	2.09765e-12	0.0246808	0.072	0.073	4.0323e-07	SC
chr4-86593680-86595612	2.281e-12	0.00818908	0.137	0.152	4.38475e-07	SC
chr3-64265659-64267090	2.36772e-12	0.00975347	0.069	0.074	4.55144e-07	SC
chr22-42769369-42770636	2.37871e-12	0.0060926	0.054	0.06	4.57257e-07	SC
chr8-38734349-38735181	2.43856e-12	0.0345058	0.072	0.071	4.68762e-07	SC
chr3-154120714-154122319	2.55081e-12	0.023565	0.07	0.073	4.90339e-07	SC
chr6-169789322-169791041	2.62701e-12	0.0166294	0.065	0.068	5.04988e-07	SC
chr21-14887207-14889772	2.77165e-12	0.0129199	0.048	0.05	5.32791e-07	SC
chr5-62431781-62433379	2.79314e-12	0.0155402	0.048	0.05	5.36923e-07	SC
chr4-128659811-128661149	2.95439e-12	0.0141346	0.065	0.069	5.67919e-07	SC
chr6-52511583-52512704	3.20397e-12	0.0255975	0.051	0.05	6.15896e-07	SC
chr1-41108589-41110298	3.40936e-12	0.00151955	0.081	0.089	6.55377e-07	SC
chr5-80140960-80142649	3.48884e-12	0.00659429	0.068	0.074	6.70657e-07	SC
chr12-69533789-69535509	3.51249e-12	0.00946054	0.06	0.063	6.75203e-07	SC
chrX-53280351-53282171	3.61864e-12	0.0362716	0.057	0.055	6.95607e-07	SC
chr7-100826904-100828169	4.50843e-12	0.0063072	0.074	0.079	8.66652e-07	SC
chr17-43906014-43908445	4.64134e-12	0.0124112	0.058	0.06	8.922e-07	SC
chr4-168831532-168833584	4.94498e-12	0.0115449	0.094	0.101	9.50569e-07	SC
chr2-69153359-69154949	6.1121e-12	0.00551156	0.053	0.057	1.17492e-06	SC
chr4-83535271-83537116	7.68669e-12	0.00919455	0.086	0.092	1.4776e-06	SC
chr15-98896221-98897499	8.07615e-12	0.0133485	0.06	0.063	1.55247e-06	SC
chr14-75452287-75453544	8.58986e-12	0.00183093	0.057	0.062	1.65122e-06	SC
chr3-49217702-49219057	9.20076e-12	0.00289899	0.057	0.061	1.76865e-06	SC
chr4-15478503-15480280	9.60251e-12	0.0213988	0.061	0.063	1.84588e-06	SC
chr4-128385995-128387714	9.74615e-12	0.0153277	0.082	0.087	1.87349e-06	SC
chr1-168135460-168137763	9.83235e-12	0.00700525	0.065	0.071	1.89006e-06	SC
chr6-169212926-169215008	1.01754e-11	0.00584904	0.065	0.07	1.956e-06	SC
chr5-172418084-172418775	1.10521e-11	0.0123311	0.067	0.071	2.12452e-06	SC
chr1-244300319-244301438	1.13524e-11	0.0182159	0.058	0.06	2.18227e-06	SC
chr10-110221447-110222212	1.13927e-11	0.0181212	0.056	0.057	2.19e-06	SC
chr4-5708087-5709392	1.1498e-11	0.0133685	0.052	0.053	2.21026e-06	SC
chr2-109690460-109691690	1.21263e-11	0.0217736	0.054	0.055	2.33103e-06	SC
chr15-78809998-78812289	1.21906e-11	0.00383979	0.063	0.066	2.34338e-06	SC
chr4-121072120-121073188	1.22332e-11	0.0239185	0.055	0.056	2.35157e-06	SC
chr3-11508455-11510011	1.26897e-11	0.00366154	0.058	0.063	2.43933e-06	SC
chr4-121711340-121712525	1.3571e-11	0.0325991	0.061	0.06	2.60873e-06	SC
chr1-39690945-39692838	1.46501e-11	0.0216391	0.062	0.065	2.81617e-06	SC
chr3-111736866-111738485	1.48696e-11	0.0203469	0.059	0.061	2.85837e-06	SC
chr6-146857170-146858278	1.65274e-11	0.0345131	0.059	0.057	3.17705e-06	SC
chr8-93699678-93701559	1.8222e-11	0.0195685	0.059	0.061	3.5028e-06	SC
chr8-11676474-11677356	1.84676e-11	0.0158413	0.05	0.052	3.55001e-06	SC
chr9-121288832-121289976	1.93479e-11	0.00698873	0.067	0.071	3.71923e-06	SC
chr10-110837176-110838105	2.24043e-11	2.35325e-05	0.055	0.059	4.30675e-06	SC
chr4-15231177-15233556	2.3104e-11	0.0202055	0.051	0.052	4.44126e-06	SC
chr6-119077171-119079404	2.32968e-11	0.0206326	0.07	0.072	4.47832e-06	SC
chr1-3312399-3314150	2.40783e-11	0.000463773	0.067	0.073	4.62855e-06	SC
chr6-11794406-11795865	2.6674e-11	0.0191015	0.05	0.051	5.12752e-06	SC
chr12-26195084-26196704	2.73824e-11	0.0107679	0.059	0.063	5.2637e-06	SC
chr1-91725451-91726772	3.01736e-11	0.0130751	0.066	0.068	5.80024e-06	SC
chr9-134640924-134641850	3.16982e-11	0.0130011	0.055	0.057	6.09331e-06	SC
chr1-76867230-76869311	3.20886e-11	0.0232432	0.053	0.055	6.16835e-06	SC
chr15-90557274-90558416	3.27777e-11	0.00608729	0.051	0.053	6.30082e-06	SC
chr3-152834338-152836176	3.36679e-11	0.0182776	0.072	0.075	6.47194e-06	SC
chr12-47715038-47716366	3.74333e-11	0.0124265	0.055	0.058	7.19578e-06	SC
chr19-16315639-16316868	3.81271e-11	0.0046636	0.052	0.054	7.32914e-06	SC
chr7-76297149-76297686	3.85059e-11	0.00798334	0.048	0.051	7.40196e-06	SC
chr6-90295289-90297726	4.05698e-11	0.00389374	0.098	0.108	7.79869e-06	SC
chr6-16724779-16726429	4.15303e-11	0.00437537	0.063	0.068	7.98333e-06	SC
chr2-66432819-66433763	4.74377e-11	0.00718419	0.068	0.073	9.11889e-06	SC
chr3-149179728-149181227	5.08269e-11	0.0248545	0.061	0.061	9.7704e-06	SC
chr9-134365668-134366928	5.95159e-11	0.0113063	0.057	0.06	1.14407e-05	SC
chr19-47663403-47664775	6.09726e-11	0.00173779	0.05	0.054	1.17207e-05	SC
chr12-123150154-123152408	6.15442e-11	0.00729656	0.058	0.061	1.18306e-05	SC
chr8-80577617-80579496	6.35633e-11	0.0059342	0.09	0.098	1.22187e-05	SC
chr3-11600368-11601151	6.50346e-11	0.00880602	0.053	0.056	1.25015e-05	SC
chr17-14308682-14310359	6.58881e-11	0.00351971	0.073	0.082	1.26656e-05	SC
chr1-19494357-19496639	6.89309e-11	0.00691359	0.053	0.056	1.32505e-05	SC
chr21-38906677-38907644	6.98935e-11	0.0101203	0.062	0.064	1.34356e-05	SC
chr5-80082272-80083882	7.13469e-11	0.013488	0.058	0.061	1.3715e-05	SC
chr3-40583690-40585288	7.30754e-11	0.0231632	0.05	0.049	1.40472e-05	SC
chr5-141524358-141525446	7.54286e-11	0.0154774	0.064	0.067	1.44996e-05	SC
chr6-134249328-134250497	7.716e-11	0.0114372	0.054	0.056	1.48324e-05	SC
chr1-54272742-54274086	7.72334e-11	0.00454375	0.083	0.089	1.48465e-05	SC
chr16-4944406-4945784	7.83073e-11	0.00604431	0.071	0.077	1.50529e-05	SC
chr11-8870260-8871869	8.3219e-11	3.70684e-05	0.07	0.077	1.59971e-05	SC
chr1-45265580-45266688	8.32223e-11	0.00429327	0.059	0.063	1.59977e-05	SC
chr9-121566412-121568948	8.43094e-11	0.000433708	0.061	0.065	1.62067e-05	SC
chr4-84582124-84584133	9.6031e-11	0.0107795	0.102	0.114	1.84599e-05	SC
chr14-65095107-65096961	9.80701e-11	0.00299819	0.054	0.058	1.88519e-05	SC
chr17-15502287-15503464	1.01363e-10	0.00450184	0.048	0.052	1.94848e-05	SC
chr15-31365232-31366887	1.06839e-10	0.00889612	0.075	0.083	2.05375e-05	SC
chr12-92505092-92506295	1.13531e-10	0.016064	0.053	0.053	2.18239e-05	SC
chr11-45859363-45860282	1.22468e-10	0.0159347	0.05	0.052	2.35419e-05	SC
chr7-24756465-24758044	1.33201e-10	0.00137274	0.07	0.077	2.56051e-05	SC
chr3-37786461-37787842	1.39284e-10	0.0123271	0.049	0.051	2.67745e-05	SC
chr3-126388813-126390009	1.48157e-10	0.0144035	0.06	0.063	2.848e-05	SC
chr5-59356846-59358837	1.56532e-10	0.0208921	0.048	0.05	3.00901e-05	SC
chr11-123100356-123102083	1.7291e-10	0.00590822	0.05	0.053	3.32384e-05	SC
chr5-111223199-111224998	1.91487e-10	0.0364579	0.05	0.047	3.68093e-05	SC
chr2-237661203-237663221	1.9628e-10	0.0155779	0.053	0.054	3.77308e-05	SC
chr2-43636661-43638185	2.10412e-10	0.0149985	0.082	0.088	4.04474e-05	SC
chr4-158093455-158095326	2.17854e-10	0.00287422	0.062	0.068	4.18779e-05	SC
chr1-158010436-158011475	2.31511e-10	0.00261172	0.055	0.059	4.4503e-05	SC
chr13-41694664-41696765	2.49875e-10	0.0131845	0.054	0.055	4.80332e-05	SC
chr2-39467421-39469546	2.66625e-10	0.00307454	0.047	0.051	5.12531e-05	SC
chr1-173429291-173430458	2.71175e-10	0.0185286	0.056	0.058	5.21277e-05	SC
chr10-24951543-24953585	2.8457e-10	0.00462216	0.053	0.056	5.47027e-05	SC
chr12-106195068-106196046	3.10735e-10	0.0101009	0.046	0.05	5.97322e-05	SC
chr2-189551909-189553155	3.31625e-10	0.00868929	0.056	0.06	6.37479e-05	SC
chr4-82798219-82799766	3.53833e-10	0.0119801	0.071	0.076	6.80169e-05	SC
chr10-71727433-71728675	3.5638e-10	0.0043564	0.051	0.054	6.85066e-05	SC
chr9-108885345-108886942	3.82685e-10	0.0141876	0.049	0.051	7.35632e-05	SC
chr11-43920346-43921254	3.86411e-10	0.00818837	0.075	0.081	7.42793e-05	SC
chr11-2096892-2098261	3.96531e-10	0.00903746	0.056	0.058	7.62247e-05	SC
chr6-136737493-136738851	4.30229e-10	0.0103457	0.05	0.052	8.27025e-05	SC
chr4-86891431-86892741	4.60829e-10	0.0170253	0.05	0.051	8.85847e-05	SC
chr15-70853317-70854859	4.67682e-10	0.002826	0.053	0.057	8.9902e-05	SC
chr2-100281437-100282403	5.50578e-10	0.0184021	0.055	0.055	0.000105837	SC
chr1-48469802-48471277	5.9121e-10	0.00579075	0.051	0.055	0.000113648	SC
chr3-49198568-49200179	5.91262e-10	0.00629535	0.057	0.06	0.000113658	SC
chr11-61070322-61072248	6.029e-10	0.00368631	0.058	0.062	0.000115895	SC
chr4-24794242-24796127	6.19971e-10	0.0139855	0.06	0.063	0.000119176	SC
chr3-11153692-11155706	6.33234e-10	0.0123648	0.054	0.056	0.000121726	SC
chr21-44337666-44338663	6.37405e-10	0.0084612	0.056	0.059	0.000122528	SC
chr16-70750386-70751439	6.44839e-10	0.00879041	0.048	0.05	0.000123957	SC
chr8-66438065-66439921	7.02852e-10	0.0229987	0.065	0.066	0.000135108	SC
chr6-152575036-152576656	7.08592e-10	0.00769533	0.052	0.055	0.000136212	SC
chr11-77473754-77474928	9.28157e-10	0.00679486	0.052	0.055	0.000178419	SC
chr4-72567428-72568722	1.01645e-09	0.0114901	0.061	0.064	0.000195392	SC
chr3-9248874-9250082	1.17974e-09	0.00703037	0.059	0.063	0.000226779	SC
chr6-130364980-130367026	1.23616e-09	0.00913487	0.079	0.085	0.000237625	SC
chr18-55243602-55244951	1.4456e-09	0.00424488	0.058	0.062	0.000277886	SC
chr7-25849416-25850210	1.67336e-09	0.00407474	0.057	0.062	0.000321668	SC
chr11-76798376-76799660	1.67701e-09	0.00558928	0.052	0.055	0.000322371	SC
chr3-173394906-173396897	1.71851e-09	0.0165744	0.075	0.079	0.000330348	SC
chr10-109883847-109884811	1.74136e-09	0.010189	0.051	0.053	0.00033474	SC
chr2-74714631-74716065	1.76917e-09	0.0155802	0.057	0.06	0.000340085	SC
chr8-124425152-124426769	1.79521e-09	0.0201329	0.052	0.053	0.000345091	SC
chr7-100603706-100604965	1.95096e-09	0.0125848	0.051	0.053	0.000375031	SC
chr14-56004697-56006258	2.01841e-09	0.0115578	0.047	0.05	0.000387997	SC
chr7-140541263-140542999	2.04099e-09	0.00677165	0.053	0.057	0.000392337	SC
chr10-27741893-27742852	2.84867e-09	0.00657521	0.058	0.063	0.000547598	SC
chr6-35497107-35498261	3.02343e-09	0.00402333	0.057	0.061	0.00058119	SC
chr15-57375894-57377675	3.07693e-09	0.00286129	0.048	0.051	0.000591476	SC
chr8-143840381-143842361	3.2045e-09	0.00317574	0.085	0.093	0.000615998	SC
chr5-157510969-157512248	3.33253e-09	0.00747084	0.062	0.065	0.000640609	SC
chr3-119702367-119704150	3.52137e-09	0.00146156	0.094	0.105	0.000676909	SC
chr14-72726018-72727300	3.52452e-09	0.000419468	0.052	0.057	0.000677515	SC
chr4-128600348-128601786	3.6086e-09	0.00334916	0.06	0.064	0.000693678	SC
chr6-153130520-153132440	3.85536e-09	0.00778333	0.05	0.053	0.000741112	SC
chr1-109667429-109668756	3.94826e-09	0.0122454	0.054	0.057	0.000758969	SC
chr3-173397124-173398399	4.08122e-09	0.0148412	0.052	0.055	0.00078453	SC
chr1-59150640-59152132	4.09135e-09	0.00115409	0.059	0.064	0.000786477	SC
chr11-59172456-59173705	4.24039e-09	0.00381463	0.047	0.052	0.000815127	SC
chr11-66408206-66409677	4.43657e-09	0.0110065	0.053	0.054	0.000852837	SC
chr6-46491021-46492357	4.74817e-09	0.00480352	0.054	0.058	0.000912735	SC
chr2-186693579-186694625	5.57678e-09	0.0146648	0.051	0.053	0.00107202	SC
chr8-63219123-63220899	5.59587e-09	0.00525993	0.048	0.052	0.00107569	SC
chr6-85449269-85450754	5.94278e-09	0.00841652	0.071	0.075	0.00114238	SC
chr7-143881722-143883135	6.61325e-09	0.0114743	0.063	0.067	0.00127126	SC
chr1-156705513-156707188	7.87186e-09	0.00604126	0.049	0.052	0.0015132	SC
chr5-134511158-134512689	9.17352e-09	0.00867777	0.048	0.051	0.00176342	SC
chr8-102728177-102728972	1.02579e-08	0.00837581	0.049	0.051	0.00197187	SC
chr15-101126720-101128473	1.0856e-08	0.000534997	0.049	0.052	0.00208684	SC
chr4-16898022-16899323	1.12148e-08	0.014659	0.053	0.055	0.0021558	SC
chr7-94655637-94656644	1.12946e-08	0.00784151	0.052	0.055	0.00217114	SC
chr12-62190791-62192944	1.17665e-08	0.00310655	0.048	0.052	0.00226187	SC
chr15-91942341-91943533	1.2107e-08	0.00202427	0.049	0.054	0.00232732	SC
chr1-243420129-243422219	1.27144e-08	0.0047515	0.046	0.05	0.00244408	SC
chr7-143391281-143392567	1.27279e-08	0.0126021	0.049	0.05	0.00244668	SC
chr7-11212020-11213618	1.29294e-08	2.53192e-05	0.046	0.05	0.0024854	SC
chr10-86969804-86970455	1.50964e-08	0.00742404	0.051	0.053	0.00290196	SC
chr17-2054484-2055176	1.55542e-08	0.00440851	0.054	0.057	0.00298997	SC
chr6-140345282-140346998	1.66753e-08	0.00390729	0.052	0.056	0.00320547	SC
chr1-68322506-68323818	1.69086e-08	0.00126709	0.045	0.05	0.00325032	SC
chr9-2620937-2621955	1.85473e-08	0.00266268	0.058	0.062	0.00356533	SC
chr9-106920823-106921996	1.96391e-08	0.00333904	0.053	0.057	0.0037752	SC
chr11-117876122-117877002	2.40882e-08	0.00489252	0.048	0.051	0.00463045	SC
chr9-33150771-33151807	2.43336e-08	0.00115959	0.053	0.057	0.00467763	SC
chr6-28657031-28659250	2.46765e-08	0.00237488	0.051	0.056	0.00474354	SC
chr20-22795300-22796836	2.97866e-08	0.00215065	0.049	0.052	0.00572585	SC
chr5-36301775-36302722	3.05246e-08	0.0049516	0.054	0.058	0.00586771	SC
chr7-25950380-25952236	3.44009e-08	0.00136512	0.056	0.061	0.00661286	SC
chr6-109001266-109002800	3.78594e-08	0.000804837	0.05	0.055	0.00727767	SC
chr4-72568912-72570082	3.85927e-08	0.00535643	0.067	0.073	0.00741864	SC
chr8-58593826-58595629	4.04587e-08	0.00884497	0.049	0.051	0.00777734	SC
chr20-13994621-13996538	4.2587e-08	0.00315306	0.073	0.081	0.00818646	SC
chr3-40970887-40972657	4.38496e-08	0.00830521	0.053	0.054	0.00842917	SC
chrX-91434455-91435808	4.48011e-08	0.0190179	0.049	0.05	0.00861208	SC
chr14-37171654-37172885	4.55698e-08	0.0110306	0.051	0.054	0.00875983	SC
chr1-168342175-168343096	4.81376e-08	0.0173069	0.05	0.051	0.00925345	SC
chr11-124898247-124899262	5.45522e-08	0.0101706	0.052	0.054	0.0104865	SC
chr20-14336596-14337879	6.31412e-08	0.00506027	0.067	0.074	0.0121376	SC
chr14-94581179-94582894	6.7674e-08	0.00114291	0.048	0.051	0.0130089	SC
chr9-19153524-19154660	6.91508e-08	0.00620194	0.048	0.051	0.0132928	SC
chr9-4299223-4300222	6.94524e-08	0.00263758	0.055	0.059	0.0133508	SC
chr6-52517396-52518340	8.99042e-08	0.00286349	0.058	0.063	0.0172822	SC
chr10-62056772-62057795	1.33603e-07	0.0101753	0.052	0.054	0.0256825	SC
chr3-93972647-93974236	1.40558e-07	0.00146523	0.076	0.083	0.0270193	SC
chr4-183987170-183988854	2.35255e-07	0.00258039	0.05	0.054	0.0452229	SC
chr6-85966290-85967482	2.38934e-07	0.000875075	0.047	0.052	0.04593	SC
chr13-98910212-98910923	2.63223e-187	0.750753	0.124	0.004	5.05992e-182	EC
chr12-96445340-96446401	1.07119e-184	0.75637	0.129	0.005	2.05915e-179	EC
chr14-38255771-38256717	1.12525e-184	0.765955	0.133	0.006	2.16306e-179	EC
chr6-150452402-150453398	1.61458e-146	0.661693	0.111	0.005	3.10369e-141	EC
chr13-59632967-59633808	2.67648e-146	0.644355	0.1	0.004	5.14498e-141	EC
chr9-121325364-121326834	7.54123e-139	0.703163	0.159	0.019	1.44964e-133	EC
chr22-39282844-39283860	1.88038e-137	0.662483	0.119	0.009	3.61463e-132	EC
chr12-6171403-6172348	1.77926e-136	0.64488	0.108	0.006	3.42026e-131	EC
chr3-194639792-194640786	6.91903e-136	0.654737	0.117	0.008	1.33004e-130	EC
chr12-6124317-6125158	2.13637e-135	0.621266	0.1	0.005	4.10673e-130	EC
chr3-195030709-195031875	2.5321e-135	0.6358	0.105	0.005	4.86743e-130	EC
chr6-169851488-169852429	1.31815e-134	0.611215	0.095	0.004	2.53387e-129	EC
chr13-40313255-40314175	2.00432e-133	0.633229	0.108	0.006	3.85288e-128	EC
chr22-49657050-49658093	9.96649e-133	0.608792	0.096	0.004	1.91585e-127	EC
chr5-149062323-149063389	2.2282e-132	0.650348	0.116	0.008	4.28325e-127	EC
chr6-3323709-3324839	1.08244e-129	0.634151	0.117	0.009	2.08077e-124	EC
chr8-10715855-10716567	3.29539e-128	0.619335	0.097	0.005	6.33469e-123	EC
chr9-136511738-136512432	2.11579e-127	0.634047	0.11	0.008	4.06716e-122	EC
chr22-19524256-19524716	1.2057e-122	0.554411	0.076	0.002	2.3177e-117	EC
chr12-96164899-96165939	1.3789e-122	0.588828	0.088	0.004	2.65065e-117	EC
chr11-76588299-76589141	6.8816e-122	0.60781	0.099	0.006	1.32284e-116	EC
chr1-221393974-221394851	1.46631e-120	0.577465	0.087	0.004	2.81868e-115	EC
chr6-148367256-148368001	2.18978e-120	0.618928	0.111	0.008	4.20939e-115	EC
chr9-27117200-27118102	3.27885e-120	0.596004	0.096	0.005	6.3029e-115	EC
chr6-150683209-150683723	8.90584e-120	0.578165	0.087	0.004	1.71196e-114	EC
chr2-204321602-204322670	6.57802e-119	0.593321	0.098	0.006	1.26449e-113	EC
chr1-47211691-47212588	9.28605e-119	0.5828	0.092	0.005	1.78505e-113	EC
chr1-212166309-212167455	2.59563e-118	0.595251	0.1	0.006	4.98956e-113	EC
chr2-146873767-146874741	5.12474e-118	0.589626	0.092	0.005	9.85123e-113	EC
chr16-81861419-81862450	3.6589e-117	0.571078	0.086	0.004	7.03347e-112	EC
chr5-111066288-111067127	6.71094e-117	0.570662	0.086	0.004	1.29004e-111	EC
chr1-226002001-226002959	7.58758e-117	0.61872	0.122	0.012	1.45855e-111	EC
chr15-52261402-52262236	1.29168e-115	0.599982	0.107	0.008	2.48298e-110	EC
chr11-128567979-128568714	9.05829e-114	0.574552	0.092	0.005	1.74127e-108	EC
chr8-108948514-108949161	1.28189e-113	0.587117	0.097	0.007	2.46417e-108	EC
chr3-128555029-128555749	3.36234e-113	0.552512	0.081	0.004	6.46339e-108	EC
chr2-71491665-71492463	5.26781e-113	0.545723	0.08	0.003	1.01263e-107	EC
chr7-51121848-51122524	8.47148e-112	0.5531	0.083	0.004	1.62846e-106	EC
chr4-105990435-105991367	1.80761e-111	0.584646	0.098	0.007	3.47474e-106	EC
chr2-233051288-233052012	9.78426e-111	0.554785	0.085	0.004	1.88082e-105	EC
chr6-11218695-11219400	1.92135e-110	0.571838	0.093	0.006	3.69339e-105	EC
chr2-177143357-177143829	2.30101e-110	0.533457	0.074	0.003	4.4232e-105	EC
chr7-22444485-22445816	2.84259e-110	0.599728	0.115	0.011	5.46428e-105	EC
chr21-27448801-27449329	3.00176e-110	0.529006	0.073	0.002	5.77026e-105	EC
chr3-128482854-128483447	8.64261e-110	0.538497	0.078	0.003	1.66136e-104	EC
chr11-128334347-128335067	9.59118e-110	0.540041	0.08	0.003	1.8437e-104	EC
chr3-196611803-196612672	1.47046e-109	0.544003	0.082	0.004	2.82664e-104	EC
chr12-62785659-62786531	3.70033e-109	0.577906	0.096	0.007	7.11311e-104	EC
chr11-19676239-19676771	6.14158e-109	0.55091	0.081	0.004	1.18059e-103	EC
chr1-79006368-79007002	7.99203e-109	0.550202	0.082	0.004	1.5363e-103	EC
chr11-124759407-124760123	9.98728e-109	0.560931	0.089	0.005	1.91985e-103	EC
chr8-61759543-61760543	1.87316e-107	0.552043	0.087	0.005	3.60076e-102	EC
chr12-105484863-105486126	3.68878e-107	0.597898	0.122	0.015	7.09091e-102	EC
chr3-159711485-159712037	2.22377e-106	0.538941	0.077	0.003	4.27472e-101	EC
chr19-45211497-45212540	4.72704e-106	0.564216	0.097	0.008	9.08674e-101	EC
chr19-45955718-45956618	6.17769e-106	0.526507	0.076	0.003	1.18753e-100	EC
chr4-102139021-102139655	8.83938e-106	0.537156	0.078	0.004	1.69918e-100	EC
chr6-164097566-164098378	2.16368e-105	0.535833	0.078	0.004	4.15922e-100	EC
chr4-123340245-123340708	2.61635e-105	0.533139	0.076	0.003	5.02939e-100	EC
chr8-95692908-95693915	1.45226e-104	0.58442	0.111	0.011	2.79167e-99	EC
chr18-48680413-48681326	1.90265e-103	0.580912	0.109	0.011	3.65744e-98	EC
chr17-82844946-82845784	3.66415e-103	0.5517	0.092	0.007	7.04355e-98	EC
chr10-63670060-63670813	7.28786e-103	0.562086	0.099	0.008	1.40094e-97	EC
chr10-35378962-35379694	1.40811e-102	0.544245	0.086	0.006	2.7068e-97	EC
chr11-33207180-33208074	1.60005e-102	0.536115	0.083	0.005	3.07577e-97	EC
chr2-127659331-127660073	3.18608e-102	0.54304	0.086	0.005	6.12457e-97	EC
chr15-101167411-101168806	6.37233e-102	0.587739	0.128	0.018	1.22495e-96	EC
chr8-127931390-127932167	8.25154e-102	0.552023	0.09	0.007	1.58618e-96	EC
chr8-127205883-127207200	1.3125e-101	0.550562	0.092	0.007	2.52301e-96	EC
chr3-194930320-194931263	2.57473e-101	0.561709	0.1	0.009	4.94938e-96	EC
chr19-3683391-3684155	4.08783e-101	0.541231	0.087	0.006	7.858e-96	EC
chr3-169148833-169149682	4.74499e-101	0.576066	0.11	0.012	9.12124e-96	EC
chr5-132085975-132086810	7.14235e-101	0.540753	0.087	0.006	1.37297e-95	EC
chr5-172748218-172748870	7.5681e-101	0.551173	0.093	0.007	1.45481e-95	EC
chr2-176518787-176519253	8.70327e-101	0.509287	0.07	0.003	1.67302e-95	EC
chr11-76823425-76824506	2.16885e-100	0.529711	0.083	0.005	4.16916e-95	EC
chr6-12584805-12585880	3.52505e-100	0.550329	0.093	0.007	6.77616e-95	EC
chr12-119673395-119673963	3.98748e-100	0.51225	0.073	0.003	7.6651e-95	EC
chr16-77585260-77586195	6.2402e-100	0.52582	0.079	0.004	1.19955e-94	EC
chr3-30342983-30343697	9.61809e-100	0.509181	0.072	0.003	1.84888e-94	EC
chr3-143443536-143444437	1.85314e-99	0.540747	0.089	0.007	3.56227e-94	EC
chr3-149615529-149616218	2.78437e-99	0.544432	0.092	0.007	5.35236e-94	EC
chr4-121594347-121595359	3.4829e-99	0.534171	0.085	0.005	6.69515e-94	EC
chr9-113500977-113501592	4.37932e-99	0.521243	0.077	0.004	8.41832e-94	EC
chr8-141038326-141038917	6.51089e-99	0.529332	0.085	0.006	1.25158e-93	EC
chr18-35458744-35459329	1.48179e-98	0.541362	0.091	0.007	2.84844e-93	EC
chr10-95334094-95335081	5.31959e-98	0.541956	0.091	0.007	1.02258e-92	EC
chr2-154537760-154538267	7.05279e-98	0.480914	0.065	0.002	1.35575e-92	EC
chr13-28408242-28408949	7.07539e-98	0.52153	0.08	0.005	1.36009e-92	EC
chr20-50046645-50047559	1.15956e-97	0.541329	0.093	0.008	2.22901e-92	EC
chr21-33968101-33969356	2.55175e-97	0.541523	0.093	0.008	4.9052e-92	EC
chr3-179671593-179672182	3.74386e-97	0.537592	0.089	0.007	7.19678e-92	EC
chr5-139462567-139463025	3.77759e-97	0.499969	0.07	0.003	7.26162e-92	EC
chr11-128709318-128709766	7.23957e-97	0.489068	0.066	0.002	1.39166e-91	EC
chr20-8812442-8813256	1.37728e-96	0.528117	0.084	0.006	2.64752e-91	EC
chr17-35801472-35801962	2.15575e-96	0.501495	0.073	0.004	4.14399e-91	EC
chr13-44932592-44933319	2.58944e-96	0.543349	0.095	0.008	4.97765e-91	EC
chr12-91987946-91988585	3.88536e-96	0.501574	0.073	0.004	7.46879e-91	EC
chr2-36541491-36542482	4.53049e-96	0.533748	0.086	0.006	8.70892e-91	EC
chr1-244163617-244164376	1.13131e-95	0.53315	0.092	0.007	2.17471e-90	EC
chr12-131229301-131230387	1.25791e-95	0.54304	0.093	0.008	2.41807e-90	EC
chr8-141096145-141096812	1.5037e-95	0.509738	0.078	0.005	2.89055e-90	EC
chr12-70691072-70691668	4.87907e-95	0.507932	0.075	0.004	9.37899e-90	EC
chr22-50656054-50656959	4.91192e-95	0.502716	0.076	0.004	9.44213e-90	EC
chr3-172857106-172857701	6.31875e-95	0.497401	0.072	0.003	1.21465e-89	EC
chr5-116788769-116789428	9.37882e-95	0.479877	0.064	0.002	1.80288e-89	EC
chr18-62450551-62451419	1.25571e-94	0.53616	0.093	0.009	2.41385e-89	EC
chr1-153608549-153609555	2.22613e-94	0.572431	0.125	0.018	4.27926e-89	EC
chr5-137695694-137696783	4.13079e-94	0.529184	0.09	0.008	7.94057e-89	EC
chr22-32830181-32830892	6.24004e-94	0.512699	0.08	0.005	1.19952e-88	EC
chr22-19620810-19621652	1.0172e-93	0.497046	0.072	0.004	1.95534e-88	EC
chr12-51911871-51912686	2.44477e-93	0.524406	0.083	0.006	4.69957e-88	EC
chr16-57316503-57317035	2.76439e-93	0.495318	0.072	0.004	5.31395e-88	EC
chr14-61307884-61308788	3.10181e-93	0.489258	0.069	0.003	5.96259e-88	EC
chr19-34269864-34270541	4.45311e-93	0.535534	0.097	0.009	8.56017e-88	EC
chr3-43393863-43394619	7.30538e-93	0.507258	0.079	0.005	1.40431e-87	EC
chr1-220876534-220877107	7.66711e-93	0.501529	0.075	0.004	1.47384e-87	EC
chr12-89212217-89213002	1.53714e-92	0.504296	0.077	0.005	2.95483e-87	EC
chr11-58004370-58004977	1.69066e-92	0.483437	0.066	0.003	3.24993e-87	EC
chr18-56458843-56459795	1.97316e-92	0.501234	0.076	0.005	3.79299e-87	EC
chr15-52294714-52296075	2.15946e-92	0.534647	0.096	0.009	4.15111e-87	EC
chr5-141805499-141806252	2.33663e-92	0.494758	0.071	0.003	4.49168e-87	EC
chr13-44422350-44423281	2.75809e-92	0.520032	0.086	0.007	5.30184e-87	EC
chr6-170010888-170011935	3.4423e-92	0.519445	0.086	0.007	6.6171e-87	EC
chr1-43300467-43301082	3.50535e-92	0.492834	0.072	0.004	6.73829e-87	EC
chr6-104638481-104639432	4.04886e-92	0.519606	0.084	0.007	7.78309e-87	EC
chr13-112978725-112979507	4.83501e-92	0.513018	0.083	0.006	9.29429e-87	EC
chr10-114748649-114749303	4.94614e-92	0.475467	0.065	0.002	9.50791e-87	EC
chr7-75611295-75612341	1.09252e-91	0.546231	0.108	0.014	2.10015e-86	EC
chr1-24720010-24720541	1.21058e-91	0.526112	0.09	0.008	2.32708e-86	EC
chr4-109575941-109576999	1.42899e-91	0.517909	0.086	0.007	2.74694e-86	EC
chr5-58244904-58245787	1.89204e-91	0.483862	0.069	0.003	3.63706e-86	EC
chr3-46406961-46407507	1.98146e-91	0.504694	0.08	0.006	3.80895e-86	EC
chr21-42263436-42263985	2.34272e-91	0.488786	0.072	0.004	4.50339e-86	EC
chr11-128328789-128329645	2.98377e-91	0.503513	0.078	0.005	5.73568e-86	EC
chr14-100142135-100142851	5.43642e-91	0.519361	0.084	0.007	1.04504e-85	EC
chr2-221455121-221455666	5.57693e-91	0.479004	0.066	0.003	1.07205e-85	EC
chr12-92753948-92754743	7.50212e-91	0.492329	0.072	0.004	1.44213e-85	EC
chr18-7370430-7371210	9.29928e-91	0.503863	0.079	0.006	1.78759e-85	EC
chr2-233084252-233084922	1.02463e-90	0.500087	0.076	0.005	1.96963e-85	EC
chr12-70645498-70646338	1.04306e-90	0.538931	0.101	0.011	2.00506e-85	EC
chr1-159889687-159890321	2.53612e-90	0.519221	0.083	0.007	4.87516e-85	EC
chr13-28494990-28495725	2.73374e-90	0.498617	0.079	0.005	5.25504e-85	EC
chr7-100835645-100836628	6.16046e-90	0.547464	0.111	0.015	1.18422e-84	EC
chr5-140311954-140312615	6.92562e-90	0.48131	0.071	0.004	1.33131e-84	EC
chr2-172329366-172330147	9.72409e-90	0.498984	0.078	0.005	1.86925e-84	EC
chr6-49565426-49566251	1.4556e-89	0.49206	0.071	0.004	2.79809e-84	EC
chr7-30869728-30870473	1.62312e-89	0.49852	0.077	0.005	3.1201e-84	EC
chr7-150586294-150587182	2.44968e-89	0.503517	0.08	0.005	4.709e-84	EC
chr12-105586938-105587610	3.25754e-89	0.471987	0.066	0.003	6.26194e-84	EC
chr8-126496761-126497474	4.35098e-89	0.490325	0.073	0.005	8.36384e-84	EC
chr8-127161785-127162334	4.36418e-89	0.467613	0.064	0.002	8.38922e-84	EC
chr20-64038558-64039595	4.73732e-89	0.524245	0.097	0.011	9.10651e-84	EC
chr20-53897871-53898549	4.78424e-89	0.477551	0.072	0.004	9.19669e-84	EC
chr2-142185710-142186329	8.61509e-89	0.485112	0.069	0.004	1.65607e-83	EC
chr6-151040787-151041483	9.30399e-89	0.549954	0.115	0.016	1.7885e-83	EC
chr19-7188439-7189478	2.03782e-88	0.532611	0.103	0.012	3.91729e-83	EC
chr14-58098309-58098968	2.86278e-88	0.464563	0.063	0.003	5.5031e-83	EC
chr6-36822743-36823293	2.92294e-88	0.496573	0.077	0.005	5.61874e-83	EC
chr1-169744883-169745750	4.28403e-88	0.501287	0.08	0.006	8.23515e-83	EC
chr3-185045398-185046114	5.15994e-88	0.500553	0.078	0.005	9.9189e-83	EC
chr9-14238053-14238924	5.55685e-88	0.517402	0.092	0.009	1.06819e-82	EC
chr1-246608561-246609416	8.75908e-88	0.526511	0.096	0.01	1.68375e-82	EC
chr3-114121933-114122644	1.32751e-87	0.509572	0.083	0.007	2.55186e-82	EC
chr9-85527416-85528106	1.35034e-87	0.473382	0.066	0.003	2.59575e-82	EC
chr11-95715637-95716263	1.95528e-87	0.476033	0.068	0.004	3.75861e-82	EC
chr4-112083109-112083894	2.05643e-87	0.474154	0.069	0.004	3.95305e-82	EC
chr2-46351485-46352053	3.27444e-87	0.495974	0.078	0.005	6.29443e-82	EC
chr18-45755528-45756353	3.39967e-87	0.493909	0.076	0.005	6.53515e-82	EC
chr6-3812934-3813611	6.30768e-87	0.488212	0.073	0.005	1.21252e-81	EC
chr10-92690240-92691303	7.00601e-87	0.512598	0.089	0.008	1.34676e-81	EC
chr7-155205055-155205780	7.30917e-87	0.504304	0.086	0.007	1.40503e-81	EC
chr11-61595063-61595901	7.87336e-87	0.48726	0.075	0.005	1.51349e-81	EC
chr7-29177918-29178585	8.43329e-87	0.480007	0.07	0.004	1.62112e-81	EC
chr4-16858174-16858653	1.85905e-86	0.450073	0.059	0.002	3.57364e-81	EC
chr9-109907238-109907981	2.71073e-86	0.494341	0.077	0.006	5.21081e-81	EC
chr5-142426103-142427123	3.32219e-86	0.484232	0.073	0.004	6.38621e-81	EC
chr3-111923939-111924846	3.864e-86	0.496373	0.077	0.006	7.42773e-81	EC
chr13-28754764-28755531	3.8641e-86	0.478686	0.073	0.005	7.42791e-81	EC
chr11-58024180-58025004	4.04722e-86	0.497743	0.079	0.006	7.77993e-81	EC
chr17-75706867-75707581	7.38155e-86	0.491656	0.078	0.006	1.41895e-80	EC
chr10-55410297-55410933	8.30438e-86	0.472619	0.066	0.004	1.59634e-80	EC
chr9-131270169-131270902	9.52071e-86	0.503727	0.086	0.008	1.83016e-80	EC
chr1-155166092-155168137	1.22995e-85	0.559125	0.155	0.032	2.36431e-80	EC
chr6-148364002-148364432	1.23482e-85	0.447134	0.06	0.002	2.37369e-80	EC
chr15-62173031-62173633	1.2481e-85	0.458446	0.063	0.003	2.39922e-80	EC
chr14-61320660-61321925	1.38047e-85	0.526315	0.102	0.013	2.65366e-80	EC
chr14-76843961-76844841	1.73332e-85	0.464901	0.066	0.003	3.33194e-80	EC
chr1-46806313-46807038	3.1948e-85	0.490111	0.078	0.006	6.14133e-80	EC
chr6-144343680-144344321	6.37418e-85	0.489063	0.077	0.005	1.2253e-79	EC
chr10-30188040-30188888	1.04237e-84	0.484738	0.076	0.005	2.00374e-79	EC
chr5-147963726-147964540	1.31963e-84	0.468166	0.065	0.003	2.53671e-79	EC
chr4-17336326-17336947	2.60645e-84	0.45877	0.065	0.003	5.01036e-79	EC
chr1-204461260-204461980	2.61611e-84	0.4754	0.072	0.005	5.02893e-79	EC
chr7-22589407-22590170	5.01758e-84	0.492354	0.079	0.006	9.64525e-79	EC
chr12-26869930-26871378	5.04714e-84	0.509342	0.092	0.009	9.70207e-79	EC
chr16-66381979-66383234	5.17543e-84	0.505723	0.09	0.009	9.94867e-79	EC
chr12-3122662-3123615	5.379e-84	0.516532	0.097	0.012	1.034e-78	EC
chr2-172311780-172312316	6.15601e-84	0.464721	0.066	0.004	1.18336e-78	EC
chr19-6233196-6234466	6.91055e-84	0.520599	0.109	0.015	1.32841e-78	EC
chr9-136662356-136662958	7.41971e-84	0.478694	0.071	0.005	1.42628e-78	EC
chr4-123343460-123344131	9.85374e-84	0.490261	0.078	0.006	1.89417e-78	EC
chr15-46088815-46089508	1.06379e-83	0.442029	0.057	0.002	2.04491e-78	EC
chr2-187136454-187137111	1.17493e-83	0.478234	0.071	0.004	2.25855e-78	EC
chr5-87899224-87900175	1.43373e-83	0.48276	0.073	0.005	2.75604e-78	EC
chr4-165838490-165838932	2.50117e-83	0.442354	0.059	0.002	4.80797e-78	EC
chr1-56411489-56412341	2.65178e-83	0.47904	0.073	0.005	5.0975e-78	EC
chr10-19003154-19003811	4.4767e-83	0.442864	0.059	0.002	8.60552e-78	EC
chr1-39132497-39133383	4.60127e-83	0.495221	0.081	0.007	8.84497e-78	EC
chr7-92717625-92718617	6.27498e-83	0.52318	0.101	0.013	1.20623e-77	EC
chr3-169387752-169388440	7.8492e-83	0.458022	0.066	0.003	1.50884e-77	EC
chr7-2606778-2607709	9.37973e-83	0.48339	0.076	0.006	1.80306e-77	EC
chr13-106919269-106920280	1.13816e-82	0.520305	0.106	0.015	2.18788e-77	EC
chr2-71500235-71500847	2.42784e-82	0.455629	0.064	0.003	4.667e-77	EC
chr12-94587808-94588230	2.64531e-82	0.449956	0.062	0.003	5.08506e-77	EC
chr8-23223653-23225465	2.97505e-82	0.522591	0.11	0.016	5.7189e-77	EC
chr6-157128956-157129852	3.03592e-82	0.46977	0.069	0.004	5.83593e-77	EC
chr11-69448871-69449971	3.27797e-82	0.481492	0.078	0.007	6.30121e-77	EC
chr14-75523740-75524314	6.54238e-82	0.462514	0.066	0.004	1.25764e-76	EC
chr18-7271954-7273879	6.79458e-82	0.535334	0.131	0.024	1.30611e-76	EC
chr12-96255007-96255507	7.94345e-82	0.462332	0.068	0.004	1.52696e-76	EC
chr12-6116375-6116900	9.32052e-82	0.451873	0.064	0.003	1.79167e-76	EC
chr11-128342421-128343279	1.11189e-81	0.488173	0.079	0.007	2.13738e-76	EC
chr20-23258278-23258948	1.80337e-81	0.444538	0.062	0.003	3.46661e-76	EC
chr16-22898825-22899511	2.5109e-81	0.460884	0.066	0.004	4.82667e-76	EC
chr11-9716646-9717101	2.66971e-81	0.458973	0.069	0.004	5.13196e-76	EC
chr3-194867371-194868005	3.1511e-81	0.474957	0.074	0.006	6.05733e-76	EC
chr4-150173352-150174483	6.66947e-81	0.487503	0.082	0.008	1.28206e-75	EC
chr4-11624837-11625665	6.75604e-81	0.47138	0.071	0.005	1.29871e-75	EC
chr4-152243589-152244310	8.59195e-81	0.458558	0.066	0.004	1.65162e-75	EC
chr22-19607309-19607739	1.09107e-80	0.422437	0.056	0.002	2.09735e-75	EC
chr1-40875612-40876090	1.5013e-80	0.4368	0.059	0.003	2.88593e-75	EC
chr11-9688558-9689497	2.54329e-80	0.498197	0.086	0.009	4.88894e-75	EC
chr16-57627998-57628687	2.70069e-80	0.504937	0.094	0.011	5.1915e-75	EC
chr1-79079484-79080209	2.89389e-80	0.452972	0.064	0.004	5.5629e-75	EC
chr13-76512523-76513212	2.94338e-80	0.445304	0.064	0.003	5.65804e-75	EC
chr1-101242277-101242648	3.02856e-80	0.429414	0.056	0.002	5.82177e-75	EC
chr1-20588761-20590040	3.05976e-80	0.504713	0.093	0.011	5.88175e-75	EC
chr2-37657016-37657564	3.77338e-80	0.44504	0.062	0.003	7.25353e-75	EC
chr18-48790042-48790914	4.08858e-80	0.492778	0.087	0.009	7.85943e-75	EC
chr2-176709267-176710246	4.37076e-80	0.496108	0.09	0.009	8.40186e-75	EC
chr6-73713528-73714543	5.22356e-80	0.464037	0.071	0.005	1.00412e-74	EC
chr22-28028925-28029798	5.66242e-80	0.489204	0.089	0.01	1.08848e-74	EC
chr2-181791017-181791882	7.83137e-80	0.458752	0.067	0.004	1.50542e-74	EC
chr1-167654891-167655582	8.74534e-80	0.450385	0.065	0.003	1.68111e-74	EC
chr7-150629240-150629783	8.90713e-80	0.436379	0.059	0.003	1.71221e-74	EC
chr6-166556577-166557337	1.00788e-79	0.495695	0.09	0.01	1.93744e-74	EC
chr15-40928938-40929991	1.12632e-79	0.516561	0.11	0.016	2.1651e-74	EC
chr18-33135601-33136494	1.19452e-79	0.470421	0.073	0.005	2.29621e-74	EC
chr3-64616842-64617422	1.82926e-79	0.445956	0.063	0.003	3.51636e-74	EC
chr9-136539606-136540131	2.21894e-79	0.475535	0.08	0.007	4.26544e-74	EC
chr2-172821238-172821930	2.50091e-79	0.451767	0.065	0.004	4.80748e-74	EC
chr20-32007539-32008267	2.86982e-79	0.447211	0.065	0.004	5.51663e-74	EC
chr21-26546623-26547424	3.00352e-79	0.456497	0.068	0.004	5.77363e-74	EC
chr3-43418269-43419167	3.07235e-79	0.475896	0.078	0.006	5.90596e-74	EC
chr6-170151915-170152847	3.56367e-79	0.494602	0.088	0.01	6.85041e-74	EC
chr2-37855161-37856165	3.63291e-79	0.483292	0.083	0.008	6.98351e-74	EC
chr1-185679065-185679712	4.78156e-79	0.448954	0.064	0.003	9.19155e-74	EC
chr11-128728881-128729573	7.00399e-79	0.44967	0.066	0.004	1.34637e-73	EC
chr2-205139775-205140339	8.80826e-79	0.441543	0.061	0.003	1.6932e-73	EC
chr6-6654631-6655270	9.1434e-79	0.434708	0.058	0.003	1.75763e-73	EC
chr4-24979138-24979903	1.01512e-78	0.466986	0.073	0.006	1.95135e-73	EC
chr1-201597285-201598237	1.20401e-78	0.463156	0.071	0.005	2.31447e-73	EC
chr12-91588878-91589518	1.48736e-78	0.42748	0.058	0.003	2.85914e-73	EC
chr17-6098316-6099034	1.56502e-78	0.439776	0.061	0.003	3.00842e-73	EC
chr6-6008370-6009405	2.08751e-78	0.497396	0.088	0.01	4.0128e-73	EC
chr11-94732474-94733089	2.31443e-78	0.445146	0.062	0.003	4.44901e-73	EC
chr1-59422815-59423680	3.07395e-78	0.488747	0.085	0.009	5.90903e-73	EC
chr11-95682313-95682915	3.25816e-78	0.463343	0.071	0.005	6.26313e-73	EC
chr12-28961748-28962355	4.98821e-78	0.448683	0.064	0.004	9.58879e-73	EC
chr6-165573542-165574106	5.19313e-78	0.471388	0.075	0.006	9.98271e-73	EC
chr4-2412912-2413657	5.21046e-78	0.493864	0.093	0.012	1.0016e-72	EC
chr15-90869537-90870095	5.28733e-78	0.490915	0.091	0.01	1.01638e-72	EC
chr21-38476317-38476764	5.47569e-78	0.45591	0.069	0.005	1.05259e-72	EC
chr9-70438233-70438933	6.08954e-78	0.460717	0.071	0.005	1.17059e-72	EC
chr5-88660418-88661424	7.94569e-78	0.516817	0.108	0.016	1.52739e-72	EC
chr10-21330560-21330964	1.26636e-77	0.444579	0.064	0.004	2.4343e-72	EC
chr19-4647822-4648826	1.38108e-77	0.483738	0.086	0.009	2.65483e-72	EC
chr18-55988468-55988995	2.30615e-77	0.43562	0.059	0.003	4.43309e-72	EC
chr7-150466429-150467097	2.45883e-77	0.429475	0.058	0.003	4.72659e-72	EC
chr3-183210362-183211656	4.35316e-77	0.467919	0.075	0.006	8.36803e-72	EC
chr7-155206231-155206881	4.8073e-77	0.456927	0.068	0.005	9.24102e-72	EC
chr1-30847347-30847823	4.93567e-77	0.448751	0.065	0.004	9.48779e-72	EC
chr2-172836175-172836823	5.22498e-77	0.433169	0.059	0.003	1.00439e-71	EC
chr15-57337783-57338463	5.83028e-77	0.468231	0.075	0.006	1.12075e-71	EC
chr2-32792017-32792900	6.50542e-77	0.446792	0.066	0.005	1.25053e-71	EC
chr20-38811866-38812554	6.81781e-77	0.428208	0.059	0.003	1.31058e-71	EC
chr16-75255104-75255499	7.21595e-77	0.442359	0.064	0.004	1.38711e-71	EC
chr21-33993245-33994341	8.79149e-77	0.476801	0.083	0.008	1.68998e-71	EC
chr7-135166459-135166919	8.99992e-77	0.462074	0.07	0.005	1.73005e-71	EC
chr7-12860967-12861570	9.02746e-77	0.460985	0.071	0.006	1.73534e-71	EC
chr8-13129637-13130155	1.11583e-76	0.448593	0.066	0.004	2.14495e-71	EC
chr17-67549651-67550233	1.32432e-76	0.430286	0.06	0.003	2.54572e-71	EC
chr15-60370105-60370741	1.38082e-76	0.449512	0.066	0.005	2.65434e-71	EC
chr3-69420524-69421384	1.64107e-76	0.459467	0.071	0.005	3.15461e-71	EC
chr3-169117189-169117631	2.75511e-76	0.423635	0.056	0.002	5.29612e-71	EC
chr2-209495273-209496863	3.26544e-76	0.527571	0.143	0.033	6.27712e-71	EC
chr9-117747207-117747942	3.51812e-76	0.421708	0.056	0.003	6.76285e-71	EC
chr22-36463421-36464218	4.96715e-76	0.491454	0.091	0.011	9.5483e-71	EC
chr20-10666835-10667492	5.11215e-76	0.457611	0.071	0.006	9.82703e-71	EC
chr8-6599045-6599643	5.19716e-76	0.442205	0.065	0.004	9.99044e-71	EC
chr1-184152251-184153419	5.99628e-76	0.504018	0.107	0.017	1.15266e-70	EC
chr20-38827676-38828396	6.57933e-76	0.432747	0.063	0.004	1.26474e-70	EC
chr8-10729761-10730794	6.76032e-76	0.480735	0.081	0.008	1.29953e-70	EC
chr7-131623035-131623656	9.94626e-76	0.441672	0.065	0.004	1.91196e-70	EC
chr20-11195771-11196655	1.08199e-75	0.472734	0.08	0.008	2.07991e-70	EC
chr3-15300285-15301077	1.13564e-75	0.476638	0.086	0.009	2.18302e-70	EC
chr16-89315855-89316646	1.46639e-75	0.458884	0.073	0.006	2.81882e-70	EC
chr10-14782558-14783212	1.68569e-75	0.433369	0.06	0.003	3.24039e-70	EC
chr2-20568505-20569433	1.81954e-75	0.486039	0.088	0.01	3.49767e-70	EC
chr18-55387412-55388031	1.97835e-75	0.439891	0.065	0.004	3.80297e-70	EC
chr1-67446830-67447472	2.17419e-75	0.429765	0.058	0.003	4.17943e-70	EC
chr16-75550126-75550863	2.54723e-75	0.445273	0.068	0.005	4.89651e-70	EC
chr16-81866800-81867398	2.54958e-75	0.431744	0.062	0.004	4.90103e-70	EC
chr1-175514187-175515001	2.56969e-75	0.440764	0.064	0.004	4.93969e-70	EC
chr5-58241311-58241794	2.68797e-75	0.417935	0.055	0.003	5.16706e-70	EC
chr1-66349926-66350410	2.74439e-75	0.44264	0.064	0.004	5.27551e-70	EC
chr11-82883656-82884315	3.60122e-75	0.440583	0.065	0.004	6.92259e-70	EC
chr1-7648882-7649637	4.18475e-75	0.45936	0.076	0.007	8.0443e-70	EC
chr2-12665325-12665741	5.20854e-75	0.417572	0.056	0.003	1.00123e-69	EC
chrX-55326762-55327361	6.1285e-75	0.40998	0.052	0.002	1.17808e-69	EC
chr9-122306794-122307367	7.11805e-75	0.414933	0.054	0.002	1.3683e-69	EC
chr11-76578259-76579840	8.57578e-75	0.508917	0.117	0.02	1.64851e-69	EC
chr4-109184144-109184944	9.44215e-75	0.453007	0.069	0.005	1.81505e-69	EC
chr9-6197401-6198834	9.63541e-75	0.470853	0.08	0.008	1.8522e-69	EC
chr12-96078073-96078697	1.16289e-74	0.452462	0.07	0.005	2.2354e-69	EC
chr1-93804313-93804825	1.25737e-74	0.452184	0.069	0.005	2.41703e-69	EC
chr9-132372193-132373074	1.33442e-74	0.452792	0.072	0.006	2.56514e-69	EC
chr13-97241556-97242124	1.41381e-74	0.450206	0.069	0.005	2.71775e-69	EC
chr1-21574008-21575138	2.09175e-74	0.491077	0.102	0.015	4.02094e-69	EC
chr10-80509496-80510092	2.28332e-74	0.442945	0.066	0.005	4.3892e-69	EC
chr3-12120108-12120774	2.56887e-74	0.417349	0.057	0.003	4.93811e-69	EC
chr1-159910198-159910896	2.74467e-74	0.475779	0.085	0.01	5.27605e-69	EC
chr2-158715842-158717107	2.78032e-74	0.484097	0.092	0.011	5.34458e-69	EC
chr17-75679473-75680304	3.51506e-74	0.444115	0.068	0.005	6.75697e-69	EC
chr14-33564515-33565183	3.83744e-74	0.428444	0.061	0.004	7.37667e-69	EC
chr6-56361730-56362104	4.08638e-74	0.419452	0.055	0.003	7.8552e-69	EC
chr13-32264373-32264877	4.33903e-74	0.436772	0.063	0.004	8.34088e-69	EC
chr1-159751397-159752476	5.66468e-74	0.471487	0.08	0.008	1.08892e-68	EC
chr19-53086559-53087316	6.53205e-74	0.432035	0.062	0.004	1.25565e-68	EC
chr8-133729785-133730626	7.49478e-74	0.431714	0.061	0.004	1.44071e-68	EC
chr9-136655725-136656367	8.1527e-74	0.425416	0.061	0.004	1.56718e-68	EC
chr8-119698240-119698690	9.9153e-74	0.407188	0.052	0.002	1.90601e-68	EC
chr6-11649890-11650650	1.11521e-73	0.444311	0.066	0.005	2.14376e-68	EC
chr1-221216925-221217477	1.14825e-73	0.415695	0.054	0.002	2.20727e-68	EC
chr6-125821687-125822262	1.81564e-73	0.453052	0.072	0.006	3.49019e-68	EC
chr7-45210893-45211560	1.81821e-73	0.417403	0.055	0.003	3.49514e-68	EC
chr6-30500528-30501089	1.88824e-73	0.433191	0.063	0.004	3.62974e-68	EC
chr9-131714051-131714782	1.9745e-73	0.493919	0.107	0.018	3.79556e-68	EC
chr10-49188097-49188692	2.22099e-73	0.452276	0.071	0.006	4.26938e-68	EC
chr20-64051436-64051856	2.26871e-73	0.414579	0.056	0.003	4.36113e-68	EC
chr6-2127389-2127895	2.58524e-73	0.430418	0.061	0.003	4.96958e-68	EC
chr2-70891366-70891993	2.59933e-73	0.413402	0.056	0.003	4.99666e-68	EC
chr6-14422926-14423677	3.45898e-73	0.419426	0.058	0.003	6.64916e-68	EC
chr21-39000161-39000888	3.65917e-73	0.442374	0.068	0.005	7.03399e-68	EC
chr12-9163307-9163772	3.67956e-73	0.420483	0.055	0.003	7.07319e-68	EC
chr5-58316870-58317376	3.83404e-73	0.404699	0.052	0.002	7.37014e-68	EC
chr8-54287948-54288680	4.64886e-73	0.440474	0.065	0.005	8.93647e-68	EC
chr11-118274940-118275728	4.71052e-73	0.42059	0.058	0.003	9.05498e-68	EC
chr11-132770623-132771430	5.04909e-73	0.432829	0.061	0.004	9.70581e-68	EC
chr7-155257339-155258036	5.40208e-73	0.44965	0.068	0.005	1.03844e-67	EC
chr20-51393451-51394162	5.83059e-73	0.422957	0.059	0.003	1.12081e-67	EC
chr8-88000613-88001402	6.06763e-73	0.431814	0.061	0.004	1.16637e-67	EC
chr13-107202507-107202991	6.39067e-73	0.40351	0.052	0.002	1.22847e-67	EC
chr4-145501134-145501627	7.21135e-73	0.431748	0.062	0.004	1.38623e-67	EC
chr17-70110284-70110931	8.23745e-73	0.449075	0.071	0.006	1.58348e-67	EC
chr15-68729524-68731251	8.6141e-73	0.500264	0.118	0.022	1.65588e-67	EC
chr5-112367036-112367753	8.76635e-73	0.442913	0.066	0.005	1.68515e-67	EC
chr11-118240985-118241809	8.78225e-73	0.441105	0.066	0.005	1.6882e-67	EC
chr5-116388616-116389201	1.18655e-72	0.421714	0.058	0.003	2.28089e-67	EC
chr6-10523910-10524304	1.24113e-72	0.409282	0.053	0.002	2.38581e-67	EC
chr5-148972676-148973358	1.59457e-72	0.4464	0.067	0.005	3.06523e-67	EC
chr10-110758803-110759268	1.77405e-72	0.402094	0.05	0.002	3.41023e-67	EC
chr13-106495992-106496582	1.84242e-72	0.416917	0.058	0.003	3.54167e-67	EC
chr5-149149750-149150801	2.21619e-72	0.43975	0.067	0.005	4.26017e-67	EC
chr6-5996019-5996486	2.48342e-72	0.436006	0.066	0.005	4.77386e-67	EC
chr19-8342641-8343523	3.02849e-72	0.461381	0.08	0.009	5.82163e-67	EC
chr4-11505205-11505994	3.33522e-72	0.421929	0.059	0.004	6.41126e-67	EC
chr7-104943434-104944048	5.27044e-72	0.465998	0.085	0.011	1.01313e-66	EC
chr9-107587246-107587994	6.45814e-72	0.433525	0.064	0.005	1.24144e-66	EC
chr3-52494885-52495461	7.16414e-72	0.447255	0.071	0.006	1.37716e-66	EC
chr2-67871722-67872359	8.06847e-72	0.424471	0.06	0.004	1.55099e-66	EC
chr5-148825720-148827004	1.14772e-71	0.510664	0.137	0.031	2.20626e-66	EC
chr3-133944885-133945421	1.25035e-71	0.428141	0.063	0.005	2.40353e-66	EC
chr3-119278934-119279660	1.54158e-71	0.46477	0.082	0.009	2.96337e-66	EC
chr3-51686473-51687155	1.55484e-71	0.425598	0.062	0.004	2.98886e-66	EC
chr1-15020961-15021772	1.59851e-71	0.455231	0.077	0.008	3.0728e-66	EC
chr3-196650713-196651570	1.74429e-71	0.478026	0.094	0.013	3.35304e-66	EC
chr13-33015053-33015552	2.1885e-71	0.425108	0.061	0.004	4.20694e-66	EC
chr13-28640691-28641489	2.30039e-71	0.443271	0.071	0.006	4.42202e-66	EC
chr6-13526641-13527126	2.70294e-71	0.418091	0.057	0.003	5.19583e-66	EC
chr20-56418480-56419485	3.22426e-71	0.467957	0.085	0.01	6.19796e-66	EC
chr13-29679259-29679865	3.81348e-71	0.413746	0.057	0.003	7.33062e-66	EC
chr9-38059175-38059831	3.95985e-71	0.410165	0.056	0.003	7.61199e-66	EC
chr16-53518609-53519098	4.04037e-71	0.413087	0.055	0.003	7.76677e-66	EC
chr3-143302513-143303194	4.69463e-71	0.437407	0.065	0.005	9.02444e-66	EC
chr2-201191181-201192086	6.36292e-71	0.446175	0.073	0.007	1.22314e-65	EC
chr12-120677511-120678528	6.53498e-71	0.440395	0.069	0.006	1.25621e-65	EC
chr12-120249811-120250342	7.10102e-71	0.451856	0.074	0.007	1.36502e-65	EC
chr12-91663090-91663634	7.96514e-71	0.424044	0.059	0.004	1.53113e-65	EC
chr2-9106001-9106714	8.13944e-71	0.457352	0.081	0.009	1.56464e-65	EC
chr17-6178525-6179485	8.88976e-71	0.419333	0.058	0.003	1.70887e-65	EC
chr3-11201145-11201933	9.32707e-71	0.442445	0.072	0.006	1.79293e-65	EC
chr13-57629464-57630168	1.16721e-70	0.482171	0.094	0.014	2.24372e-65	EC
chr7-152735363-152736089	1.1887e-70	0.414612	0.059	0.004	2.28502e-65	EC
chr2-150778457-150779219	1.66288e-70	0.434693	0.066	0.005	3.19653e-65	EC
chr2-88828633-88829093	1.70343e-70	0.411454	0.056	0.003	3.27449e-65	EC
chr9-110069632-110070191	1.70889e-70	0.438243	0.069	0.006	3.28499e-65	EC
chr6-32952719-32953455	1.91688e-70	0.479839	0.097	0.016	3.68481e-65	EC
chr3-186971361-186971967	2.34538e-70	0.428741	0.063	0.005	4.5085e-65	EC
chr10-95741746-95742347	2.65103e-70	0.425531	0.063	0.004	5.09604e-65	EC
chr12-10067864-10068279	2.76469e-70	0.407498	0.054	0.003	5.31453e-65	EC
chr1-27789452-27790016	3.16811e-70	0.407428	0.057	0.003	6.09002e-65	EC
chr17-40582079-40582816	3.32097e-70	0.418891	0.062	0.004	6.38387e-65	EC
chr1-221415297-221415971	3.34817e-70	0.41441	0.058	0.004	6.43616e-65	EC
chr12-19744410-19745143	3.66467e-70	0.436651	0.065	0.005	7.04455e-65	EC
chrX-45200774-45201237	3.80083e-70	0.394665	0.05	0.002	7.30629e-65	EC
chr2-112811496-112812294	4.81562e-70	0.427543	0.064	0.005	9.25702e-65	EC
chr3-16050795-16051541	5.8984e-70	0.455302	0.077	0.008	1.13384e-64	EC
chr5-154965975-154966803	7.19215e-70	0.405546	0.055	0.003	1.38254e-64	EC
chr3-64954748-64955409	7.27483e-70	0.432787	0.066	0.005	1.39843e-64	EC
chr21-45318785-45319817	7.31748e-70	0.469028	0.092	0.012	1.40663e-64	EC
chr8-23321355-23321883	7.42188e-70	0.428177	0.064	0.005	1.4267e-64	EC
chr20-1336739-1337298	8.1225e-70	0.457852	0.079	0.009	1.56138e-64	EC
chr12-42021440-42021901	9.80496e-70	0.406662	0.055	0.003	1.8848e-64	EC
chr18-57792491-57793309	9.9933e-70	0.435712	0.068	0.006	1.921e-64	EC
chr4-87502381-87503376	1.07002e-69	0.443529	0.071	0.007	2.05689e-64	EC
chr1-223102829-223103528	1.17656e-69	0.430246	0.066	0.005	2.26168e-64	EC
chr17-67421792-67422572	1.43822e-69	0.437348	0.07	0.006	2.76467e-64	EC
chr16-75288871-75289558	1.49941e-69	0.425794	0.062	0.005	2.8823e-64	EC
chr18-35462880-35463499	1.60527e-69	0.44451	0.073	0.007	3.08579e-64	EC
chr12-92411178-92412036	1.64293e-69	0.437217	0.069	0.006	3.15819e-64	EC
chr20-20752645-20753294	2.01993e-69	0.401506	0.055	0.003	3.8829e-64	EC
chr15-62164890-62165417	2.12291e-69	0.403337	0.052	0.003	4.08086e-64	EC
chr22-38176068-38176622	2.23532e-69	0.450903	0.079	0.009	4.29693e-64	EC
chr8-121822266-121823133	2.24932e-69	0.409824	0.058	0.003	4.32384e-64	EC
chr5-144144782-144145604	2.30335e-69	0.413736	0.055	0.003	4.42771e-64	EC
chr8-127126004-127127096	2.35166e-69	0.47511	0.096	0.014	4.52058e-64	EC
chr6-4350516-4350966	2.85434e-69	0.401769	0.054	0.003	5.48686e-64	EC
chr5-149298655-149299206	3.10831e-69	0.40708	0.057	0.003	5.97507e-64	EC
chr5-138900279-138900980	3.8285e-69	0.413887	0.06	0.004	7.35948e-64	EC
chr6-35044088-35045111	4.27084e-69	0.473481	0.096	0.014	8.2098e-64	EC
chr12-1216730-1217923	4.6907e-69	0.454741	0.082	0.01	9.01689e-64	EC
chr14-61355744-61356425	5.14303e-69	0.411444	0.06	0.004	9.88639e-64	EC
chr7-2387683-2388440	5.35452e-69	0.425493	0.061	0.005	1.02929e-63	EC
chr5-55599454-55599999	5.49193e-69	0.434707	0.066	0.006	1.05571e-63	EC
chr2-120508446-120509428	7.40552e-69	0.433649	0.066	0.006	1.42356e-63	EC
chr4-165222044-165222946	8.38335e-69	0.446527	0.073	0.007	1.61152e-63	EC
chr21-28521832-28522852	8.55961e-69	0.446998	0.075	0.007	1.64541e-63	EC
chr12-105580689-105581268	8.84982e-69	0.396585	0.054	0.003	1.70119e-63	EC
chr7-603804-604852	9.20178e-69	0.449095	0.078	0.009	1.76885e-63	EC
chr14-61418533-61418976	9.61055e-69	0.399817	0.054	0.003	1.84743e-63	EC
chr17-28982081-28982882	1.10839e-68	0.423775	0.064	0.005	2.13065e-63	EC
chr5-142280002-142280739	1.13801e-68	0.43651	0.068	0.006	2.18758e-63	EC
chr10-95729278-95729936	1.96712e-68	0.39268	0.051	0.002	3.78137e-63	EC
chr9-136714350-136715038	2.01466e-68	0.445452	0.076	0.008	3.87276e-63	EC
chr2-42132802-42133381	2.02106e-68	0.460567	0.086	0.011	3.88506e-63	EC
chr8-8806043-8806684	2.04047e-68	0.410613	0.058	0.004	3.92237e-63	EC
chr7-131581080-131582053	2.16818e-68	0.424944	0.063	0.005	4.16787e-63	EC
chr12-91948459-91948881	2.20372e-68	0.406328	0.055	0.003	4.23618e-63	EC
chr5-172156426-172156977	2.31069e-68	0.402318	0.056	0.003	4.44182e-63	EC
chr4-165839649-165840340	2.44777e-68	0.401652	0.054	0.003	4.70533e-63	EC
chr2-86225463-86225907	2.51033e-68	0.411146	0.057	0.004	4.82559e-63	EC
chr13-44242809-44243681	2.75121e-68	0.45526	0.086	0.011	5.28862e-63	EC
chr22-38172652-38173164	4.22133e-68	0.421457	0.064	0.005	8.11462e-63	EC
chr11-3126296-3126852	4.39976e-68	0.432026	0.066	0.006	8.45761e-63	EC
chr8-133437439-133438132	5.36977e-68	0.4351	0.069	0.006	1.03223e-62	EC
chr15-71515188-71516108	6.03624e-68	0.415735	0.064	0.005	1.16034e-62	EC
chr3-127713740-127714517	6.4094e-68	0.420207	0.061	0.005	1.23207e-62	EC
chr22-19576793-19577321	6.71723e-68	0.402588	0.055	0.003	1.29125e-62	EC
chr7-14073374-14073979	8.17008e-68	0.398413	0.054	0.003	1.57053e-62	EC
chr18-51890479-51891285	8.21165e-68	0.423803	0.065	0.006	1.57852e-62	EC
chr2-10550245-10550931	9.14369e-68	0.40667	0.058	0.004	1.75768e-62	EC
chr10-60827760-60828825	1.07674e-67	0.475668	0.101	0.017	2.06981e-62	EC
chr6-138592985-138593672	1.09663e-67	0.466622	0.086	0.012	2.10805e-62	EC
chr17-7021902-7022538	1.36143e-67	0.479546	0.105	0.018	2.61707e-62	EC
chr2-25960730-25961364	1.42007e-67	0.418672	0.061	0.004	2.72978e-62	EC
chr5-149289167-149289773	1.45535e-67	0.416143	0.06	0.004	2.7976e-62	EC
chr3-159762945-159764806	1.56732e-67	0.50307	0.158	0.042	3.01285e-62	EC
chr18-70421998-70422594	1.77629e-67	0.426257	0.065	0.006	3.41455e-62	EC
chr10-129258412-129259504	1.96656e-67	0.407451	0.059	0.004	3.78029e-62	EC
chr4-77100158-77100636	2.07969e-67	0.390947	0.051	0.003	3.99776e-62	EC
chr1-109895786-109896495	2.17448e-67	0.439545	0.072	0.007	4.17999e-62	EC
chr20-35166110-35166781	2.52583e-67	0.430086	0.069	0.007	4.85537e-62	EC
chr3-119646859-119648241	2.59078e-67	0.480158	0.103	0.018	4.98022e-62	EC
chr12-68422878-68423433	3.11933e-67	0.414126	0.06	0.004	5.99626e-62	EC
chr12-31874756-31875604	3.12441e-67	0.449532	0.079	0.009	6.00602e-62	EC
chr10-89224548-89225550	3.71105e-67	0.447464	0.078	0.009	7.13372e-62	EC
chr11-75160275-75160793	4.12032e-67	0.403735	0.057	0.004	7.92046e-62	EC
chr4-11801620-11802305	4.36513e-67	0.402461	0.055	0.003	8.39104e-62	EC
chr1-27631049-27631947	4.7421e-67	0.441318	0.076	0.008	9.1157e-62	EC
chr5-68433954-68434725	5.13546e-67	0.453445	0.083	0.011	9.87185e-62	EC
chr15-31062586-31063259	5.27885e-67	0.396468	0.055	0.003	1.01475e-61	EC
chr6-11389836-11390325	6.1367e-67	0.409209	0.058	0.004	1.17965e-61	EC
chr7-156903332-156903981	6.53221e-67	0.407965	0.059	0.004	1.25568e-61	EC
chr9-4553804-4554309	8.06005e-67	0.391377	0.052	0.003	1.54937e-61	EC
chr17-75686323-75686857	8.22524e-67	0.395093	0.054	0.003	1.58113e-61	EC
chr9-131116644-131117484	8.5836e-67	0.42058	0.064	0.005	1.65002e-61	EC
chr12-105467630-105468619	8.66254e-67	0.427629	0.069	0.007	1.66519e-61	EC
chr4-129545629-129546342	8.92832e-67	0.427843	0.066	0.006	1.71628e-61	EC
chr14-54364664-54365358	9.0303e-67	0.439199	0.073	0.008	1.73589e-61	EC
chr3-50170658-50171117	1.37007e-66	0.412669	0.061	0.004	2.63367e-61	EC
chr3-21705620-21706144	1.53814e-66	0.401	0.053	0.003	2.95675e-61	EC
chr8-103280999-103281471	1.92098e-66	0.398745	0.054	0.003	3.69269e-61	EC
chr17-49259325-49261039	1.95365e-66	0.461052	0.096	0.014	3.75548e-61	EC
chr6-158300093-158300960	2.16089e-66	0.419705	0.064	0.005	4.15386e-61	EC
chr11-87368763-87369365	2.46353e-66	0.407157	0.057	0.004	4.73563e-61	EC
chr5-142874435-142874863	2.4971e-66	0.410606	0.059	0.004	4.80015e-61	EC
chr4-139762589-139763122	3.04576e-66	0.413331	0.06	0.005	5.85483e-61	EC
chr2-159225119-159226367	3.35797e-66	0.435475	0.072	0.007	6.45499e-61	EC
chr12-47753325-47753917	3.57546e-66	0.44137	0.075	0.009	6.87307e-61	EC
chr10-30048883-30049557	3.64029e-66	0.399616	0.055	0.003	6.99768e-61	EC
chr3-169218283-169218728	3.66517e-66	0.39149	0.052	0.003	7.04553e-61	EC
chr2-112626489-112627680	4.04964e-66	0.46774	0.097	0.016	7.78458e-61	EC
chr5-82356939-82357762	4.14447e-66	0.473697	0.099	0.016	7.96687e-61	EC
chr5-142803317-142804005	4.9359e-66	0.412237	0.061	0.005	9.48822e-61	EC
chr8-40164832-40165467	5.2815e-66	0.40045	0.056	0.003	1.01526e-60	EC
chr13-113881164-113882544	5.39601e-66	0.449765	0.083	0.011	1.03727e-60	EC
chr16-19804647-19805399	5.73634e-66	0.418737	0.065	0.006	1.10269e-60	EC
chr5-58268185-58268629	7.5229e-66	0.389271	0.051	0.003	1.44612e-60	EC
chr1-207205029-207205803	7.56536e-66	0.393882	0.054	0.003	1.45428e-60	EC
chr9-16364073-16364723	8.33004e-66	0.407468	0.059	0.004	1.60128e-60	EC
chr22-32354644-32355563	9.16272e-66	0.403634	0.056	0.004	1.76134e-60	EC
chr1-170494266-170494803	1.18154e-65	0.398601	0.053	0.003	2.27127e-60	EC
chr1-232306073-232306885	1.28981e-65	0.448029	0.082	0.011	2.47939e-60	EC
chr1-211527729-211528321	1.41889e-65	0.405009	0.059	0.004	2.72753e-60	EC
chr22-32643961-32644874	1.42374e-65	0.451209	0.085	0.012	2.73684e-60	EC
chr20-3739086-3739843	1.42983e-65	0.43531	0.073	0.008	2.74854e-60	EC
[truncated: 21,633 more rows]

## Sheet: ST4
Supplementary Table 4. Ageing-associated differentially expressed genes (DEGs)
avg_log2FC: the Log2 fold change of average expression in the current cluster against the rest of clusters. pct.1: the percentage of cells which express the marker gene in the current cluster. pct.2: the percentage of cells which express the marker gene in the rest of the clusters. cluster: cluster ID. gene: gene symbol. p_val: P value; p_val_adj: Bonferroni-adjusted p-value.
gene	p_val	avg_log2FC	pct.1	pct.2	p_val_adj	cluster
RARRES1	0	2.81281	0.392	0.038	0	SC
PLCG2	0	1.64434	0.607	0.379	0	SC
TMEM132C	0	1.52129	0.283	0.048	0	SC
FBXO32	0	1.42832	0.393	0.208	0	SC
NAMPT	0	1.32824	0.416	0.234	0	SC
PTGIS	0	1.32754	0.513	0.287	0	SC
GALNT15	0	1.30636	0.256	0.058	0	SC
FOXP2	0	1.29511	0.538	0.257	0	SC
ALPK1	0	1.27913	0.438	0.18	0	SC
BCL6	0	1.2681	0.511	0.234	0	SC
SYNE1	0	1.19451	0.741	0.48	0	SC
PPM1H	0	1.17553	0.427	0.21	0	SC
TMOD1	0	1.17205	0.521	0.294	0	SC
FBLN1	0	1.14363	0.393	0.185	0	SC
CHST11	0	1.13442	0.338	0.175	0	SC
INPP4B	0	1.11778	0.346	0.15	0	SC
ID2	2.6758e-276	1.06029	0.311	0.171	7.309e-272	SC
PHF21A	0	1.05049	0.683	0.45	0	SC
PRR16	3.3342e-257	1.03531	0.268	0.127	9.1074e-253	SC
SLIT2	1.7104e-269	1.01812	0.275	0.131	4.672e-265	SC
BNIP3L	0	1.00208	0.616	0.434	0	SC
MAP3K5	0	0.996851	0.864	0.727	0	SC
RNF24	5.4217e-280	0.947817	0.348	0.203	1.4809e-275	SC
ATP8A1	0	0.931931	0.389	0.183	0	SC
FPGS	0	0.925397	0.319	0.121	0	SC
PRKG1	3.8394e-252	0.920618	0.496	0.367	1.0487e-247	SC
CBLB	0	0.909997	0.694	0.521	0	SC
SGCZ	3.128e-179	0.896747	0.327	0.203	8.5441e-175	SC
C3	1.0531e-300	0.886278	0.397	0.226	2.8765e-296	SC
PRRX1	0	0.883557	0.374	0.158	0	SC
EFEMP1	0	0.868257	0.467	0.236	0	SC
DPYD	0	0.866965	0.711	0.498	0	SC
PLA2G2A	5.5837e-170	0.850211	0.251	0.143	1.5252e-165	SC
FGF7	2.6832e-230	0.846127	0.399	0.247	7.329e-226	SC
HSPA1A	1.2118e-305	0.826001	0.434	0.249	3.3101e-301	SC
NDRG1	0	0.823906	0.459	0.26	0	SC
ABCA8	0	0.819191	0.587	0.398	0	SC
FYN	1.9132e-303	0.81694	0.492	0.318	5.226e-299	SC
BNIP3	9.8679e-205	0.80165	0.328	0.204	2.6954e-200	SC
LPAR1	8.3775e-225	0.782935	0.29	0.16	2.2883e-220	SC
ABCA6	0	0.770079	0.579	0.383	0	SC
GBE1	9.6917e-101	0.767446	0.427	0.342	2.64728e-96	SC
BOC	0	0.760831	0.36	0.179	0	SC
RORA	0	0.758133	0.813	0.689	0	SC
CACNB2	0	0.757026	0.678	0.561	0	SC
NPAS3	9.6891e-233	0.75315	0.412	0.259	2.6466e-228	SC
NEGR1	2.6191e-151	0.752261	0.383	0.411	7.154e-147	SC
TRANK1	3.9798e-303	0.749551	0.268	0.115	1.0871e-298	SC
MOB3B	8.6338e-300	0.744885	0.614	0.436	2.3583e-295	SC
STEAP2	1.4344e-260	0.739034	0.307	0.159	3.9181e-256	SC
SLIT3	4.909e-152	0.734114	0.381	0.288	1.3409e-147	SC
GNG4	6.2023e-174	0.730664	0.261	0.147	1.6941e-169	SC
L3MBTL4	2.3656e-306	0.723865	0.419	0.236	6.4616e-302	SC
KLHL24	0	0.719555	0.475	0.265	0	SC
NFIB	1.5292e-252	0.719296	0.557	0.403	4.1771e-248	SC
SLC24A3	6.0675e-253	0.706948	0.529	0.37	1.6573e-248	SC
ZNF292	0	0.688516	0.644	0.455	0	SC
ARID5B	7.9724e-217	0.687001	0.583	0.448	2.1777e-212	SC
PID1	4.439e-152	0.685412	0.486	0.364	1.2125e-147	SC
EPHA6	8.4492e-187	0.685044	0.376	0.239	2.3079e-182	SC
AC016831.7	0	0.669781	0.895	0.773	0	SC
LRMDA	7.9882e-194	0.660001	0.479	0.421	2.182e-189	SC
PRELID2	9.8275e-176	0.658042	0.422	0.279	2.6844e-171	SC
ARHGAP24	6.378e-136	0.655899	0.27	0.174	1.7422e-131	SC
RUNX1T1	1.117e-161	0.650927	0.284	0.168	3.0512e-157	SC
LPIN1	5.2616e-217	0.645683	0.42	0.262	1.4372e-212	SC
PRKRIP1	4.0195e-196	0.644259	0.35	0.213	1.0979e-191	SC
ABCA9	1.9458e-183	0.642573	0.458	0.313	5.3149e-179	SC
ELF2	1.0381e-279	0.637619	0.57	0.395	2.8355e-275	SC
USP53	1.2254e-165	0.631483	0.333	0.205	3.3471e-161	SC
SLC25A37	5.6657e-179	0.622677	0.447	0.309	1.5476e-174	SC
TRHDE	1.232e-172	0.620361	0.383	0.251	3.3651e-168	SC
HERPUD1	6.3423e-169	0.619093	0.279	0.157	1.7324e-164	SC
RNF217	2.5822e-283	0.618082	0.483	0.297	7.0534e-279	SC
FAM13A	9.7417e-210	0.61584	0.558	0.405	2.6609e-205	SC
GHR	1.9887e-102	0.615722	0.303	0.231	5.43225e-98	SC
CRADD	2.451e-142	0.604546	0.358	0.253	6.6949e-138	SC
FBN1	2.0467e-192	0.600377	0.559	0.428	5.5906e-188	SC
TSHZ2	5.1522e-284	0.595905	0.791	0.664	1.4073e-279	SC
LAMA2	0	0.595126	0.895	0.784	0	SC
RICTOR	1.5516e-289	0.5907	0.469	0.281	4.2383e-285	SC
SNX9	6.4385e-190	0.589767	0.477	0.331	1.7587e-185	SC
DENND4A	1.0817e-259	0.589588	0.641	0.48	2.9547e-255	SC
TBC1D2B	6.7456e-244	0.588907	0.421	0.253	1.8426e-239	SC
RASSF8	3.3839e-191	0.588711	0.43	0.285	9.2433e-187	SC
DYNC2H1	5.8046e-225	0.582866	0.51	0.351	1.5855e-220	SC
FCHO2	7.3797e-271	0.582702	0.419	0.242	2.0158e-266	SC
BCL2	3.1044e-140	0.577624	0.507	0.394	8.4796e-136	SC
ROBO1	1.68094e-93	0.569839	0.413	0.316	4.5915e-89	SC
CHPT1	3.782e-264	0.569426	0.267	0.119	1.0331e-259	SC
RUFY3	4.4636e-258	0.568935	0.587	0.413	1.2192e-253	SC
EFCAB2	1.3807e-132	0.567366	0.291	0.185	3.7714e-128	SC
REV3L	1.3547e-107	0.565476	0.51	0.421	3.7004e-103	SC
EGLN1	7.8369e-165	0.561358	0.3	0.178	2.1406e-160	SC
ESR1	6.47779e-78	0.559568	0.365	0.286	1.76941e-73	SC
MAP3K20	3.194e-248	0.558557	0.588	0.414	8.7244e-244	SC
ANAPC16	9.3439e-234	0.555617	0.54	0.37	2.5523e-229	SC
AGAP1	6.6657e-120	0.554432	0.517	0.407	1.8207e-115	SC
STAT5B	5.4338e-166	0.552408	0.503	0.368	1.4842e-161	SC
ECHDC2	1.08147622074064e-310	0.546061	0.624	0.424	2.9541e-306	SC
SMG6	2.6342e-168	0.545466	0.504	0.37	7.1954e-164	SC
IFI16	3.8451e-212	0.544577	0.382	0.228	1.0503e-207	SC
ARHGEF3	7.614e-107	0.543701	0.377	0.281	2.0798e-102	SC
DENND4C	1.4117e-215	0.542717	0.48	0.32	3.8561e-211	SC
MEIS1	6.7663e-169	0.54074	0.579	0.465	1.8482e-164	SC
SERPING1	4.1392e-224	0.540674	0.409	0.247	1.1306e-219	SC
N4BP2L1	1.2618e-235	0.540341	0.292	0.145	3.4467e-231	SC
SUGCT	5.8769e-112	0.539499	0.269	0.175	1.6053e-107	SC
ECE1	9.035e-253	0.537969	0.497	0.317	2.4679e-248	SC
FGD4	1.1003e-187	0.53436	0.542	0.389	3.0054e-183	SC
ANKRD28	2.054e-153	0.534346	0.54	0.407	5.6105e-149	SC
SSBP2	1.5281e-297	0.532181	0.747	0.596	4.1741e-293	SC
AC097376.2	6.4211e-122	0.53079	0.258	0.162	1.7539e-117	SC
ULK4	1.37635e-60	0.529555	0.267	0.205	3.75949e-56	SC
IMMP2L	1.0416e-218	0.528958	0.776	0.687	2.8452e-214	SC
FBXL20	1.2933e-217	0.52836	0.457	0.294	3.5327e-213	SC
AUH	2.7823e-236	0.527311	0.51	0.337	7.5999e-232	SC
MEIS2	6.6448e-195	0.525159	0.615	0.477	1.815e-190	SC
SETBP1	6.0222e-186	0.524657	0.632	0.491	1.645e-181	SC
TNRC6B	2.244e-269	0.524312	0.716	0.558	6.1294e-265	SC
DEPP1	4.493e-160	0.524172	0.269	0.15	1.2273e-155	SC
ELMO1	8.6709e-132	0.522208	0.312	0.199	2.3685e-127	SC
FOCAD	2.0552e-148	0.522181	0.332	0.212	5.6137e-144	SC
CFH	1.6032e-104	0.521607	0.573	0.549	4.3791e-100	SC
FOXN3	2.7949e-279	0.517875	0.778	0.638	7.6343e-275	SC
AOX1	2.8789e-233	0.517488	0.254	0.117	7.8638e-229	SC
EGFR	1.2258e-104	0.510694	0.444	0.34	3.3482e-100	SC
KDM3A	2.4971e-178	0.510258	0.283	0.156	6.8208e-174	SC
PI4KA	2.7051e-181	0.509207	0.401	0.257	7.3889e-177	SC
TMTC2	9.84051e-95	0.508543	0.263	0.176	2.68794e-90	SC
YEATS2	3.3682e-114	0.505699	0.273	0.179	9.2003e-110	SC
CUX1	2.2325e-235	0.505149	0.786	0.638	6.0982e-231	SC
SLC2A13	1.0773e-116	0.504656	0.251	0.152	2.9428e-112	SC
NHS	9.0233e-148	0.502081	0.325	0.202	2.4647e-143	SC
JAZF1	1.402e-147	0.501501	0.408	0.281	3.8297e-143	SC
AC139887.2	8.3175e-176	0.501112	0.319	0.186	2.2719e-171	SC
NPEPPS	1.0672e-244	0.501108	0.624	0.449	2.9152e-240	SC
MYO1E	2.00619e-73	0.49144	0.293	0.235	5.47991e-69	SC
NBEA	1.0134e-188	0.489991	0.553	0.407	2.7681e-184	SC
TAF15	6.2385e-170	0.489902	0.482	0.338	1.7041e-165	SC
PTPN13	2.307e-151	0.488743	0.509	0.379	6.3016e-147	SC
TRAF3IP2-AS1	8.598e-113	0.488176	0.335	0.233	2.3485e-108	SC
CFLAR	3.0684e-183	0.487631	0.347	0.208	8.3814e-179	SC
SLC25A12	3.4483e-138	0.487561	0.347	0.227	9.4189e-134	SC
CCND3	3.1475e-121	0.487172	0.311	0.201	8.5974e-117	SC
RAB1A	1.0204e-127	0.486709	0.536	0.422	2.7873e-123	SC
STAG1	8.8732e-268	0.485333	0.805	0.677	2.4237e-263	SC
PRKAG2	1.8964e-154	0.484909	0.331	0.204	5.1801e-150	SC
UBE4B	2.2555e-185	0.483895	0.458	0.307	6.1609e-181	SC
DENND2A	3.7928e-129	0.483189	0.39	0.269	1.036e-124	SC
HELZ	3.6609e-217	0.482851	0.596	0.432	9.9997e-213	SC
TBC1D22A	1.0585e-152	0.482466	0.381	0.251	2.8914e-148	SC
C9orf72	1.1847e-120	0.48224	0.277	0.173	3.236e-116	SC
ABI3BP	1.2116e-104	0.479216	0.381	0.275	3.3095e-100	SC
PLXDC2	2.11292e-52	0.478311	0.488	0.465	5.77145e-48	SC
DCLK1	4.70698e-79	0.47352	0.291	0.206	1.28571e-74	SC
PDK1	6.9861e-105	0.472514	0.271	0.175	1.9082e-100	SC
MAN2A1	3.3069e-135	0.471774	0.337	0.218	9.0328e-131	SC
CREBRF	1.0568e-231	0.471362	0.438	0.269	2.8867e-227	SC
FAM193B	1.2066e-207	0.469399	0.305	0.164	3.2958e-203	SC
TPCN1	5.7527e-182	0.468828	0.284	0.155	1.5714e-177	SC
FAM214A	2.0832e-187	0.468435	0.383	0.236	5.6904e-183	SC
PTPRD	5.4359e-148	0.467494	0.466	0.333	1.4848e-143	SC
UTRN	2.0376e-175	0.465963	0.649	0.524	5.5658e-171	SC
TNRC6A	2.2696e-184	0.465324	0.645	0.508	6.1993e-180	SC
SPATA6	1.0192e-154	0.464171	0.473	0.339	2.7839e-150	SC
RANBP9	2.1227e-150	0.463681	0.472	0.338	5.7981e-146	SC
TNXB	1.3633e-124	0.460992	0.343	0.229	3.7238e-120	SC
BTAF1	1.16044e-96	0.459349	0.372	0.272	3.16973e-92	SC
ROR1	9.89363e-86	0.458888	0.258	0.173	2.70245e-81	SC
PKD2	3.5523e-152	0.45843	0.466	0.33	9.7032e-148	SC
TET2	1.1462e-130	0.458234	0.313	0.199	3.1308e-126	SC
MXI1	5.568e-141	0.456285	0.422	0.291	1.5209e-136	SC
ABCA10	3.33482e-92	0.45587	0.543	0.45	9.10906e-88	SC
KANSL1	2.045e-280	0.454982	0.758	0.595	5.5858e-276	SC
RBPJ	1.3851e-143	0.454427	0.456	0.322	3.7833e-139	SC
TBC1D4	1.9196e-114	0.453654	0.482	0.37	5.2434e-110	SC
MAST4	3.1579e-127	0.452986	0.587	0.505	8.6257e-123	SC
LDB2	9.67071e-94	0.452935	0.318	0.222	2.64155e-89	SC
NCOA1	4.9453e-188	0.449148	0.723	0.61	1.3508e-183	SC
C1RL	1.3057e-154	0.448111	0.35	0.221	3.5664e-150	SC
ZCCHC24	8.6644e-232	0.446628	0.275	0.134	2.3667e-227	SC
BBS9	1.1559e-131	0.444199	0.413	0.29	3.1574e-127	SC
UMAD1	4.1441e-105	0.43996	0.356	0.252	1.132e-100	SC
RBM5	6.4069e-177	0.439142	0.42	0.274	1.75e-172	SC
HIBADH	1.9863e-110	0.438423	0.357	0.248	5.4256e-106	SC
MYO1D	1.5811e-101	0.436349	0.394	0.289	4.3188e-97	SC
KCTD3	4.3066e-174	0.43621	0.276	0.151	1.1764e-169	SC
ALDH1A1	2.1368e-163	0.436196	0.254	0.137	5.8368e-159	SC
WBP1L	4.1641e-137	0.434024	0.271	0.16	1.1374e-132	SC
RLF	3.19366e-89	0.433112	0.408	0.316	8.72349e-85	SC
NT5C2	3.8928e-147	0.432997	0.437	0.303	1.0633e-142	SC
USP37	1.3749e-103	0.432761	0.325	0.221	3.7556e-99	SC
TRA2A	1.3372e-197	0.432638	0.605	0.445	3.6526e-193	SC
OGA	1.0047e-204	0.432543	0.53	0.365	2.7444e-200	SC
RPRD2	1.3361e-122	0.432257	0.424	0.303	3.6495e-118	SC
GULP1	1.0533e-125	0.432151	0.454	0.332	2.877e-121	SC
PLA2R1	8.7597e-147	0.430284	0.423	0.29	2.3927e-142	SC
DLEU2	4.7721e-86	0.430118	0.267	0.183	1.3035e-81	SC
SLC9A9	1.56001e-88	0.429878	0.394	0.301	4.26116e-84	SC
TBL1X	8.88521e-91	0.429868	0.372	0.272	2.42699e-86	SC
DDX17	4.1642e-244	0.427941	0.761	0.631	1.1375e-239	SC
VWA8	1.8234e-114	0.426692	0.326	0.218	4.9807e-110	SC
AKAP13	1.5232e-122	0.426335	0.694	0.59	4.1607e-118	SC
STAT3	2.32862e-88	0.426261	0.657	0.56	6.36062e-84	SC
RPL34	5.09074e-18	0.426018	0.343	0.325	1.39053e-13	SC
POGZ	6.3047e-166	0.425627	0.546	0.4	1.7221e-161	SC
ACSS3	1.3e-110	0.424668	0.431	0.319	3.5511e-106	SC
STXBP1	2.9472e-149	0.424521	0.321	0.197	8.0502e-145	SC
SNCAIP	4.66407e-61	0.422802	0.293	0.221	1.27399e-56	SC
ITSN2	3.8759e-141	0.421735	0.48	0.347	1.0587e-136	SC
DTWD1	9.95e-143	0.421617	0.371	0.244	2.7178e-138	SC
PDE8A	1.1585e-114	0.420534	0.444	0.33	3.1644e-110	SC
KCNT2	5.5953e-105	0.419101	0.622	0.587	1.5284e-100	SC
ANKRD36	3.681e-169	0.419007	0.341	0.206	1.0055e-164	SC
ZSWIM5	4.11214e-74	0.418881	0.352	0.27	1.12323e-69	SC
RHOQ	4.4529e-123	0.418797	0.307	0.197	1.2163e-118	SC
LRP1	2.8128e-172	0.418703	0.474	0.325	7.6833e-168	SC
IRS2	6.4207e-157	0.417148	0.343	0.213	1.7538e-152	SC
NSMCE2	1.20843e-95	0.415478	0.452	0.353	3.30083e-91	SC
CDK19	1.19512e-85	0.415114	0.351	0.258	3.26448e-81	SC
TBC1D15	7.0157e-140	0.414417	0.39	0.262	1.9163e-135	SC
KIF13A	4.90847e-97	0.414019	0.431	0.326	1.34075e-92	SC
CLSTN2	1.41942e-96	0.413395	0.565	0.467	3.87714e-92	SC
NR3C2	7.7864e-133	0.412541	0.387	0.262	2.1269e-128	SC
MEG3	6.941e-247	0.412094	0.579	0.396	1.8959e-242	SC
MLLT6	2.4498e-173	0.410899	0.338	0.203	6.6917e-169	SC
WDPCP	1.0763e-91	0.410475	0.342	0.247	2.93991e-87	SC
OSMR-AS1	1.264e-122	0.409824	0.331	0.217	3.4525e-118	SC
NNMT	3.31541e-67	0.409641	0.251	0.183	9.05604e-63	SC
OSMR	5.0854e-101	0.408734	0.328	0.227	1.38908e-96	SC
UNK	5.1229e-124	0.407523	0.266	0.16	1.3993e-119	SC
LINC02256	1.22896e-95	0.407491	0.317	0.218	3.35691e-91	SC
SAMD8	2.1327e-131	0.406185	0.303	0.188	5.8255e-127	SC
XYLT1	3.6929e-65	0.405764	0.295	0.218	1.00871e-60	SC
ARNT	3.485e-124	0.404887	0.374	0.255	9.5194e-120	SC
ATF7IP	1.0157e-155	0.403785	0.445	0.304	2.7743e-151	SC
TJP1	8.07751e-68	0.403398	0.372	0.292	2.20637e-63	SC
SOS1	1.4447e-133	0.402426	0.679	0.561	3.9462e-129	SC
TTC37	2.1131e-115	0.401524	0.366	0.253	5.772e-111	SC
KIAA1328	1.9017e-118	0.401491	0.494	0.374	5.1945e-114	SC
USP32	1.51721e-93	0.400395	0.422	0.318	4.14426e-89	SC
XIST	4.0809e-189	0.399941	0.819	0.726	1.1147e-184	SC
SLC40A1	9.6586e-152	0.39918	0.424	0.288	2.6382e-147	SC
TFDP2	7.6047e-99	0.397943	0.532	0.424	2.07721e-94	SC
EMSY	9.5723e-134	0.39677	0.374	0.25	2.6147e-129	SC
CDKAL1	7.1475e-134	0.392798	0.635	0.518	1.9524e-129	SC
SFMBT2	2.21806e-89	0.391673	0.457	0.353	6.05864e-85	SC
PHYKPL	4.0433e-122	0.391548	0.333	0.219	1.1044e-117	SC
MAGI2	3.16278e-66	0.391143	0.577	0.527	8.63913e-62	SC
TRPM7	1.6889e-134	0.390586	0.502	0.37	4.6133e-130	SC
DOCK7	8.6077e-115	0.390455	0.407	0.289	2.3512e-110	SC
ENOSF1	5.7795e-114	0.390172	0.305	0.198	1.5787e-109	SC
CARMIL1	1.67183e-96	0.389792	0.448	0.34	4.5666e-92	SC
PLEKHH2	2.56097e-80	0.389432	0.446	0.349	6.99529e-76	SC
RAB6A	1.01087e-77	0.388577	0.36	0.268	2.7612e-73	SC
PFKFB3	1.63342e-66	0.388532	0.255	0.18	4.46168e-62	SC
ARHGEF28	1.2745e-111	0.388112	0.438	0.322	3.4814e-107	SC
UGP2	1.9833e-106	0.387853	0.261	0.164	5.4175e-102	SC
RBMS1	1.0024e-184	0.38706	0.703	0.56	2.7379e-180	SC
RIN2	7.19481e-60	0.386215	0.338	0.262	1.96526e-55	SC
TTBK2	2.5469e-113	0.385556	0.328	0.219	6.9569e-109	SC
LAMC1	3.6558e-38	0.385326	0.319	0.27	9.98582e-34	SC
SOX5	4.2495e-135	0.385141	0.8	0.733	1.1608e-130	SC
TCF7L2	4.5857e-105	0.383893	0.673	0.569	1.2526e-100	SC
SLC16A1-AS1	4.70775e-78	0.383513	0.292	0.206	1.28592e-73	SC
AKT3	6.237e-219	0.383339	0.854	0.77	1.7036e-214	SC
FAM85B	2.4272e-118	0.381698	0.395	0.277	6.6298e-114	SC
CDC27	5.84838e-94	0.381641	0.384	0.281	1.59748e-89	SC
CYBRD1	1.6212e-153	0.381399	0.361	0.23	4.4282e-149	SC
ZNF609	5.2822e-123	0.381398	0.607	0.486	1.4428e-118	SC
RPS6KA5	2.4236e-112	0.381254	0.278	0.175	6.62e-108	SC
SPIDR	1.87775e-82	0.38113	0.604	0.512	5.12908e-78	SC
SPOPL	2.7672e-137	0.380939	0.267	0.156	7.5586e-133	SC
C1orf21	1.4368e-144	0.380782	0.557	0.419	3.9247e-140	SC
ZEB1	1.85275e-76	0.380695	0.419	0.328	5.06079e-72	SC
FBXO42	9.93627e-40	0.380616	0.457	0.398	2.71409e-35	SC
FARS2	1.56079e-75	0.378779	0.348	0.26	4.26329e-71	SC
KIZ	7.9654e-131	0.376586	0.419	0.292	2.1757e-126	SC
PATJ	5.90476e-93	0.376062	0.365	0.262	1.61288e-88	SC
USP15	1.7119e-127	0.374874	0.624	0.502	4.676e-123	SC
ADAMTS9-AS2	6.764e-163	0.373953	0.867	0.824	1.8476e-158	SC
STK3	9.5354e-140	0.373603	0.745	0.645	2.6046e-135	SC
RNF149	1.1435e-130	0.373366	0.38	0.257	3.1234e-126	SC
AKAP10	2.9584e-108	0.372445	0.325	0.218	8.0809e-104	SC
LRCH1	8.2037e-108	0.371754	0.31	0.204	2.2408e-103	SC
KIDINS220	6.3161e-149	0.370453	0.524	0.383	1.7252e-144	SC
ZBTB16	5.5186e-106	0.370015	0.775	0.668	1.5074e-101	SC
POM121	3.13932e-90	0.368559	0.263	0.173	8.57505e-86	SC
GALNT17	2.2011e-62	0.368227	0.492	0.437	6.0123e-58	SC
IGF1R	1.2937e-162	0.366571	0.75	0.631	3.5337e-158	SC
PPFIA1	2.1621e-75	0.366504	0.348	0.259	5.90576e-71	SC
CAMK2D	8.0443e-112	0.366426	0.577	0.458	2.1973e-107	SC
TBC1D19	7.3877e-114	0.365911	0.285	0.181	2.0179e-109	SC
PAN3	5.563e-102	0.365577	0.563	0.455	1.51953e-97	SC
H6PD	7.6491e-121	0.365252	0.255	0.152	2.0894e-116	SC
HACE1	3.5147e-111	0.365152	0.291	0.186	9.6003e-107	SC
DARS	7.75267e-80	0.363095	0.289	0.201	2.11764e-75	SC
SENP6	1.0045e-135	0.362828	0.647	0.523	2.7439e-131	SC
NR3C1	8.13034e-95	0.362529	0.257	0.165	2.2208e-90	SC
ADD3	3.57088e-97	0.362525	0.384	0.277	9.75387e-93	SC
KAZN	3.94e-105	0.362313	0.551	0.51	1.0762e-100	SC
WASHC4	8.1922e-148	0.361801	0.363	0.234	2.2377e-143	SC
PIK3C3	2.3619e-121	0.361604	0.325	0.212	6.4516e-117	SC
BACH2	1.4167e-110	0.360598	0.471	0.352	3.8698e-106	SC
CCNY	4.22652e-85	0.360227	0.535	0.44	1.15447e-80	SC
HBP1	7.9247e-139	0.359992	0.375	0.248	2.1646e-134	SC
SLMAP	8.92157e-83	0.359866	0.482	0.385	2.43693e-78	SC
KAT6B	2.07517e-97	0.359235	0.485	0.376	5.66832e-93	SC
ASXL1	5.32765e-93	0.358834	0.504	0.395	1.45525e-88	SC
BABAM2	9.26558e-92	0.355709	0.519	0.413	2.53089e-87	SC
PLCL2	2.52462e-79	0.355429	0.348	0.255	6.896e-75	SC
KMT2E	2.8748e-151	0.35516	0.681	0.545	7.8526e-147	SC
HIPK3	3.529e-109	0.354903	0.531	0.412	9.6395e-105	SC
MBTD1	2.1238e-128	0.354249	0.397	0.272	5.8012e-124	SC
OSBPL8	3.02297e-67	0.352456	0.359	0.273	8.25725e-63	SC
CBFA2T2	2.35867e-96	0.352397	0.434	0.324	6.4427e-92	SC
KDM4B	9.64879e-76	0.351031	0.436	0.339	2.63557e-71	SC
MKLN1	6.5672e-139	0.350775	0.713	0.599	1.7938e-134	SC
RASGRF2	1.19116e-58	0.350444	0.29	0.217	3.25366e-54	SC
UBE2E1	1.16973e-76	0.349846	0.349	0.258	3.19513e-72	SC
ABL2	4.304e-100	0.349763	0.291	0.191	1.17565e-95	SC
USP33	7.95e-119	0.349743	0.403	0.283	2.1715e-114	SC
INSR	1.0671e-152	0.349516	0.85	0.745	2.9148e-148	SC
VPS13C	2.7442e-118	0.34803	0.466	0.343	7.4959e-114	SC
GPBP1L1	3.2717e-95	0.347967	0.339	0.237	8.93665e-91	SC
TTLL5	2.35429e-82	0.347657	0.261	0.175	6.43073e-78	SC
AVL9	4.63968e-91	0.347168	0.33	0.231	1.26733e-86	SC
PCSK5	2.05668e-94	0.346265	0.588	0.478	5.61783e-90	SC
ZHX2	7.7162e-113	0.345124	0.534	0.412	2.1077e-108	SC
PAM	1.69784e-46	0.345117	0.494	0.429	4.63764e-42	SC
WDR19	7.4144e-108	0.344817	0.252	0.155	2.0252e-103	SC
RREB1	1.01462e-96	0.344468	0.36	0.255	2.77145e-92	SC
GABARAPL1	7.62924e-91	0.344414	0.267	0.175	2.08393e-86	SC
MON2	2.1101e-107	0.34427	0.567	0.453	5.7637e-103	SC
PARD3	2.7265e-211	0.344008	0.889	0.824	7.4474e-207	SC
TULP3	1.685e-112	0.343828	0.351	0.239	4.6025e-108	SC
TOM1L2	2.0669e-103	0.342453	0.361	0.252	5.6456e-99	SC
WDR59	6.3335e-102	0.341895	0.31	0.207	1.72999e-97	SC
PTPRS	9.11829e-85	0.34166	0.319	0.224	2.49066e-80	SC
RSRP1	8.13052e-81	0.340899	0.367	0.27	2.22085e-76	SC
USP24	9.9687e-113	0.340873	0.419	0.301	2.7229e-108	SC
DCN	3.25977e-71	0.340566	0.775	0.728	8.90406e-67	SC
DIAPH2	6.81812e-95	0.340545	0.66	0.571	1.86237e-90	SC
KDM4C	5.4764e-103	0.339742	0.471	0.356	1.49589e-98	SC
WWOX	6.58247e-39	0.339516	0.537	0.504	1.798e-34	SC
KDM2A	2.5337e-101	0.33831	0.548	0.433	6.92083e-97	SC
XRN1	4.7687e-104	0.337013	0.476	0.359	1.3026e-99	SC
MPDZ	5.7954e-148	0.335853	0.553	0.412	1.583e-143	SC
WSB1	8.57914e-83	0.333932	0.58	0.474	2.34339e-78	SC
CLIP4	2.3351e-109	0.333783	0.386	0.272	6.3782e-105	SC
KLF12	7.90788e-65	0.333549	0.317	0.234	2.16004e-60	SC
ASCC3	2.74897e-96	0.332888	0.414	0.304	7.5088e-92	SC
SYTL4	1.7515e-91	0.332773	0.551	0.447	4.78422e-87	SC
POU2F1	2.72593e-84	0.332713	0.444	0.341	7.44587e-80	SC
NUMB	3.6841e-103	0.330883	0.476	0.36	1.00632e-98	SC
GPCPD1	1.24051e-54	0.330867	0.289	0.217	3.38846e-50	SC
FTO	5.5296e-100	0.330671	0.621	0.519	1.51041e-95	SC
SMAD3	3.96849e-38	0.330519	0.394	0.327	1.08399e-33	SC
TSPAN9	1.09249e-77	0.328411	0.326	0.234	2.98413e-73	SC
EXOC4	1.43362e-94	0.326869	0.655	0.563	3.91592e-90	SC
FHIT	6.13906e-32	0.326796	0.404	0.354	1.67688e-27	SC
PPP3CC	3.20402e-78	0.326709	0.285	0.198	8.75179e-74	SC
ZDHHC17	3.6919e-109	0.326178	0.352	0.241	1.0084e-104	SC
KIAA1958	4.51631e-63	0.326053	0.506	0.42	1.23363e-58	SC
SIPA1L3	2.08863e-67	0.325777	0.277	0.196	5.70509e-63	SC
PDSS2	1.80196e-73	0.325586	0.365	0.273	4.92205e-69	SC
TANK	5.83187e-80	0.325555	0.392	0.294	1.59298e-75	SC
WDFY3	6.3979e-102	0.324565	0.584	0.473	1.7476e-97	SC
GXYLT2	2.09669e-86	0.324457	0.31	0.215	5.72712e-82	SC
TAF3	1.32568e-62	0.324334	0.338	0.255	3.62111e-58	SC
ATG7	4.90885e-55	0.324239	0.396	0.323	1.34085e-50	SC
JAK1	4.77906e-96	0.324094	0.446	0.335	1.3054e-91	SC
GALK2	1.9081e-101	0.32365	0.281	0.183	5.21208e-97	SC
VGLL4	2.46413e-94	0.323576	0.49	0.379	6.73076e-90	SC
TNS1	1.48375e-85	0.323136	0.482	0.377	4.05287e-81	SC
SNX1	3.14375e-83	0.322876	0.308	0.215	8.58715e-79	SC
GPATCH8	6.38932e-84	0.322132	0.579	0.482	1.74524e-79	SC
SNX13	9.7923e-109	0.321862	0.423	0.306	2.6748e-104	SC
CLASP1	2.2117e-141	0.321831	0.646	0.512	6.0411e-137	SC
DNAJC13	1.10028e-92	0.321517	0.267	0.174	3.00541e-88	SC
RBPMS	5.21481e-57	0.321355	0.73	0.663	1.42443e-52	SC
WASHC1	1.19868e-84	0.321157	0.297	0.205	3.27419e-80	SC
GGA2	7.14879e-98	0.320871	0.278	0.181	1.95269e-93	SC
ZCCHC14	1.11492e-82	0.320819	0.292	0.201	3.04541e-78	SC
NR2F2-AS1	7.20266e-74	0.320669	0.726	0.67	1.96741e-69	SC
NCOA2	5.5627e-99	0.320209	0.616	0.507	1.51945e-94	SC
MIR29B2CHG	1.459e-131	0.319071	0.27	0.162	3.9853e-127	SC
LCOR	5.25794e-77	0.319053	0.478	0.381	1.43621e-72	SC
PCNX1	1.4608e-104	0.317997	0.565	0.449	3.9901e-100	SC
RHOT1	1.06451e-88	0.317642	0.3	0.205	2.90771e-84	SC
STAT6	4.73674e-97	0.317301	0.269	0.174	1.29384e-92	SC
ATP6V1C1	7.36015e-91	0.316725	0.252	0.162	2.01042e-86	SC
MBD2	2.79877e-84	0.316533	0.266	0.178	7.64484e-80	SC
HIF1A	3.10436e-38	0.31644	0.412	0.351	8.47956e-34	SC
ARHGEF7	2.0231e-103	0.31579	0.429	0.314	5.5261e-99	SC
TCF7L1	1.82708e-49	0.315179	0.407	0.332	4.99066e-45	SC
CASC4	4.19425e-64	0.315014	0.379	0.292	1.14566e-59	SC
BMPR2	2.91127e-78	0.314567	0.469	0.368	7.95213e-74	SC
ANKRD12	2.71249e-86	0.314427	0.616	0.515	7.40918e-82	SC
PTBP3	1.2145e-113	0.314314	0.304	0.197	3.3173e-109	SC
THADA	9.74698e-86	0.314297	0.436	0.332	2.66239e-81	SC
MAP3K4	4.1277e-121	0.313973	0.34	0.226	1.1275e-116	SC
MLXIP	6.8357e-106	0.313039	0.315	0.21	1.8672e-101	SC
ST5	4.64988e-65	0.312663	0.328	0.244	1.27011e-60	SC
SGCD	7.56858e-31	0.311899	0.256	0.246	2.06736e-26	SC
C2CD5	1.42525e-85	0.311568	0.312	0.217	3.89306e-81	SC
SDCCAG8	9.48849e-76	0.311479	0.401	0.306	2.59178e-71	SC
CTTN	7.28259e-94	0.31111	0.369	0.264	1.98924e-89	SC
LONP2	3.26182e-98	0.309844	0.415	0.305	8.90965e-94	SC
PODN	5.1083e-114	0.309662	0.35	0.239	1.3953e-109	SC
KDM5B	6.62928e-43	0.308961	0.37	0.302	1.81079e-38	SC
PLSCR1	9.72395e-67	0.308083	0.318	0.234	2.6561e-62	SC
KAT2B	3.03437e-97	0.307827	0.284	0.188	8.28839e-93	SC
ANKRD26	6.46337e-72	0.30719	0.286	0.201	1.76547e-67	SC
PTPN12	8.23403e-98	0.307161	0.436	0.325	2.24912e-93	SC
SUN1	9.9931e-105	0.30708	0.383	0.271	2.7296e-100	SC
TRIM2	2.4327e-118	0.306762	0.291	0.186	6.6451e-114	SC
BCAS3	4.85099e-40	0.306448	0.46	0.402	1.32505e-35	SC
PRKCI	4.3929e-75	0.305588	0.294	0.207	1.19992e-70	SC
VMP1	9.3409e-77	0.305516	0.46	0.36	2.55147e-72	SC
ZCCHC7	1.41781e-64	0.304472	0.598	0.526	3.87275e-60	SC
CACHD1	5.2485e-66	0.304132	0.417	0.327	1.43363e-61	SC
KIRREL1	5.94947e-77	0.304083	0.282	0.195	1.6251e-72	SC
VPS41	4.28136e-90	0.303863	0.316	0.218	1.16945e-85	SC
SEC24B	1.91744e-87	0.302398	0.427	0.322	5.2375e-83	SC
UBE3C	2.7029e-73	0.302018	0.477	0.379	7.38296e-69	SC
CNTLN	1.6696e-77	0.300735	0.434	0.335	4.5605e-73	SC
XPR1	1.03919e-81	0.299661	0.339	0.244	2.83856e-77	SC
HP1BP3	1.2351e-130	0.29939	0.588	0.455	3.3736e-126	SC
IBTK	4.74543e-81	0.299329	0.265	0.178	1.29621e-76	SC
NFKB1	1.48591e-54	0.29872	0.301	0.226	4.05878e-50	SC
NEK7	4.23844e-92	0.298345	0.473	0.363	1.15773e-87	SC
ADCY9	8.51749e-54	0.297475	0.343	0.265	2.32655e-49	SC
MYCBP2	1.2192e-103	0.297343	0.628	0.514	3.3301e-99	SC
GPHN	5.45257e-73	0.297162	0.593	0.506	1.48937e-68	SC
PLA2G5	5.158e-135	0.296516	0.467	0.334	1.4089e-130	SC
GBF1	1.35422e-64	0.295942	0.303	0.221	3.69906e-60	SC
SBF2	2.9277e-103	0.295893	0.778	0.693	7.9969e-99	SC
OXR1	2.30504e-67	0.295498	0.272	0.192	6.29623e-63	SC
LARGE1	4.42028e-40	0.295269	0.56	0.502	1.2074e-35	SC
PLEKHA5	8.0812e-114	0.294758	0.73	0.621	2.2074e-109	SC
ATP2B4	5.4992e-105	0.294742	0.332	0.227	1.5021e-100	SC
CUL1	1.0117e-106	0.294237	0.428	0.312	2.7634e-102	SC
KIF1B	3.24558e-63	0.293917	0.403	0.315	8.86531e-59	SC
STXBP4	3.04961e-48	0.29272	0.286	0.219	8.33002e-44	SC
MTMR3	8.70692e-86	0.292178	0.404	0.301	2.3783e-81	SC
DCP1A	1.55534e-63	0.292076	0.282	0.203	4.2484e-59	SC
ZRANB2	1.69178e-91	0.291543	0.425	0.318	4.6211e-87	SC
FRYL	2.00908e-87	0.291341	0.452	0.346	5.48782e-83	SC
TNRC6C	1.26767e-87	0.291097	0.353	0.253	3.46265e-83	SC
TMTC1	6.42563e-57	0.290236	0.451	0.367	1.75516e-52	SC
PPP6R3	4.4729e-119	0.289878	0.758	0.652	1.2218e-114	SC
CAST	7.46729e-80	0.289228	0.393	0.294	2.03969e-75	SC
ZBTB20	1.3176e-155	0.288981	0.919	0.877	3.5989e-151	SC
NIPBL	2.07317e-96	0.288535	0.684	0.584	5.66285e-92	SC
TPST1	1.12024e-23	0.28847	0.419	0.377	3.05993e-19	SC
SPOP	6.0408e-119	0.288433	0.305	0.197	1.65e-114	SC
STARD13	3.44842e-24	0.287748	0.355	0.309	9.41937e-20	SC
DENND1A	5.89122e-71	0.287247	0.52	0.424	1.60919e-66	SC
PTEN	2.30997e-71	0.286627	0.52	0.425	6.30968e-67	SC
SNX29	6.02477e-49	0.286424	0.402	0.327	1.64567e-44	SC
RALGAPA1	9.26844e-96	0.284551	0.672	0.566	2.53167e-91	SC
CAPN7	1.5406e-78	0.284503	0.406	0.307	4.20815e-74	SC
PCM1	3.4582e-115	0.284346	0.62	0.496	9.4462e-111	SC
INVS	4.41377e-68	0.283893	0.412	0.319	1.20562e-63	SC
RNPC3	3.14987e-77	0.283809	0.259	0.175	8.60387e-73	SC
ZNF654	1.9753e-70	0.28373	0.288	0.204	5.39553e-66	SC
LMBRD1	1.01192e-85	0.283714	0.277	0.187	2.76405e-81	SC
BRAF	5.95075e-76	0.283456	0.57	0.472	1.62545e-71	SC
STX8	1.00492e-40	0.283016	0.296	0.237	2.74493e-36	SC
CACNA2D3	6.86043e-36	0.282934	0.315	0.255	1.87393e-31	SC
NRDC	6.64954e-77	0.282631	0.468	0.367	1.81632e-72	SC
C20orf194	1.46261e-60	0.282369	0.375	0.291	3.99513e-56	SC
MUC20-OT1	6.3553e-101	0.281999	0.585	0.469	1.73595e-96	SC
EPC2	1.77106e-86	0.281724	0.368	0.268	4.83765e-82	SC
ANKRD10	1.58117e-95	0.281341	0.488	0.375	4.31897e-91	SC
SCAPER	3.00707e-72	0.281318	0.476	0.379	8.21382e-68	SC
AC124312.1	1.0073e-109	0.281251	0.417	0.301	2.7513e-105	SC
SNRNP70	4.64385e-81	0.281114	0.306	0.215	1.26847e-76	SC
CAPZB	4.41362e-51	0.281045	0.56	0.479	1.20558e-46	SC
MAP3K3	4.25868e-73	0.280796	0.271	0.188	1.16326e-68	SC
LRBA	8.24205e-56	0.280082	0.485	0.403	2.25132e-51	SC
PLOD2	4.8904e-35	0.279995	0.409	0.343	1.33581e-30	SC
COG5	1.39658e-74	0.279699	0.496	0.398	3.81475e-70	SC
DIP2C	1.22295e-81	0.279589	0.589	0.486	3.34048e-77	SC
ATM	4.3519e-100	0.279506	0.44	0.328	1.18873e-95	SC
POLK	1.51041e-85	0.279247	0.351	0.252	4.1257e-81	SC
ORC4	1.1661e-99	0.279143	0.318	0.217	3.18527e-95	SC
EPS15	6.57834e-77	0.278832	0.475	0.375	1.79687e-72	SC
FAM168A	7.18811e-42	0.278766	0.282	0.219	1.96343e-37	SC
LYPLAL1	1.60079e-82	0.278065	0.293	0.203	4.37255e-78	SC
ASAP3	1.91565e-85	0.277668	0.276	0.187	5.23261e-81	SC
PTPRA	7.06097e-70	0.277363	0.393	0.3	1.9287e-65	SC
LRCH3	5.47668e-89	0.277247	0.504	0.394	1.49595e-84	SC
CTDSPL2	1.27951e-60	0.276884	0.32	0.239	3.49497e-56	SC
C11orf49	2.04493e-46	0.276853	0.264	0.198	5.58573e-42	SC
RUFY2	1.91533e-92	0.276369	0.329	0.23	5.23171e-88	SC
ITGAV	4.51731e-72	0.276253	0.372	0.279	1.2339e-67	SC
SPPL3	1.31131e-52	0.276198	0.476	0.4	3.58184e-48	SC
SOBP	9.86919e-50	0.27591	0.374	0.299	2.69577e-45	SC
MOSMO	1.09576e-46	0.27556	0.267	0.201	2.99306e-42	SC
SESTD1	6.07906e-60	0.274488	0.27	0.194	1.66049e-55	SC
ADD1	2.7283e-124	0.274329	0.495	0.368	7.4524e-120	SC
SCFD1	1.70654e-60	0.273787	0.385	0.3	4.66143e-56	SC
RAB3GAP1	2.80972e-72	0.273768	0.428	0.332	7.67476e-68	SC
UBR5	1.37434e-78	0.273393	0.631	0.533	3.75401e-74	SC
ZMIZ1	1.0658e-112	0.272451	0.383	0.269	2.9111e-108	SC
ZHX3	3.07169e-46	0.272183	0.275	0.208	8.39033e-42	SC
METTL15	2.32034e-53	0.27193	0.335	0.257	6.33801e-49	SC
COL4A5	3.76728e-74	0.271914	0.274	0.19	1.02903e-69	SC
GPX3	1.02123e-58	0.271633	0.271	0.196	2.78948e-54	SC
RERE	1.12131e-68	0.271431	0.68	0.598	3.06287e-64	SC
IFT88	1.16637e-54	0.271256	0.282	0.208	3.18594e-50	SC
TRAPPC9	1.31943e-51	0.271068	0.315	0.241	3.60403e-47	SC
RAF1	2.05094e-77	0.2709	0.406	0.308	5.60214e-73	SC
VTI1A	2.5964e-47	0.270858	0.421	0.349	7.09206e-43	SC
DMTF1	1.10653e-98	0.270745	0.382	0.274	3.02248e-94	SC
CHIC2	2.52442e-68	0.270077	0.269	0.189	6.89544e-64	SC
KPNA5	6.5056e-83	0.269507	0.273	0.185	1.77701e-78	SC
ARID4B	1.94854e-86	0.268773	0.612	0.506	5.32243e-82	SC
RB1CC1	6.33816e-89	0.26753	0.528	0.419	1.73127e-84	SC
ELP2	6.61375e-95	0.267389	0.399	0.292	1.80655e-90	SC
APPL1	2.45822e-88	0.266993	0.258	0.17	6.71464e-84	SC
MYO9A	4.03101e-60	0.266841	0.562	0.477	1.10107e-55	SC
PPP2R5E	3.03605e-60	0.266771	0.36	0.276	8.29298e-56	SC
MAN1A1	2.32547e-45	0.266099	0.3	0.231	6.35203e-41	SC
BTBD7	2.07487e-40	0.265352	0.291	0.227	5.66749e-36	SC
CDC42BPA	3.53205e-70	0.264954	0.54	0.444	9.64778e-66	SC
SEC31A	7.646e-98	0.264282	0.582	0.468	2.08851e-93	SC
RNF13	6.19205e-75	0.264021	0.286	0.2	1.69136e-70	SC
BICRAL	1.50499e-72	0.263339	0.312	0.225	4.11087e-68	SC
SECISBP2L	2.02714e-72	0.263327	0.286	0.201	5.53712e-68	SC
TUT4	9.58494e-78	0.262912	0.625	0.525	2.61813e-73	SC
CLASP2	1.11242e-63	0.26269	0.457	0.366	3.03856e-59	SC
CTDSP2	3.8906e-110	0.262549	0.257	0.161	1.0627e-105	SC
RBM6	2.60113e-74	0.261216	0.619	0.521	7.10498e-70	SC
SFSWAP	7.78038e-74	0.261147	0.325	0.236	2.12521e-69	SC
UBR3	7.26086e-79	0.261006	0.585	0.484	1.9833e-74	SC
PPP2R5C	6.77644e-53	0.260874	0.346	0.269	1.85098e-48	SC
CELF1	3.8526e-104	0.260497	0.476	0.36	1.0523e-99	SC
USP40	6.60806e-67	0.260191	0.254	0.177	1.80499e-62	SC
MTUS1	8.8309e-100	0.259879	0.53	0.414	2.41215e-95	SC
CEP85L	8.06502e-57	0.259597	0.372	0.29	2.20296e-52	SC
RAB28	6.5223e-46	0.259295	0.292	0.224	1.78157e-41	SC
ERI3	3.76501e-78	0.25902	0.294	0.205	1.02841e-73	SC
DLG2	6.84512e-43	0.257514	0.628	0.567	1.86975e-38	SC
RPL37	2.76483e-26	0.257513	0.418	0.363	7.55214e-22	SC
DENND6A	2.37588e-71	0.257499	0.291	0.206	6.48971e-67	SC
GK5	5.18567e-78	0.257118	0.255	0.173	1.41647e-73	SC
RFX7	1.61836e-46	0.256193	0.268	0.201	4.42054e-42	SC
ZBTB44	1.5091e-80	0.255544	0.324	0.231	4.12212e-76	SC
IQGAP1	1.68451e-74	0.255209	0.363	0.271	4.60124e-70	SC
KANTR	3.38927e-70	0.255058	0.285	0.203	9.25778e-66	SC
PTBP2	7.14673e-68	0.254947	0.458	0.364	1.95213e-63	SC
OGT	4.87799e-94	0.254781	0.37	0.267	1.33242e-89	SC
CEP112	3.70464e-39	0.254565	0.388	0.321	1.01192e-34	SC
MICU2	7.58917e-51	0.254516	0.283	0.212	2.07298e-46	SC
PBX1	2.09436e-30	0.253726	0.791	0.765	5.72075e-26	SC
SEC63	6.4551e-64	0.253495	0.389	0.301	1.76321e-59	SC
TAB2	9.4883e-71	0.253394	0.374	0.282	2.59173e-66	SC
HNRNPD	7.60043e-98	0.253331	0.393	0.285	2.07606e-93	SC
TBCK	1.081e-66	0.252543	0.455	0.362	2.95274e-62	SC
ACBD6	4.86883e-48	0.252332	0.383	0.307	1.32992e-43	SC
TOP2B	1.50402e-67	0.252203	0.332	0.246	4.10823e-63	SC
RBM33	8.24265e-83	0.251595	0.401	0.3	2.25148e-78	SC
TLK2	1.6371e-77	0.251549	0.432	0.333	4.47174e-73	SC
FOSL2	3.99734e-38	0.251535	0.433	0.365	1.09187e-33	SC
MAP4K5	1.67735e-67	0.251482	0.539	0.444	4.58167e-63	SC
ZNF518A	3.5727e-63	0.251366	0.34	0.256	9.75882e-59	SC
PIBF1	2.30481e-46	0.250525	0.423	0.347	6.29558e-42	SC
PCMTD2	1.7904e-115	0.250501	0.257	0.159	4.8904e-111	SC
RABGAP1L	8.58015e-32	0.250167	0.492	0.443	2.34367e-27	SC
OTUD7B	3.56607e-62	0.250095	0.264	0.187	9.74071e-58	SC
IFITM3	3.70346e-30	-0.25213	0.269	0.297	1.0116e-25	SC
IL6ST	1.63325e-65	-0.253278	0.4	0.404	4.46122e-61	SC
PTPN14	4.69318e-23	-0.257804	0.256	0.27	1.28194e-18	SC
PAWR	3.51507e-60	-0.2604	0.416	0.454	9.60141e-56	SC
JARID2	3.41861e-35	-0.260607	0.298	0.315	9.33793e-31	SC
SON	1.49421e-73	-0.261542	0.407	0.432	4.08142e-69	SC
UNC5C	2.05518e-15	-0.261705	0.238	0.26	5.61373e-11	SC
EXT1	3.17883e-47	-0.262564	0.366	0.442	8.68296e-43	SC
PACS1	3.34717e-28	-0.264969	0.39	0.409	9.14279e-24	SC
ATP13A3	4.89093e-44	-0.265719	0.241	0.274	1.33596e-39	SC
HIVEP2	2.71486e-52	-0.266074	0.504	0.508	7.41563e-48	SC
RALGPS2	4.54842e-51	-0.266557	0.402	0.432	1.2424e-46	SC
RPS25	7.89591e-29	-0.266959	0.355	0.367	2.15677e-24	SC
CNTN1	1.99986e-39	-0.267075	0.24	0.302	5.46261e-35	SC
RPS24	1.89685e-41	-0.267293	0.469	0.52	5.18125e-37	SC
GNAS	2.80989e-63	-0.26795	0.432	0.457	7.67523e-59	SC
RPL36	3.47663e-45	-0.269481	0.452	0.518	9.4964e-41	SC
STIM1	5.97103e-52	-0.271196	0.316	0.355	1.63099e-47	SC
PLEKHA7	9.41365e-28	-0.271584	0.398	0.414	2.57134e-23	SC
RPLP2	1.46078e-33	-0.271676	0.334	0.373	3.99012e-29	SC
EIF4A2	3.13374e-53	-0.273708	0.244	0.275	8.55981e-49	SC
NECTIN3	5.07871e-49	-0.274505	0.254	0.294	1.38725e-44	SC
CCNH	1.19756e-45	-0.276615	0.483	0.455	3.27113e-41	SC
WIPF3	2.08813e-46	-0.277467	0.338	0.402	5.70372e-42	SC
FP236383.1	3.44402e-83	-0.278048	0.588	0.564	9.40735e-79	SC
SFT2D2	3.16791e-69	-0.278984	0.233	0.26	8.65316e-65	SC
PDGFD	6.63015e-19	-0.279208	0.431	0.474	1.81102e-14	SC
SPTBN1	7.25514e-80	-0.279771	0.605	0.611	1.98174e-75	SC
RPL21	1.91304e-38	-0.281033	0.254	0.271	5.22547e-34	SC
CHD1	1.98824e-70	-0.283151	0.395	0.388	5.43089e-66	SC
GNA12	3.42679e-65	-0.284533	0.367	0.386	9.36028e-61	SC
DST	1.49153e-84	-0.284952	0.558	0.59	4.07412e-80	SC
PBX3	1.11907e-49	-0.2854	0.627	0.69	3.05675e-45	SC
TLE4	1.5483e-50	-0.285949	0.344	0.392	4.22919e-46	SC
PDE10A	4.21435e-14	-0.286585	0.322	0.315	1.15115e-09	SC
GATA4	1.22615e-60	-0.287238	0.389	0.465	3.34924e-56	SC
ARPC2	1.02356e-54	-0.288299	0.221	0.264	2.79586e-50	SC
RPS16	6.64669e-41	-0.288308	0.362	0.387	1.81554e-36	SC
HSPA1B	0	-0.288402	0.541	0.393	0	SC
QSOX1	4.16498e-60	-0.2886	0.211	0.259	1.13766e-55	SC
PRPF4B	4.17532e-67	-0.289841	0.25	0.291	1.14049e-62	SC
ZNF90	6.05128e-49	-0.290234	0.308	0.319	1.65291e-44	SC
ZNF331	2.36447e-36	-0.290707	0.286	0.292	6.45855e-32	SC
PPP1CB	2.03572e-65	-0.290979	0.345	0.38	5.56058e-61	SC
SMOC2	3.82602e-44	-0.291194	0.33	0.368	1.04508e-39	SC
PLD1	4.1608e-56	-0.292488	0.387	0.44	1.13652e-51	SC
ANK2	8.25711e-46	-0.292979	0.333	0.401	2.25543e-41	SC
LUM	1.43311e-30	-0.294783	0.249	0.271	3.91453e-26	SC
ARGLU1	9.2373e-102	-0.298938	0.356	0.388	2.52318e-97	SC
COL12A1	1.81781e-55	-0.298946	0.368	0.425	4.96535e-51	SC
GLI2	2.52362e-63	-0.301589	0.277	0.327	6.89327e-59	SC
MATN2	8.76009e-53	-0.302265	0.218	0.278	2.39282e-48	SC
CHSY1	1.25292e-42	-0.302852	0.252	0.286	3.42236e-38	SC
ACACA	2.11174e-50	-0.30294	0.235	0.295	5.76823e-46	SC
SF1	2.1753e-106	-0.303973	0.331	0.361	5.9418e-102	SC
RYBP	2.57954e-59	-0.308035	0.263	0.3	7.04602e-55	SC
ZFP36L1	3.9682e-106	-0.312042	0.535	0.537	1.0839e-101	SC
ATP2C1	3.18713e-85	-0.312299	0.289	0.303	8.70565e-81	SC
TXNRD1	1.70382e-57	-0.314397	0.581	0.615	4.654e-53	SC
RPL28	7.38795e-72	-0.314576	0.517	0.598	2.01802e-67	SC
DSTN	6.46334e-53	-0.316011	0.257	0.283	1.76546e-48	SC
TMBIM6	1.01959e-70	-0.316543	0.236	0.268	2.78502e-66	SC
TSHZ1	5.09155e-75	-0.316911	0.29	0.314	1.39076e-70	SC
DAPK1	3.88785e-53	-0.319896	0.521	0.565	1.06197e-48	SC
PGR	1.34276e-48	-0.324256	0.251	0.28	3.66774e-44	SC
DNAJB1	1.5243e-227	-0.328694	0.309	0.269	4.1636e-223	SC
RPL24	3.52839e-45	-0.331745	0.245	0.272	9.6378e-41	SC
RAD51B	4.89027e-83	-0.332046	0.651	0.721	1.33578e-78	SC
UBA52	3.70526e-51	-0.332547	0.313	0.354	1.01209e-46	SC
RPS6	3.14554e-40	-0.334055	0.454	0.505	8.59203e-36	SC
TENT5A	1.11301e-61	-0.335304	0.233	0.302	3.04018e-57	SC
DOCK5	7.61035e-68	-0.3363	0.301	0.345	2.07877e-63	SC
RPL6	1.16428e-47	-0.337867	0.415	0.462	3.18023e-43	SC
PTPRK	1.79687e-63	-0.340046	0.542	0.596	4.90816e-59	SC
RPL35A	4.83053e-55	-0.341842	0.35	0.407	1.31946e-50	SC
MYH10	5.0834e-69	-0.345088	0.208	0.268	1.38853e-64	SC
PIK3R1	2.40829e-56	-0.346941	0.326	0.367	6.57823e-52	SC
PDXDC1	1.1108e-115	-0.350735	0.364	0.398	3.0341e-111	SC
ESYT2	1.5785e-111	-0.351653	0.578	0.53	4.3115e-107	SC
RPL13A	7.65553e-92	-0.352224	0.552	0.647	2.09111e-87	SC
PSD3	1.56239e-80	-0.352571	0.596	0.662	4.26767e-76	SC
SGK1	2.83439e-63	-0.352627	0.321	0.402	7.74214e-59	SC
RPS29	1.39539e-52	-0.352978	0.299	0.349	3.8115e-48	SC
SIK2	5.07903e-72	-0.353934	0.426	0.451	1.38734e-67	SC
ADAM12	1.7859e-42	-0.355674	0.216	0.27	4.87819e-38	SC
ASAP1	1.1285e-111	-0.356589	0.508	0.576	3.0825e-107	SC
MAMDC2	4.7839e-78	-0.357161	0.523	0.512	1.30672e-73	SC
ITM2B	1.92691e-95	-0.358553	0.486	0.555	5.26336e-91	SC
DNAJB6	1.8502e-153	-0.360022	0.373	0.382	5.0538e-149	SC
SLC25A17	1.98178e-74	-0.361968	0.248	0.302	5.41323e-70	SC
MIR99AHG	4.2142e-164	-0.362422	0.854	0.875	1.1511e-159	SC
MEF2C	9.07795e-67	-0.366301	0.254	0.323	2.47964e-62	SC
RPL23A	2.1079e-52	-0.368036	0.382	0.4	5.75772e-48	SC
RPS11	9.1006e-65	-0.370458	0.423	0.492	2.48583e-60	SC
GLUL	4.25526e-84	-0.370981	0.282	0.292	1.16232e-79	SC
TLN2	2.15106e-33	-0.371083	0.254	0.293	5.87563e-29	SC
CCT4	2.11879e-91	-0.37215	0.225	0.268	5.78748e-87	SC
GOLGB1	4.4709e-96	-0.374192	0.264	0.325	1.22123e-91	SC
TPM1	4.83161e-85	-0.376742	0.336	0.379	1.31976e-80	SC
RPL23	5.55677e-63	-0.377167	0.282	0.31	1.51783e-58	SC
RPL13	2.3914e-177	-0.378618	0.717	0.831	6.5321e-173	SC
FNDC3B	2.9638e-182	-0.37992	0.816	0.812	8.0955e-178	SC
NACA	3.32565e-57	-0.381603	0.325	0.363	9.08402e-53	SC
ITPR1	1.3981e-116	-0.383911	0.521	0.602	3.8189e-112	SC
PPP2CB	9.2208e-121	-0.384226	0.363	0.436	2.5187e-116	SC
RERG	1.42013e-43	-0.385792	0.276	0.334	3.8791e-39	SC
DGKD	4.44942e-70	-0.389975	0.222	0.278	1.21536e-65	SC
GRAMD2B	7.34872e-69	-0.390583	0.353	0.399	2.0073e-64	SC
ELOVL5	3.04594e-82	-0.391987	0.222	0.287	8.31997e-78	SC
RASAL2	2.36964e-76	-0.392412	0.252	0.334	6.47266e-72	SC
GREB1L	1.95903e-77	-0.395005	0.286	0.363	5.3511e-73	SC
RPL19	1.07925e-51	-0.395356	0.41	0.455	2.94798e-47	SC
RPS9	2.96267e-71	-0.398907	0.495	0.517	8.09253e-67	SC
LIFR	8.41904e-83	-0.400349	0.311	0.38	2.29966e-78	SC
RPS19	1.43905e-78	-0.400882	0.538	0.616	3.93077e-74	SC
FKBP5	9.5441e-149	-0.401112	0.62	0.594	2.607e-144	SC
LHFPL2	4.99143e-88	-0.402943	0.248	0.306	1.36341e-83	SC
FXR1	4.8979e-215	-0.403727	0.514	0.489	1.3379e-210	SC
HMGB1	9.0439e-103	-0.404621	0.396	0.448	2.47035e-98	SC
RPS5	5.75888e-75	-0.407086	0.372	0.427	1.57304e-70	SC
IRS1	1.0223e-107	-0.409109	0.391	0.455	2.7925e-103	SC
COL18A1	7.6862e-138	-0.415692	0.33	0.338	2.0995e-133	SC
TGFBR3	8.9232e-118	-0.418815	0.726	0.688	2.4374e-113	SC
ZFAND5	1.09444e-97	-0.42305	0.342	0.404	2.98947e-93	SC
RPS15	7.72409e-90	-0.423832	0.484	0.572	2.10984e-85	SC
RBMS3-AS3	1.122e-105	-0.430521	0.232	0.273	3.0647e-101	SC
CBR4	2.08862e-97	-0.431124	0.282	0.322	5.70507e-93	SC
EEF1A1	4.11257e-75	-0.431186	0.575	0.622	1.12335e-70	SC
COL4A2	1.59783e-88	-0.431204	0.355	0.425	4.36447e-84	SC
UBC	1.54966e-83	-0.442233	0.243	0.32	4.23289e-79	SC
FOXO1	3.0534e-112	-0.442313	0.699	0.728	8.3402e-108	SC
H3F3B	8.4094e-105	-0.442632	0.329	0.371	2.297e-100	SC
KLF9	5.2398e-118	-0.445835	0.261	0.329	1.4313e-113	SC
ST13	5.3206e-175	-0.446427	0.429	0.467	1.4533e-170	SC
TPM4	7.7801e-116	-0.449935	0.259	0.342	2.1251e-111	SC
APLP2	2.627e-108	-0.451731	0.212	0.28	7.1755e-104	SC
NAV3	4.9507e-184	-0.458141	0.657	0.758	1.3523e-179	SC
RPS27A	2.60666e-69	-0.459288	0.455	0.509	7.12009e-65	SC
SOX4	1.30647e-91	-0.467441	0.186	0.251	3.56861e-87	SC
ZSWIM6	7.6605e-106	-0.469423	0.365	0.45	2.0925e-101	SC
RACK1	3.9863e-100	-0.474443	0.366	0.425	1.08886e-95	SC
PSAP	5.3836e-148	-0.475844	0.323	0.393	1.4705e-143	SC
FP671120.1	2.5819e-267	-0.47628	0.676	0.657	7.0525e-263	SC
RPS8	3.5993e-146	-0.477932	0.524	0.643	9.8316e-142	SC
SLC7A2	1.7754e-104	-0.482475	0.485	0.465	4.8496e-100	SC
APP	5.9098e-182	-0.482725	0.505	0.578	1.6143e-177	SC
MT-ND3	2.0455e-193	-0.484078	0.726	0.837	5.5872e-189	SC
RPL7	7.86878e-88	-0.485161	0.321	0.371	2.14936e-83	SC
NEAT1	1.4454e-194	-0.493787	0.912	0.862	3.948e-190	SC
PDK4	8.8287e-111	-0.494233	0.311	0.301	2.4116e-106	SC
DMD	1.0004e-120	-0.494549	0.36	0.456	2.7326e-116	SC
MBNL2	5.4678e-224	-0.495041	0.562	0.63	1.4935e-219	SC
COL6A1	1.5725e-174	-0.497969	0.421	0.478	4.2953e-170	SC
DNAJA1	1.6437e-159	-0.49824	0.231	0.28	4.4898e-155	SC
TSC22D1	2.9621e-145	-0.498746	0.335	0.446	8.0911e-141	SC
MUM1L1	1.2436e-123	-0.499368	0.482	0.577	3.3968e-119	SC
HS3ST1	2.0562e-125	-0.500837	0.176	0.264	5.6166e-121	SC
JAM3	6.254e-127	-0.501274	0.286	0.347	1.7083e-122	SC
RPL18	8.6417e-109	-0.506228	0.453	0.531	2.3605e-104	SC
AMBRA1	2.8564e-147	-0.509041	0.579	0.618	7.8023e-143	SC
KTN1	4.5221e-196	-0.509823	0.437	0.511	1.2352e-191	SC
RPL14	2.63636e-98	-0.512242	0.372	0.422	7.20122e-94	SC
RYR2	2.0278e-115	-0.513476	0.229	0.341	5.539e-111	SC
NR4A1	1.16106e-91	-0.51356	0.286	0.349	3.17144e-87	SC
MT-ND2	6.9822e-145	-0.518085	0.574	0.627	1.9072e-140	SC
RPLP1	1.3905e-124	-0.518929	0.526	0.605	3.7982e-120	SC
RPS2	1.2504e-107	-0.520817	0.383	0.459	3.4155e-103	SC
TCEAL9	2.5331e-144	-0.521593	0.231	0.315	6.9192e-140	SC
ADAMTS1	9.5814e-109	-0.523783	0.368	0.451	2.6172e-104	SC
CERS6	1.7209e-148	-0.531967	0.355	0.457	4.7007e-144	SC
ITGB1	5.3343e-181	-0.538126	0.291	0.382	1.4571e-176	SC
GREB1	1.0652e-290	-0.541984	0.743	0.782	2.9097e-286	SC
PVT1	1.8245e-245	-0.543748	0.526	0.613	4.9836e-241	SC
ST3GAL4	2.4373e-145	-0.544621	0.19	0.279	6.6576e-141	SC
MIB1	7.1918e-264	-0.546849	0.512	0.533	1.9644e-259	SC
PLXNA4	2.4842e-75	-0.547243	0.285	0.327	6.78559e-71	SC
CD81	4.5461e-158	-0.548747	0.215	0.304	1.2418e-153	SC
TPT1	1.2089e-146	-0.549812	0.549	0.628	3.302e-142	SC
MKL1	1.033e-185	-0.55004	0.46	0.535	2.8216e-181	SC
FILIP1L	5.9939e-137	-0.552795	0.24	0.332	1.6372e-132	SC
ANXA5	6.6965e-150	-0.555518	0.23	0.304	1.8292e-145	SC
C11orf96	2.2132e-133	-0.556226	0.315	0.406	6.0453e-129	SC
ACTG1	4.1959e-128	-0.563252	0.415	0.504	1.1461e-123	SC
MT-CYB	4.4463e-215	-0.57372	0.621	0.742	1.2145e-210	SC
MT-CO2	8.4526e-237	-0.574306	0.663	0.784	2.3088e-232	SC
PDE7B	1.11493e-95	-0.575647	0.297	0.382	3.04543e-91	SC
BEX3	6.154e-151	-0.575826	0.199	0.284	1.681e-146	SC
RPL3	9.0463e-129	-0.57608	0.45	0.527	2.471e-124	SC
SESN1	9.3488e-161	-0.581319	0.253	0.352	2.5536e-156	SC
MT-ND4L	9.2773e-176	-0.582565	0.267	0.345	2.5341e-171	SC
ACTA2	4.3683e-133	-0.584249	0.197	0.275	1.1932e-128	SC
CST3	1.5682e-139	-0.587193	0.221	0.294	4.2836e-135	SC
FTH1	8.3763e-124	-0.58922	0.409	0.485	2.288e-119	SC
RPS13	3.6393e-115	-0.589517	0.251	0.324	9.9408e-111	SC
RDX	3.0893e-152	-0.593666	0.276	0.349	8.4383e-148	SC
FTL	2.9414e-130	-0.599643	0.479	0.55	8.0343e-126	SC
APOO	1.4e-145	-0.608894	0.478	0.539	3.8241e-141	SC
RPL5	9.2112e-164	-0.609174	0.308	0.382	2.516e-159	SC
HIBCH	2.414e-246	-0.611831	0.349	0.367	6.5939e-242	SC
LAPTM4A	1.2255e-206	-0.612321	0.237	0.326	3.3473e-202	SC
MT-ND4	6.1715e-205	-0.6156	0.638	0.746	1.6857e-200	SC
CHORDC1	4.3872e-293	-0.61912	0.278	0.297	1.1984e-288	SC
RPL27	9.6188e-139	-0.622169	0.217	0.303	2.6274e-134	SC
DUSP1	6.4128e-153	-0.623692	0.235	0.334	1.7517e-148	SC
NCALD	2.5297e-195	-0.626424	0.266	0.411	6.9098e-191	SC
LINGO1	5.1529e-245	-0.631666	0.279	0.381	1.4075e-240	SC
SERPINE2	2.5318e-171	-0.631963	0.163	0.268	6.9156e-167	SC
HSPB1	0	-0.637231	0.438	0.383	0	SC
MYL9	1.8612e-194	-0.638452	0.204	0.309	5.0837e-190	SC
COL4A1	8.9504e-168	-0.639834	0.253	0.365	2.4448e-163	SC
ENAH	2.9637e-223	-0.639959	0.297	0.43	8.0954e-219	SC
FAU	1.1955e-143	-0.640311	0.22	0.304	3.2655e-139	SC
MORF4L2	0	-0.646439	0.481	0.565	0	SC
RAB11A	1.603e-229	-0.646908	0.249	0.323	4.3785e-225	SC
PTMS	3.7657e-215	-0.649294	0.21	0.318	1.0286e-210	SC
RPL29	3.0423e-162	-0.652969	0.409	0.514	8.3099e-158	SC
RPL27A	1.9491e-170	-0.659783	0.307	0.398	5.3241e-166	SC
ATRNL1	2.4982e-152	-0.671583	0.284	0.397	6.8238e-148	SC
COL3A1	2.2031e-171	-0.671805	0.297	0.364	6.0177e-167	SC
PTMA	1.78e-235	-0.673201	0.326	0.443	4.862e-231	SC
AFF3	1.667e-262	-0.681605	0.461	0.595	4.5533e-258	SC
CEBPB	2.2916e-218	-0.682557	0.199	0.304	6.2596e-214	SC
RPL41	1.3101e-193	-0.696869	0.508	0.573	3.5786e-189	SC
HSP90AB1	9.438e-293	-0.716007	0.442	0.55	2.578e-288	SC
PEBP1	5.7154e-213	-0.716451	0.152	0.254	1.5612e-208	SC
LGALS1	6.8183e-204	-0.720125	0.232	0.339	1.8624e-199	SC
MT-CO3	0	-0.721078	0.637	0.883	0	SC
RPL7A	5.0913e-206	-0.730284	0.359	0.453	1.3907e-201	SC
CALD1	0	-0.730304	0.78	0.861	0	SC
RPS3	8.569e-203	-0.733564	0.473	0.556	2.3406e-198	SC
RPL30	1.247e-216	-0.734689	0.343	0.461	3.4061e-212	SC
GRK5	4.0169e-231	-0.73534	0.499	0.582	1.0972e-226	SC
SEMA6A	4.479e-132	-0.74151	0.18	0.278	1.2234e-127	SC
MT-ND5	8.797e-280	-0.74811	0.332	0.445	2.4029e-275	SC
XPO5	2.4882e-228	-0.748527	0.234	0.329	6.7964e-224	SC
RPS23	2.2576e-211	-0.750399	0.386	0.496	6.1666e-207	SC
DHFR	2.8444e-271	-0.7504	0.25	0.372	7.7694e-267	SC
GAPDH	1.7607e-205	-0.753429	0.211	0.328	4.8093e-201	SC
TCEAL4	1.6732e-281	-0.759459	0.233	0.37	4.5702e-277	SC
LINC00486	0	-0.762284	0.388	0.55	0	SC
RPL11	3.6591e-219	-0.765712	0.454	0.548	9.9947e-215	SC
EIF1	1.2052e-257	-0.767251	0.288	0.408	3.2921e-253	SC
DPYSL3	4.7089e-157	-0.773618	0.279	0.373	1.2862e-152	SC
MALAT1	0	-0.77547	0.999	0.997	0	SC
SMARCA1	1.5369e-218	-0.777285	0.312	0.415	4.1982e-214	SC
ADAMTS16	8.2989e-266	-0.783743	0.165	0.324	2.2668e-261	SC
RPL10A	5.3025e-232	-0.786892	0.314	0.406	1.4484e-227	SC
SYT1	4.3891e-257	-0.792702	0.114	0.257	1.1989e-252	SC
SPARCL1	8.7905e-250	-0.796699	0.18	0.314	2.4011e-245	SC
LONRF2	3.8497e-250	-0.807282	0.291	0.379	1.0515e-245	SC
PTGES3	0	-0.809201	0.555	0.532	0	SC
MT-ATP6	0	-0.822573	0.64	0.852	0	SC
MT-ND1	0	-0.834009	0.455	0.635	0	SC
HSPA4	4.0558e-297	-0.839869	0.184	0.286	1.1078e-292	SC
SESN3	4.5652e-254	-0.842692	0.217	0.299	1.247e-249	SC
RPS18	3.9545e-291	-0.855202	0.388	0.505	1.0802e-286	SC
MAGI1	3.9415e-297	-0.856088	0.219	0.388	1.0766e-292	SC
RPS14	1.2273e-263	-0.864138	0.311	0.432	3.3524e-259	SC
VIM	0	-0.864376	0.657	0.799	0	SC
RPS7	9.9204e-275	-0.875521	0.318	0.44	2.7097e-270	SC
ALDH7A1	3.3409e-241	-0.876867	0.368	0.473	9.1256e-237	SC
BAIAP2L1	2.7518e-240	-0.877786	0.266	0.371	7.5165e-236	SC
RPL10	0	-0.894184	0.511	0.602	0	SC
INO80D	0	-0.894707	0.432	0.526	0	SC
MYL6	4.0235e-283	-0.895292	0.226	0.356	1.099e-278	SC
ACTB	0	-0.901366	0.371	0.534	0	SC
CD63	2.0974e-291	-0.907784	0.132	0.26	5.7289e-287	SC
SERPINH1	0	-0.916323	0.201	0.328	0	SC
SLC38A2	0	-0.916348	0.468	0.567	0	SC
OSBPL1A	1.02156470031024e-312	-0.916466	0.252	0.345	2.7904e-308	SC
COL1A2	0	-0.917424	0.472	0.565	0	SC
EPS8	0	-0.941066	0.518	0.684	0	SC
SRP14	0	-0.96973	0.116	0.262	0	SC
AC012409.2	0	-0.988169	0.142	0.274	0	SC
JUND	0	-0.992312	0.339	0.567	0	SC
HSPD1	0	-0.993718	0.269	0.389	0	SC
CTNNA3	0	-1.00466	0.195	0.407	0	SC
PPARG	0	-1.0069	0.239	0.434	0	SC
STAR	0	-1.00985	0.175	0.333	0	SC
CRISPLD2	1.7689e-275	-1.01931	0.219	0.3	4.8317e-271	SC
THUMPD1	0	-1.02187	0.114	0.259	0	SC
RPL15	0	-1.03231	0.397	0.555	0	SC
SERF2	0	-1.03285	0.198	0.343	0	SC
AC105402.3	2.3574e-283	-1.03489	0.232	0.344	6.4393e-279	SC
ROBO2	9.5038e-271	-1.04384	0.153	0.29	2.596e-266	SC
SLC12A2	0	-1.07039	0.162	0.31	0	SC
HSP90AA1	3.2592e-269	-1.07914	0.723	0.656	8.9024e-265	SC
PDZRN4	0	-1.09382	0.149	0.377	0	SC
JUN	0	-1.09634	0.152	0.336	0	SC
GPC6	0	-1.11465	0.302	0.542	0	SC
RASGEF1B	0	-1.11954	0.447	0.573	0	SC
MTRNR2L12	0	-1.15043	0.261	0.431	0	SC
TIMP1	0	-1.16619	0.315	0.462	0	SC
SPARC	0	-1.16875	0.188	0.381	0	SC
DLGAP1	1.0256e-288	-1.17044	0.203	0.369	2.8015e-284	SC
TAGLN	0	-1.18255	0.157	0.353	0	SC
RBP1	0	-1.18407	0.346	0.462	0	SC
LSAMP	0	-1.19115	0.218	0.418	0	SC
ACSM1	0	-1.20596	0.112	0.261	0	SC
MT-CO1	0	-1.23548	0.448	0.706	0	SC
HSPH1	0	-1.24202	0.338	0.374	0	SC
COL1A1	0	-1.27825	0.247	0.402	0	SC
FN1	0	-1.43081	0.14	0.391	0	SC
CYP11A1	0	-1.44748	0.082	0.265	0	SC
FDX1	0	-1.48362	0.079	0.269	0	SC
PRPS2	0	-1.48793	0.142	0.28	0	SC
B2M	0	-1.54956	0.375	0.595	0	SC
S100A6	0	-1.70132	0.126	0.357	0	SC
TMSB10	0	-1.87546	0.369	0.556	0	SC
TMSB4X	0	-1.88914	0.233	0.518	0	SC
IGFBP7	0	-1.91704	0.217	0.529	0	SC
GSTA1	0	-1.94817	0.002	0.253	0	SC
HBB	0	-1.9606	0.008	0.254	0	SC
ATP1B3	0	-2.06516	0.188	0.321	0	SC
APOC1	0	-2.06851	0.014	0.28	0	SC
APOE	0	-2.2473	0.172	0.468	0	SC
KCNIP4	0	-2.69119	0.065	0.415	0	SC
LINC02147	8.33257e-72	2.13916	0.418	0.132	2.27604e-67	BEC
CDH13	7.23549e-49	1.6623	0.415	0.151	1.97637e-44	BEC
ELL2	1.29051e-55	1.63789	0.379	0.157	3.52504e-51	BEC
NAMPT	4.58381e-86	1.6227	0.592	0.235	1.25207e-81	BEC
RYR3	6.93327e-84	1.54831	0.49	0.118	1.89382e-79	BEC
TLL1	1.50189e-43	1.52331	0.391	0.157	4.1024e-39	BEC
CSGALNACT1	1.962e-61	1.52166	0.625	0.451	5.3592e-57	BEC
SLC2A3	3.78021e-36	1.48939	0.494	0.288	1.03256e-31	BEC
ATP8B1	1.17428e-59	1.48399	0.694	0.411	3.20753e-55	BEC
EPB41L3	7.01456e-72	1.39133	0.358	0.061	1.91603e-67	BEC
GPM6A	6.65637e-48	1.38226	0.394	0.124	1.81819e-43	BEC
LRRC1	1.65443e-50	1.38203	0.429	0.164	4.51907e-46	BEC
CNTNAP3B	5.53998e-76	1.33635	0.705	0.422	1.51325e-71	BEC
ZNF385D	2.21677e-49	1.33162	0.621	0.337	6.0551e-45	BEC
SEMA6D	1.87112e-36	1.2865	0.287	0.133	5.11097e-32	BEC
NUDT4	4.015e-36	1.28094	0.423	0.287	1.0967e-31	BEC
CLIC4	6.26127e-41	1.26135	0.602	0.435	1.71027e-36	BEC
BCR	1.78972e-54	1.25201	0.553	0.278	4.88863e-50	BEC
PLCXD3	5.39504e-37	1.2447	0.472	0.273	1.47366e-32	BEC
CAMK2D	9.64577e-45	1.23208	0.673	0.472	2.63474e-40	BEC
SERPINE1	1.20233e-16	1.20593	0.252	0.133	3.28417e-12	BEC
IL1R1	7.17503e-38	1.19366	0.383	0.164	1.95986e-33	BEC
SKAP2	6.2209e-50	1.16202	0.39	0.149	1.69924e-45	BEC
ST6GALNAC3	3.49091e-60	1.16063	0.76	0.496	9.53542e-56	BEC
TFPI	1.00512e-57	1.1571	0.655	0.455	2.74548e-53	BEC
TMTC1	2.54868e-49	1.15087	0.748	0.567	6.96173e-45	BEC
TMOD1	2.04623e-43	1.12568	0.357	0.154	5.58928e-39	BEC
CHST11	7.48582e-32	1.12351	0.347	0.182	2.04475e-27	BEC
ADAMTS9	3.7363e-33	1.12	0.65	0.479	1.02057e-28	BEC
THSD4	8.89538e-20	1.11608	0.372	0.209	2.42977e-15	BEC
IL4R	5.62885e-53	1.09583	0.565	0.26	1.53752e-48	BEC
GALNT15	3.08301e-39	1.08736	0.483	0.238	8.42125e-35	BEC
ACTN1	1.81479e-39	1.08056	0.533	0.308	4.95709e-35	BEC
PGM5	7.29086e-36	1.071	0.391	0.193	1.9915e-31	BEC
TSHZ2	5.81538e-23	1.06129	0.5	0.364	1.58847e-18	BEC
GNA14	2.04363e-31	1.05456	0.543	0.372	5.58218e-27	BEC
C22orf34	2.64704e-44	1.03631	0.412	0.159	7.23038e-40	BEC
CNTNAP3	4.57298e-48	1.03095	0.301	0.077	1.24911e-43	BEC
EFEMP1	5.05099e-24	1.02686	0.297	0.168	1.37968e-19	BEC
RALGAPA2	2.04222e-61	1.02599	0.893	0.777	5.57834e-57	BEC
ACKR1	2.60876e-32	1.02312	0.252	0.07	7.12584e-28	BEC
TACR1	8.56741e-34	1.02113	0.439	0.195	2.34019e-29	BEC
MSN	2.97299e-35	1.01092	0.705	0.596	8.12071e-31	BEC
HIPK3	1.72267e-44	1.00704	0.763	0.593	4.70546e-40	BEC
ARHGAP26	6.6584e-58	1.00514	0.837	0.716	1.81874e-53	BEC
GBP2	2.16469e-45	0.999601	0.446	0.18	5.91285e-41	BEC
CNKSR3	9.07451e-26	0.994869	0.518	0.343	2.4787e-21	BEC
MAP3K8	6.54474e-52	0.993176	0.33	0.082	1.78769e-47	BEC
LDLRAD3	1.71702e-34	0.991128	0.467	0.288	4.69005e-30	BEC
RAPGEF4	7.03281e-40	0.989995	0.624	0.417	1.92101e-35	BEC
RPH3AL	2.58606e-39	0.984073	0.32	0.116	7.06381e-35	BEC
SRPX	2.05459e-31	0.982066	0.323	0.133	5.61212e-27	BEC
CCSER1	4.91596e-27	0.962007	0.412	0.218	1.34279e-22	BEC
ABLIM3	5.82868e-38	0.95878	0.415	0.173	1.5921e-33	BEC
MCTP1	6.79344e-32	0.950968	0.632	0.394	1.85563e-27	BEC
CHN1	1.85714e-33	0.934276	0.401	0.183	5.07277e-29	BEC
TGM2	1.11356e-36	0.923669	0.423	0.179	3.0417e-32	BEC
SULF1	7.92045e-41	0.910498	0.329	0.097	2.16347e-36	BEC
SETBP1	7.84832e-30	0.895618	0.624	0.462	2.14377e-25	BEC
H3F3A	7.05423e-34	0.893567	0.327	0.126	1.92686e-29	BEC
C9orf3	5.74683e-45	0.889459	0.731	0.588	1.56975e-40	BEC
NEDD4L	9.27017e-25	0.888653	0.483	0.319	2.53215e-20	BEC
CPE	2.5978e-29	0.887653	0.281	0.12	7.09589e-25	BEC
NDRG1	8.80186e-29	0.88505	0.584	0.383	2.40423e-24	BEC
RAPGEF5	1.15249e-35	0.884453	0.71	0.515	3.14803e-31	BEC
GMDS	5.21081e-40	0.878823	0.727	0.539	1.42333e-35	BEC
UGCG	2.9209e-23	0.86996	0.539	0.393	7.97843e-19	BEC
GABARAPL1	9.51103e-29	0.864138	0.38	0.188	2.59794e-24	BEC
DOC2B	5.58016e-56	0.856776	0.251	0.032	1.52422e-51	BEC
L3MBTL4	4.11643e-28	0.850342	0.414	0.223	1.1244e-23	BEC
FMNL2	4.70409e-22	0.831921	0.806	0.749	1.28492e-17	BEC
REV3L	1.3405e-31	0.829388	0.669	0.508	3.66156e-27	BEC
DIAPH2	1.07502e-27	0.816873	0.691	0.504	2.93642e-23	BEC
MEIS2	5.66169e-43	0.804658	0.804	0.683	1.54649e-38	BEC
STXBP6	1.15387e-11	0.797619	0.277	0.174	3.15179e-07	BEC
RAMP3	1.29766e-26	0.792513	0.292	0.116	3.54457e-22	BEC
LRMDA	1.07238e-31	0.787073	0.779	0.714	2.9292e-27	BEC
PECAM1	1.17747e-41	0.786833	0.737	0.477	3.21626e-37	BEC
ERO1A	9.16363e-28	0.769866	0.404	0.206	2.50305e-23	BEC
RPGR	6.85113e-33	0.769787	0.645	0.424	1.87139e-28	BEC
ABI3BP	1.73365e-09	0.769212	0.301	0.241	4.73547e-05	BEC
YBX3	1.37434e-26	0.764244	0.63	0.444	3.75402e-22	BEC
RUNX1T1	6.28442e-27	0.761881	0.557	0.364	1.71659e-22	BEC
LIMA1	2.19277e-26	0.756943	0.514	0.316	5.98954e-22	BEC
MMRN1	1.34701e-41	0.755478	0.348	0.109	3.67935e-37	BEC
MYH9	2.59451e-19	0.750037	0.706	0.594	7.08691e-15	BEC
ITPR2	4.27222e-32	0.749764	0.688	0.547	1.16696e-27	BEC
SH3RF3	9.17207e-14	0.747132	0.462	0.33	2.50535e-09	BEC
MYO1E	9.89547e-25	0.739111	0.716	0.534	2.70295e-20	BEC
PLA2G4A	3.73784e-37	0.738822	0.291	0.082	1.02099e-32	BEC
SVIL	6.27628e-19	0.737828	0.621	0.522	1.71436e-14	BEC
C1orf21	1.07762e-29	0.737052	0.571	0.339	2.94352e-25	BEC
FNBP1	7.41287e-26	0.729731	0.575	0.404	2.02482e-21	BEC
CD9	3.03749e-24	0.728947	0.274	0.107	8.29691e-20	BEC
GALNT18	5.59719e-17	0.726526	0.692	0.589	1.52887e-12	BEC
ARID5B	1.95326e-15	0.726004	0.51	0.362	5.33532e-11	BEC
HMBOX1	5.79754e-26	0.724509	0.659	0.516	1.5836e-21	BEC
IL15	1.76311e-25	0.723453	0.327	0.136	4.81595e-21	BEC
ATP8A1	1.22497e-24	0.716498	0.425	0.226	3.34601e-20	BEC
CAPZB	2.09568e-23	0.715232	0.596	0.458	5.72436e-19	BEC
ETV6	4.05109e-26	0.712601	0.684	0.549	1.10656e-21	BEC
FGD5	7.67043e-26	0.712255	0.625	0.435	2.09518e-21	BEC
PIK3C2B	2.15251e-21	0.707659	0.472	0.284	5.87958e-17	BEC
RNF180	5.47786e-23	0.705201	0.252	0.1	1.49628e-18	BEC
ARRB1	4.88699e-24	0.700316	0.414	0.221	1.33488e-19	BEC
KLHL3	6.20392e-25	0.696316	0.298	0.128	1.6946e-20	BEC
BACE2	3.4468e-24	0.69237	0.795	0.669	9.41494e-20	BEC
TPK1	4.22136e-15	0.688178	0.309	0.187	1.15307e-10	BEC
SCFD2	1.00459e-18	0.68733	0.436	0.268	2.74404e-14	BEC
THRB	1.19964e-20	0.687003	0.304	0.136	3.27682e-16	BEC
FOXP2	1.87358e-13	0.686457	0.291	0.169	5.1177e-09	BEC
SSBP2	6.53575e-26	0.685115	0.656	0.477	1.78524e-21	BEC
PPP1R9A	1.91932e-17	0.681438	0.286	0.168	5.24261e-13	BEC
PIP4K2A	2.19929e-19	0.679635	0.514	0.34	6.00737e-15	BEC
ITGA5	4.23139e-26	0.677759	0.568	0.35	1.1558e-21	BEC
ETS2	2.06984e-22	0.67633	0.46	0.262	5.65378e-18	BEC
ABLIM1	3.60643e-22	0.675656	0.859	0.786	9.85095e-18	BEC
TNS1	5.83927e-22	0.675137	0.586	0.393	1.595e-17	BEC
IL33	9.96584e-19	0.670612	0.277	0.124	2.72217e-14	BEC
ST8SIA6	8.61038e-16	0.670012	0.313	0.162	2.35193e-11	BEC
DANT2	9.13377e-22	0.665944	0.394	0.232	2.49489e-17	BEC
VCL	8.05863e-10	0.664315	0.369	0.288	2.20122e-05	BEC
HIF3A	9.49842e-23	0.660381	0.377	0.188	2.59449e-18	BEC
NFIA	8.24294e-27	0.657583	0.798	0.725	2.25156e-22	BEC
SLC4A7	1.09123e-14	0.657049	0.411	0.282	2.98069e-10	BEC
TPM4	3.50959e-14	0.656087	0.489	0.391	9.58645e-10	BEC
CMSS1	2.09661e-16	0.654463	0.453	0.322	5.72689e-12	BEC
ANXA11	2.77721e-16	0.654215	0.288	0.167	7.58594e-12	BEC
PDIA5	1.5067e-25	0.653807	0.262	0.093	4.11556e-21	BEC
TBC1D22A	2.29676e-19	0.652935	0.645	0.522	6.2736e-15	BEC
PTGIS	2.77322e-16	0.651875	0.382	0.246	7.57505e-12	BEC
NUBPL	6.10936e-18	0.651078	0.298	0.179	1.66877e-13	BEC
SULF2	1.50341e-20	0.650892	0.389	0.214	4.10656e-16	BEC
GMDS-DT	2.91706e-15	0.647982	0.429	0.287	7.96796e-11	BEC
EEA1	1.51642e-17	0.64529	0.475	0.334	4.14211e-13	BEC
SND1	5.64403e-22	0.643087	0.574	0.391	1.54167e-17	BEC
RORA	1.64597e-11	0.638527	0.604	0.525	4.49597e-07	BEC
EEPD1	1.26283e-13	0.636803	0.486	0.424	3.44943e-09	BEC
CGNL1	4.15836e-14	0.635988	0.298	0.185	1.13586e-09	BEC
PDLIM5	2.31564e-16	0.634242	0.691	0.588	6.32516e-12	BEC
VWA8	1.06449e-15	0.633974	0.327	0.207	2.90764e-11	BEC
MTSS1	1.62824e-13	0.633885	0.266	0.144	4.44755e-09	BEC
ALPK1	1.10403e-20	0.633494	0.361	0.192	3.01565e-16	BEC
LAMC1	3.90375e-08	0.628816	0.437	0.365	0.00106631	BEC
BABAM2	5.05838e-24	0.628736	0.656	0.531	1.3817e-19	BEC
CD74	8.29019e-24	0.62795	0.4	0.197	2.26446e-19	BEC
INPP5D	4.63732e-17	0.627196	0.542	0.407	1.26668e-12	BEC
ASRGL1	1.50568e-25	0.625997	0.301	0.117	4.11277e-21	BEC
THADA	1.28326e-17	0.624465	0.54	0.404	3.50524e-13	BEC
GUCY1A1	4.6829e-15	0.623673	0.274	0.134	1.27914e-10	BEC
ACER3	6.36533e-14	0.620811	0.336	0.223	1.73869e-09	BEC
GPCPD1	7.05719e-18	0.620418	0.468	0.309	1.92767e-13	BEC
ACTR3	1.60599e-14	0.619031	0.425	0.309	4.38675e-10	BEC
CHPT1	6.84273e-19	0.618406	0.27	0.123	1.86909e-14	BEC
FNIP2	2.22794e-15	0.617025	0.447	0.301	6.08561e-11	BEC
PDE10A	1.16862e-13	0.614882	0.382	0.392	3.1921e-09	BEC
PDE2A	4.13421e-19	0.613811	0.387	0.211	1.12926e-14	BEC
NR3C2	9.42125e-14	0.613376	0.592	0.491	2.57341e-09	BEC
CLEC1A	7.26442e-16	0.608905	0.435	0.268	1.98428e-11	BEC
AAK1	2.02349e-18	0.607285	0.646	0.532	5.52717e-14	BEC
RAI14	1.1126e-12	0.606874	0.517	0.426	3.03905e-08	BEC
CYTH1	6.97203e-11	0.603164	0.497	0.376	1.90441e-06	BEC
HSPG2	1.15021e-18	0.599241	0.62	0.472	3.14179e-14	BEC
ZNF423	9.61668e-16	0.597892	0.336	0.198	2.6268e-11	BEC
SLC25A37	5.0886e-21	0.597339	0.517	0.324	1.38995e-16	BEC
IMMP2L	2.21777e-18	0.596207	0.706	0.65	6.05783e-14	BEC
PDE3A	1.84847e-08	0.595046	0.37	0.359	0.000504909	BEC
C7	4.99501e-10	0.593107	0.404	0.295	1.36439e-05	BEC
UGGT2	3.70795e-15	0.592027	0.435	0.313	1.01283e-10	BEC
ANXA4	2.64407e-14	0.586083	0.325	0.195	7.22227e-10	BEC
MVP	5.57675e-24	0.586032	0.26	0.1	1.52329e-19	BEC
MAN1A1	1.51912e-11	0.585853	0.418	0.318	4.14949e-07	BEC
DENND5A	1.2074e-14	0.584806	0.475	0.368	3.29803e-10	BEC
FRMD4B	4.32902e-18	0.583467	0.503	0.334	1.18247e-13	BEC
SLCO3A1	1.79935e-10	0.582916	0.481	0.383	4.91492e-06	BEC
ABCD4	2.44755e-13	0.58237	0.359	0.231	6.68549e-09	BEC
SSH2	1.49888e-13	0.582211	0.496	0.401	4.0942e-09	BEC
NAALADL2	1.08039e-06	0.581569	0.292	0.253	0.0295109	BEC
SH3BP5	1.88553e-11	0.579148	0.5	0.418	5.15032e-07	BEC
GNB4	3.24266e-15	0.576118	0.382	0.237	8.85732e-11	BEC
XRRA1	1.69374e-19	0.574408	0.26	0.118	4.62645e-15	BEC
PLA2R1	7.1948e-18	0.573796	0.286	0.144	1.96526e-13	BEC
ERICH1	4.05001e-16	0.564311	0.329	0.184	1.10626e-11	BEC
UBC	1.10568e-15	0.563048	0.701	0.571	3.02017e-11	BEC
MAGI2	4.19168e-10	0.562812	0.475	0.428	1.14496e-05	BEC
C16orf45	1.69931e-13	0.561357	0.341	0.247	4.64166e-09	BEC
TANC2	2.06462e-12	0.560807	0.46	0.376	5.6395e-08	BEC
EMCN	2.56674e-14	0.560134	0.602	0.461	7.01104e-10	BEC
NLRP1	1.01088e-16	0.55857	0.461	0.301	2.76121e-12	BEC
MET	8.17704e-27	0.55767	0.352	0.151	2.23356e-22	BEC
GULP1	1.54604e-12	0.555849	0.547	0.435	4.22302e-08	BEC
INPP4B	9.50121e-13	0.552478	0.331	0.192	2.59525e-08	BEC
MKL1	7.67891e-13	0.552384	0.61	0.527	2.09749e-08	BEC
SCMH1	2.34691e-13	0.55233	0.506	0.392	6.41058e-09	BEC
HIPK2	9.27682e-13	0.552154	0.468	0.347	2.53396e-08	BEC
MARCH3	5.21595e-08	0.549661	0.333	0.258	0.00142474	BEC
CCNY	4.36602e-19	0.549272	0.784	0.729	1.19258e-14	BEC
DOCK6	1.79671e-16	0.546426	0.476	0.303	4.90772e-12	BEC
TNFRSF1B	8.23366e-12	0.545225	0.336	0.212	2.24903e-07	BEC
LYST	5.72864e-14	0.540427	0.6	0.482	1.56478e-09	BEC
WDPCP	1.96006e-11	0.540118	0.446	0.342	5.35391e-07	BEC
INTS10	3.69274e-17	0.539465	0.284	0.143	1.00867e-12	BEC
PTPRE	5.09665e-10	0.538397	0.411	0.321	1.39215e-05	BEC
CDKAL1	4.73853e-17	0.534108	0.678	0.579	1.29433e-12	BEC
CTNND1	3.83632e-10	0.533847	0.43	0.323	1.04789e-05	BEC
ESYT2	2.64983e-16	0.529884	0.648	0.507	7.238e-12	BEC
GPHN	2.97627e-18	0.528785	0.756	0.661	8.12969e-14	BEC
SLCO2A1	3.77802e-09	0.527828	0.322	0.206	0.000103197	BEC
ENPP2	2.48593e-18	0.526164	0.606	0.41	6.79032e-14	BEC
SHANK3	1.91303e-18	0.521716	0.618	0.435	5.22543e-14	BEC
THSD7A	6.70418e-07	0.521352	0.543	0.472	0.0183125	BEC
UBE2B	5.70041e-12	0.521018	0.579	0.457	1.55707e-07	BEC
LIMK2	1.07001e-13	0.51754	0.338	0.194	2.92272e-09	BEC
SMAD3	1.79572e-09	0.51606	0.302	0.232	4.90501e-05	BEC
CAMTA1	1.29205e-13	0.515511	0.659	0.587	3.52923e-09	BEC
RPS6KA2	1.27833e-15	0.513879	0.648	0.503	3.49175e-11	BEC
SLC39A11	2.79859e-12	0.513311	0.286	0.199	7.64436e-08	BEC
ZMIZ1	2.12098e-14	0.511726	0.529	0.382	5.79346e-10	BEC
ITFG1	1.33356e-10	0.508842	0.514	0.451	3.64262e-06	BEC
FOXP1	8.58672e-24	0.508382	0.889	0.847	2.34546e-19	BEC
DOCK4	2.31417e-27	0.507941	0.898	0.838	6.32117e-23	BEC
MAP3K4	6.47494e-16	0.503277	0.43	0.269	1.76863e-11	BEC
HSPA1A	1.5698e-23	0.501168	0.82	0.634	4.2879e-19	BEC
TRAPPC9	1.0044e-11	0.500554	0.471	0.352	2.74352e-07	BEC
EPS15	8.07521e-15	0.499128	0.553	0.454	2.20574e-10	BEC
AFAP1	1.54947e-11	0.498906	0.323	0.204	4.23239e-07	BEC
FBN1	3.04546e-09	0.495914	0.476	0.419	8.31867e-05	BEC
CAMKMT	4.08657e-08	0.495494	0.397	0.363	0.00111625	BEC
SLC16A7	4.09724e-10	0.494427	0.266	0.169	1.11916e-05	BEC
HLA-DRA	1.27261e-20	0.493229	0.251	0.097	3.47614e-16	BEC
SMYD3	1.15678e-12	0.493172	0.631	0.581	3.15974e-08	BEC
RBMS3	1.10771e-12	0.492482	0.578	0.459	3.02571e-08	BEC
CUX1	2.81823e-11	0.491708	0.702	0.599	7.69799e-07	BEC
CASP4	2.00568e-14	0.491541	0.326	0.184	5.47852e-10	BEC
MECOM	6.40993e-15	0.488563	0.911	0.863	1.75087e-10	BEC
PHACTR1	7.63008e-08	0.488215	0.414	0.321	0.00208416	BEC
USP24	2.51567e-12	0.487614	0.507	0.379	6.87157e-08	BEC
ZDHHC14	9.39866e-11	0.487485	0.436	0.37	2.56724e-06	BEC
LRRFIP1	2.36285e-14	0.486828	0.655	0.528	6.45411e-10	BEC
DYNC2H1	3.52165e-09	0.485052	0.352	0.276	9.61938e-05	BEC
PCSK5	4.9659e-11	0.484258	0.525	0.401	1.35644e-06	BEC
GLIS3	2.54847e-09	0.483323	0.567	0.482	6.96113e-05	BEC
HSPA8	4.08981e-08	0.483137	0.336	0.27	0.00111713	BEC
SUCLG2	3.58253e-14	0.482062	0.43	0.281	9.78567e-10	BEC
CPXM2	9.17252e-11	0.481329	0.37	0.243	2.50547e-06	BEC
IKBKB	1.85072e-12	0.480096	0.435	0.296	5.05525e-08	BEC
CABIN1	3.83695e-11	0.479776	0.272	0.167	1.04806e-06	BEC
PRKDC	1.2546e-11	0.478499	0.448	0.332	3.42695e-07	BEC
KAT6A	1.05347e-13	0.476953	0.74	0.641	2.87756e-09	BEC
ECPAS	3.45011e-11	0.475944	0.511	0.387	9.42398e-07	BEC
STX8	3.28712e-09	0.475714	0.422	0.334	8.97877e-05	BEC
DENND4C	1.22792e-14	0.473649	0.639	0.506	3.35406e-10	BEC
PITPNC1	1.03023e-06	0.47235	0.737	0.692	0.0281406	BEC
SCAPER	2.45149e-13	0.471098	0.646	0.519	6.69626e-09	BEC
CLU	2.28578e-09	0.470702	0.382	0.269	6.24361e-05	BEC
SLX4IP	4.43016e-08	0.470505	0.263	0.186	0.0012101	BEC
SDCCAG8	5.43144e-10	0.469838	0.506	0.415	1.4836e-05	BEC
DYM	7.96291e-17	0.469382	0.681	0.564	2.17507e-12	BEC
UCK2	2.02175e-14	0.469181	0.258	0.129	5.52242e-10	BEC
DDX10	2.20331e-08	0.46636	0.34	0.249	0.000601834	BEC
PODXL	4.06829e-11	0.46409	0.421	0.29	1.11125e-06	BEC
CDK8	8.21164e-09	0.46322	0.337	0.254	0.000224301	BEC
KIAA1217	7.51956e-07	0.462661	0.535	0.481	0.0205397	BEC
RNF144A	6.1841e-07	0.460796	0.433	0.337	0.0168919	BEC
ZBTB16	4.99349e-12	0.460355	0.827	0.717	1.36397e-07	BEC
HSD17B4	5.53728e-14	0.459186	0.312	0.175	1.51251e-09	BEC
SUMF1	1.41537e-07	0.458019	0.32	0.249	0.00386609	BEC
PIK3C2A	5.30407e-13	0.457942	0.643	0.538	1.44881e-08	BEC
GRK5	2.93893e-10	0.457765	0.687	0.569	8.02767e-06	BEC
RFX2	1.47207e-09	0.454763	0.258	0.163	4.02097e-05	BEC
RBM26	2.54015e-12	0.453543	0.529	0.389	6.93842e-08	BEC
MAP3K3	6.51943e-10	0.449191	0.468	0.362	1.78078e-05	BEC
NAA25	2.29082e-10	0.448613	0.327	0.212	6.25736e-06	BEC
MKL2	3.5525e-18	0.447174	0.762	0.611	9.70364e-14	BEC
PUS7	1.57931e-13	0.447136	0.284	0.151	4.31389e-09	BEC
ABR	2.77995e-07	0.445999	0.474	0.37	0.00759342	BEC
KCNN3	2.61976e-08	0.444166	0.354	0.242	0.000715588	BEC
VTI1A	4.33901e-10	0.443989	0.597	0.528	1.1852e-05	BEC
BCL6	5.86807e-08	0.443229	0.302	0.213	0.00160286	BEC
UGP2	5.28467e-11	0.441161	0.27	0.158	1.44351e-06	BEC
SUN1	8.08243e-10	0.440859	0.446	0.326	2.20772e-05	BEC
LRBA	7.06339e-12	0.440406	0.62	0.533	1.92937e-07	BEC
FARS2	7.87082e-09	0.437653	0.446	0.367	0.000214992	BEC
RSU1	1.22438e-08	0.437524	0.397	0.294	0.00033444	BEC
UVRAG	2.18511e-11	0.434842	0.62	0.508	5.96861e-07	BEC
ICA1	1.10857e-11	0.433596	0.299	0.172	3.02806e-07	BEC
MYOF	2.15769e-11	0.433221	0.582	0.442	5.89373e-07	BEC
RICTOR	1.50113e-12	0.433166	0.595	0.454	4.10033e-08	BEC
PPP2R5E	1.43178e-09	0.431932	0.479	0.379	3.9109e-05	BEC
CARMIL1	3.14857e-08	0.431321	0.499	0.431	0.000860032	BEC
ECE1	3.6879e-11	0.430358	0.545	0.422	1.00735e-06	BEC
USP31	4.84104e-08	0.428758	0.283	0.187	0.00132233	BEC
SNX9	1.13341e-09	0.427863	0.489	0.388	3.0959e-05	BEC
WSB1	5.42047e-11	0.426953	0.614	0.492	1.4806e-06	BEC
USP25	6.05171e-12	0.426404	0.531	0.398	1.65303e-07	BEC
RALGAPA1	1.32769e-13	0.425193	0.688	0.55	3.62658e-09	BEC
TBCD	2.03295e-09	0.42446	0.536	0.412	5.55301e-05	BEC
IGF1R	8.66546e-13	0.424298	0.738	0.619	2.36697e-08	BEC
PDLIM1	4.01496e-14	0.423101	0.482	0.314	1.09669e-09	BEC
EEFSEC	2.19945e-11	0.422881	0.26	0.144	6.00779e-07	BEC
CAMK1D	1.2629e-06	0.422771	0.338	0.276	0.0344961	BEC
IRAK3	1.59119e-10	0.421656	0.602	0.472	4.34635e-06	BEC
NEK7	2.27404e-10	0.421127	0.507	0.382	6.21154e-06	BEC
PIK3CB	2.80833e-09	0.420209	0.366	0.255	7.67094e-05	BEC
EVA1C	2.67084e-09	0.419129	0.564	0.447	7.29539e-05	BEC
P4HA1	9.97798e-07	0.418249	0.682	0.573	0.0272548	BEC
TRIM44	3.37419e-09	0.417291	0.497	0.382	9.21661e-05	BEC
SBF2	9.64841e-12	0.417	0.791	0.744	2.63546e-07	BEC
KDM3A	1.33182e-09	0.416801	0.331	0.217	3.63787e-05	BEC
ATP11C	7.83645e-08	0.416679	0.518	0.42	0.00214053	BEC
ASCC3	6.62921e-09	0.415943	0.457	0.364	0.000181077	BEC
WTAP	1.47646e-07	0.41577	0.337	0.258	0.00403296	BEC
MYCBP2	3.17639e-13	0.414405	0.737	0.659	8.67631e-09	BEC
VPS13C	1.26879e-09	0.414133	0.589	0.487	3.46569e-05	BEC
TTC37	1.45183e-07	0.413661	0.394	0.307	0.00396567	BEC
STX7	5.47091e-11	0.413613	0.279	0.178	1.49438e-06	BEC
KMT2E	1.41671e-11	0.413501	0.816	0.767	3.86975e-07	BEC
ZEB1	8.13777e-17	0.413227	0.831	0.727	2.22283e-12	BEC
SYNJ2	1.46532e-08	0.411774	0.27	0.168	0.000400252	BEC
ANKRD36	4.93725e-12	0.410633	0.415	0.274	1.34861e-07	BEC
PRKCH	1.04228e-13	0.408633	0.783	0.699	2.84698e-09	BEC
TMEM135	9.53492e-08	0.408271	0.535	0.453	0.00260446	BEC
MYO9A	4.80842e-09	0.407225	0.586	0.519	0.000131342	BEC
GPD2	2.9188e-08	0.407218	0.283	0.18	0.000797269	BEC
DGLUCY	4.22304e-10	0.406021	0.344	0.217	1.15352e-05	BEC
EHBP1L1	6.28424e-12	0.4055	0.258	0.136	1.71654e-07	BEC
CFLAR	1.20637e-11	0.404017	0.702	0.584	3.29521e-07	BEC
OGA	7.31137e-09	0.402397	0.589	0.478	0.00019971	BEC
RNF149	1.56665e-08	0.401546	0.383	0.277	0.00042793	BEC
ATP9B	2.23227e-09	0.401225	0.479	0.369	6.09745e-05	BEC
DNAJC1	3.69816e-07	0.400066	0.446	0.382	0.0101015	BEC
SNX25	1.50455e-07	0.398845	0.529	0.446	0.00410969	BEC
PRKRIP1	4.45722e-07	0.398121	0.301	0.221	0.0121749	BEC
DLG1	3.23431e-08	0.397303	0.585	0.492	0.000883451	BEC
SPG11	2.08321e-10	0.394285	0.411	0.279	5.6903e-06	BEC
ADK	9.99517e-07	0.394118	0.37	0.294	0.0273018	BEC
GNAI2	1.67136e-06	0.393778	0.376	0.283	0.0456532	BEC
CLIC2	3.45462e-11	0.393449	0.465	0.318	9.43631e-07	BEC
WRN	8.14772e-07	0.391118	0.387	0.318	0.0222555	BEC
AC139887.2	7.73219e-08	0.389759	0.301	0.207	0.00211205	BEC
STK38	4.16602e-07	0.388033	0.33	0.248	0.0113795	BEC
IQGAP1	8.89944e-09	0.386912	0.536	0.449	0.000243088	BEC
C1RL	5.1461e-15	0.386608	0.253	0.119	1.40566e-10	BEC
ATP2B4	3.73997e-08	0.385447	0.407	0.306	0.00102157	BEC
FAR1	1.90396e-08	0.384273	0.458	0.356	0.000520067	BEC
GNAQ	1.80974e-13	0.384139	0.864	0.802	4.94332e-09	BEC
TNS2	2.16738e-15	0.383939	0.299	0.152	5.92019e-11	BEC
WASF2	1.29463e-06	0.381466	0.521	0.437	0.0353627	BEC
MID1	1.32237e-06	0.380874	0.43	0.329	0.0361204	BEC
XPO1	5.73338e-12	0.379856	0.677	0.525	1.56607e-07	BEC
WWOX	1.20831e-08	0.379788	0.499	0.531	0.00033005	BEC
MLXIP	8.38012e-07	0.378899	0.266	0.184	0.0228903	BEC
RERE	2.62094e-10	0.378688	0.776	0.736	7.15909e-06	BEC
EIF4G3	3.6656e-09	0.378296	0.721	0.667	0.000100126	BEC
USP53	1.64924e-07	0.376644	0.442	0.346	0.00450489	BEC
ARID4B	1.73416e-08	0.376339	0.716	0.644	0.000473686	BEC
FERMT2	2.66344e-07	0.375888	0.453	0.353	0.00727519	BEC
MAP4	1.98738e-10	0.371819	0.62	0.5	5.42854e-06	BEC
EXOC4	2.37677e-09	0.368723	0.717	0.674	6.49216e-05	BEC
HERC1	3.16299e-08	0.3685	0.639	0.532	0.00086397	BEC
MDN1	4.41159e-08	0.366455	0.347	0.236	0.00120503	BEC
CPNE8	1.37493e-10	0.366076	0.638	0.517	3.75563e-06	BEC
ELMO1	7.38067e-14	0.365262	0.829	0.753	2.01603e-09	BEC
CDC27	1.21124e-08	0.364175	0.546	0.444	0.000330851	BEC
MAP3K1	1.89064e-09	0.363728	0.318	0.197	5.16429e-05	BEC
IRF2	2.828e-07	0.363559	0.362	0.278	0.00772468	BEC
PLSCR1	8.3958e-07	0.363084	0.518	0.421	0.0229331	BEC
BTBD7	1.9842e-07	0.362945	0.409	0.312	0.00541983	BEC
LAMA5	3.18781e-08	0.361036	0.318	0.208	0.000870752	BEC
RBPMS	9.30522e-07	0.360369	0.714	0.612	0.0254172	BEC
NCOA7	3.97358e-07	0.358585	0.655	0.556	0.0108538	BEC
AGPAT4	8.60898e-07	0.357864	0.273	0.185	0.0235154	BEC
JAM2	7.31317e-10	0.357109	0.357	0.228	1.99759e-05	BEC
TYW1	1.74436e-06	0.357005	0.34	0.259	0.0476473	BEC
ZCCHC7	1.46313e-06	0.355892	0.613	0.574	0.0399655	BEC
TTC27	1.39178e-08	0.355569	0.319	0.211	0.000380165	BEC
INO80	1.69709e-06	0.355145	0.359	0.262	0.0463561	BEC
VGLL4	1.14791e-07	0.354462	0.557	0.464	0.00313551	BEC
IBTK	6.64941e-07	0.353593	0.295	0.204	0.0181629	BEC
TNXB	5.56716e-08	0.352732	0.302	0.203	0.00152067	BEC
NSF	2.225e-10	0.352339	0.313	0.189	6.07759e-06	BEC
FAM120A	2.85393e-08	0.35109	0.492	0.373	0.00077955	BEC
AKAP13	3.91433e-07	0.350379	0.642	0.58	0.010692	BEC
CEP192	1.69472e-07	0.34979	0.33	0.225	0.00462913	BEC
XIST	1.18926e-12	0.349525	0.873	0.824	3.24847e-08	BEC
TNRC6A	9.75049e-08	0.348934	0.592	0.512	0.00266335	BEC
MAPK14	1.14434e-07	0.348349	0.409	0.293	0.00312577	BEC
TDRD10	6.86077e-07	0.347761	0.318	0.221	0.0187402	BEC
TFG	1.37802e-08	0.346518	0.343	0.231	0.000376406	BEC
ZBTB20	1.11233e-10	0.345232	0.911	0.878	3.03832e-06	BEC
RABGAP1L	2.16185e-07	0.343612	0.578	0.561	0.0059051	BEC
SRSF4	1.24035e-06	0.342903	0.494	0.394	0.0338803	BEC
GRB10	1.0897e-08	0.340676	0.755	0.664	0.000297651	BEC
LRP5	3.13561e-08	0.33751	0.26	0.161	0.000856492	BEC
TTC14	1.67765e-07	0.333674	0.351	0.242	0.00458251	BEC
TCF12	7.96212e-08	0.33069	0.822	0.788	0.00217485	BEC
ZNF521	7.67167e-07	0.327555	0.611	0.557	0.0209552	BEC
COG5	3.3574e-07	0.322227	0.532	0.469	0.00917073	BEC
MKLN1	7.89615e-09	0.321962	0.783	0.712	0.000215683	BEC
SPIDR	5.41837e-07	0.318732	0.717	0.684	0.0148003	BEC
TOP2B	1.58697e-07	0.317944	0.369	0.259	0.00433481	BEC
BIRC6	2.77742e-08	0.317785	0.745	0.692	0.000758652	BEC
KLHL2	1.32871e-06	0.312418	0.336	0.242	0.0362938	BEC
IPO7	6.79771e-07	0.312147	0.337	0.234	0.0185679	BEC
NUMB	1.81372e-08	0.309602	0.603	0.496	0.000495417	BEC
RNF217	1.04846e-06	0.304519	0.485	0.375	0.0286386	BEC
BMPR2	1.77147e-06	0.30287	0.714	0.667	0.0483877	BEC
CDK17	1.33324e-06	0.299227	0.682	0.599	0.0364176	BEC
SSH1	1.28565e-06	0.296727	0.437	0.333	0.0351176	BEC
INTS3	4.11231e-08	0.296554	0.301	0.193	0.00112328	BEC
ATP10D	2.28185e-07	0.29383	0.336	0.229	0.00623287	BEC
THOC1	8.96643e-08	0.292636	0.265	0.163	0.00244918	BEC
FUBP1	5.78573e-07	0.28554	0.51	0.397	0.0158037	BEC
MRPS31	1.07207e-06	0.28424	0.253	0.167	0.0292836	BEC
KIAA1468	1.07245e-06	0.283835	0.352	0.249	0.0292938	BEC
MLLT10	9.6138e-07	0.272562	0.685	0.607	0.0262601	BEC
TUBB6	1.44303e-07	0.251491	0.252	0.154	0.00394164	BEC
RPL13A	1.24578e-08	-0.270026	0.464	0.594	0.000340285	BEC
ZSWIM6	8.96446e-07	-0.271021	0.432	0.544	0.0244864	BEC
COL4A1	7.55073e-09	-0.287461	0.29	0.418	0.000206248	BEC
AFF3	2.03454e-14	-0.294031	0.134	0.273	5.55736e-10	BEC
NCALD	5.23067e-16	-0.295612	0.127	0.263	1.42876e-11	BEC
DYSF	3.97236e-08	-0.301991	0.318	0.443	0.00108505	BEC
ATRX	2.01464e-08	-0.30854	0.701	0.717	0.000550298	BEC
TPST1	1.83859e-10	-0.30939	0.184	0.312	5.02211e-06	BEC
HSPE1-MOB4	1.46916e-11	-0.310457	0.338	0.311	4.01301e-07	BEC
SOS1	1.17861e-07	-0.310957	0.623	0.706	0.00321938	BEC
EGFR	4.03765e-14	-0.31466	0.247	0.408	1.10289e-09	BEC
CD81	3.56617e-07	-0.318851	0.219	0.326	0.00974101	BEC
SPTBN1	7.90528e-10	-0.320552	0.702	0.772	2.15933e-05	BEC
RPL28	1.53826e-12	-0.320694	0.437	0.596	4.20175e-08	BEC
LUC7L3	2.77169e-07	-0.322912	0.5	0.568	0.00757086	BEC
MALAT1	8.02438e-15	-0.324182	0.99	0.997	2.19186e-10	BEC
EXT1	1.06526e-06	-0.324778	0.528	0.641	0.0290975	BEC
ATF7IP2	9.96515e-08	-0.324864	0.169	0.273	0.00272198	BEC
HSPD1	1.01492e-07	-0.325743	0.624	0.545	0.00277224	BEC
LMBR1	3.57909e-11	-0.33038	0.476	0.627	9.77627e-07	BEC
PRMT2	1.79732e-08	-0.330718	0.23	0.349	0.000490937	BEC
ATN1	1.31812e-06	-0.346779	0.178	0.262	0.0360043	BEC
NUTM2A-AS1	7.71741e-07	-0.349708	0.411	0.496	0.0210801	BEC
CDK14	1.42623e-06	-0.351612	0.284	0.392	0.0389574	BEC
PRRC2C	6.9037e-08	-0.353057	0.578	0.63	0.00188575	BEC
MSI2	9.01595e-09	-0.360783	0.536	0.639	0.000246271	BEC
PCF11	8.7743e-08	-0.361199	0.188	0.279	0.0023967	BEC
UPF2	1.06291e-07	-0.362511	0.245	0.354	0.00290335	BEC
MBOAT2	7.12957e-07	-0.36463	0.185	0.282	0.0194744	BEC
B2M	1.29537e-10	-0.369354	0.708	0.783	3.53829e-06	BEC
OSBPL1A	1.06775e-07	-0.372606	0.597	0.596	0.00291656	BEC
COL4A2	4.47724e-08	-0.37304	0.338	0.464	0.00122296	BEC
NOSTRIN	9.29673e-08	-0.373741	0.32	0.442	0.0025394	BEC
PNN	1.64213e-07	-0.374288	0.166	0.254	0.00448548	BEC
LPCAT2	6.60471e-08	-0.376157	0.265	0.381	0.00180408	BEC
ATP2C1	1.73971e-07	-0.376183	0.377	0.429	0.00475202	BEC
XAF1	6.20442e-09	-0.377044	0.334	0.464	0.000169474	BEC
ELOVL5	1.21058e-06	-0.378618	0.375	0.445	0.033067	BEC
AP001528.2	1.05081e-09	-0.379013	0.15	0.267	2.87029e-05	BEC
SPIN1	1.39291e-07	-0.381427	0.291	0.364	0.00380474	BEC
SON	3.55774e-08	-0.381712	0.43	0.527	0.000971797	BEC
PAWR	1.80678e-07	-0.382505	0.305	0.382	0.00493523	BEC
PAPOLA	9.23714e-10	-0.383589	0.521	0.554	2.52313e-05	BEC
MCC	4.33954e-07	-0.384105	0.591	0.624	0.0118535	BEC
CRIM1	3.25913e-08	-0.386574	0.733	0.784	0.000890232	BEC
RBBP6	1.03722e-06	-0.388253	0.227	0.313	0.0283316	BEC
YWHAQ	1.00736e-08	-0.389632	0.187	0.297	0.000275162	BEC
ZNF160	2.72952e-07	-0.392018	0.252	0.337	0.00745569	BEC
AFAP1L2	4.47513e-08	-0.392637	0.192	0.292	0.00122238	BEC
UBA52	1.04444e-06	-0.393955	0.259	0.363	0.028529	BEC
ENAH	5.06491e-14	-0.395079	0.297	0.464	1.38348e-09	BEC
FSTL1	1.85414e-07	-0.396761	0.235	0.325	0.00506458	BEC
IGFBP5	1.31702e-18	-0.399294	0.217	0.403	3.59743e-14	BEC
CGGBP1	2.35638e-08	-0.403213	0.194	0.294	0.000643645	BEC
NAA16	1.83425e-07	-0.405816	0.364	0.437	0.00501025	BEC
SPRED2	4.38419e-08	-0.407218	0.265	0.382	0.00119754	BEC
ANGPT2	5.09821e-10	-0.408559	0.306	0.447	1.39258e-05	BEC
ZNF638	6.98843e-14	-0.410308	0.728	0.759	1.90889e-09	BEC
HERC4	9.87838e-09	-0.412487	0.642	0.664	0.000269828	BEC
PLSCR4	9.03211e-08	-0.413479	0.511	0.607	0.00246712	BEC
LINC01004	1.22622e-11	-0.416392	0.223	0.364	3.34942e-07	BEC
PLEKHA5	3.68266e-07	-0.416624	0.4	0.475	0.0100592	BEC
MARCKS	3.85476e-08	-0.416799	0.166	0.269	0.00105293	BEC
PRKD2	1.25931e-06	-0.419046	0.291	0.369	0.034398	BEC
PXDN	7.03448e-12	-0.420188	0.152	0.282	1.92147e-07	BEC
NUCB1	1.39185e-07	-0.423883	0.251	0.327	0.00380185	BEC
TENT4B	9.57111e-08	-0.428863	0.217	0.309	0.00261435	BEC
AEBP2	4.75968e-08	-0.429052	0.377	0.471	0.00130011	BEC
PGAP1	2.86147e-07	-0.429488	0.178	0.269	0.0078161	BEC
TGFBR2	4.11641e-07	-0.431208	0.656	0.652	0.011244	BEC
PRKCA	6.17814e-13	-0.433813	0.203	0.352	1.68756e-08	BEC
SMARCA2	2.70327e-08	-0.4387	0.593	0.662	0.000738398	BEC
SRP14	2.28862e-09	-0.439097	0.175	0.291	6.25137e-05	BEC
SORBS2	1.61878e-11	-0.443218	0.247	0.392	4.42169e-07	BEC
MAP3K5	3.38253e-08	-0.443333	0.38	0.417	0.000923939	BEC
COL6A2	1.07933e-14	-0.449909	0.127	0.269	2.94819e-10	BEC
TMEM65	1.1902e-07	-0.450363	0.231	0.336	0.00325104	BEC
SERPINH1	8.42773e-09	-0.45102	0.398	0.439	0.000230203	BEC
RUNDC3B	1.40154e-11	-0.451191	0.162	0.292	3.82829e-07	BEC
PCBP1	2.41279e-13	-0.453997	0.13	0.263	6.59053e-09	BEC
MAP1LC3B	5.10047e-10	-0.454553	0.136	0.251	1.39319e-05	BEC
SKP1	2.39854e-07	-0.454794	0.169	0.254	0.0065516	BEC
MGAT4A	6.85306e-08	-0.455981	0.366	0.479	0.00187191	BEC
DIP2B	9.6008e-10	-0.460631	0.547	0.598	2.62246e-05	BEC
CNOT6L	8.03645e-08	-0.462211	0.447	0.547	0.00219516	BEC
TIMP2	7.35173e-14	-0.463673	0.354	0.503	2.00812e-09	BEC
MPHOSPH8	1.82333e-10	-0.464494	0.334	0.412	4.98044e-06	BEC
DCN	1.2648e-10	-0.465598	0.331	0.462	3.45479e-06	BEC
SEM1	1.1519e-09	-0.466805	0.269	0.386	3.14641e-05	BEC
DPH6-DT	1.88448e-07	-0.46778	0.226	0.331	0.00514744	BEC
CST3	3.35011e-08	-0.469215	0.184	0.29	0.000915083	BEC
NUFIP2	4.99895e-10	-0.47257	0.409	0.488	1.36546e-05	BEC
CAVIN2	7.15756e-08	-0.472718	0.231	0.299	0.00195509	BEC
FP236383.1	5.90008e-07	-0.473366	0.666	0.62	0.0161161	BEC
RPS8	4.6515e-11	-0.473792	0.412	0.557	1.27056e-06	BEC
AUTS2	1.21557e-14	-0.474582	0.465	0.619	3.32032e-10	BEC
FEZ2	2.01725e-07	-0.476262	0.287	0.379	0.00551011	BEC
CALD1	2.06701e-15	-0.48076	0.595	0.655	5.64604e-11	BEC
APLP2	6.45276e-12	-0.482364	0.238	0.372	1.76257e-07	BEC
TUBA1B	8.32603e-10	-0.483652	0.153	0.257	2.27425e-05	BEC
EXOC6	3.08295e-19	-0.48452	0.677	0.807	8.42108e-15	BEC
GOLGB1	9.84642e-10	-0.486082	0.22	0.327	2.68955e-05	BEC
RPS15	3.55416e-11	-0.486202	0.38	0.526	9.70819e-07	BEC
NR2F1-AS1	1.92451e-12	-0.487632	0.191	0.327	5.25679e-08	BEC
GNG11	1.4256e-18	-0.48948	0.124	0.286	3.89402e-14	BEC
SLC38A2	1.06374e-13	-0.489769	0.397	0.506	2.9056e-09	BEC
IRF2BP2	5.58334e-13	-0.490355	0.231	0.369	1.52509e-08	BEC
NFATC3	3.7598e-09	-0.490833	0.428	0.46	0.000102699	BEC
FHL2	2.03907e-14	-0.49348	0.13	0.271	5.56971e-10	BEC
FKBP5	2.43154e-10	-0.495078	0.536	0.579	6.64176e-06	BEC
SNAP23	1.11003e-09	-0.495218	0.524	0.51	3.03204e-05	BEC
ZNF516	5.90356e-10	-0.49569	0.266	0.351	1.61256e-05	BEC
SMARCA1	3.50679e-12	-0.498717	0.166	0.294	9.57879e-08	BEC
CCT4	5.20776e-13	-0.499342	0.358	0.401	1.4225e-08	BEC
MAML2	2.22107e-10	-0.504047	0.476	0.597	6.06685e-06	BEC
SCARB1	2.80801e-12	-0.505124	0.297	0.451	7.67009e-08	BEC
ZFPM2	6.13021e-09	-0.505434	0.55	0.632	0.000167447	BEC
PALLD	2.52523e-12	-0.506349	0.166	0.3	6.89766e-08	BEC
ZFP36L1	3.49943e-15	-0.506555	0.483	0.615	9.5587e-11	BEC
ITM2B	1.17988e-11	-0.506602	0.479	0.599	3.22284e-07	BEC
BST2	1.43047e-15	-0.507906	0.245	0.417	3.90734e-11	BEC
HMGB1	1.95436e-12	-0.510158	0.344	0.457	5.33833e-08	BEC
GJA1	2.14671e-12	-0.512418	0.156	0.287	5.86373e-08	BEC
OOEP	3.84953e-08	-0.513162	0.173	0.275	0.0010515	BEC
RPL29	2.25057e-10	-0.513265	0.33	0.466	6.14744e-06	BEC
CCDC178	8.55781e-24	-0.518909	0.217	0.426	2.33757e-19	BEC
SH3KBP1	2.47303e-11	-0.519508	0.139	0.259	6.75508e-07	BEC
RYBP	5.59734e-10	-0.519912	0.244	0.342	1.52891e-05	BEC
EIF1	9.32923e-13	-0.520641	0.301	0.433	2.54828e-08	BEC
RPL14	8.5127e-07	-0.521307	0.288	0.377	0.0232524	BEC
LGALS1	2.72912e-10	-0.525359	0.157	0.278	7.45459e-06	BEC
SRRM2	2.3549e-14	-0.528487	0.409	0.516	6.43241e-10	BEC
LIMCH1	6.70288e-10	-0.530271	0.666	0.734	1.83089e-05	BEC
PALMD	2.91853e-10	-0.533756	0.355	0.491	7.97195e-06	BEC
RPL13	2.17913e-22	-0.535132	0.597	0.774	5.9523e-18	BEC
RPS2	6.09462e-09	-0.537259	0.297	0.403	0.000166474	BEC
CCT3	5.03034e-14	-0.5393	0.146	0.268	1.37404e-09	BEC
ADGRG6	2.19564e-08	-0.544195	0.238	0.284	0.00059974	BEC
C17orf67	2.18123e-14	-0.547031	0.182	0.312	5.95804e-10	BEC
SPARCL1	1.24376e-08	-0.548907	0.774	0.788	0.000339732	BEC
RPL3	1.152e-09	-0.549295	0.347	0.475	3.14669e-05	BEC
KCNQ1OT1	8.15089e-13	-0.550539	0.162	0.29	2.22642e-08	BEC
PSAP	7.42602e-12	-0.550859	0.295	0.417	2.02842e-07	BEC
RPS7	4.90084e-09	-0.550971	0.251	0.364	0.000133866	BEC
PPARG	5.59208e-18	-0.552688	0.315	0.503	1.52748e-13	BEC
LHFPL6	1.97855e-14	-0.553426	0.571	0.709	5.40442e-10	BEC
HNRNPU	1.56249e-15	-0.554866	0.616	0.673	4.26795e-11	BEC
RPL18	3.20798e-09	-0.557332	0.313	0.434	8.7626e-05	BEC
KDM5A	5.63482e-15	-0.561069	0.29	0.41	1.53915e-10	BEC
BTG1	9.21042e-17	-0.561201	0.263	0.441	2.51583e-12	BEC
OSBPL3	1.62608e-10	-0.561705	0.22	0.326	4.44163e-06	BEC
P3H2	3.11336e-12	-0.562058	0.135	0.262	8.50415e-08	BEC
TOX	1.64984e-09	-0.5652	0.145	0.257	4.50653e-05	BEC
COL19A1	6.91347e-17	-0.568983	0.146	0.285	1.88841e-12	BEC
RPS29	2.51237e-10	-0.569063	0.217	0.323	6.86253e-06	BEC
DNAJB6	2.48739e-19	-0.569363	0.564	0.581	6.79431e-15	BEC
CACNB2	6.47994e-14	-0.572652	0.13	0.267	1.77e-09	BEC
PBX3	1.68746e-09	-0.572741	0.283	0.398	4.6093e-05	BEC
RPL11	2.46652e-09	-0.573341	0.38	0.469	6.73729e-05	BEC
MAP2	1.45248e-16	-0.577573	0.235	0.412	3.96746e-12	BEC
IVNS1ABP	4.57589e-17	-0.577749	0.237	0.417	1.2499e-12	BEC
CLDN5	8.49177e-15	-0.579231	0.333	0.503	2.31953e-10	BEC
SYNPO2	1.51742e-14	-0.580898	0.116	0.253	4.14485e-10	BEC
FOSL2	3.06194e-15	-0.583216	0.358	0.508	8.36369e-11	BEC
PDCD4	2.83461e-08	-0.584936	0.337	0.449	0.000774273	BEC
NID1	4.17833e-11	-0.589286	0.21	0.316	1.14131e-06	BEC
SERF2	3.43161e-11	-0.593033	0.228	0.335	9.37343e-07	BEC
AHCTF1	1.52669e-14	-0.59468	0.44	0.549	4.17015e-10	BEC
RPL35A	2.26713e-08	-0.594714	0.24	0.344	0.000619267	BEC
TIMP3	5.22476e-12	-0.595932	0.458	0.614	1.42714e-07	BEC
HSP90AB1	8.36586e-18	-0.601547	0.659	0.684	2.28514e-13	BEC
JUN	8.26356e-13	-0.603742	0.233	0.356	2.25719e-08	BEC
COL6A3	4.07333e-16	-0.605042	0.109	0.253	1.11263e-11	BEC
ZNF83	6.50402e-17	-0.612411	0.474	0.522	1.77657e-12	BEC
RPS19	4.59275e-13	-0.615362	0.416	0.556	1.25451e-08	BEC
COL6A1	6.73518e-14	-0.619638	0.152	0.284	1.83971e-09	BEC
MCU	2.62461e-13	-0.621333	0.383	0.497	7.16913e-09	BEC
CPEB4	3.77637e-11	-0.622085	0.217	0.35	1.03151e-06	BEC
BNC2	7.70227e-13	-0.62237	0.506	0.582	2.10387e-08	BEC
RPL7A	2.89482e-09	-0.624267	0.266	0.367	7.90721e-05	BEC
FXR1	4.06343e-24	-0.625841	0.593	0.594	1.10993e-19	BEC
SESN3	9.05508e-14	-0.628919	0.478	0.556	2.47339e-09	BEC
S100A6	5.80953e-09	-0.630021	0.223	0.298	0.000158687	BEC
PTMS	4.79031e-18	-0.633459	0.223	0.384	1.30847e-13	BEC
EIF2AK2	1.56334e-17	-0.633693	0.231	0.391	4.27026e-13	BEC
HSPA4	8.17551e-20	-0.635489	0.425	0.433	2.23314e-15	BEC
TMCC3	5.49646e-10	-0.637998	0.298	0.412	1.50136e-05	BEC
LAPTM4A	1.97818e-21	-0.639972	0.157	0.336	5.40341e-17	BEC
TSC22D1	1.93081e-16	-0.640837	0.426	0.557	5.27401e-12	BEC
NREP	7.48837e-15	-0.645735	0.127	0.268	2.04545e-10	BEC
FP671120.1	2.56163e-23	-0.648077	0.733	0.74	6.9971e-19	BEC
MYO1B	3.41602e-20	-0.650298	0.097	0.259	9.33085e-16	BEC
TCEAL4	3.07589e-19	-0.650403	0.124	0.288	8.40179e-15	BEC
BEX3	3.78697e-22	-0.651048	0.102	0.268	1.03441e-17	BEC
RPL10A	4.34016e-09	-0.653195	0.256	0.327	0.000118552	BEC
NAV3	6.49666e-17	-0.655348	0.386	0.564	1.77456e-12	BEC
TNS3	1.86627e-18	-0.657189	0.134	0.294	5.09771e-14	BEC
CHRM3	1.28788e-12	-0.659849	0.125	0.254	3.51785e-08	BEC
GRAMD1B	1.17217e-16	-0.6672	0.11	0.258	3.20179e-12	BEC
AC073050.1	1.49993e-14	-0.667847	0.117	0.253	4.09707e-10	BEC
HTRA1	1.35496e-23	-0.670721	0.088	0.251	3.70108e-19	BEC
RPL10	1.60214e-09	-0.67109	0.419	0.496	4.37624e-05	BEC
PPP2CB	4.72179e-17	-0.674286	0.249	0.395	1.28976e-12	BEC
ARHGAP5	4.6319e-17	-0.675259	0.376	0.516	1.2652e-12	BEC
CLIP2	1.26319e-14	-0.678198	0.163	0.282	3.45041e-10	BEC
BICC1	4.38223e-15	-0.681527	0.123	0.258	1.19701e-10	BEC
MYL6	5.85432e-13	-0.684678	0.226	0.349	1.59911e-08	BEC
TBC1D4	1.08894e-21	-0.684736	0.358	0.552	2.97443e-17	BEC
FAU	6.13377e-12	-0.6876	0.159	0.261	1.67544e-07	BEC
PNISR	1.13566e-27	-0.693226	0.6	0.683	3.10206e-23	BEC
RPL41	8.39827e-12	-0.69754	0.382	0.458	2.29399e-07	BEC
MTMR10	1.05145e-13	-0.702544	0.174	0.306	2.87204e-09	BEC
RPS4X	1.36008e-12	-0.723346	0.316	0.401	3.71507e-08	BEC
KTN1	1.4582e-25	-0.72596	0.522	0.681	3.98307e-21	BEC
KANSL1L	1.54984e-24	-0.726002	0.35	0.485	4.23339e-20	BEC
ARHGAP18	4.84736e-14	-0.729602	0.175	0.309	1.32406e-09	BEC
TCEAL9	2.17991e-19	-0.729713	0.195	0.339	5.95441e-15	BEC
ALDH7A1	2.62544e-17	-0.733758	0.149	0.277	7.17139e-13	BEC
RPLP1	2.80592e-12	-0.736428	0.405	0.515	7.66438e-08	BEC
PSD3	1.82859e-15	-0.737454	0.244	0.386	4.99479e-11	BEC
CELF2	4.53229e-21	-0.740728	0.405	0.576	1.23799e-16	BEC
ABCB1	1.04104e-31	-0.745441	0.306	0.567	2.84359e-27	BEC
TMSB4X	4.29335e-20	-0.751007	0.421	0.588	1.17273e-15	BEC
ENTPD1-AS1	2.79565e-12	-0.756193	0.199	0.297	7.63633e-08	BEC
FN1	1.27566e-18	-0.762946	0.249	0.438	3.48447e-14	BEC
EPS8	9.90221e-18	-0.765673	0.281	0.412	2.70479e-13	BEC
TMSB10	6.66128e-13	-0.76774	0.355	0.491	1.81953e-08	BEC
RALGPS2	7.62009e-22	-0.784334	0.143	0.305	2.08143e-17	BEC
RPS14	6.81619e-13	-0.795539	0.241	0.357	1.86184e-08	BEC
DUSP1	1.29372e-21	-0.795766	0.309	0.484	3.5338e-17	BEC
PRSS23	5.36387e-22	-0.799491	0.252	0.449	1.46514e-17	BEC
JAM3	8.42337e-20	-0.805619	0.191	0.347	2.30084e-15	BEC
SPARC	4.15816e-34	-0.815753	0.315	0.571	1.1358e-29	BEC
VIM	4.99733e-27	-0.81943	0.56	0.712	1.36502e-22	BEC
RHOBTB3	4.92607e-25	-0.829563	0.155	0.335	1.34556e-20	BEC
VAV3	1.47143e-31	-0.837859	0.068	0.264	4.01922e-27	BEC
CHORDC1	1.25186e-33	-0.839856	0.432	0.457	3.41947e-29	BEC
RPL15	1.23117e-18	-0.841458	0.331	0.486	3.36294e-14	BEC
SUGT1	4.9633e-25	-0.842513	0.216	0.362	1.35572e-20	BEC
NRIP1	2.53528e-22	-0.847229	0.248	0.418	6.92511e-18	BEC
AC105402.3	2.93789e-27	-0.862036	0.436	0.388	8.02485e-23	BEC
PRKD1	6.3602e-31	-0.865505	0.352	0.588	1.73729e-26	BEC
MT-CO2	3.60867e-41	-0.881339	0.73	0.844	9.85709e-37	BEC
RPS18	6.92312e-19	-0.913972	0.28	0.412	1.89105e-14	BEC
PLCL1	4.66275e-26	-0.916266	0.13	0.33	1.27363e-21	BEC
MTRNR2L8	7.92838e-17	-0.918116	0.302	0.439	2.16564e-12	BEC
ADAMTS9-AS2	1.37581e-38	-0.939773	0.49	0.72	3.75803e-34	BEC
HSPA1B	3.80004e-53	-0.942085	0.684	0.607	1.03798e-48	BEC
LINC00486	4.28916e-44	-0.943816	0.409	0.632	1.17158e-39	BEC
CWF19L2	1.53921e-23	-0.946875	0.396	0.493	4.20436e-19	BEC
TSHZ1	2.01924e-26	-0.972997	0.273	0.429	5.51555e-22	BEC
RANGAP1	2.33485e-34	-0.973221	0.106	0.295	6.37763e-30	BEC
RPS23	2.97628e-15	-0.97408	0.281	0.396	8.1297e-11	BEC
LINGO1	7.32186e-38	-0.974856	0.34	0.557	1.99997e-33	BEC
CERS6	5.75683e-27	-0.978482	0.302	0.448	1.57248e-22	BEC
PDZRN3	1.54967e-25	-0.983835	0.107	0.295	4.23292e-21	BEC
RPL30	7.86163e-21	-0.991927	0.249	0.386	2.1474e-16	BEC
WT1	8.77997e-40	-0.994613	0.217	0.498	2.39825e-35	BEC
MMP16	4.96576e-28	-1.00536	0.178	0.393	1.3564e-23	BEC
HSPA4L	1.25231e-25	-1.00817	0.221	0.314	3.42069e-21	BEC
ACSM3	1.23872e-21	-1.01398	0.253	0.438	3.38357e-17	BEC
MT-ND2	2.63499e-63	-1.03071	0.493	0.788	7.19746e-59	BEC
ARL17B	1.39042e-30	-1.03514	0.109	0.259	3.79793e-26	BEC
MT-ND3	7.63638e-64	-1.03857	0.719	0.897	2.08588e-59	BEC
SLC26A3	1.20476e-38	-1.04543	0.435	0.623	3.2908e-34	BEC
MT-ND4L	5.339e-42	-1.05096	0.263	0.528	1.45835e-37	BEC
MT-ND5	1.14205e-50	-1.05357	0.4	0.657	3.11952e-46	BEC
RP1	6.28803e-68	-1.09398	0.146	0.508	1.71758e-63	BEC
TSPAN5	1.67651e-34	-1.10149	0.171	0.415	4.5794e-30	BEC
MT-CO3	6.3648e-87	-1.10949	0.67	0.909	1.73854e-82	BEC
MT-CYB	7.32869e-79	-1.13481	0.623	0.873	2.00183e-74	BEC
ABHD3	6.09392e-33	-1.13976	0.287	0.434	1.66456e-28	BEC
NEAT1	3.06596e-86	-1.14477	0.947	0.946	8.37467e-82	BEC
HIBCH	4.03735e-43	-1.17674	0.535	0.573	1.1028e-38	BEC
PTGES3	7.90167e-31	-1.18986	0.709	0.687	2.15834e-26	BEC
MIB1	3.31024e-50	-1.19218	0.521	0.664	9.04192e-46	BEC
MT-CO1	2.32677e-47	-1.20202	0.581	0.803	6.35557e-43	BEC
INO80D	2.02626e-59	-1.21666	0.521	0.714	5.53473e-55	BEC
DOCK10	5.36456e-30	-1.23271	0.088	0.264	1.46533e-25	BEC
RASGEF1B	1.84077e-61	-1.294	0.593	0.751	5.02806e-57	BEC
IGFBP7	4.10731e-58	-1.29769	0.481	0.748	1.12191e-53	BEC
MT-ND4	2.15947e-94	-1.32406	0.63	0.887	5.89861e-90	BEC
MRC1	7.42391e-44	-1.33306	0.057	0.289	2.02784e-39	BEC
COL1A2	2.20945e-49	-1.35123	0.1	0.365	6.03511e-45	BEC
RBP1	1.72784e-31	-1.37191	0.106	0.301	4.7196e-27	BEC
DHFR	1.8014e-66	-1.37319	0.288	0.607	4.92053e-62	BEC
DCC	8.0672e-42	-1.38443	0.047	0.268	2.20356e-37	BEC
GPC6	1.50021e-40	-1.39507	0.07	0.291	4.09783e-36	BEC
MT-ATP6	1.11952e-95	-1.41035	0.677	0.908	3.05798e-91	BEC
AKAP12	3.07653e-13	-1.42078	0.248	0.381	8.40353e-09	BEC
JUND	6.04514e-76	-1.43741	0.198	0.563	1.65123e-71	BEC
GREB1	6.7273e-41	-1.43769	0.17	0.413	1.83756e-36	BEC
MT-ND1	1.52663e-94	-1.45332	0.454	0.798	4.16998e-90	BEC
MRPS6	9.20732e-67	-1.68224	0.118	0.414	2.51498e-62	BEC
APOE	2.05331e-57	-1.77582	0.056	0.334	5.60861e-53	BEC
MTRNR2L12	2.5826e-107	-1.82821	0.329	0.702	7.05437e-103	BEC
CTGF	8.12984e-73	-1.97998	0.136	0.494	2.22066e-68	BEC
KCNIP4	5.60846e-65	-2.09641	0.046	0.33	1.53195e-60	BEC
LAMA2	2.65964e-177	3.53849	0.923	0.404	7.26481e-173	GC
SYNE1	2.36959e-175	3.07127	0.846	0.276	6.47254e-171	GC
ADAMTS9-AS2	3.09375e-175	2.87831	0.894	0.56	8.45059e-171	GC
NR2F2-AS1	1.08126e-127	2.85279	0.832	0.224	2.95345e-123	GC
KAZN	3.59604e-114	2.80822	0.678	0.352	9.82258e-110	GC
PRKG1	2.34625e-83	2.71409	0.611	0.154	6.40878e-79	GC
CELF2	6.36522e-107	2.61931	0.808	0.191	1.73866e-102	GC
MOB3B	2.6722e-98	2.56559	0.702	0.22	7.29911e-94	GC
MEIS1	3.69703e-101	2.5178	0.635	0.091	1.00984e-96	GC
TENM4	6.96561e-102	2.47354	0.726	0.23	1.90266e-97	GC
BNC2	3.68637e-141	2.45583	0.904	0.714	1.00693e-136	GC
RARRES1	4.07642e-53	2.35341	0.399	0.1	1.11347e-48	GC
CACNB2	6.18078e-97	2.33539	0.784	0.462	1.68828e-92	GC
GLIS3	1.37591e-86	2.27166	0.668	0.22	3.75829e-82	GC
SETBP1	2.0776e-88	2.25478	0.663	0.118	5.67495e-84	GC
NAMPT	1.14711e-45	2.23037	0.457	0.288	3.13333e-41	GC
GALNT17	5.09472e-66	2.13356	0.611	0.235	1.39162e-61	GC
SSBP2	8.37721e-94	2.12183	0.812	0.423	2.28823e-89	GC
CPED1	9.7137e-85	2.11758	0.683	0.249	2.6533e-80	GC
NPAS3	2.47722e-67	2.07822	0.644	0.311	6.76653e-63	GC
ELL2	7.13136e-45	2.07673	0.495	0.25	1.94793e-40	GC
SLC24A3	2.11581e-57	2.06283	0.399	0.085	5.77933e-53	GC
STXBP5L	1.57982e-78	2.0383	0.524	0.115	4.31527e-74	GC
DLG2	6.70159e-76	2.03764	0.697	0.486	1.83054e-71	GC
TMOD1	3.42902e-60	2.03466	0.5	0.098	9.36638e-56	GC
TMEM132C	3.48895e-66	2.02257	0.442	0.059	9.53006e-62	GC
NAV3	1.26847e-46	2.00858	0.635	0.307	3.46482e-42	GC
INPP4B	9.42227e-54	1.98312	0.514	0.311	2.57369e-49	GC
MUM1L1	1.86135e-69	1.97781	0.654	0.227	5.08427e-65	GC
ROR2	6.95757e-66	1.96159	0.548	0.142	1.90046e-61	GC
SYNPO2	3.03908e-56	1.92702	0.591	0.196	8.30124e-52	GC
NLGN4X	2.26758e-41	1.91483	0.505	0.179	6.19389e-37	GC
EPHA6	3.35171e-44	1.91384	0.462	0.159	9.1552e-40	GC
PBX3	4.30148e-54	1.91042	0.688	0.41	1.17495e-49	GC
DPYD	3.54905e-103	1.89362	0.798	0.455	9.69422e-99	GC
PTGIS	1.36844e-41	1.86889	0.452	0.144	3.7379e-37	GC
TRPS1	1.25863e-57	1.84211	0.514	0.145	3.43793e-53	GC
RBPMS	4.7043e-58	1.83021	0.764	0.419	1.28498e-53	GC
ZBTB16	4.53096e-54	1.81818	0.812	0.691	1.23763e-49	GC
LINC01088	5.42235e-41	1.81761	0.317	0.067	1.48111e-36	GC
MEG3	4.43411e-68	1.8061	0.553	0.107	1.21118e-63	GC
NCAM1	2.45485e-48	1.79929	0.611	0.298	6.70544e-44	GC
SCN7A	6.26983e-60	1.79756	0.505	0.09	1.71261e-55	GC
EFNA5	2.17979e-36	1.78896	0.341	0.138	5.95409e-32	GC
MEIS2	9.48105e-65	1.783	0.663	0.397	2.58975e-60	GC
AKAP12	4.19584e-50	1.78251	0.558	0.214	1.14609e-45	GC
SNCAIP	2.93709e-57	1.7784	0.433	0.048	8.02266e-53	GC
PPM1H	4.39496e-55	1.77146	0.562	0.343	1.20048e-50	GC
COL6A3	1.49786e-56	1.76856	0.639	0.179	4.09142e-52	GC
FBN1	2.29942e-75	1.75739	0.615	0.318	6.28085e-71	GC
PLA2G5	1.05529e-53	1.75005	0.505	0.181	2.88253e-49	GC
TSHZ3	1.47114e-58	1.74475	0.5	0.08	4.01842e-54	GC
DIRC3	3.48492e-34	1.73663	0.341	0.224	9.51905e-30	GC
MEG8	1.76992e-45	1.72553	0.423	0.099	4.83453e-41	GC
CFH	1.02036e-45	1.72012	0.615	0.38	2.78711e-41	GC
RASGRF2	5.27039e-61	1.71632	0.476	0.107	1.43961e-56	GC
ID2	4.65743e-29	1.70375	0.293	0.091	1.27218e-24	GC
NFIB	1.12832e-54	1.69677	0.635	0.378	3.082e-50	GC
PCDH11X	1.62152e-35	1.68631	0.284	0.062	4.42919e-31	GC
CLSTN2	5.20516e-35	1.67826	0.663	0.552	1.42179e-30	GC
PLCXD3	5.71127e-33	1.67745	0.538	0.289	1.56003e-28	GC
CMYA5	1.49998e-53	1.65277	0.543	0.202	4.0972e-49	GC
NFIA	4.23757e-49	1.65213	0.639	0.378	1.15749e-44	GC
IMMP2L	1.92855e-71	1.64517	0.918	0.819	5.26783e-67	GC
PDE10A	3.95844e-36	1.6301	0.356	0.109	1.08125e-31	GC
TOX	1.32337e-46	1.62473	0.346	0.03	3.61479e-42	GC
LARGE1	2.63697e-58	1.6168	0.615	0.412	7.20288e-54	GC
PITPNC1	3.79727e-44	1.61303	0.534	0.311	1.03722e-39	GC
RORA	1.96239e-84	1.61132	0.865	0.776	5.36026e-80	GC
PLCG2	9.52811e-40	1.60271	0.683	0.453	2.6026e-35	GC
GULP1	6.16089e-55	1.59467	0.567	0.221	1.68285e-50	GC
PTPN13	2.4489e-60	1.58391	0.692	0.391	6.68916e-56	GC
RYR2	2.6835e-30	1.58139	0.37	0.159	7.32998e-26	GC
EBF1	4.17838e-20	1.57643	0.279	0.119	1.14132e-15	GC
C1orf21	4.46304e-48	1.5659	0.582	0.306	1.21908e-43	GC
KCNMA1	1.54848e-26	1.56503	0.332	0.143	4.22966e-22	GC
MAST4	2.64717e-60	1.56495	0.697	0.508	7.23074e-56	GC
SFMBT2	1.1447e-47	1.53418	0.668	0.365	3.12675e-43	GC
GBE1	1.65334e-31	1.51968	0.567	0.562	4.51611e-27	GC
ABI3BP	1.13502e-42	1.50473	0.38	0.086	3.1003e-38	GC
NR3C2	6.50075e-43	1.50329	0.62	0.333	1.77568e-38	GC
ARHGAP10	8.03145e-56	1.50229	0.798	0.527	2.19379e-51	GC
MBNL1	1.32922e-65	1.49981	0.716	0.653	3.63078e-61	GC
WT1	1.91594e-37	1.48692	0.409	0.093	5.23339e-33	GC
BNIP3L	1.64244e-38	1.48568	0.712	0.611	4.48632e-34	GC
C7	2.74855e-28	1.48332	0.481	0.292	7.50768e-24	GC
MAPK10	4.07868e-45	1.46403	0.495	0.309	1.11409e-40	GC
PLA2R1	3.60038e-58	1.45568	0.505	0.161	9.83445e-54	GC
FOXO3	1.19443e-51	1.45437	0.697	0.484	3.26258e-47	GC
MCC	9.65126e-66	1.45053	0.865	0.811	2.63624e-61	GC
CCND3	2.15359e-42	1.45035	0.505	0.213	5.88253e-38	GC
PDGFD	6.36139e-42	1.44363	0.538	0.444	1.73761e-37	GC
TCF4	3.36474e-48	1.44074	0.788	0.575	9.19079e-44	GC
BCL6	1.75582e-44	1.43146	0.466	0.181	4.79603e-40	GC
ALPK1	1.30355e-48	1.41991	0.476	0.287	3.56064e-44	GC
DMD	6.92592e-31	1.41916	0.611	0.495	1.89182e-26	GC
DCN	2.11919e-47	1.41821	0.707	0.488	5.78858e-43	GC
IGFBP5	3.83468e-40	1.41242	0.519	0.388	1.04744e-35	GC
RNF217	4.42195e-49	1.40872	0.683	0.381	1.20786e-44	GC
DOCK4	5.39358e-39	1.4015	0.582	0.345	1.47326e-34	GC
CCSER1	3.13032e-34	1.3968	0.389	0.274	8.55046e-30	GC
PRRX1	3.71502e-38	1.37275	0.317	0.038	1.01476e-33	GC
MTUS1	7.64221e-47	1.3707	0.567	0.204	2.08747e-42	GC
CACNA2D3	8.3883e-29	1.3555	0.341	0.13	2.29126e-24	GC
MITF	5.31407e-38	1.35459	0.5	0.315	1.45154e-33	GC
AKT3	2.71255e-56	1.35407	0.894	0.774	7.40934e-52	GC
TNS1	1.24365e-49	1.34166	0.567	0.243	3.39704e-45	GC
EHBP1	3.47989e-61	1.34076	0.793	0.644	9.50533e-57	GC
PRELID2	4.62959e-35	1.33404	0.548	0.491	1.26457e-30	GC
ZNF331	1.81936e-32	1.334	0.322	0.149	4.96959e-28	GC
SYTL4	3.62779e-48	1.33394	0.697	0.419	9.90932e-44	GC
NR2F1-AS1	5.78001e-37	1.33194	0.462	0.192	1.57881e-32	GC
PHF21A	3.44681e-43	1.32393	0.817	0.755	9.41495e-39	GC
ZHX2	1.82111e-45	1.32117	0.635	0.339	4.97436e-41	GC
CDH11	4.91468e-42	1.31914	0.707	0.585	1.34245e-37	GC
ANTXR2	5.38221e-47	1.30328	0.659	0.437	1.47015e-42	GC
TCF7L2	6.02748e-36	1.30204	0.736	0.579	1.64641e-31	GC
FKBP5	3.16092e-42	1.29938	0.764	0.645	8.63405e-38	GC
FBXO32	3.48843e-16	1.29696	0.519	0.321	9.52863e-12	GC
LXN	2.69035e-30	1.29588	0.337	0.112	7.3487e-26	GC
ARHGAP6	1.32496e-28	1.29492	0.625	0.441	3.61914e-24	GC
PLCL2	6.72435e-36	1.29395	0.514	0.242	1.83676e-31	GC
DENND4A	3.13774e-58	1.29343	0.75	0.614	8.57075e-54	GC
KCNT2	1.40202e-47	1.2844	0.731	0.643	3.82961e-43	GC
SNED1	4.47974e-32	1.28286	0.486	0.234	1.22364e-27	GC
CALD1	1.11296e-57	1.28226	0.841	0.731	3.04005e-53	GC
NDRG1	3.61795e-25	1.27392	0.601	0.376	9.88243e-21	GC
CDON	1.04267e-36	1.27336	0.409	0.102	2.84804e-32	GC
TSPAN5	1.02712e-40	1.26725	0.668	0.555	2.80559e-36	GC
SPATA6	1.1441e-48	1.25808	0.534	0.271	3.12511e-44	GC
MSC-AS1	8.94096e-35	1.24826	0.264	0.031	2.44222e-30	GC
ROBO1	2.64093e-35	1.24448	0.495	0.503	7.21369e-31	GC
ROR1	6.07773e-32	1.24339	0.471	0.367	1.66013e-27	GC
STAG1	1.2091e-56	1.23968	0.894	0.743	3.30266e-52	GC
KALRN	4.79075e-30	1.23541	0.337	0.233	1.30859e-25	GC
FMNL2	2.55897e-39	1.23448	0.764	0.7	6.98983e-35	GC
NR2F2	1.45322e-36	1.23036	0.524	0.257	3.96948e-32	GC
AC016831.7	6.78005e-54	1.2271	0.947	0.884	1.85197e-49	GC
RNF24	1.70815e-31	1.22696	0.385	0.347	4.66581e-27	GC
LINC00894	1.83758e-37	1.21616	0.49	0.311	5.01935e-33	GC
NFIX	2.50952e-41	1.20577	0.457	0.113	6.85475e-37	GC
HAND2-AS1	9.67208e-38	1.20393	0.312	0.07	2.64193e-33	GC
FAM189A2	2.33435e-41	1.20054	0.361	0.043	6.37629e-37	GC
NAALADL2	1.7772e-33	1.19811	0.562	0.488	4.85442e-29	GC
PRKAG2	3.29216e-34	1.19381	0.404	0.151	8.99252e-30	GC
SORBS1	5.23899e-11	1.19258	0.356	0.233	1.43103e-06	GC
NHS	1.84788e-28	1.19211	0.409	0.294	5.04748e-24	GC
SH3BP5	3.20881e-33	1.19208	0.418	0.283	8.76486e-29	GC
OSMR-AS1	2.04775e-34	1.18153	0.452	0.23	5.59342e-30	GC
EPB41L3	1.55979e-40	1.17516	0.303	0.026	4.26057e-36	GC
STK3	1.64957e-46	1.16472	0.75	0.671	4.50579e-42	GC
CHST15	1.77355e-35	1.16253	0.394	0.07	4.84444e-31	GC
PCSK5	7.13827e-24	1.15647	0.668	0.434	1.94982e-19	GC
MBP	1.09527e-31	1.15529	0.341	0.07	2.99172e-27	GC
BOC	3.47127e-23	1.15288	0.312	0.122	9.48178e-19	GC
VLDLR-AS1	3.9861e-29	1.15208	0.399	0.21	1.0888e-24	GC
ANKRD12	1.02067e-39	1.15163	0.774	0.649	2.78796e-35	GC
ZNF704	2.71413e-32	1.15087	0.606	0.44	7.41365e-28	GC
HIVEP2	3.30641e-33	1.15007	0.63	0.447	9.03146e-29	GC
BCL2	6.62395e-25	1.14992	0.668	0.515	1.80933e-20	GC
BACH2	4.98111e-27	1.14385	0.49	0.317	1.36059e-22	GC
MID1	4.40949e-16	1.14177	0.303	0.204	1.20445e-11	GC
GRB10	2.12532e-33	1.13889	0.365	0.072	5.80531e-29	GC
MYO1E	2.24122e-20	1.1363	0.389	0.26	6.12189e-16	GC
GNG4	3.91165e-26	1.13542	0.303	0.065	1.06847e-21	GC
SVIL	1.27971e-44	1.13492	0.841	0.731	3.49552e-40	GC
PARD3	9.79004e-51	1.13175	0.923	0.899	2.67415e-46	GC
ZFPM2	1.54179e-36	1.13032	0.889	0.809	4.2114e-32	GC
PLXNA4	6.3141e-20	1.13032	0.279	0.153	1.7247e-15	GC
ERC2	1.02039e-24	1.13011	0.346	0.179	2.78719e-20	GC
ZFP36L1	3.9651e-30	1.13007	0.572	0.352	1.08307e-25	GC
ARHGAP44	2.12825e-30	1.12897	0.365	0.146	5.81332e-26	GC
IGFBP3	1.06681e-27	1.1256	0.274	0.044	2.91399e-23	GC
AC026316.5	1.80586e-18	1.11814	0.351	0.215	4.93272e-14	GC
MYCBP2	1.189e-42	1.11742	0.721	0.583	3.24774e-38	GC
STAT5B	7.58316e-40	1.11729	0.611	0.425	2.07134e-35	GC
GALNT15	9.55515e-23	1.1133	0.279	0.133	2.60999e-18	GC
UTRN	7.20304e-45	1.11189	0.779	0.657	1.96751e-40	GC
SERPING1	2.25583e-38	1.10822	0.433	0.116	6.16181e-34	GC
CARMN	5.42559e-34	1.10716	0.375	0.069	1.482e-29	GC
AL139383.1	6.15149e-29	1.10248	0.356	0.199	1.68028e-24	GC
CBLB	2.14182e-28	1.10235	0.788	0.707	5.85037e-24	GC
TFRC	6.89078e-18	1.1016	0.361	0.276	1.88222e-13	GC
FAM160A1	1.47549e-21	1.10054	0.322	0.126	4.0303e-17	GC
CHST11	5.22564e-23	1.09997	0.476	0.429	1.42738e-18	GC
ACSS3	4.68244e-39	1.09929	0.524	0.362	1.27901e-34	GC
EVA1C	2.94959e-27	1.09824	0.418	0.157	8.0568e-23	GC
CPQ	5.97684e-39	1.09696	0.639	0.523	1.63257e-34	GC
VPS13B	6.42383e-52	1.08775	0.822	0.731	1.75467e-47	GC
ADAMTS1	5.62068e-21	1.08677	0.346	0.145	1.53529e-16	GC
FUT8	2.39925e-24	1.0796	0.312	0.272	6.55356e-20	GC
RBMS3	7.11721e-25	1.07935	0.514	0.399	1.94407e-20	GC
RBFOX2	7.11868e-49	1.07783	0.745	0.655	1.94447e-44	GC
C3	2.62208e-20	1.07638	0.279	0.082	7.16222e-16	GC
ENOX1	6.53581e-20	1.074	0.438	0.319	1.78526e-15	GC
NRK	7.73618e-27	1.06954	0.269	0.116	2.11314e-22	GC
FAM214A	7.97557e-33	1.06575	0.543	0.393	2.17853e-28	GC
STAT3	1.88963e-30	1.06336	0.644	0.662	5.16152e-26	GC
TMTC2	1.33615e-17	1.06191	0.274	0.145	3.6497e-13	GC
BICC1	1.04739e-21	1.06183	0.582	0.405	2.86094e-17	GC
TCAF2	5.33492e-31	1.0579	0.269	0.143	1.45723e-26	GC
SMG6	1.13919e-37	1.05756	0.644	0.491	3.11171e-33	GC
LDB2	2.03433e-17	1.05579	0.312	0.131	5.55677e-13	GC
DDR2	4.38741e-31	1.05275	0.51	0.35	1.19842e-26	GC
ANKS1B	7.84831e-24	1.05168	0.269	0.089	2.14377e-19	GC
CRADD	5.70504e-35	1.04282	0.452	0.421	1.55833e-30	GC
BNIP3	1.24049e-14	1.03325	0.481	0.331	3.3884e-10	GC
PDK1	1.61078e-14	1.03322	0.351	0.246	4.39984e-10	GC
RUNX1T1	1.40139e-18	1.03286	0.312	0.122	3.8279e-14	GC
TWIST2	1.25946e-27	1.03264	0.322	0.073	3.44023e-23	GC
ZNF521	8.4925e-28	1.02745	0.466	0.351	2.31973e-23	GC
FBXO21	6.3548e-42	1.02672	0.495	0.315	1.73581e-37	GC
LPAR1	7.09486e-31	1.02169	0.274	0.031	1.93796e-26	GC
IGFBP4	2.78543e-27	1.02148	0.49	0.291	7.6084e-23	GC
HERPUD1	4.10625e-29	1.02078	0.399	0.206	1.12162e-24	GC
COL18A1	6.49043e-36	1.01311	0.423	0.094	1.77286e-31	GC
PROS1	8.36045e-21	1.01003	0.269	0.138	2.28366e-16	GC
CCNY	4.25545e-37	1.0096	0.702	0.638	1.16238e-32	GC
ASXL3	2.53742e-34	1.00667	0.288	0.031	6.93097e-30	GC
DPY19L2	4.11096e-27	0.999116	0.399	0.161	1.12291e-22	GC
COL5A1	6.14584e-28	0.997376	0.327	0.107	1.67874e-23	GC
ASPH	1.46442e-24	0.996445	0.49	0.284	4.00006e-20	GC
MIR29B2CHG	8.14022e-36	0.993837	0.447	0.147	2.2235e-31	GC
ZNF516	2.20287e-22	0.993218	0.649	0.447	6.01713e-18	GC
PLXNA2	1.82281e-17	0.992327	0.308	0.114	4.97901e-13	GC
LRP1	3.17506e-31	0.990178	0.534	0.222	8.67268e-27	GC
NPEPPS	2.26769e-36	0.98858	0.788	0.658	6.19419e-32	GC
FBLN1	1.28787e-16	0.984656	0.255	0.118	3.5178e-12	GC
STT3B	3.30997e-34	0.981813	0.572	0.521	9.04118e-30	GC
TRPM3	4.02394e-31	0.97851	0.293	0.085	1.09914e-26	GC
C1S	4.4302e-22	0.975725	0.538	0.356	1.21011e-17	GC
EFEMP1	5.01085e-19	0.975705	0.447	0.207	1.36871e-14	GC
HLF	5.40749e-36	0.974654	0.303	0.04	1.47706e-31	GC
MICAL3	1.1086e-30	0.970905	0.447	0.253	3.02814e-26	GC
FAM13A	3.01203e-30	0.969029	0.716	0.684	8.22737e-26	GC
MXI1	1.20354e-19	0.963842	0.534	0.322	3.28747e-15	GC
PPP6R3	5.79131e-43	0.963719	0.865	0.796	1.5819e-38	GC
SLC2A13	1.698e-16	0.962742	0.288	0.254	4.63808e-12	GC
CUX1	3.17367e-25	0.959986	0.861	0.834	8.66889e-21	GC
USP37	4.01309e-20	0.959182	0.452	0.306	1.09618e-15	GC
MAMDC2	4.21652e-23	0.957566	0.486	0.461	1.15174e-18	GC
TGFBR3	6.22643e-22	0.95091	0.75	0.686	1.70075e-17	GC
LINC01197	5.19363e-17	0.947549	0.351	0.216	1.41864e-12	GC
ENPP1	5.3589e-23	0.946949	0.279	0.088	1.46378e-18	GC
AASS	1.35235e-25	0.945968	0.495	0.315	3.69393e-21	GC
VGLL4	2.81495e-35	0.943757	0.639	0.568	7.68902e-31	GC
LPIN1	9.12342e-25	0.942974	0.361	0.196	2.49206e-20	GC
TBC1D2B	4.57545e-28	0.940065	0.462	0.287	1.24978e-23	GC
CASK	7.41179e-27	0.938669	0.625	0.588	2.02453e-22	GC
C9orf72	4.30024e-23	0.938583	0.399	0.202	1.17461e-18	GC
NDUFAF2	2.00526e-24	0.9355	0.442	0.283	5.47736e-20	GC
DEPTOR	2.55791e-15	0.935328	0.394	0.25	6.98693e-11	GC
ANKRD44	7.16333e-20	0.935103	0.356	0.186	1.95666e-15	GC
ACADL	1.35291e-44	0.932452	0.337	0.026	3.69547e-40	GC
SDC2	5.90203e-18	0.932176	0.428	0.302	1.61214e-13	GC
AC090825.1	7.77208e-31	0.930576	0.327	0.171	2.12294e-26	GC
MAP3K5	7.77401e-24	0.92921	0.885	0.888	2.12347e-19	GC
MAGI2	2.20263e-25	0.929132	0.712	0.765	6.01647e-21	GC
AC010737.1	2.56619e-22	0.926569	0.298	0.081	7.00954e-18	GC
NCALD	9.69282e-20	0.924555	0.409	0.381	2.6476e-15	GC
COL4A5	7.746e-28	0.924446	0.423	0.248	2.11582e-23	GC
ZBTB20	8.25935e-43	0.924267	0.966	0.95	2.25604e-38	GC
MTCP1	3.92482e-22	0.923132	0.279	0.255	1.07206e-17	GC
MAP3K20	4.39383e-23	0.922013	0.736	0.564	1.20018e-18	GC
FCHO2	1.62909e-21	0.918762	0.582	0.363	4.44987e-17	GC
MIPOL1	5.08192e-31	0.918044	0.438	0.38	1.38813e-26	GC
DGKH	4.71824e-19	0.917989	0.346	0.214	1.28879e-14	GC
CCNH	1.44589e-34	0.91752	0.572	0.538	3.94945e-30	GC
TPM1	6.75757e-23	0.916788	0.486	0.354	1.84583e-18	GC
NIN	9.50175e-28	0.916248	0.308	0.143	2.5954e-23	GC
TTN-AS1	2.05651e-34	0.913714	0.452	0.434	5.61737e-30	GC
DYNC2H1	1.11018e-29	0.91369	0.534	0.453	3.03245e-25	GC
DYM	6.87479e-30	0.912288	0.745	0.625	1.87785e-25	GC
SMC5	1.43928e-31	0.911521	0.779	0.618	3.9314e-27	GC
CLIP4	3.36998e-23	0.911434	0.524	0.293	9.20511e-19	GC
DIAPH2	6.79627e-28	0.910545	0.75	0.696	1.8564e-23	GC
KIAA1328	5.80988e-23	0.908908	0.562	0.473	1.58697e-18	GC
IRS2	5.72449e-20	0.901148	0.409	0.21	1.56364e-15	GC
MYO1D	5.59278e-23	0.900824	0.543	0.441	1.52767e-18	GC
SLC9A9	9.24067e-25	0.900145	0.37	0.278	2.52409e-20	GC
SKAP2	1.86669e-22	0.898304	0.351	0.241	5.09886e-18	GC
PKD2	2.61344e-31	0.897803	0.587	0.513	7.13862e-27	GC
COL14A1	1.23174e-20	0.897413	0.284	0.123	3.3645e-16	GC
PDZRN3	6.10305e-19	0.89699	0.755	0.765	1.66705e-14	GC
PCGF5	1.97123e-32	0.895262	0.514	0.389	5.38442e-28	GC
FAM20A	6.08327e-27	0.894297	0.341	0.106	1.66164e-22	GC
FYN	9.8667e-23	0.891073	0.562	0.447	2.69509e-18	GC
ANAPC16	4.9283e-31	0.889429	0.712	0.557	1.34617e-26	GC
CTTNBP2	5.79339e-31	0.889051	0.264	0.028	1.58247e-26	GC
TMTC1	4.60299e-13	0.889049	0.38	0.265	1.25731e-08	GC
ARHGAP29	1.09961e-23	0.888929	0.288	0.052	3.00358e-19	GC
SH3RF1	3.97382e-22	0.888386	0.462	0.367	1.08545e-17	GC
TRAF3IP2-AS1	1.23719e-23	0.887585	0.394	0.404	3.37939e-19	GC
MEF2C-AS1	1.27024e-19	0.886707	0.514	0.47	3.46967e-15	GC
ITGB8	1.25653e-19	0.885806	0.269	0.067	3.43221e-15	GC
COL5A2	1.40566e-18	0.884351	0.346	0.198	3.83957e-14	GC
JAK1	1.55404e-26	0.883517	0.567	0.409	4.24487e-22	GC
PLOD2	6.67846e-09	0.88177	0.5	0.42	0.000182422	GC
TNRC6B	1.25386e-33	0.881147	0.827	0.765	3.42491e-29	GC
RNF149	5.20316e-31	0.879564	0.505	0.35	1.42124e-26	GC
CDC42BPA	2.76199e-25	0.878177	0.683	0.6	7.54438e-21	GC
ZCCHC7	1.24906e-27	0.877789	0.707	0.707	3.41181e-23	GC
FNBP1	2.6891e-24	0.877221	0.529	0.376	7.34529e-20	GC
ATL2	1.86121e-30	0.876804	0.611	0.426	5.0839e-26	GC
SOS1	1.04611e-26	0.873794	0.764	0.684	2.85744e-22	GC
COL12A1	7.11746e-14	0.872364	0.288	0.112	1.94413e-09	GC
TRIM2	9.28443e-26	0.871942	0.365	0.257	2.53604e-21	GC
C1R	7.67146e-21	0.871057	0.447	0.264	2.09546e-16	GC
ABCA6	5.45127e-20	0.868889	0.51	0.359	1.48901e-15	GC
PCM1	2.87353e-32	0.864318	0.769	0.676	7.84906e-28	GC
BTAF1	8.18317e-22	0.864054	0.505	0.462	2.23523e-17	GC
UGP2	1.56122e-25	0.863575	0.38	0.303	4.26446e-21	GC
STIM1	3.86925e-21	0.863476	0.394	0.272	1.05689e-16	GC
FAF1	1.3226e-30	0.863062	0.745	0.683	3.61268e-26	GC
AGAP1	5.379e-23	0.862354	0.75	0.736	1.46927e-18	GC
UACA	1.58283e-23	0.861915	0.529	0.397	4.3235e-19	GC
KIZ	5.90115e-21	0.859573	0.466	0.289	1.6119e-16	GC
ZNF407	2.5332e-28	0.856	0.529	0.53	6.91944e-24	GC
PLIN5	1.42934e-31	0.855831	0.274	0.04	3.90424e-27	GC
PIAS1	1.7739e-35	0.854191	0.688	0.654	4.8454e-31	GC
FGFR1	6.22392e-18	0.853905	0.524	0.246	1.70006e-13	GC
ECHDC2	7.62052e-31	0.853691	0.697	0.531	2.08154e-26	GC
PRELP	8.03973e-26	0.851253	0.341	0.075	2.19605e-21	GC
SH3PXD2A	1.88274e-19	0.849381	0.5	0.267	5.1427e-15	GC
CYBRD1	3.23442e-25	0.847162	0.418	0.143	8.83481e-21	GC
TRIO	3.56986e-28	0.845355	0.841	0.766	9.75108e-24	GC
RNF150	1.15547e-12	0.845054	0.418	0.325	3.15617e-08	GC
RALGAPA1	5.15584e-31	0.842666	0.769	0.686	1.40832e-26	GC
WWTR1	1.49617e-21	0.842455	0.625	0.485	4.08678e-17	GC
BBS9	2.09134e-30	0.842224	0.543	0.507	5.71249e-26	GC
NEDD4L	1.80244e-14	0.841526	0.394	0.389	4.92337e-10	GC
ACTN1	2.27291e-17	0.84095	0.327	0.166	6.20846e-13	GC
PDGFRA	1.90251e-28	0.840687	0.375	0.08	5.1967e-24	GC
ABCA8	8.20373e-21	0.840561	0.505	0.436	2.24085e-16	GC
MAN1C1	2.06369e-24	0.838957	0.26	0.059	5.63697e-20	GC
B4GALT1	6.28124e-18	0.837266	0.438	0.382	1.71572e-13	GC
SLC40A1	8.81029e-17	0.83648	0.558	0.388	2.40653e-12	GC
PTPRM	1.08692e-26	0.834767	0.688	0.705	2.96892e-22	GC
NIPBL	3.22104e-34	0.834755	0.846	0.778	8.79827e-30	GC
IFI16	1.41761e-23	0.833844	0.438	0.304	3.87221e-19	GC
STARD9	5.91521e-22	0.833107	0.385	0.15	1.61574e-17	GC
AC104123.1	7.71473e-21	0.831397	0.274	0.209	2.10728e-16	GC
AUH	1.64729e-24	0.83114	0.644	0.54	4.49958e-20	GC
UMAD1	1.60344e-32	0.830652	0.462	0.46	4.3798e-28	GC
FPGS	1.6594e-27	0.830208	0.312	0.116	4.53265e-23	GC
SH3PXD2B	3.75637e-25	0.830014	0.423	0.252	1.02605e-20	GC
CAST	1.95363e-26	0.829742	0.481	0.408	5.33634e-22	GC
FBXO42	1.31464e-23	0.829213	0.572	0.562	3.59094e-19	GC
RASSF3	2.09866e-21	0.828125	0.293	0.157	5.7325e-17	GC
ETS2	2.5764e-24	0.826836	0.269	0.07	7.03743e-20	GC
RBMS1	4.66391e-27	0.826243	0.779	0.748	1.27395e-22	GC
KANK2	2.97383e-27	0.824606	0.351	0.084	8.12302e-23	GC
LRMDA	1.634e-19	0.82126	0.75	0.77	4.46328e-15	GC
STAG2	5.17972e-26	0.821024	0.591	0.467	1.41484e-21	GC
IFT172	3.24046e-23	0.818712	0.385	0.187	8.85131e-19	GC
ANKS1A	6.27813e-27	0.811782	0.567	0.542	1.71487e-22	GC
TULP3	1.28165e-17	0.811729	0.428	0.235	3.50083e-13	GC
ZEB1	3.07832e-19	0.811301	0.514	0.456	8.40843e-15	GC
SMARCA2	1.48316e-26	0.804562	0.606	0.582	4.05124e-22	GC
CAMK2D	5.53968e-19	0.804556	0.635	0.544	1.51316e-14	GC
CLCN5	1.49049e-20	0.804181	0.284	0.135	4.07127e-16	GC
GALK2	1.12801e-22	0.802752	0.442	0.295	3.08115e-18	GC
MLXIP	1.30038e-23	0.802672	0.428	0.221	3.55198e-19	GC
MAPRE2	1.09265e-17	0.801577	0.293	0.201	2.98458e-13	GC
RGS22	8.68455e-17	0.801486	0.274	0.101	2.37218e-12	GC
SGK1	3.41206e-19	0.80093	0.49	0.438	9.32005e-15	GC
NCKAP1	4.56229e-26	0.798565	0.639	0.534	1.24619e-21	GC
RPS27	1.16764e-20	0.797677	0.538	0.443	3.1894e-16	GC
RAP1A	1.65542e-20	0.797285	0.466	0.424	4.52178e-16	GC
GPATCH8	2.27445e-31	0.795385	0.716	0.675	6.21267e-27	GC
CNTLN	1.13577e-23	0.795147	0.548	0.456	3.10236e-19	GC
CDC73	3.16474e-25	0.795	0.591	0.51	8.6445e-21	GC
CAMKMT	2.99649e-27	0.794229	0.356	0.414	8.18492e-23	GC
IFT88	2.26805e-16	0.793981	0.365	0.282	6.19518e-12	GC
TBC1D15	7.60147e-23	0.792826	0.572	0.399	2.07634e-18	GC
DENND5B	8.80426e-23	0.792515	0.712	0.714	2.40488e-18	GC
CEBPD	6.77647e-20	0.790186	0.514	0.482	1.85099e-15	GC
MLLT3	4.04835e-16	0.789235	0.514	0.467	1.10581e-11	GC
DSCAML1	1.84184e-15	0.788884	0.312	0.185	5.03099e-11	GC
STXBP1	6.38849e-21	0.788498	0.38	0.211	1.74502e-16	GC
FTO	3.4813e-32	0.787307	0.721	0.728	9.50918e-28	GC
HERC3	2.55342e-21	0.785634	0.274	0.102	6.97468e-17	GC
ARHGEF3	2.17773e-15	0.785065	0.462	0.456	5.94846e-11	GC
EBF4	1.31868e-17	0.784298	0.26	0.066	3.60199e-13	GC
TPCN1	3.83231e-24	0.784104	0.327	0.17	1.04679e-19	GC
DZIP1	7.44186e-25	0.784076	0.346	0.092	2.03274e-20	GC
COL6A2	7.73208e-19	0.782523	0.462	0.218	2.11202e-14	GC
ADD3	2.40575e-26	0.780866	0.385	0.313	6.57132e-22	GC
COG5	6.02273e-32	0.77992	0.611	0.616	1.64511e-27	GC
PRKRIP1	1.2825e-20	0.777889	0.452	0.423	3.50316e-16	GC
ESYT2	6.90262e-22	0.776739	0.688	0.677	1.88545e-17	GC
[truncated: 4,959 more rows]

## Sheet: ST5
Supplementary Table 5. HIF-1 pathway-related DEGs that were up-regulated in CDKN1A+ cells
Genes
AKT2
ARNT
BCL2
CAMK2D
ENO1
HIF1A
HK2
INSR
PDK1
PFKFB3
PGK1
PLCG2
MAP2K1
STAT3
AKT3
EGLN1
ATP2B4
NNMT
PDK3
PSEN1
RORA
SLC25A12
IRS2
MBTPS1
KAT2B
H6PD
INSIG2
PRKAG2
PID1
PPP4R3B
LONP2
TTC39B
PLIN5
BNIP3
SLC39A14
CASK
RPS9
NDUFS2
SLC2A3
LPIN1
GAPDH
PLSCR1
CHST11
SLC2A13
SDHA
PTGIS
GBE1
RPS14
ACO1
NAMPT
CHSY1
AKAP12
CBLB
BANP
COL18A1
NCOA7
EEF2
ID2
ND2
AHCYL1
TFRC
HBB
SND1
NR4A3
CDKN1A
SH3BP5
HSPA1B
C3
DDIT4

## Sheet: ST6
Supplementary Table 6. Differentially activated chromVAR motifs in each cell type
avg_log2FC: the Log2 fold change of chromVAR motif score in the current cluster against the rest of clusters. pct.1: the percentage of cells in the current cluster which have binding activity of the current motif. pct.2: the percentage of cells in the rest of cluster which have binding activity of the current motif. cluster: cluster ID. p_val: P value; p_val_adj: Bonferroni-adjusted p-value. TF: …
motif_ID	p_val	avg_diff	pct.1	pct.2	p_val_adj	cluster	TF
MA0698.1	0	0.963802	0.543	0.234	0	SC	ZBTB18
MA0091.1	0	0.954528	0.545	0.236	0	SC	TAL1::TCF3
MA1472.1	0	0.856532	0.54	0.254	0	SC	BHLHA15(var.2)
MA1641.1	0	0.82202	0.537	0.261	0	SC	MYF5
MA1123.2	0	0.821687	0.534	0.263	0	SC	TWIST1
MA1467.1	0	0.669099	0.53	0.293	0	SC	ATOH1(var.2)
MA0500.2	0	0.588763	0.528	0.326	0	SC	MYOG
MA1638.1	0	0.565448	0.53	0.323	0	SC	HAND2
MA1109.1	0	0.559002	0.527	0.32	0	SC	NEUROD1
MA1642.1	0	0.554061	0.528	0.323	0	SC	NEUROG2(var.2)
MA0761.2	0	4.77299	0.995	0.385	0	EC	ETV1
MA0062.3	0	4.52843	0.994	0.39	0	EC	GABPA
MA0598.3	0	4.35247	0.989	0.381	0	EC	EHF
MA1508.1	0	4.26121	0.99	0.404	0	EC	IKZF1
MA0473.3	0	3.95437	0.988	0.393	0	EC	ELF1
MA0640.2	0	3.86623	0.985	0.395	0	EC	ELF3
MA0764.2	0	3.67232	0.989	0.413	0	EC	ETV4
MA0762.1	0	3.61382	0.974	0.417	0	EC	ETV2
MA0081.2	0	2.68428	0.974	0.423	0	EC	SPIB
MA0136.2	0	2.65846	0.956	0.412	0	EC	ELF5
MA0868.2	0	2.61507	0.942	0.437	0	EC	SOX8
MA0760.1	0	2.55406	0.932	0.427	0	EC	ERF
MA0474.2	0	2.49531	0.922	0.428	0	EC	ERG
MA0098.3	0	2.39647	0.909	0.433	0	EC	ETS1
MA0080.5	0	2.35092	0.962	0.437	0	EC	SPI1
MA0645.1	0	2.34138	0.936	0.423	0	EC	ETV6
MA0077.1	0	2.21825	0.921	0.444	0	EC	SOX9
MA0475.2	0	2.17626	0.897	0.434	0	EC	FLI1
MA1484.1	0	2.1241	0.895	0.433	0	EC	ETS2
MA0076.2	0	2.0979	0.906	0.432	0	EC	ELK4
MA0143.4	0	2.0819	0.914	0.453	0	EC	SOX2
MA0765.2	0	2.05294	0.897	0.431	0	EC	ETV5
MA1120.1	0	2.05104	0.911	0.45	0	EC	SOX13
MA0750.2	0	1.87275	0.915	0.442	0	EC	ZBTB7A
MA1152.1	0	1.80144	0.902	0.446	0	EC	SOX15
MA1562.1	0	1.78637	0.897	0.454	0	EC	SOX14
MA0641.1	0	1.75693	0.89	0.436	0	EC	ELF4
MA0687.1	0	1.69894	0.902	0.437	0	EC	SPIC
MA0156.2	0	1.59669	0.836	0.442	0	EC	FEV
MA0759.1	0	1.55434	0.825	0.441	0	EC	ELK3
MA1483.1	0	1.5301	0.862	0.445	0	EC	ELF2
MA0489.1	1.48191e-239	1.49087	0.764	0.417	9.38047e-237	EC	JUN(var.2)
MA0478.1	6.56682e-214	1.39608	0.759	0.414	4.1568e-211	EC	FOSL2
MA0867.2	0	1.38998	0.852	0.457	0	EC	SOX4
MA1128.1	5.37848e-211	1.38475	0.746	0.416	3.40458e-208	EC	FOSL1::JUN
MA1130.1	2.96014e-206	1.37134	0.75	0.418	1.87377e-203	EC	FOSL2::JUN
MA1141.1	3.48745e-203	1.36876	0.734	0.416	2.20756e-200	EC	FOS::JUND
MA1137.1	3.32676e-210	1.36055	0.741	0.415	2.10584e-207	EC	FOSL1::JUNB
MA0099.3	2.33038e-204	1.35624	0.741	0.416	1.47513e-201	EC	FOS::JUN
MA0476.1	1.81911e-210	1.35433	0.748	0.415	1.1515e-207	EC	FOS
MA0763.1	1.42129e-300	1.35104	0.805	0.445	8.99677e-298	EC	ETV3
MA0686.1	0	1.31031	0.846	0.462	0	EC	SPDEF
MA0477.2	2.97468e-191	1.29731	0.731	0.416	1.88297e-188	EC	FOSL1
MA0462.2	2.94179e-200	1.29456	0.741	0.415	1.86215e-197	EC	BATF::JUN
MA1634.1	1.54484e-195	1.2787	0.735	0.415	9.77881e-193	EC	BATF
MA1138.1	6.97254e-188	1.26713	0.728	0.417	4.41362e-185	EC	FOSL2::JUNB
MA0101.1	0	1.26693	0.837	0.47	0	EC	REL
MA0835.2	6.70041e-197	1.25977	0.735	0.416	4.24136e-194	EC	BATF3
MA1142.1	4.98737e-189	1.25837	0.724	0.417	3.15701e-186	EC	FOSL1::JUND
MA1134.1	9.71809e-181	1.2464	0.722	0.419	6.15155e-178	EC	FOS::JUNB
MA1144.1	9.72767e-182	1.2437	0.725	0.417	6.15761e-179	EC	FOSL2::JUND
MA1135.1	4.50706e-179	1.22861	0.718	0.417	2.85297e-176	EC	FOSB::JUNB
MA0491.2	1.81963e-177	1.20944	0.718	0.419	1.15182e-174	EC	JUND
MA0490.2	2.42015e-183	1.20377	0.727	0.42	1.53195e-180	EC	JUNB
MA0028.2	4.72415e-240	1.17634	0.773	0.451	2.99039e-237	EC	ELK1
MA0107.1	0	1.1538	0.833	0.468	0	EC	RELA
MA0655.1	2.75543e-176	1.13615	0.727	0.418	1.74418e-173	EC	JDP2
MA1563.1	2.84193e-292	1.13222	0.815	0.468	1.79894e-289	EC	SOX18
MA1132.1	1.54291e-170	1.11617	0.72	0.425	9.7666e-168	EC	JUN::JUNB
MA0841.1	3.20829e-171	1.10532	0.71	0.425	2.03085e-168	EC	NFE2
MA0084.1	1.14857e-270	1.09921	0.805	0.461	7.27045e-268	EC	SRY
MA0139.1	3.72775e-184	1.02793	0.768	0.506	2.35966e-181	EC	CTCF
MA1652.1	2.03945e-292	0.975221	0.811	0.477	1.29097e-289	EC	ZKSCAN5
MA1101.2	3.71978e-140	0.973129	0.691	0.423	2.35462e-137	EC	BACH2
MA0137.3	1.41002e-224	0.915656	0.79	0.472	8.92546e-222	EC	STAT1
MA0671.1	3.25951e-191	0.906996	0.758	0.47	2.06327e-188	EC	NFIX
MA1418.1	4.24426e-212	0.87776	0.775	0.484	2.68662e-209	EC	IRF3
MA1527.1	1.24556e-176	0.856399	0.741	0.456	7.88441e-174	EC	NFIC(var.2)
MA0523.1	1.54673e-158	0.845989	0.722	0.473	9.7908e-156	EC	TCF7L2
MA1528.1	3.50643e-168	0.83924	0.736	0.455	2.21957e-165	EC	NFIX(var.2)
MA1643.1	2.30712e-171	0.818844	0.742	0.453	1.46041e-168	EC	NFIB
MA1525.1	1.21235e-182	0.811714	0.757	0.485	7.67416e-180	EC	NFATC4
MA1561.1	9.62888e-165	0.797998	0.739	0.482	6.09508e-162	EC	SOX12
MA0517.1	4.24997e-200	0.793522	0.77	0.476	2.69023e-197	EC	STAT1::STAT2
MA0119.1	6.14866e-156	0.778749	0.727	0.462	3.8921e-153	EC	NFIC::TLX1
MA1633.1	2.07755e-106	0.741127	0.656	0.431	1.31509e-103	EC	BACH1
MA0625.1	3.50575e-151	0.739983	0.732	0.486	2.21914e-148	EC	NFATC3
MA1513.1	0	0.738011	0.889	0.477	0	EC	KLF15
MA0149.1	1.99987e-187	0.736843	0.762	0.491	1.26592e-184	EC	EWSR1-FLI1
MA0670.1	1.58289e-129	0.722733	0.71	0.479	1.00197e-126	EC	NFIA
MA0442.2	4.7156e-143	0.710894	0.724	0.471	2.98497e-140	EC	SOX10
MA0769.2	1.00677e-120	0.708395	0.7	0.472	6.37282e-118	EC	TCF7
MA1500.1	2.09482e-136	0.696727	0.72	0.479	1.32602e-133	EC	HOXB6
MA1640.1	5.22043e-129	0.690397	0.708	0.463	3.30453e-126	EC	MEIS2(var.2)
MA1113.2	4.70372e-129	0.689787	0.702	0.463	2.97745e-126	EC	PBX2
MA0018.4	9.8846e-127	0.683196	0.719	0.475	6.25695e-124	EC	CREB1
MA0707.1	9.62659e-135	0.669074	0.736	0.483	6.09363e-132	EC	MNX1
MA0144.2	4.70103e-137	0.663997	0.721	0.478	2.97575e-134	EC	STAT3
MA0152.1	2.03794e-126	0.65038	0.718	0.491	1.29002e-123	EC	NFATC2
MA1112.2	7.13445e-122	0.649261	0.707	0.479	4.51611e-119	EC	NR4A1
MA1131.1	1.31526e-104	0.645363	0.697	0.478	8.32561e-102	EC	FOSL2::JUN(var.2)
MA0703.2	2.38029e-118	0.642696	0.718	0.486	1.50673e-115	EC	LMX1B
MA0768.1	7.25386e-102	0.637524	0.684	0.475	4.59169e-99	EC	LEF1
MA1127.1	9.00176e-101	0.636074	0.692	0.476	5.69811e-98	EC	FOSB::JUN
MA1140.2	2.00972e-96	0.633842	0.69	0.476	1.27215e-93	EC	JUNB(var.2)
MA0161.2	2.75428e-102	0.633043	0.68	0.472	1.74346e-99	EC	NFIC
MA1136.1	6.50594e-99	0.621416	0.689	0.476	4.11826e-96	EC	FOSB::JUNB(var.2)
MA0652.1	7.85756e-107	0.613442	0.711	0.486	4.97384e-104	EC	IRF8
MA1647.1	1.10986e-123	0.602939	0.72	0.487	7.0254e-121	EC	PRDM4
MA1139.1	6.15825e-94	0.599873	0.69	0.477	3.89817e-91	EC	FOSL2::JUNB(var.2)
MA1639.1	1.27247e-96	0.585509	0.661	0.462	8.05475e-94	EC	MEIS1(var.2)
MA0079.4	3.27959e-180	0.580206	0.762	0.468	2.07598e-177	EC	SP1
MA1129.1	4.57531e-84	0.574891	0.672	0.476	2.89617e-81	EC	FOSL1::JUN(var.2)
MA0892.1	1.86054e-95	0.57242	0.703	0.489	1.17772e-92	EC	GSX1
MA0685.1	3.38997e-182	0.570202	0.767	0.475	2.14585e-179	EC	SP4
MA1519.1	4.84989e-99	0.567612	0.692	0.484	3.06998e-96	EC	LHX5
MA1632.1	2.59644e-91	0.567133	0.678	0.47	1.64355e-88	EC	ATF2
MA0089.2	5.34567e-78	0.565488	0.638	0.445	3.38381e-75	EC	NFE2L1
MA0051.1	8.96881e-85	0.557669	0.687	0.492	5.67726e-82	EC	IRF2
MA0721.1	7.31293e-92	0.557496	0.687	0.486	4.62908e-89	EC	UNCX
MA0662.1	1.72013e-91	0.555848	0.689	0.485	1.08884e-88	EC	MIXL1
MA1530.1	2.26592e-95	0.551333	0.697	0.484	1.43433e-92	EC	NKX6-3
MA0609.2	4.17264e-79	0.550864	0.656	0.473	2.64128e-76	EC	CREM
MA0746.2	7.46338e-196	0.545059	0.77	0.469	4.72432e-193	EC	SP3
MA0875.1	1.90264e-90	0.542301	0.685	0.487	1.20437e-87	EC	BARX1
MA0740.1	4.78563e-145	0.53499	0.742	0.481	3.02931e-142	EC	KLF14
MA0492.1	1.03646e-81	0.534313	0.675	0.475	6.56081e-79	EC	JUND(var.2)
MA0748.2	2.31648e-84	0.532543	0.665	0.463	1.46633e-81	EC	YY2
MA0834.1	2.76092e-74	0.529631	0.653	0.477	1.74766e-71	EC	ATF7
MA1470.1	3.71412e-85	0.529613	0.687	0.483	2.35104e-82	EC	BACH2(var.2)
MA0656.1	2.62544e-74	0.527997	0.669	0.48	1.6619e-71	EC	JDP2(var.2)
MA0702.2	3.47983e-82	0.527417	0.672	0.48	2.20273e-79	EC	LMX1A
MA1126.1	3.47821e-80	0.526724	0.669	0.477	2.20171e-77	EC	FOS::JUN(var.2)
MA1133.1	3.44293e-76	0.523231	0.68	0.483	2.17938e-73	EC	JUN::JUNB(var.2)
MA0050.2	3.70961e-116	0.520159	0.697	0.472	2.34818e-113	EC	IRF1
MA0715.1	8.62147e-87	0.51911	0.685	0.487	5.45739e-84	EC	PROP1
MA0903.1	1.40611e-80	0.51811	0.671	0.484	8.90067e-78	EC	HOXB3
MA0713.1	1.18754e-79	0.513343	0.672	0.49	7.51712e-77	EC	PHOX2A
MA1502.1	6.92478e-83	0.510197	0.676	0.485	4.38338e-80	EC	HOXB8
MA0463.2	8.73151e-81	0.509816	0.678	0.487	5.52705e-78	EC	BCL6
MA0775.1	1.04094e-82	0.509223	0.675	0.487	6.58917e-80	EC	MEIS3
MA0706.1	5.11166e-81	0.504599	0.677	0.487	3.23568e-78	EC	MEOX2
MA1639.11	0	4.59691	0.961	0.462	0	EpiC	MEIS1(var.2)
MA1640.12	0	3.77646	0.959	0.465	0	EpiC	MEIS2(var.2)
MA0727.11	3.67392e-190	3.76983	0.84	0.448	2.32559e-187	EpiC	NR3C2
MA0113.31	7.26556e-186	3.66624	0.827	0.449	4.5991e-183	EpiC	NR3C1
MA1113.21	0	3.64946	0.953	0.465	0	EpiC	PBX2
MA0868.21	3.25792e-215	3.54744	0.862	0.451	2.06226e-212	EpiC	SOX8
MA0077.11	1.90663e-214	3.0727	0.877	0.457	1.20689e-211	EpiC	SOX9
MA0781.1	3.77813e-231	2.91426	0.881	0.469	2.39155e-228	EpiC	PAX9
MA0779.1	1.29325e-224	2.87949	0.874	0.472	8.18628e-222	EpiC	PAX1
MA1643.12	5.77975e-241	2.75479	0.89	0.458	3.65858e-238	EpiC	NFIB
MA0161.21	5.05909e-268	2.74541	0.93	0.473	3.20241e-265	EpiC	NFIC
MA0867.21	1.14858e-189	2.72788	0.84	0.467	7.27053e-187	EpiC	SOX4
MA0103.3	0	2.68028	0.959	0.486	0	EpiC	ZEB1
MA1562.11	8.0815e-188	2.57594	0.84	0.466	5.11559e-185	EpiC	SOX14
MA0136.22	5.88128e-234	2.56272	0.902	0.426	3.72285e-231	EpiC	ELF5
MA1648.12	7.20824e-290	2.54757	0.939	0.489	4.56281e-287	EpiC	TCF12(var.2)
MA0522.31	1.06026e-285	2.52483	0.938	0.489	6.71146e-283	EpiC	TCF3
MA0523.11	2.27535e-221	2.51121	0.886	0.476	1.4403e-218	EpiC	TCF7L2
MA0143.41	1.60532e-183	2.48992	0.836	0.466	1.01617e-180	EpiC	SOX2
MA1120.11	1.69752e-179	2.48831	0.831	0.463	1.07453e-176	EpiC	SOX13
MA0830.2	2.2416e-276	2.46982	0.942	0.485	1.41893e-273	EpiC	TCF4
MA1528.12	7.2139e-237	2.4694	0.913	0.459	4.5664e-234	EpiC	NFIX(var.2)
MA0153.22	4.71271e-254	2.3943	0.932	0.476	2.98314e-251	EpiC	HNF1B
MA0070.11	2.60207e-237	2.35897	0.917	0.482	1.64711e-234	EpiC	PBX1
MA1527.12	5.54044e-235	2.34995	0.91	0.461	3.5071e-232	EpiC	NFIC(var.2)
MA1558.1	1.92933e-260	2.3369	0.924	0.482	1.22127e-257	EpiC	SNAI1
MA1152.13	1.5948e-159	2.2988	0.807	0.459	1.00951e-156	EpiC	SOX15
MA0768.11	2.34802e-207	2.29494	0.871	0.477	1.4863e-204	EpiC	LEF1
MA1559.11	3.07899e-253	2.29083	0.914	0.48	1.949e-250	EpiC	SNAI3
MA0769.21	4.29424e-217	2.29068	0.887	0.475	2.71825e-214	EpiC	TCF7
MA1631.1	2.80269e-264	2.27688	0.92	0.489	1.7741e-261	EpiC	ASCL1(var.2)
MA0671.11	2.36515e-238	2.26554	0.919	0.475	1.49714e-235	EpiC	NFIX
MA0745.21	4.53021e-247	2.22604	0.902	0.478	2.86762e-244	EpiC	SNAI2
MA0442.22	8.77246e-174	2.16165	0.836	0.476	5.55296e-171	EpiC	SOX10
MA0046.22	7.92329e-228	2.15321	0.898	0.477	5.01544e-225	EpiC	HNF1A
MA1105.21	1.73312e-240	2.13561	0.914	0.484	1.09706e-237	EpiC	GRHL2
MA0069.1	1.88172e-190	2.11791	0.862	0.48	1.19113e-187	EpiC	PAX6
MA0808.11	2.09634e-204	2.10867	0.884	0.465	1.32698e-201	EpiC	TEAD3
MA0598.32	2.87994e-191	2.05935	0.856	0.398	1.823e-188	EpiC	EHF
MA0119.12	6.24558e-218	2.0516	0.881	0.466	3.95345e-215	EpiC	NFIC::TLX1
MA0640.22	1.82703e-192	2.02495	0.862	0.412	1.15651e-189	EpiC	ELF3
MA0809.21	1.042e-196	2.01408	0.88	0.465	6.59584e-194	EpiC	TEAD4
MA0670.11	1.27938e-211	1.95207	0.901	0.481	8.09845e-209	EpiC	NFIA
MA1121.12	2.71726e-192	1.89642	0.884	0.469	1.72002e-189	EpiC	TEAD2
MA0090.31	1.98034e-189	1.8849	0.871	0.466	1.25355e-186	EpiC	TEAD1
MA0790.11	4.53543e-215	1.86478	0.908	0.484	2.87093e-212	EpiC	POU4F1
MA0647.13	3.45877e-199	1.75353	0.889	0.483	2.1894e-196	EpiC	GRHL1
MA1563.11	2.93194e-144	1.75278	0.797	0.477	1.85592e-141	EpiC	SOX18
MA0791.12	2.22283e-195	1.73705	0.877	0.484	1.40705e-192	EpiC	POU4F3
MA1500.11	1.76753e-199	1.70973	0.893	0.483	1.11885e-196	EpiC	HOXB6
MA0679.21	3.4159e-176	1.69934	0.849	0.481	2.16227e-173	EpiC	ONECUT1
MA0703.21	1.73025e-197	1.69177	0.883	0.489	1.09525e-194	EpiC	LMX1B
MA0641.14	2.07077e-176	1.68053	0.887	0.448	1.3108e-173	EpiC	ELF4
MA0743.2	4.89976e-193	1.64565	0.883	0.487	3.10155e-190	EpiC	SCRT1
MA1119.1	2.93874e-189	1.63855	0.883	0.485	1.86022e-186	EpiC	SIX2
MA0079.44	5.15173e-261	1.61955	0.933	0.473	3.26105e-258	EpiC	SP1
MA0707.11	5.94432e-184	1.61897	0.877	0.487	3.76275e-181	EpiC	MNX1
MA0473.32	1.03755e-159	1.61124	0.843	0.41	6.56771e-157	EpiC	ELF1
MA0681.23	6.4936e-199	1.60003	0.898	0.487	4.11045e-196	EpiC	PHOX2B
MA0084.13	3.11259e-142	1.59874	0.819	0.47	1.97027e-139	EpiC	SRY
MA0820.1	9.12695e-188	1.59675	0.884	0.484	5.77736e-185	EpiC	FIGLA
MA0599.12	3.18229e-298	1.59562	0.948	0.471	2.01439e-295	EpiC	KLF5
MA0528.21	7.44464e-234	1.59124	0.913	0.479	4.71246e-231	EpiC	ZNF263
MA0683.11	2.1193e-173	1.58444	0.858	0.492	1.34152e-170	EpiC	POU4F2
MA1504.11	3.93283e-179	1.58283	0.874	0.482	2.48948e-176	EpiC	HOXC4
MA1124.11	2.64869e-180	1.58189	0.868	0.487	1.67662e-177	EpiC	ZNF24
MA0744.2	2.58847e-188	1.57914	0.881	0.488	1.6385e-185	EpiC	SCRT2
MA1511.12	1.38872e-237	1.55472	0.924	0.48	8.79057e-235	EpiC	KLF10
MA0780.12	1.17425e-167	1.52536	0.868	0.486	7.43298e-165	EpiC	PAX3
MA0039.42	4.94485e-289	1.52001	0.948	0.474	3.13009e-286	EpiC	KLF4
MA0746.22	1.18537e-282	1.51633	0.956	0.473	7.5034e-280	EpiC	SP3
MA0741.12	4.49466e-279	1.47308	0.951	0.476	2.84512e-276	EpiC	KLF16
MA1107.2	9.19435e-225	1.44026	0.898	0.476	5.82002e-222	EpiC	KLF9
MA1653.11	8.03869e-274	1.43733	0.938	0.476	5.08849e-271	EpiC	ZNF148
MA1118.1	3.19024e-164	1.42067	0.873	0.489	2.01942e-161	EpiC	SIX1
MA1483.14	9.33726e-150	1.42017	0.859	0.455	5.91048e-147	EpiC	ELF2
MA0685.14	3.05027e-237	1.40547	0.924	0.48	1.93082e-234	EpiC	SP4
MA0149.11	5.42341e-171	1.37545	0.852	0.496	3.43302e-168	EpiC	EWSR1-FLI1
MA0702.21	1.0672e-156	1.37365	0.87	0.482	6.75536e-154	EpiC	LMX1A
MA1512.12	1.3102e-237	1.37069	0.923	0.478	8.29359e-235	EpiC	KLF11
MA1561.11	5.90396e-131	1.36068	0.825	0.487	3.73721e-128	EpiC	SOX12
MA1421.12	3.33518e-140	1.3597	0.834	0.483	2.11117e-137	EpiC	TCF7L1
MA0836.21	4.31304e-124	1.35287	0.853	0.459	2.73015e-121	EpiC	CEBPD
MA0628.11	5.11999e-151	1.35006	0.85	0.485	3.24095e-148	EpiC	POU6F1
MA1515.12	5.44429e-244	1.3466	0.932	0.472	3.44623e-241	EpiC	KLF2
MA1517.12	1.1328e-213	1.34511	0.919	0.483	7.17061e-211	EpiC	KLF6
MA0680.12	1.14757e-139	1.33906	0.85	0.486	7.26415e-137	EpiC	PAX7
MA0903.11	2.23628e-145	1.31896	0.849	0.485	1.41557e-142	EpiC	HOXB3
MA0757.12	4.31948e-131	1.3179	0.819	0.486	2.73423e-128	EpiC	ONECUT3
MA0162.42	6.06354e-242	1.31727	0.935	0.489	3.83822e-239	EpiC	EGR1
MA0062.32	2.59331e-132	1.31088	0.812	0.408	1.64157e-129	EpiC	GABPA
MA0747.12	3.7382e-227	1.31033	0.91	0.478	2.36628e-224	EpiC	SP8
MA1564.14	5.0905e-261	1.29543	0.939	0.479	3.22228e-258	EpiC	SP9
MA1530.11	1.14809e-140	1.29264	0.834	0.487	7.26739e-138	EpiC	NKX6-3
MA0884.13	7.74785e-154	1.29138	0.864	0.487	4.90439e-151	EpiC	DUXA
MA0913.21	4.6573e-140	1.27984	0.849	0.484	2.94807e-137	EpiC	HOXD9
MA0713.11	1.65464e-142	1.27958	0.862	0.491	1.04739e-139	EpiC	PHOX2A
MA1463.11	1.96004e-140	1.27097	0.833	0.487	1.24071e-137	EpiC	ARGFX
MA0715.12	1.65694e-139	1.27024	0.84	0.49	1.04884e-136	EpiC	PROP1
MA0662.11	2.68767e-139	1.26855	0.836	0.488	1.7013e-136	EpiC	MIXL1
MA1519.11	5.03662e-141	1.268	0.841	0.487	3.18818e-138	EpiC	LHX5
MA0499.2	2.93262e-128	1.26556	0.831	0.486	1.85635e-125	EpiC	MYOD1
MA0468.12	2.42574e-149	1.25807	0.862	0.492	1.53549e-146	EpiC	DUX4
MA0718.11	8.67266e-137	1.25496	0.833	0.486	5.48979e-134	EpiC	RAX
MA0764.22	7.38505e-116	1.25116	0.788	0.43	4.67474e-113	EpiC	ETV4
MA1516.12	9.54132e-189	1.24741	0.883	0.477	6.03966e-186	EpiC	KLF3
MA0892.11	1.49558e-127	1.23461	0.839	0.492	9.46704e-125	EpiC	GSX1
MA0145.32	1.34073e-134	1.23182	0.833	0.483	8.48683e-132	EpiC	TFCP2
MA0516.22	1.36257e-219	1.22562	0.911	0.482	8.62508e-217	EpiC	SP2
MA0674.11	4.46748e-133	1.22418	0.846	0.489	2.82792e-130	EpiC	NKX6-1
MA0675.11	4.46748e-133	1.22418	0.846	0.489	2.82792e-130	EpiC	NKX6-2
MA1513.13	1.03088e-268	1.22325	0.956	0.486	6.52544e-266	EpiC	KLF15
MA0732.12	4.59018e-194	1.22136	0.895	0.488	2.90558e-191	EpiC	EGR3
MA0101.12	2.26063e-134	1.21832	0.836	0.479	1.43098e-131	EpiC	REL
MA0802.12	2.14797e-117	1.21502	0.809	0.488	1.35967e-114	EpiC	TBR1
MA0890.11	3.82406e-123	1.21161	0.809	0.484	2.42063e-120	EpiC	GBX2
MA1497.11	1.35565e-132	1.21158	0.839	0.487	8.58125e-130	EpiC	HOXA6
MA0706.11	6.62281e-132	1.20953	0.843	0.489	4.19224e-129	EpiC	MEOX2
MA0465.22	2.54628e-130	1.20838	0.827	0.484	1.6118e-127	EpiC	CDX2
MA0740.14	9.24929e-195	1.19609	0.907	0.485	5.8548e-192	EpiC	KLF14
MA0051.12	2.42586e-116	1.19597	0.816	0.495	1.53557e-113	EpiC	IRF2
MA0721.11	9.85137e-131	1.19235	0.841	0.489	6.23592e-128	EpiC	UNCX
MA0875.11	8.20037e-123	1.18877	0.813	0.49	5.19083e-120	EpiC	BARX1
MA0688.12	2.61146e-114	1.18371	0.81	0.49	1.65305e-111	EpiC	TBX2
MA1507.1	4.08136e-121	1.17188	0.828	0.488	2.5835e-118	EpiC	HOXD4
MA0761.22	3.89109e-113	1.1713	0.782	0.404	2.46306e-110	EpiC	ETV1
MA1481.11	1.38369e-122	1.16203	0.818	0.488	8.75876e-120	EpiC	DRGX
MA0700.21	1.35406e-116	1.16193	0.801	0.493	8.57122e-114	EpiC	LHX2
MA0597.11	8.32941e-120	1.15421	0.812	0.488	5.27251e-117	EpiC	THAP1
MA0080.52	2.41945e-129	1.15198	0.822	0.453	1.53151e-126	EpiC	SPI1
MA1476.1	7.59504e-122	1.15186	0.818	0.491	4.80766e-119	EpiC	DLX5
MA1522.1	1.33957e-173	1.14325	0.861	0.484	8.47947e-171	EpiC	MAZ
MA0801.1	8.1854e-119	1.14016	0.818	0.486	5.18136e-116	EpiC	MGA
MA0803.1	8.1854e-119	1.14016	0.818	0.486	5.18136e-116	EpiC	TBX15
MA0756.11	1.09788e-111	1.13622	0.796	0.491	6.9496e-109	EpiC	ONECUT2
MA1501.11	3.07194e-118	1.1354	0.816	0.485	1.94454e-115	EpiC	HOXB7
MA1502.12	1.29359e-125	1.13151	0.824	0.487	8.18843e-123	EpiC	HOXB8
MA0775.12	3.79313e-122	1.12731	0.821	0.489	2.40105e-119	EpiC	MEIS3
MA1566.1	4.96483e-124	1.12398	0.83	0.487	3.14274e-121	EpiC	TBX3
MA0899.12	3.7063e-125	1.11869	0.825	0.484	2.34609e-122	EpiC	HOXA10
MA0517.12	2.08375e-119	1.11561	0.804	0.483	1.31901e-116	EpiC	STAT1::STAT2
MA0722.11	2.08461e-113	1.10941	0.821	0.485	1.31956e-110	EpiC	VAX1
MA0723.11	2.08461e-113	1.10941	0.821	0.485	1.31956e-110	EpiC	VAX2
MA0690.12	1.01664e-111	1.10059	0.804	0.491	6.43533e-109	EpiC	TBX21
MA0886.11	1.509e-110	1.09917	0.809	0.484	9.55199e-108	EpiC	EMX2
MA0498.22	7.11721e-121	1.09397	0.828	0.489	4.50519e-118	EpiC	MEIS1
MA1508.12	6.40708e-107	1.09388	0.775	0.422	4.05568e-104	EpiC	IKZF1
MA0630.11	1.71628e-109	1.08223	0.807	0.489	1.0864e-106	EpiC	SHOX
MA0654.11	1.71628e-109	1.08223	0.807	0.489	1.0864e-106	EpiC	ISX
MA0716.11	1.71628e-109	1.08223	0.807	0.489	1.0864e-106	EpiC	PRRX1
MA0717.11	1.71628e-109	1.08223	0.807	0.489	1.0864e-106	EpiC	RAX2
MA0644.11	3.64502e-115	1.08006	0.828	0.487	2.3073e-112	EpiC	ESX1
MA1505.11	4.05378e-113	1.07683	0.816	0.485	2.56604e-110	EpiC	HOXC8
MA1489.12	9.11342e-107	1.06788	0.809	0.486	5.7688e-104	EpiC	FOXN3
MA0658.11	3.27102e-108	1.06608	0.812	0.483	2.07056e-105	EpiC	LHX6
MA1471.12	2.18068e-107	1.06546	0.803	0.492	1.38037e-104	EpiC	BARX2
MA1112.22	2.94918e-103	1.06474	0.788	0.484	1.86683e-100	EpiC	NR4A1
MA0782.23	2.91675e-112	1.06453	0.803	0.479	1.8463e-109	EpiC	PKNOX1
MA0733.1	8.57847e-149	1.06422	0.853	0.488	5.43017e-146	EpiC	EGR4
MA0710.11	1.0216e-107	1.06143	0.796	0.484	6.46674e-105	EpiC	NOTO
MA1473.12	1.38229e-111	1.06138	0.813	0.488	8.74988e-109	EpiC	CDX4
MA1499.1	2.81226e-108	1.06116	0.813	0.488	1.78016e-105	EpiC	HOXB4
MA0645.13	4.6932e-108	1.06063	0.803	0.438	2.9708e-105	EpiC	ETV6
MA0472.21	3.84885e-131	1.0482	0.833	0.491	2.43632e-128	EpiC	EGR2
MA1567.12	8.26646e-99	1.0428	0.776	0.486	5.23267e-96	EpiC	TBX6
MA0661.11	1.40832e-103	1.03499	0.793	0.487	8.91464e-101	EpiC	MEOX1
MA0081.22	2.44574e-113	1.03444	0.796	0.44	1.54815e-110	EpiC	SPIB
MA0107.11	1.03987e-107	1.03432	0.8	0.478	6.58239e-105	EpiC	RELA
MA0750.24	1.30624e-109	1.03195	0.796	0.456	8.2685e-107	EpiC	ZBTB7A
MA0806.11	5.78976e-104	1.02849	0.803	0.485	3.66492e-101	EpiC	TBX4
MA0807.11	5.78976e-104	1.02849	0.803	0.485	3.66492e-101	EpiC	TBX5
MA1652.12	5.89339e-118	1.02517	0.806	0.486	3.73051e-115	EpiC	ZKSCAN5
MA0471.21	8.56453e-175	1.02337	0.89	0.494	5.42135e-172	EpiC	E2F6
MA0882.11	2.97943e-104	1.02269	0.803	0.488	1.88598e-101	EpiC	DLX6
MA0800.12	2.31061e-95	1.01173	0.785	0.491	1.46262e-92	EpiC	EOMES
MA1565.1	9.06583e-110	1.01117	0.804	0.484	5.73867e-107	EpiC	TBX18
MA0038.2	9.31283e-104	1.0027	0.806	0.49	5.89502e-101	EpiC	GFI1
MA1116.12	2.79254e-102	0.997491	0.796	0.488	1.76768e-99	EpiC	RBPJ
MA0144.21	5.00552e-108	0.994479	0.793	0.483	3.16849e-105	EpiC	STAT3
MA0509.21	4.35894e-98	0.994386	0.788	0.485	2.75921e-95	EpiC	RFX1
MA0878.22	1.91259e-98	0.993875	0.79	0.486	1.21067e-95	EpiC	CDX1
MA0793.11	1.60718e-92	0.993638	0.764	0.488	1.01734e-89	EpiC	POU6F2
MA1114.13	6.49029e-108	0.985671	0.787	0.477	4.10835e-105	EpiC	PBX3
MA0042.22	1.73495e-88	0.984283	0.778	0.482	1.09822e-85	EpiC	FOXI1
MA0033.22	1.73495e-88	0.984283	0.778	0.482	1.09822e-85	EpiC	FOXL1
MA0848.12	1.73495e-88	0.984283	0.778	0.482	1.09822e-85	EpiC	FOXO4
MA0849.12	1.73495e-88	0.984283	0.778	0.482	1.09822e-85	EpiC	FOXO6
MA0850.12	1.73495e-88	0.984283	0.778	0.482	1.09822e-85	EpiC	FOXP3
MA0466.21	2.33418e-77	0.982167	0.787	0.463	1.47753e-74	EpiC	CEBPB
MA0634.11	1.07897e-100	0.98039	0.804	0.492	6.82989e-98	EpiC	ALX3
MA0866.12	9.50128e-91	0.979566	0.781	0.489	6.01431e-88	EpiC	SOX21
MA0139.13	3.57816e-65	0.978198	0.751	0.513	2.26498e-62	EpiC	CTCF
MA0837.11	4.55073e-76	0.975769	0.773	0.465	2.88061e-73	EpiC	CEBPE
MA0774.11	1.03936e-98	0.97559	0.796	0.493	6.57916e-96	EpiC	MEIS2
MA0753.2	2.24916e-131	0.972996	0.818	0.481	1.42372e-128	EpiC	ZNF740
MA0076.24	1.06783e-88	0.967807	0.773	0.446	6.75937e-86	EpiC	ELK4
MA1649.1	2.25301e-84	0.952351	0.761	0.481	1.42615e-81	EpiC	ZBTB12
MA0593.12	1.56099e-82	0.949658	0.756	0.482	9.88106e-80	EpiC	FOXP2
MA0102.41	2.34803e-77	0.949507	0.779	0.464	1.48631e-74	EpiC	CEBPA
MA0050.23	7.13165e-104	0.948424	0.779	0.477	4.51433e-101	EpiC	IRF1
MA0784.13	1.70788e-103	0.945678	0.828	0.49	1.08109e-100	EpiC	POU1F1
MA0894.11	3.25257e-94	0.938782	0.799	0.484	2.05888e-91	EpiC	HESX1
MA0106.3	4.1961e-82	0.935783	0.772	0.48	2.65613e-79	EpiC	TP53
MA0805.12	3.27635e-89	0.930819	0.791	0.487	2.07393e-86	EpiC	TBX1
MA1644.14	7.89531e-88	0.926045	0.785	0.48	4.99773e-85	EpiC	NFYC
MA1601.1	1.29919e-88	0.926017	0.766	0.495	8.22388e-86	EpiC	ZNF75D
MA0914.12	2.40277e-93	0.922315	0.8	0.49	1.52095e-90	EpiC	ISL2
MA0765.24	6.61148e-80	0.921471	0.761	0.445	4.18506e-77	EpiC	ETV5
MA0889.1	3.49634e-87	0.917029	0.775	0.488	2.21319e-84	EpiC	GBX1
MA0031.12	3.40023e-77	0.914856	0.764	0.481	2.15234e-74	EpiC	FOXD1
MA0157.22	3.40023e-77	0.914856	0.764	0.481	2.15234e-74	EpiC	FOXO3
MA0652.12	2.61113e-84	0.91316	0.782	0.491	1.65285e-81	EpiC	IRF8
MA0804.12	2.02255e-83	0.90814	0.766	0.49	1.28027e-80	EpiC	TBX19
MA0258.22	7.81198e-69	0.898008	0.702	0.472	4.94498e-66	EpiC	ESR2
MA0060.34	1.71993e-79	0.896866	0.766	0.474	1.08872e-76	EpiC	NFYA
MA0687.12	3.97195e-93	0.896114	0.764	0.451	2.51424e-90	EpiC	SPIC
MA0798.21	7.41035e-81	0.895032	0.77	0.484	4.69075e-78	EpiC	RFX3
MA0137.31	6.11609e-92	0.892463	0.8	0.48	3.87149e-89	EpiC	STAT1
MA1518.1	1.27997e-86	0.88851	0.787	0.489	8.10219e-84	EpiC	LHX1
MA0785.11	5.91764e-89	0.888219	0.782	0.494	3.74587e-86	EpiC	POU2F1
MA1419.12	3.7403e-77	0.882472	0.761	0.491	2.36761e-74	EpiC	IRF4
MA0673.1	4.6686e-76	0.879238	0.759	0.489	2.95522e-73	EpiC	NKX2-8
MA1103.22	4.12658e-70	0.870264	0.756	0.481	2.61212e-67	EpiC	FOXK2
MA0901.22	2.99096e-89	0.869063	0.779	0.491	1.89328e-86	EpiC	HOXB13
MA0888.11	5.14399e-82	0.866571	0.772	0.483	3.25615e-79	EpiC	EVX2
MA1496.12	4.1824e-78	0.863323	0.767	0.49	2.64746e-75	EpiC	HOXA4
MA0666.1	6.53634e-81	0.861455	0.775	0.49	4.1375e-78	EpiC	MSX1
MA0708.1	6.53634e-81	0.861455	0.775	0.49	4.1375e-78	EpiC	MSX2
MA0876.1	6.53634e-81	0.861455	0.775	0.49	4.1375e-78	EpiC	BSX
MA0653.12	2.91858e-76	0.859872	0.766	0.487	1.84746e-73	EpiC	IRF9
MA0786.13	1.665e-89	0.859334	0.796	0.496	1.05395e-86	EpiC	POU3F1
MA0783.1	4.47687e-78	0.857707	0.767	0.486	2.83386e-75	EpiC	PKNOX2
MA0731.11	8.57e-82	0.8532	0.784	0.495	5.42481e-79	EpiC	BCL6B
MA0788.12	6.99451e-85	0.85302	0.796	0.494	4.42752e-82	EpiC	POU3F3
MA1418.12	6.34479e-83	0.850416	0.784	0.491	4.01625e-80	EpiC	IRF3
MA0657.12	2.94185e-90	0.846685	0.796	0.485	1.86219e-87	EpiC	KLF13
MA0701.21	9.0005e-74	0.83528	0.781	0.484	5.69732e-71	EpiC	LHX9
MA0792.11	1.85688e-79	0.834287	0.776	0.494	1.17541e-76	EpiC	POU5F1B
MA0738.11	2.08465e-73	0.834228	0.75	0.483	1.31958e-70	EpiC	HIC2
MA0797.1	1.82206e-76	0.832069	0.766	0.49	1.15337e-73	EpiC	TGIF2
MA0507.11	3.98747e-82	0.831961	0.77	0.493	2.52407e-79	EpiC	POU2F2
MA0838.11	1.11006e-60	0.83039	0.727	0.46	7.02669e-58	EpiC	CEBPG
MA0152.11	7.21158e-74	0.825105	0.759	0.497	4.56493e-71	EpiC	NFATC2
MA0852.22	2.5528e-62	0.822938	0.741	0.479	1.61592e-59	EpiC	FOXK1
MA0014.31	6.06091e-76	0.822236	0.767	0.483	3.83656e-73	EpiC	PAX5
MA1683.12	3.77116e-67	0.821291	0.741	0.479	2.38714e-64	EpiC	FOXA3
MA0772.12	1.31633e-77	0.819552	0.775	0.494	8.33238e-75	EpiC	IRF7
MA0627.21	3.08404e-79	0.815162	0.773	0.493	1.9522e-76	EpiC	POU2F3
MA0787.13	4.4745e-83	0.805685	0.797	0.497	2.83236e-80	EpiC	POU3F2
MA1549.1	4.96606e-67	0.804915	0.745	0.493	3.14352e-64	EpiC	POU6F1(var.2)
MA0650.22	9.34042e-76	0.804773	0.764	0.489	5.91248e-73	EpiC	HOXA13
MA0861.1	2.93259e-58	0.803908	0.705	0.482	1.85633e-55	EpiC	TP73
MA1577.11	2.88572e-68	0.795976	0.754	0.487	1.82666e-65	EpiC	TLX2
MA0900.21	3.46168e-68	0.795028	0.759	0.484	2.19124e-65	EpiC	HOXA2
MA0902.21	3.46168e-68	0.795028	0.759	0.484	2.19124e-65	EpiC	HOXB2
MA1125.14	8.38299e-80	0.794399	0.756	0.469	5.30643e-77	EpiC	ZNF384
MA1155.1	2.64211e-68	0.788251	0.736	0.488	1.67245e-65	EpiC	ZSCAN4
MA0613.12	4.74324e-60	0.787092	0.733	0.481	3.00247e-57	EpiC	FOXG1
MA0486.2	1.0152e-59	0.784176	0.727	0.474	6.42624e-57	EpiC	HSF1
MA1650.13	2.20762e-111	0.779061	0.83	0.505	1.39743e-108	EpiC	ZBTB14
MA0068.21	4.99234e-67	0.779	0.747	0.488	3.16015e-64	EpiC	PAX4
MA0075.31	2.01026e-67	0.776443	0.763	0.488	1.2725e-64	EpiC	PRRX2
MA0887.11	9.09368e-69	0.764034	0.756	0.484	5.7563e-66	EpiC	EVX1
MA0699.11	6.92873e-67	0.758253	0.75	0.491	4.38588e-64	EpiC	LBX2
MA0481.32	8.58568e-59	0.746804	0.735	0.48	5.43474e-56	EpiC	FOXP1
MA0047.32	2.85774e-57	0.745505	0.716	0.479	1.80895e-54	EpiC	FOXA2
MA1600.1	6.96943e-68	0.741154	0.757	0.485	4.41165e-65	EpiC	ZNF684
MA0510.21	5.26815e-57	0.739592	0.724	0.487	3.33474e-54	EpiC	RFX5
MA1479.1	2.61216e-64	0.736526	0.751	0.492	1.6535e-61	EpiC	DMRTC2
MA0689.11	1.96352e-60	0.735857	0.748	0.495	1.24291e-57	EpiC	TBX20
MA0651.12	1.71153e-67	0.734373	0.753	0.488	1.0834e-64	EpiC	HOXC11
MA0625.12	1.53586e-60	0.731917	0.738	0.492	9.72198e-58	EpiC	NFATC3
MA1588.1	1.16616e-60	0.731327	0.741	0.489	7.38181e-58	EpiC	ZNF136
MA0796.1	2.52314e-62	0.731201	0.76	0.492	1.59715e-59	EpiC	TGIF1
MA0642.1	8.78475e-65	0.729072	0.747	0.486	5.56075e-62	EpiC	EN2
MA0811.1	1.42318e-69	0.723809	0.748	0.497	9.0087e-67	EpiC	TFAP2B
MA1514.1	2.89665e-82	0.721749	0.778	0.493	1.83358e-79	EpiC	KLF17
MA1478.1	1.54898e-59	0.718762	0.745	0.489	9.80501e-57	EpiC	DMRTA2
MA0724.12	5.6116e-58	0.711668	0.73	0.487	3.55214e-55	EpiC	VENTX
MA0810.1	2.4708e-75	0.706943	0.759	0.494	1.56402e-72	EpiC	TFAP2A(var.2)
MA0030.12	5.73293e-56	0.705435	0.714	0.477	3.62894e-53	EpiC	FOXF2
MA0725.12	7.59351e-56	0.703423	0.719	0.488	4.80669e-53	EpiC	VSX1
MA0726.12	7.59351e-56	0.703423	0.719	0.488	4.80669e-53	EpiC	VSX2
MA0873.12	3.02526e-60	0.702543	0.73	0.487	1.91499e-57	EpiC	HOXD12
MA0132.21	8.83432e-54	0.701856	0.714	0.484	5.59212e-51	EpiC	PDX1
MA0612.21	8.83432e-54	0.701856	0.714	0.484	5.59212e-51	EpiC	EMX1
MA0893.21	8.83432e-54	0.701856	0.714	0.484	5.59212e-51	EpiC	GSX2
MA0895.12	2.63885e-57	0.700185	0.729	0.491	1.67039e-54	EpiC	HMBOX1
MA0771.1	2.996e-50	0.699425	0.696	0.474	1.89647e-47	EpiC	HSF4
MA0027.21	1.05852e-56	0.695036	0.714	0.488	6.70041e-54	EpiC	EN1
MA1115.11	3.61367e-60	0.690173	0.745	0.492	2.28745e-57	EpiC	POU5F1
MA0158.22	6.04767e-53	0.690115	0.726	0.489	3.82818e-50	EpiC	HOXA5
MA0028.24	6.47699e-48	0.686879	0.71	0.461	4.09993e-45	EpiC	ELK1
MA0755.11	3.72539e-53	0.685031	0.719	0.484	2.35817e-50	EpiC	CUX2
MA0754.11	2.06378e-55	0.682538	0.738	0.487	1.30637e-52	EpiC	CUX1
MA0513.1	2.4873e-55	0.676679	0.717	0.486	1.57446e-52	EpiC	SMAD2::SMAD3::SMAD4
MA0789.11	8.05137e-56	0.67635	0.738	0.494	5.09652e-53	EpiC	POU3F4
MA0524.2	2.26137e-60	0.669825	0.736	0.495	1.43145e-57	EpiC	TFAP2C
MA1655.11	3.934e-47	0.66967	0.696	0.49	2.49022e-44	EpiC	ZNF341
MA1656.1	3.06484e-54	0.669193	0.72	0.489	1.94005e-51	EpiC	ZNF449
MA0618.11	2.91298e-52	0.665925	0.72	0.489	1.84392e-49	EpiC	LBX1
MA1584.1	6.19334e-70	0.664339	0.754	0.501	3.92038e-67	EpiC	ZIC5
MA1495.11	5.72164e-47	0.658347	0.702	0.484	3.6218e-44	EpiC	HOXA1
MA0904.21	5.72164e-47	0.658347	0.702	0.484	3.6218e-44	EpiC	HOXB5
MA0770.1	5.97748e-47	0.656823	0.71	0.475	3.78374e-44	EpiC	HSF2
MA1579.1	5.09048e-45	0.651989	0.689	0.491	3.22227e-42	EpiC	ZBTB26
MA0525.2	7.37081e-40	0.642656	0.683	0.486	4.66572e-37	EpiC	TP63
MA1580.14	1.12562e-45	0.641888	0.707	0.489	7.12516e-43	EpiC	ZBTB32
MA1534.11	9.68164e-46	0.639296	0.719	0.492	6.12848e-43	EpiC	NR1I3
MA0697.1	4.45137e-62	0.638661	0.732	0.499	2.81772e-59	EpiC	ZIC3
MA0762.12	3.34656e-52	0.636306	0.698	0.436	2.11837e-49	EpiC	ETV2
MA0063.22	7.23889e-45	0.630795	0.679	0.491	4.58222e-42	EpiC	NKX2-5
MA0759.14	8.78583e-41	0.629956	0.683	0.453	5.56143e-38	EpiC	ELK3
MA0479.11	8.22342e-48	0.626278	0.72	0.492	5.20543e-45	EpiC	FOXH1
MA1102.22	2.78879e-81	0.626014	0.804	0.505	1.76531e-78	EpiC	CTCFL
MA1597.11	5.77804e-48	0.625359	0.721	0.49	3.6575e-45	EpiC	ZNF528
MA0138.2	5.84317e-48	0.624412	0.72	0.493	3.69873e-45	EpiC	REST
MA1498.12	7.45368e-50	0.62364	0.739	0.489	4.71818e-47	EpiC	HOXA7
MA0910.22	7.45368e-50	0.62364	0.739	0.489	4.71818e-47	EpiC	HOXD8
MA1110.12	6.44526e-44	0.623402	0.696	0.486	4.07985e-41	EpiC	NR1H4
MA1523.11	5.9662e-49	0.619626	0.717	0.495	3.77661e-46	EpiC	MSANTD3
MA0508.3	2.7104e-52	0.615175	0.742	0.498	1.71569e-49	EpiC	PRDM1
MA0912.21	1.18463e-45	0.605662	0.705	0.49	7.49869e-43	EpiC	HOXD3
MA1128.14	4.64859e-09	0.60557	0.523	0.429	2.94256e-06	EpiC	FOSL1::JUN
MA1645.11	8.41989e-42	0.60159	0.693	0.495	5.32979e-39	EpiC	NKX2-2
MA0043.31	1.23333e-41	0.600651	0.702	0.48	7.80695e-39	EpiC	HLF
MA1651.14	2.79658e-43	0.599047	0.684	0.475	1.77023e-40	EpiC	ZFP42
MA1546.13	1.31007e-40	0.597664	0.676	0.486	8.29275e-38	EpiC	PAX3(var.2)
MA1533.1	8.66008e-43	0.594121	0.687	0.489	5.48183e-40	EpiC	NR1I2
MA1657.11	7.77606e-44	0.587621	0.695	0.489	4.92225e-41	EpiC	ZNF652
MA0098.34	2.44305e-41	0.587453	0.676	0.449	1.54645e-38	EpiC	ETS1
MA1506.12	1.88549e-45	0.584016	0.721	0.488	1.19351e-42	EpiC	HOXD10
MA1525.12	1.27536e-43	0.581312	0.701	0.493	8.07301e-41	EpiC	NFATC4
MA0009.2	1.86453e-42	0.579577	0.699	0.489	1.18025e-39	EpiC	TBXT
MA1647.12	9.82393e-45	0.578274	0.707	0.493	6.21855e-42	EpiC	PRDM4
MA1142.13	5.88168e-09	0.572813	0.513	0.429	3.7231e-06	EpiC	FOSL1::JUND
MA0502.25	8.49891e-42	0.565316	0.711	0.48	5.37981e-39	EpiC	NFYB
MA0672.1	3.19817e-40	0.564022	0.693	0.494	2.02444e-37	EpiC	NKX2-3
MA1484.14	8.85034e-38	0.56366	0.676	0.449	5.60227e-35	EpiC	ETS2
MA0905.11	5.33509e-41	0.561565	0.698	0.49	3.37711e-38	EpiC	HOXC10
MA0696.1	2.88708e-45	0.557964	0.713	0.503	1.82752e-42	EpiC	ZIC1
MA1589.1	7.49607e-40	0.556123	0.687	0.486	4.74501e-37	EpiC	ZNF140
MA1137.13	3.18527e-08	0.553759	0.524	0.427	2.01627e-05	EpiC	FOSL1::JUNB
MA0655.13	1.13282e-11	0.553629	0.538	0.429	7.17075e-09	EpiC	JDP2
MA0600.21	6.56289e-32	0.553611	0.679	0.489	4.15431e-29	EpiC	RFX2
MA0812.1	3.16138e-44	0.553448	0.705	0.501	2.00115e-41	EpiC	TFAP2B(var.2)
MA0686.14	1.98457e-36	0.546263	0.673	0.475	1.25623e-33	EpiC	SPDEF
MA0072.12	6.02224e-34	0.540746	0.668	0.491	3.81208e-31	EpiC	RORA(var.2)
MA0610.1	1.52099e-36	0.540195	0.676	0.494	9.62788e-34	EpiC	DMRT3
MA0751.1	7.95674e-43	0.538062	0.705	0.501	5.03662e-40	EpiC	ZIC4
MA1130.13	4.12892e-07	0.537462	0.514	0.43	0.000261361	EpiC	FOSL2::JUN
MA0463.21	1.72907e-41	0.53447	0.71	0.492	1.0945e-38	EpiC	BCL6
MA1494.11	1.39191e-34	0.529691	0.667	0.485	8.81079e-32	EpiC	HNF4A(var.2)
MA1138.13	1.60772e-07	0.528538	0.52	0.429	0.000101769	EpiC	FOSL2::JUNB
MA0799.12	2.1571e-30	0.527795	0.673	0.488	1.36545e-27	EpiC	RFX4
MA1141.14	1.78047e-06	0.527597	0.513	0.428	0.00112704	EpiC	FOS::JUND
MA0506.13	3.10684e-50	0.525862	0.735	0.495	1.96663e-47	EpiC	NRF1
MA0074.1	1.53761e-31	0.52264	0.665	0.491	9.73309e-29	EpiC	RXRA::VDR
MA1585.12	3.77906e-35	0.51829	0.69	0.491	2.39214e-32	EpiC	ZKSCAN1
MA0908.12	7.71931e-36	0.517065	0.698	0.487	4.88632e-33	EpiC	HOXD11
MA0485.22	6.83729e-34	0.516735	0.677	0.484	4.328e-31	EpiC	HOXC9
MA0760.14	1.2417e-34	0.506928	0.661	0.445	7.85994e-32	EpiC	ERF
MA1503.12	3.91436e-32	0.50506	0.679	0.487	2.47779e-29	EpiC	HOXB9
MA0066.11	6.73722e-34	0.500026	0.686	0.487	4.26466e-31	EpiC	PPARG
MA1141.11	0	8.56902	0.937	0.417	0	GC	FOS::JUND
MA1128.11	0	8.41081	0.934	0.418	0	GC	FOSL1::JUN
MA0478.11	0	8.4039	0.939	0.415	0	GC	FOSL2
MA1130.11	0	8.38751	0.935	0.419	0	GC	FOSL2::JUN
MA0476.11	0	8.38186	0.938	0.416	0	GC	FOS
MA1137.11	0	8.35533	0.934	0.416	0	GC	FOSL1::JUNB
MA0477.21	0	8.33217	0.931	0.417	0	GC	FOSL1
MA0099.31	0	8.2532	0.935	0.417	0	GC	FOS::JUN
MA1142.11	0	8.1703	0.933	0.417	0	GC	FOSL1::JUND
MA1134.11	0	8.15138	0.935	0.419	0	GC	FOS::JUNB
MA1144.11	0	8.07106	0.936	0.417	0	GC	FOSL2::JUND
MA0489.11	0	8.03602	0.927	0.419	0	GC	JUN(var.2)
MA1634.11	0	8.02753	0.931	0.416	0	GC	BATF
MA0462.21	0	8.01565	0.934	0.416	0	GC	BATF::JUN
MA1135.11	0	7.94623	0.938	0.417	0	GC	FOSB::JUNB
MA0491.21	0	7.93772	0.929	0.419	0	GC	JUND
MA1138.11	0	7.91831	0.934	0.417	0	GC	FOSL2::JUNB
MA0835.21	0	7.86345	0.93	0.417	0	GC	BATF3
MA0490.21	0	7.80858	0.932	0.42	0	GC	JUNB
MA0511.2	0	7.18469	0.922	0.4	0	GC	RUNX2
MA1132.11	0	7.07952	0.932	0.425	0	GC	JUN::JUNB
MA0655.11	0	7.05882	0.937	0.418	0	GC	JDP2
MA1101.21	0	7.05211	0.93	0.422	0	GC	BACH2
MA0841.11	0	6.8354	0.934	0.424	0	GC	NFE2
MA1633.11	0	5.58951	0.927	0.428	0	GC	BACH1
MA0684.2	0	5.27503	0.926	0.432	0	GC	RUNX3
MA0089.21	0	4.59794	0.919	0.441	0	GC	NFE2L1
MA0036.31	0	4.36056	0.944	0.425	0	GC	GATA2
MA0037.31	0	4.33914	0.94	0.428	0	GC	GATA3
MA0482.21	0	4.30608	0.943	0.43	0	GC	GATA4
MA1104.21	0	4.20254	0.934	0.429	0	GC	GATA6
MA1540.11	0	4.08724	0.932	0.429	0	GC	NR5A1
MA0501.11	0	3.9511	0.93	0.444	0	GC	MAF::NFE2
MA0766.21	0	3.82651	0.941	0.437	0	GC	GATA5
MA0496.31	0	3.81664	0.935	0.436	0	GC	MAFK
MA0141.31	0	3.66233	0.929	0.429	0	GC	ESRRB
MA0592.31	0	3.61043	0.934	0.43	0	GC	ESRRA
MA1111.11	0	2.79263	0.93	0.439	0	GC	NR2F2
MA0160.11	0	2.609	0.921	0.446	0	GC	NR4A2
MA0035.41	0	2.36752	0.922	0.457	0	GC	GATA1
MA0846.11	0	2.30006	0.885	0.461	0	GC	FOXC2
MA1536.11	0	2.18677	0.92	0.457	0	GC	NR2C2(var.2)
MA1632.11	0	1.90154	0.885	0.468	0	GC	ATF2
MA0847.21	9.63631e-280	1.82491	0.86	0.464	6.09978e-277	GC	FOXD2
MA0032.21	6.4247e-280	1.79233	0.859	0.466	4.06684e-277	GC	FOXC1
MA0492.11	3.63835e-278	1.71497	0.874	0.473	2.30308e-275	GC	JUND(var.2)
MA0071.11	9.58407e-302	1.70852	0.881	0.468	6.06671e-299	GC	RORA
MA0140.22	4.29687e-298	1.69605	0.888	0.471	2.71992e-295	GC	GATA1::TAL1
MA0018.41	2.23865e-256	1.68361	0.861	0.475	1.41707e-253	GC	CREB1
MA0030.11	9.57224e-261	1.61627	0.858	0.472	6.05923e-258	GC	FOXF2
MA0845.11	1.79673e-251	1.58085	0.849	0.469	1.13733e-248	GC	FOXB1
MA1145.11	1.4516e-226	1.47724	0.851	0.473	9.18866e-224	GC	FOSL2::JUND(var.2)
MA0488.11	9.88418e-218	1.43531	0.842	0.474	6.25668e-215	GC	JUN
MA0148.41	2.26157e-214	1.4181	0.839	0.477	1.43157e-211	GC	FOXA1
MA1126.11	1.87914e-220	1.40617	0.836	0.476	1.18949e-217	GC	FOS::JUN(var.2)
MA1487.11	2.96306e-201	1.40367	0.803	0.477	1.87562e-198	GC	FOXE1
MA0073.1	1.21252e-267	1.3819	0.846	0.471	7.67523e-265	GC	RREB1
MA0017.21	4.44294e-255	1.37692	0.871	0.453	2.81238e-252	GC	NR2F1
MA1131.11	1.8556e-199	1.35611	0.822	0.479	1.1746e-196	GC	FOSL2::JUN(var.2)
MA0593.11	2.40679e-206	1.34209	0.831	0.477	1.5235e-203	GC	FOXP2
MA0258.21	1.56216e-253	1.32923	0.878	0.466	9.88848e-251	GC	ESR2
MA0060.32	3.9031e-222	1.31559	0.866	0.469	2.47066e-219	GC	NFYA
MA1127.11	8.413e-201	1.3099	0.828	0.476	5.32543e-198	GC	FOSB::JUN
MA0084.12	3.03515e-192	1.25378	0.823	0.467	1.92125e-189	GC	SRY
MA1644.12	9.95954e-209	1.24418	0.862	0.476	6.30439e-206	GC	NFYC
MA0481.31	1.10341e-184	1.24309	0.813	0.476	6.98461e-182	GC	FOXP1
MA0852.21	9.04615e-187	1.23443	0.82	0.475	5.72621e-184	GC	FOXK1
MA1129.11	8.88502e-178	1.20594	0.817	0.476	5.62422e-175	GC	FOSL1::JUN(var.2)
MA0047.31	4.59032e-171	1.1953	0.807	0.474	2.90568e-168	GC	FOXA2
MA1143.11	2.17626e-187	1.19398	0.829	0.479	1.37757e-184	GC	FOSL1::JUND(var.2)
MA0613.11	5.39151e-182	1.18968	0.823	0.476	3.41282e-179	GC	FOXG1
MA1103.21	1.1229e-174	1.18703	0.805	0.477	7.10794e-172	GC	FOXK2
MA0031.11	9.2539e-169	1.1335	0.806	0.478	5.85772e-166	GC	FOXD1
MA0157.21	9.2539e-169	1.1335	0.806	0.478	5.85772e-166	GC	FOXO3
MA1683.11	4.12146e-163	1.13019	0.795	0.476	2.60889e-160	GC	FOXA3
MA0028.22	1.16704e-173	1.12766	0.834	0.455	7.38737e-171	GC	ELK1
MA1136.11	4.84387e-164	1.12457	0.814	0.477	3.06617e-161	GC	FOSB::JUNB(var.2)
MA1594.1	4.83275e-185	1.10963	0.832	0.485	3.05913e-182	GC	ZNF382
MA0095.22	1.12756e-177	1.10833	0.804	0.461	7.13747e-175	GC	YY1
MA1139.11	2.60699e-151	1.10377	0.795	0.478	1.65022e-148	GC	FOSL2::JUNB(var.2)
MA0042.21	4.86507e-160	1.09732	0.804	0.479	3.07959e-157	GC	FOXI1
MA0033.21	4.86507e-160	1.09732	0.804	0.479	3.07959e-157	GC	FOXL1
MA0848.11	4.86507e-160	1.09732	0.804	0.479	3.07959e-157	GC	FOXO4
MA0849.11	4.86507e-160	1.09732	0.804	0.479	3.07959e-157	GC	FOXO6
MA0850.11	4.86507e-160	1.09732	0.804	0.479	3.07959e-157	GC	FOXP3
MA0605.21	6.73519e-155	1.09619	0.801	0.48	4.26338e-152	GC	ATF3
MA1576.1	7.48274e-192	1.08977	0.832	0.474	4.73657e-189	GC	THRB(var.3)
MA0782.21	1.83479e-184	1.08757	0.832	0.476	1.16142e-181	GC	PKNOX1
MA0656.11	1.82269e-149	1.07122	0.799	0.48	1.15376e-146	GC	JDP2(var.2)
MA1152.12	2.26819e-143	1.05986	0.767	0.457	1.43577e-140	GC	SOX15
MA0609.21	2.46417e-145	1.05219	0.786	0.473	1.55982e-142	GC	CREM
MA1541.11	2.1091e-153	1.04034	0.798	0.473	1.33506e-150	GC	NR6A1
MA0502.22	1.46508e-169	1.03115	0.816	0.475	9.27394e-167	GC	NFYB
MA0748.22	2.17674e-164	1.01094	0.806	0.463	1.37787e-161	GC	YY2
MA1140.21	6.56045e-127	0.97429	0.772	0.478	4.15276e-124	GC	JUNB(var.2)
MA0834.11	9.43793e-132	0.973483	0.785	0.476	5.97421e-129	GC	ATF7
MA0759.12	1.78443e-132	0.949573	0.789	0.448	1.12954e-129	GC	ELK3
MA1535.1	1.29569e-141	0.935379	0.787	0.474	8.20171e-139	GC	NR2C1
MA0112.31	4.78117e-145	0.929023	0.796	0.467	3.02648e-142	GC	ESR1
MA1133.11	1.7082e-124	0.923232	0.77	0.484	1.08129e-121	GC	JUN::JUNB(var.2)
MA1521.1	2.25851e-129	0.909153	0.786	0.485	1.42964e-126	GC	MAFA
[truncated: 291 more rows]

## Sheet: ST7
Supplementary Table 7. Ageing associated differentially activated chromVAR motifs
[truncated: 696 more rows]

[truncated: 3 more sheets: ST8, ST9, ST10]
